# Supplementary material for: Upper airway gene expression reveals a more robust innate and adaptive immune response to SARS-CoV-2 in children compared with older adults
Source: medRxiv preprint, doi:10.1101/2021.07.15.21260285, version 1 (2021-07-19)
Supplement: Supplementary Data 1 [file 260285_file03.xlsx]

## Sheet: final_adults_covid_vs_no
ensembl_ID	gene	logFC	AveExpr	t	P.Value	adj.P.Val
ENSG00000000003	TSPAN6	0.0473018	5.16569	0.256696	0.79775	0.928336
ENSG00000000419	DPM1	0.192999	4.75615	1.58699	0.114527	0.414048
ENSG00000000457	SCYL3	0.200723	3.29232	1.7966	0.0743217	0.333005
ENSG00000000460	C1orf112	-0.191255	2.45372	-1.33288	0.184501	0.511528
ENSG00000000938	FGR	-0.773982	3.66686	-1.50001	0.135618	0.448169
ENSG00000000971	CFH	0.986349	4.65485	5.40969	2.31e-07	2.85e-05
ENSG00000001036	FUCA2	-0.144768	4.25447	-1.33053	0.185271	0.512563
ENSG00000001084	GCLC	0.0116097	7.18513	0.0550379	0.956178	0.987013
ENSG00000001167	NFYA	-0.148801	3.35117	-1.03974	0.300058	0.632814
ENSG00000001460	STPG1	0.0374609	4.44473	0.234877	0.81461	0.935436
ENSG00000001461	NIPAL3	-0.058075	4.19758	-0.564804	0.573013	0.822696
ENSG00000001497	LAS1L	0.0376087	2.94699	0.258021	0.796728	0.927827
ENSG00000001561	ENPP4	0.270529	4.23926	1.43451	0.153415	0.472989
ENSG00000001617	SEMA3F	-0.046819	4.00981	-0.250524	0.802509	0.93005
ENSG00000001626	CFTR	0.173574	5.38532	0.534006	0.594093	0.833834
ENSG00000001629	ANKIB1	-0.0396368	5.34682	-0.294941	0.768428	0.916062
ENSG00000001630	CYP51A1	0.194154	3.68862	1.45922	0.146502	0.463225
ENSG00000001631	KRIT1	0.157259	4.99882	1.19537	0.233744	0.568957
ENSG00000002016	RAD52	-0.0456244	3.45812	-0.262721	0.79311	0.926889
ENSG00000002330	BAD	-0.0319929	4.45303	-0.168324	0.866545	0.957748
ENSG00000002549	LAP3	1.68835	6.31726	10.1088	8.12e-19	5.34e-16
ENSG00000002586	CD99	-0.153398	5.56346	-1.33896	0.182517	0.50872
ENSG00000002587	HS3ST1	0.549622	3.27121	3.12322	0.00213044	0.0464166
ENSG00000002726	AOC1	-0.217457	-0.155538	-0.941553	0.347867	0.673771
ENSG00000002746	HECW1	-0.122845	0.0481583	-0.487556	0.626544	0.851449
ENSG00000002822	MAD1L1	0.206529	4.15214	1.30652	0.193285	0.522721
ENSG00000002834	LASP1	-0.142593	6.0307	-1.4454	0.150338	0.468565
ENSG00000002919	SNX11	-0.111081	4.53189	-0.548685	0.584001	0.82862
ENSG00000002933	TMEM176A	0.431443	2.10944	1.52455	0.129383	0.438306
ENSG00000003056	M6PR	0.259675	4.79836	2.0127	0.045855	0.261771
ENSG00000003096	KLHL13	0.202336	0.545878	1.02239	0.308167	0.641086
ENSG00000003147	ICA1	-0.0256343	4.8204	-0.181817	0.855961	0.952053
ENSG00000003249	DBNDD1	-0.255217	1.13399	-1.27716	0.203432	0.534674
ENSG00000003393	ALS2	0.0488762	4.33991	0.386019	0.700005	0.885763
ENSG00000003400	CASP10	0.0942225	4.58688	0.546983	0.585167	0.828769
ENSG00000003402	CFLAR	-0.0339163	7.63999	-0.268148	0.788938	0.92534
ENSG00000003436	TFPI	-0.156253	4.64769	-1.10563	0.270578	0.60571
ENSG00000003509	NDUFAF7	-0.0377083	2.66907	-0.213485	0.831226	0.942306
ENSG00000003756	RBM5	0.178298	6.91778	1.27462	0.204327	0.535637
ENSG00000003987	MTMR7	0.045396	2.29625	0.22382	0.823188	0.938771
ENSG00000003989	SLC7A2	0.238075	3.39595	0.951404	0.342861	0.669742
ENSG00000004059	ARF5	-0.230279	5.25571	-2.02288	0.0447817	0.259018
ENSG00000004139	SARM1	-0.12809	2.7758	-0.779492	0.436863	0.739498
ENSG00000004142	POLDIP2	-0.0489297	3.74363	-0.388157	0.698425	0.885054
ENSG00000004399	PLXND1	0.200949	2.80784	0.763849	0.446103	0.744907
ENSG00000004455	AK2	0.301435	5.59482	2.65319	0.00879294	0.107512
ENSG00000004468	CD38	0.948166	4.591	4.45763	1.57e-05	0.00120159
ENSG00000004478	FKBP4	0.132657	4.39545	0.811682	0.418203	0.72815
ENSG00000004487	KDM1A	-0.0509728	3.95467	-0.361924	0.717895	0.89394
ENSG00000004534	RBM6	0.239732	5.41517	1.86869	0.0635284	0.309086
ENSG00000004660	CAMKK1	-0.485347	1.1331	-2.23257	0.0269918	0.194136
ENSG00000004700	RECQL	-0.0693974	3.36882	-0.459101	0.646796	0.859861
ENSG00000004766	VPS50	0.742113	4.41113	5.07933	1.06e-06	0.000108779
ENSG00000004777	ARHGAP33	-0.00112021	2.96011	-0.00422327	0.996636	0.998598
ENSG00000004779	NDUFAB1	0.150537	4.93559	0.743381	0.458362	0.752236
ENSG00000004799	PDK4	-0.00192429	2.37353	-0.00809609	0.993551	0.99798
ENSG00000004809	SLC22A16	0.0141395	1.23348	0.0523321	0.958331	0.98736
ENSG00000004838	ZMYND10	0.227998	5.89236	0.904488	0.367122	0.68776
ENSG00000004846	ABCB5	-0.29708	1.23596	-1.56119	0.120492	0.424121
ENSG00000004848	ARX	-0.919214	1.08506	-2.84634	0.00501344	0.0779632
ENSG00000004864	SLC25A13	-0.226363	4.63596	-1.21681	0.225501	0.560724
ENSG00000004866	ST7	-0.026207	3.65113	-0.147612	0.882838	0.96383
ENSG00000004897	CDC27	0.187385	4.98984	1.56443	0.119729	0.423457
ENSG00000004939	SLC4A1	-0.211326	1.7933	-0.860749	0.390688	0.706365
ENSG00000004961	HCCS	0.325348	2.8185	2.24609	0.0260932	0.190423
ENSG00000004975	DVL2	-0.119865	4.30133	-0.94841	0.344378	0.671211
ENSG00000005001	PRSS22	-0.547571	5.70397	-2.45336	0.0152463	0.147498
ENSG00000005007	UPF1	0.0220346	5.61455	0.190227	0.849377	0.950098
ENSG00000005020	SKAP2	-0.207219	3.53896	-0.528825	0.597674	0.835959
ENSG00000005022	SLC25A5	-0.056778	6.6128	-0.381775	0.703144	0.886651
ENSG00000005059	MCUB	0.784265	3.03263	3.29727	0.00120741	0.0323969
ENSG00000005075	POLR2J	0.0930325	4.10576	0.615827	0.5389	0.801256
ENSG00000005100	DHX33	0.11573	1.98397	0.67008	0.503791	0.782042
ENSG00000005108	THSD7A	-0.510716	0.053625	-2.12816	0.0348844	0.223813
ENSG00000005156	LIG3	0.187648	4.84505	1.57466	0.117346	0.418878
ENSG00000005175	RPAP3	0.0595554	4.65136	0.607492	0.544402	0.804462
ENSG00000005187	ACSM3	0.0276415	4.90102	0.139142	0.889516	0.966743
ENSG00000005189	REXO5	-0.313982	3.53302	-1.12559	0.262056	0.597108
ENSG00000005194	CIAPIN1	0.0369559	3.63125	0.232197	0.816687	0.935685
ENSG00000005206	SPPL2B	0.0306574	5.22954	0.154926	0.877078	0.961126
ENSG00000005238	FAM214B	-0.587337	2.84827	-3.4699	0.000672289	0.0222503
ENSG00000005243	COPZ2	-0.216796	1.61781	-0.732583	0.464905	0.757538
ENSG00000005249	PRKAR2B	0.015019	3.56478	0.0634039	0.949525	0.985646
ENSG00000005302	MSL3	0.0855621	5.02203	0.780118	0.436495	0.739193
ENSG00000005339	CREBBP	-0.252012	6.7844	-1.3346	0.183938	0.510695
ENSG00000005379	TSPOAP1	-0.0199713	4.63095	-0.11434	0.909115	0.974148
ENSG00000005436	GCFC2	0.141509	3.52917	0.816911	0.415217	0.725479
ENSG00000005448	WDR54	0.110105	4.86477	0.501117	0.61699	0.846955
ENSG00000005469	CROT	-0.0971526	3.98675	-0.609104	0.543336	0.803588
ENSG00000005471	ABCB4	0.104059	0.520014	0.470741	0.638479	0.856355
ENSG00000005483	KMT2E	0.021513	6.53995	0.191498	0.848383	0.949501
ENSG00000005486	RHBDD2	0.117679	6.20827	0.782469	0.435117	0.737968
ENSG00000005700	IBTK	0.0515348	4.62964	0.502641	0.615921	0.84676
ENSG00000005801	ZNF195	0.327961	3.90086	2.70555	0.00757253	0.0987936
ENSG00000005810	MYCBP2	0.431944	4.6829	3.23814	0.00146809	0.0364931
ENSG00000005812	FBXL3	-0.0879482	4.41573	-1.00773	0.315132	0.648055
ENSG00000005844	ITGAL	0.435237	3.74393	1.59931	0.111763	0.408063
ENSG00000005882	PDK2	-0.0488608	3.37115	-0.260871	0.794534	0.927755
ENSG00000005884	ITGA3	-0.20928	4.53356	-1.28086	0.202133	0.533006
ENSG00000005889	ZFX	0.240884	4.86879	1.69932	0.0912382	0.369948
ENSG00000005893	LAMP2	-0.274393	5.16444	-2.31927	0.0216687	0.174111
ENSG00000005961	ITGA2B	0.0145577	0.22874	0.0595633	0.952579	0.986275
ENSG00000005981	ASB4	-0.0186075	2.56777	-0.100635	0.919969	0.976758
ENSG00000006007	GDE1	-0.117644	5.82115	-0.889365	0.375167	0.693756
ENSG00000006015	REX1BD	-0.0956069	3.52719	-0.630344	0.529385	0.795668
ENSG00000006016	CRLF1	-0.0911079	1.91734	-0.314246	0.753751	0.909356
ENSG00000006025	OSBPL7	0.269585	2.82147	1.33957	0.18232	0.50844
ENSG00000006042	TMEM98	0.399868	3.27496	2.06044	0.0410066	0.245744
ENSG00000006047	YBX2	-0.491414	1.25549	-1.85388	0.0656317	0.313522
ENSG00000006062	MAP3K14	0.0224672	2.76052	0.124174	0.901336	0.971558
ENSG00000006071	ABCC8	-0.295066	0.383697	-1.50932	0.133226	0.444734
ENSG00000006118	TMEM132A	-0.244038	2.8359	-0.928706	0.354467	0.679179
ENSG00000006125	AP2B1	0.157511	5.76217	1.35306	0.177981	0.504538
ENSG00000006194	ZNF263	0.000948521	3.21152	0.00716748	0.99429	0.998087
ENSG00000006210	CX3CL1	0.878942	3.22186	3.40002	0.000854371	0.0256686
ENSG00000006282	SPATA20	-0.083429	3.91552	-0.63376	0.527159	0.795074
ENSG00000006283	CACNA1G	-0.0345108	0.222343	-0.182998	0.855036	0.951707
ENSG00000006327	TNFRSF12A	-0.275151	2.45565	-1.08213	0.280856	0.614544
ENSG00000006377	DLX6	-0.492425	0.223558	-2.01127	0.0460076	0.261978
ENSG00000006432	MAP3K9	-0.292837	2.16172	-1.6862	0.0937427	0.37452
ENSG00000006451	RALA	-0.33163	4.36369	-2.01437	0.0456777	0.261117
ENSG00000006453	BAIAP2L1	0.0666738	5.82819	0.542236	0.588425	0.831096
ENSG00000006459	KDM7A	-0.0567363	4.3993	-0.634605	0.52661	0.794549
ENSG00000006468	ETV1	-0.161717	0.999494	-0.650947	0.516032	0.789923
ENSG00000006530	AGK	0.0749858	5.2018	0.646323	0.519014	0.790727
ENSG00000006534	ALDH3B1	-0.0215958	6.34491	-0.118127	0.906118	0.972974
ENSG00000006555	TTC22	-0.125861	2.8532	-0.780313	0.436381	0.739162
ENSG00000006576	PHTF2	0.124099	3.50787	0.90731	0.365633	0.687245
ENSG00000006607	FARP2	0.00759201	5.40569	0.0563163	0.955161	0.986668
ENSG00000006611	USH1C	0.662391	2.39095	2.28898	0.0234134	0.180058
ENSG00000006625	GGCT	0.22033	3.16467	1.22671	0.221768	0.556521
ENSG00000006634	DBF4	0.322867	3.06094	1.71427	0.088452	0.364841
ENSG00000006652	IFRD1	-0.744894	6.6161	-2.80197	0.00571875	0.0844586
ENSG00000006659	LGALS14	-0.33885	0.739104	-1.51456	0.131893	0.44197
ENSG00000006695	COX10	0.0751561	3.13953	0.845139	0.399319	0.712818
ENSG00000006704	GTF2IRD1	-0.323673	3.86935	-2.29834	0.0228617	0.178868
ENSG00000006712	PAF1	-0.268095	4.77919	-2.05503	0.0415329	0.247768
ENSG00000006715	VPS41	0.127902	4.87258	1.18558	0.237577	0.572982
ENSG00000006740	ARHGAP44	-0.0692344	3.11351	-0.394529	0.693726	0.88314
ENSG00000006744	ELAC2	0.145935	4.70329	1.03198	0.303666	0.636508
ENSG00000006747	SCIN	0.308357	5.06057	2.14844	0.0332114	0.218815
ENSG00000006756	ARSD	-0.259159	3.97203	-1.92091	0.0565545	0.291324
ENSG00000006757	PNPLA4	0.0374013	3.35921	0.231806	0.816991	0.935685
ENSG00000006831	ADIPOR2	0.00911056	4.58007	0.0648202	0.9484	0.985479
ENSG00000006837	CDKL3	-0.0300351	3.3229	-0.146508	0.883708	0.964217
ENSG00000007001	UPP2	0.110614	0.633119	0.587293	0.557851	0.812652
ENSG00000007038	PRSS21	0.0972409	0.284689	0.337117	0.736479	0.901341
ENSG00000007047	MARK4	-0.110756	4.15692	-0.94624	0.34548	0.671795
ENSG00000007062	PROM1	-0.0368143	7.03859	-0.114883	0.908685	0.97387
ENSG00000007080	CCDC124	0.171938	3.8964	1.15133	0.251348	0.585373
ENSG00000007129	CEACAM21	0.520308	0.737601	1.66187	0.0985341	0.382144
ENSG00000007168	PAFAH1B1	-0.206348	6.5268	-2.51177	0.0130231	0.135674
ENSG00000007171	NOS2	0.783588	4.07273	2.41932	0.0166922	0.153648
ENSG00000007174	DNAH9	0.166275	5.77709	0.553143	0.580952	0.826911
ENSG00000007202	KIAA0100	-0.103944	5.35239	-1.18083	0.239455	0.574766
ENSG00000007216	SLC13A2	-0.0539279	0.0566142	-0.243452	0.807973	0.932282
ENSG00000007237	AC005747.1	-0.293695	4.51214	-1.76891	0.0788497	0.344016
ENSG00000007255	TRAPPC6A	0.490457	2.81485	2.18738	0.0301936	0.207243
ENSG00000007264	MATK	0.0497992	2.2222	0.26067	0.794689	0.927755
ENSG00000007306	CEACAM7	-0.481106	0.608492	-1.55771	0.121314	0.425926
ENSG00000007341	ST7L	0.0635414	4.10839	0.359676	0.719573	0.894038
ENSG00000007350	TKTL1	-0.894351	-0.0797374	-2.38931	0.0180663	0.159043
ENSG00000007372	PAX6	-0.327497	3.34711	-1.57022	0.118376	0.420811
ENSG00000007376	RPUSD1	-0.199546	2.2524	-1.03984	0.300011	0.632814
ENSG00000007384	RHBDF1	-0.330795	3.02103	-1.41785	0.158217	0.479637
ENSG00000007392	LUC7L	0.144561	4.4108	1.02405	0.307388	0.640057
ENSG00000007402	CACNA2D2	0.268449	-0.109422	1.5213	0.130196	0.43955
ENSG00000007516	BAIAP3	-0.0325935	5.26257	-0.155027	0.876999	0.961126
ENSG00000007520	TSR3	-0.0618984	2.93329	-0.347954	0.728341	0.897089
ENSG00000007541	PIGQ	0.00777557	4.36329	0.0475532	0.962133	0.988218
ENSG00000007545	CRAMP1	0.139523	3.1876	0.816904	0.415221	0.725479
ENSG00000007866	TEAD3	-0.15521	3.27986	-1.09538	0.275029	0.609359
ENSG00000007923	DNAJC11	0.15745	4.31223	1.24086	0.216507	0.549349
ENSG00000007933	FMO3	-0.0456999	6.11308	-0.183943	0.854296	0.951476
ENSG00000007944	MYLIP	-0.133335	4.47045	-1.18633	0.237284	0.572496
ENSG00000007952	NOX1	0.065705	-0.141196	0.349582	0.727121	0.896505
ENSG00000007968	E2F2	0.0396097	-0.0123149	0.20382	0.838758	0.945318
ENSG00000008018	PSMB1	0.359835	5.90585	2.28242	0.0238069	0.181161
ENSG00000008083	JARID2	-0.406525	3.55808	-2.01526	0.0455832	0.261117
ENSG00000008086	CDKL5	-0.186207	4.28993	-1.42086	0.157339	0.478816
ENSG00000008118	CAMK1G	-1.32224	1.57285	-3.31811	0.00112634	0.0307898
ENSG00000008128	CDK11A	-0.120136	4.35663	-0.751882	0.453247	0.749431
ENSG00000008130	NADK	0.169928	6.145	1.0211	0.308777	0.641678
ENSG00000008226	DLEC1	-0.292832	5.915	-1.08601	0.279138	0.613687
ENSG00000008256	CYTH3	-0.40126	2.67035	-2.3103	0.022173	0.176091
ENSG00000008277	ADAM22	-0.0120119	0.787329	-0.0586828	0.953279	0.986275
ENSG00000008282	SYPL1	0.174173	5.10412	1.35448	0.177527	0.504299
ENSG00000008283	CYB561	0.203111	4.97469	1.36971	0.172734	0.498359
ENSG00000008294	SPAG9	-0.538875	6.13452	-3.31965	0.00112054	0.0307379
ENSG00000008311	AASS	-0.364898	1.95694	-2.50637	0.0132157	0.136065
ENSG00000008323	PLEKHG6	-0.767893	4.99879	-3.23017	0.00150699	0.036967
ENSG00000008324	SS18L2	0.311423	3.26606	1.71356	0.0885835	0.365002
ENSG00000008382	MPND	-0.406182	3.2258	-2.13871	0.0340054	0.221127
ENSG00000008394	MGST1	0.354091	5.86217	1.93886	0.0543108	0.285744
ENSG00000008405	CRY1	-0.197622	3.34024	-1.43042	0.154584	0.474553
ENSG00000008438	PGLYRP1	-0.705845	0.723877	-2.08209	0.0389564	0.238255
ENSG00000008441	NFIX	0.0231075	4.62093	0.122492	0.902666	0.971727
ENSG00000008513	ST3GAL1	-0.0961279	4.42438	-0.482753	0.629943	0.85286
ENSG00000008516	MMP25	-0.475291	3.60368	-1.14781	0.252792	0.586971
ENSG00000008517	IL32	0.841717	4.07667	2.62537	0.00951108	0.112373
ENSG00000008710	PKD1	-0.0803954	5.60871	-0.470831	0.638415	0.856341
ENSG00000008838	MED24	-0.0969691	5.69734	-0.807304	0.420713	0.730265
ENSG00000008853	RHOBTB2	0.27861	3.55101	1.78549	0.076112	0.336578
ENSG00000008869	HEATR5B	0.176051	5.35184	1.11449	0.266773	0.601374
ENSG00000008952	SEC62	0.0475909	5.91906	0.475447	0.635129	0.855207
ENSG00000008988	RPS20	0.109023	8.64165	0.626389	0.531969	0.797471
ENSG00000009307	CSDE1	0.00204676	7.04888	0.021518	0.98286	0.994327
ENSG00000009335	UBE3C	-0.0147925	4.91731	-0.136518	0.891587	0.967441
ENSG00000009413	REV3L	-0.0251191	5.7361	-0.180034	0.857358	0.952399
ENSG00000009709	PAX7	0.0383311	2.48327	0.148047	0.882495	0.96364
ENSG00000009724	MASP2	-0.182757	0.733577	-1.14287	0.25483	0.589463
ENSG00000009765	IYD	-0.272315	1.06544	-1.70599	0.0899877	0.367573
ENSG00000009780	FAM76A	-0.0256273	4.19469	-0.181082	0.856537	0.95209
ENSG00000009790	TRAF3IP3	0.036729	4.21019	0.150027	0.880936	0.962724
ENSG00000009830	POMT2	-0.252841	4.919	-1.25521	0.211268	0.543965
ENSG00000009844	VTA1	0.347313	4.13297	2.45021	0.0153751	0.147693
ENSG00000009950	MLXIPL	-0.382905	0.322277	-2.0516	0.0418695	0.248786
ENSG00000009954	BAZ1B	0.0874808	3.94859	0.792831	0.429073	0.73493
ENSG00000010017	RANBP9	-0.149919	4.7269	-1.41645	0.158625	0.48017
ENSG00000010030	ETV7	1.85279	2.55416	7.37233	9.03e-12	2.26e-09
ENSG00000010072	SPRTN	-0.0583126	3.0447	-0.458551	0.647191	0.85999
ENSG00000010165	EEF1AKNMT	0.16195	3.12579	0.915669	0.361244	0.684277
ENSG00000010219	DYRK4	0.485276	3.03908	1.99019	0.048306	0.269233
ENSG00000010244	ZNF207	0.169478	6.67435	1.6963	0.091811	0.371126
ENSG00000010256	UQCRC1	0.061515	5.34638	0.462695	0.644224	0.858679
ENSG00000010270	STARD3NL	0.102669	3.91243	0.964176	0.33644	0.664701
ENSG00000010278	CD9	-0.12935	6.93885	-0.712806	0.477024	0.76465
ENSG00000010282	HHATL	0.43403	2.03123	1.54555	0.124227	0.431023
ENSG00000010292	NCAPD2	-0.181656	4.18455	-1.18448	0.238014	0.57351
ENSG00000010295	IFFO1	-0.177795	1.65045	-0.859643	0.391296	0.706688
ENSG00000010310	GIPR	-0.0951525	4.61623	-0.429323	0.668277	0.869491
ENSG00000010318	PHF7	-0.110692	3.58012	-0.606229	0.545238	0.80489
ENSG00000010322	NISCH	-0.0626202	4.86002	-0.483653	0.629306	0.85286
ENSG00000010327	STAB1	0.368435	1.59233	1.2647	0.207851	0.54046
ENSG00000010361	FUZ	0.225455	4.26673	1.23634	0.218177	0.551757
ENSG00000010379	SLC6A13	0.607964	2.06517	2.15461	0.0327169	0.217373
ENSG00000010404	IDS	-0.181642	6.17632	-2.14086	0.0338284	0.220668
ENSG00000010438	PRSS3	-0.249998	0.651177	-0.691268	0.490418	0.773866
ENSG00000010539	ZNF200	-0.148409	3.63167	-0.729597	0.466723	0.758465
ENSG00000010610	CD4	0.479207	3.68524	2.43576	0.0159793	0.150883
ENSG00000010626	LRRC23	0.211669	6.64447	0.9723	0.332397	0.661647
ENSG00000010671	BTK	0.107662	2.56446	0.291429	0.771108	0.917488
ENSG00000010704	HFE	0.176375	1.65463	0.964973	0.336042	0.664478
ENSG00000010803	SCMH1	0.0695054	4.00921	0.530592	0.596451	0.835098
ENSG00000010810	FYN	0.62298	4.42801	2.59314	0.0104089	0.118626
ENSG00000010818	HIVEP2	0.110257	4.16578	0.554562	0.579983	0.826538
ENSG00000010932	FMO1	0.296293	0.823837	1.1643	0.24607	0.580852
ENSG00000011007	ELOA	0.145731	3.58572	1.33092	0.185145	0.512563
ENSG00000011009	LYPLA2	-0.0331651	5.18531	-0.329839	0.741961	0.904122
ENSG00000011021	CLCN6	-0.0476869	3.5582	-0.288838	0.773087	0.918105
ENSG00000011028	MRC2	-0.0947592	0.959018	-0.414015	0.679428	0.875541
ENSG00000011105	TSPAN9	-0.0494459	1.85163	-0.203423	0.839068	0.945377
ENSG00000011114	BTBD7	-0.306365	4.24085	-2.82114	0.00540364	0.0815053
ENSG00000011132	APBA3	0.0617216	2.75156	0.385955	0.700052	0.885763
ENSG00000011143	MKS1	0.426936	4.12441	1.91423	0.0574097	0.293715
ENSG00000011198	ABHD5	-0.759151	5.16468	-4.14167	5.61e-05	0.00332931
ENSG00000011201	ANOS1	-0.0924224	1.22191	-0.377627	0.706217	0.887724
ENSG00000011243	AKAP8L	0.0351453	5.47448	0.240022	0.810626	0.933204
ENSG00000011258	MBTD1	-0.0770377	3.22727	-0.56456	0.573179	0.822859
ENSG00000011260	UTP18	0.12113	3.96409	0.778198	0.437623	0.740186
ENSG00000011275	RNF216	0.0952684	4.21127	0.826178	0.409957	0.72193
ENSG00000011295	TTC19	-0.0898945	4.44504	-0.673644	0.501528	0.781372
ENSG00000011304	PTBP1	-0.0380996	6.35086	-0.340777	0.733727	0.899718
ENSG00000011332	DPF1	0.123069	0.633356	0.588329	0.557156	0.812202
ENSG00000011347	SYT7	-0.373122	1.69559	-1.47057	0.143408	0.459752
ENSG00000011376	LARS2	0.0920671	3.15775	0.62689	0.531642	0.797261
ENSG00000011405	PIK3C2A	-0.0662813	4.20889	-0.598143	0.550606	0.808482
ENSG00000011422	PLAUR	-0.775365	6.39157	-1.85488	0.0654882	0.313522
ENSG00000011426	ANLN	0.221349	2.01194	0.869061	0.38614	0.702717
ENSG00000011451	WIZ	0.0164468	2.4985	0.11495	0.908631	0.97387
ENSG00000011454	RABGAP1	0.0749033	5.29683	0.561503	0.575255	0.823612
ENSG00000011465	DCN	-0.0061952	2.53685	-0.0323013	0.974273	0.991917
ENSG00000011478	QPCTL	-0.395743	1.97199	-2.05599	0.0414385	0.247392
ENSG00000011485	PPP5C	0.0459087	4.49715	0.318064	0.750859	0.907672
ENSG00000011523	CEP68	-0.589735	3.92621	-2.92968	0.00389902	0.0676329
ENSG00000011566	MAP4K3	-0.00107279	5.064	-0.00563398	0.995512	0.99836
ENSG00000011590	ZBTB32	0.576542	1.37996	2.31305	0.0220175	0.175625
ENSG00000011600	TYROBP	0.115021	6.24855	0.327317	0.743864	0.905076
ENSG00000011638	TMEM159	-0.0916095	3.81981	-0.681813	0.496362	0.777932
ENSG00000012048	BRCA1	0.122743	3.35044	0.893017	0.373214	0.692878
ENSG00000012061	ERCC1	-0.110711	5.36102	-0.954965	0.341063	0.66794
ENSG00000012124	CD22	0.242477	2.10243	0.666946	0.505786	0.783516
ENSG00000012171	SEMA3B	-0.604875	2.22216	-2.34491	0.0202827	0.16918
ENSG00000012174	MBTPS2	0.0937381	1.70927	0.783718	0.434386	0.737968
ENSG00000012211	PRICKLE3	0.113278	2.49768	0.662186	0.508823	0.785228
ENSG00000012223	LTF	-0.470649	1.9717	-1.29144	0.19845	0.529126
ENSG00000012232	EXTL3	-0.319535	3.8183	-1.72687	0.0861571	0.359893
ENSG00000012504	NR1H4	0.00897969	-0.352263	0.0398794	0.96824	0.990148
ENSG00000012660	ELOVL5	-0.0520041	5.82499	-0.505565	0.613871	0.84601
ENSG00000012779	ALOX5	-0.585636	4.11474	-1.43105	0.154404	0.474305
ENSG00000012817	KDM5D	-0.248997	1.66175	-0.608046	0.544036	0.804106
ENSG00000012822	CALCOCO1	-0.0684046	5.27133	-0.676068	0.499992	0.780365
ENSG00000012963	UBR7	0.166035	3.29748	1.08273	0.280589	0.614544
ENSG00000012983	MAP4K5	-0.0472052	4.8085	-0.425668	0.670933	0.871428
ENSG00000013016	EHD3	-0.362171	0.788165	-1.62593	0.105969	0.396547
ENSG00000013275	PSMC4	0.150826	4.48094	1.24877	0.213606	0.546151
ENSG00000013288	MAN2B2	-0.153062	3.10042	-1.73521	0.0846653	0.357257
ENSG00000013293	SLC7A14	-0.318983	2.30102	-1.19382	0.234348	0.569425
ENSG00000013297	CLDN11	-0.0729727	1.42614	-0.343118	0.731969	0.89903
ENSG00000013306	SLC25A39	-0.187467	4.85656	-1.35564	0.17716	0.504299
ENSG00000013364	MVP	0.0199366	6.37399	0.23443	0.814957	0.935519
ENSG00000013374	NUB1	0.73404	5.9523	5.18046	6.71e-07	7.34e-05
ENSG00000013375	PGM3	0.361649	4.41186	2.28704	0.0235288	0.180594
ENSG00000013392	RWDD2A	0.166625	0.721868	0.984819	0.326228	0.657584
ENSG00000013441	CLK1	-0.0225768	5.87548	-0.166948	0.867625	0.95827
ENSG00000013503	POLR3B	-0.363632	2.77158	-2.03422	0.0436122	0.25506
ENSG00000013523	ANGEL1	0.182806	1.94801	1.16368	0.246317	0.580872
ENSG00000013561	RNF14	-0.0590085	4.39889	-0.478717	0.632806	0.853825
ENSG00000013563	DNASE1L1	0.0133774	3.09821	0.0908771	0.927706	0.97849
ENSG00000013573	DDX11	0.0148671	4.17302	0.0692644	0.944867	0.983806
ENSG00000013583	HEBP1	0.120319	3.43612	0.723502	0.470448	0.759895
ENSG00000013588	GPRC5A	-0.477086	4.38021	-2.19097	0.0299279	0.206226
ENSG00000013619	MAMLD1	-0.519486	0.484463	-1.95615	0.0522212	0.280642
ENSG00000013725	CD6	0.691149	5.04789	3.65109	0.000355175	0.0138325
ENSG00000013810	TACC3	-0.215018	3.38368	-0.853242	0.394825	0.708749
ENSG00000014123	UFL1	0.0873498	3.3943	0.646522	0.518885	0.790726
ENSG00000014138	POLA2	0.175921	3.54563	0.964882	0.336087	0.664478
ENSG00000014164	ZC3H3	-0.492484	3.38756	-2.66687	0.00845799	0.105378
ENSG00000014216	CAPN1	-0.114786	6.79526	-1.08516	0.279514	0.613687
ENSG00000014257	ACPP	-0.365314	2.40618	-1.7604	0.0802864	0.34713
ENSG00000014824	SLC30A9	0.105471	4.53661	0.927964	0.35485	0.679712
ENSG00000014914	MTMR11	-0.0929577	1.5686	-0.451648	0.652145	0.862293
ENSG00000014919	COX15	-0.0466758	3.9302	-0.421156	0.674217	0.873105
ENSG00000015133	CCDC88C	0.355206	6.00578	2.16855	0.0316221	0.21297
ENSG00000015153	YAF2	0.0169786	4.07635	0.132179	0.895012	0.96911
ENSG00000015171	ZMYND11	-0.0898458	4.42993	-0.6681	0.505051	0.78296
ENSG00000015285	WAS	0.113971	4.16345	0.31406	0.753892	0.909387
ENSG00000015475	BID	-0.491348	4.73095	-2.05854	0.0411901	0.246375
ENSG00000015479	MATR3	0.236243	6.22158	2.06663	0.0404107	0.243654
ENSG00000015532	XYLT2	0.0914876	3.00837	0.72858	0.467344	0.758465
ENSG00000015568	RGPD5	0.0971791	5.48559	0.363165	0.71697	0.893517
ENSG00000015592	STMN4	-0.157174	0.0367315	-0.99002	0.323687	0.655225
ENSG00000015676	NUDCD3	0.126413	4.30626	0.923375	0.357228	0.680923
ENSG00000016082	ISL1	0.472504	0.976983	2.25455	0.0255439	0.188097
ENSG00000016391	CHDH	-0.216332	0.693573	-1.43873	0.152216	0.471354
ENSG00000016402	IL20RA	0.090885	3.37679	0.369167	0.712501	0.891431
ENSG00000016602	CLCA4	-0.368057	2.18898	-1.1813	0.239268	0.574513
ENSG00000016864	GLT8D1	0.107373	4.97002	0.732392	0.465021	0.757538
ENSG00000017260	ATP2C1	0.11628	5.44419	0.902394	0.36823	0.688716
ENSG00000017427	IGF1	0.451673	1.50728	2.16868	0.031612	0.21297
ENSG00000017483	SLC38A5	1.16257	0.489458	4.00082	9.7e-05	0.00504906
ENSG00000017797	RALBP1	-0.19206	4.6283	-2.37577	0.0187181	0.162667
ENSG00000018189	RUFY3	0.110888	5.20297	0.770924	0.441911	0.741916
ENSG00000018236	CNTN1	-0.0562693	-0.239035	-0.209251	0.834523	0.943471
ENSG00000018280	SLC11A1	-1.14661	5.07484	-2.78956	0.0059317	0.0863638
ENSG00000018408	WWTR1	-0.0327219	4.69094	-0.21104	0.83313	0.942801
ENSG00000018510	AGPS	0.0708826	3.817	0.584039	0.560032	0.814051
ENSG00000018610	CXorf56	-0.0165012	3.58769	-0.116209	0.907635	0.973814
ENSG00000018699	TTC27	0.391019	3.11114	2.21246	0.0283781	0.200272
ENSG00000018869	ZNF582	0.393093	0.740533	1.73708	0.0843339	0.356239
ENSG00000019102	VSIG2	-0.204415	3.45136	-0.899214	0.369916	0.689971
ENSG00000019144	PHLDB1	-0.0845756	2.95088	-0.50573	0.613756	0.84601
ENSG00000019186	CYP24A1	0.493674	3.17669	1.64136	0.102723	0.390935
ENSG00000019485	PRDM11	0.448751	1.87662	2.75855	0.00649542	0.0903448
ENSG00000019549	SNAI2	-0.307761	-0.126486	-1.08591	0.279185	0.613687
ENSG00000019582	CD74	0.972943	9.21576	5.29351	3.98e-07	4.55e-05
ENSG00000019991	HGF	0.236927	0.142168	0.941914	0.347683	0.673546
ENSG00000019995	ZRANB1	-0.262582	3.32378	-2.13868	0.0340076	0.221127
ENSG00000020129	NCDN	0.0877347	2.94721	0.50203	0.616349	0.84676
ENSG00000020181	ADGRA2	-0.326089	0.198089	-1.19655	0.233287	0.568907
ENSG00000020256	ZFP64	-0.0884539	3.65508	-0.872555	0.384238	0.701456
ENSG00000020426	MNAT1	0.166345	5.01826	0.826088	0.410008	0.72193
ENSG00000020577	SAMD4A	0.198511	3.08436	1.08513	0.279529	0.613687
ENSG00000020633	RUNX3	0.174586	3.63257	0.602191	0.547916	0.806716
ENSG00000020922	MRE11	-0.0226702	3.84023	-0.189519	0.849931	0.950103
ENSG00000021300	PLEKHB1	0.0339992	4.4637	0.176394	0.860212	0.954359
ENSG00000021355	SERPINB1	-0.132013	6.72183	-0.691527	0.490256	0.773866
ENSG00000021461	CYP3A43	0.236947	0.53323	1.27023	0.20588	0.537997
ENSG00000021488	SLC7A9	-0.016503	0.544414	-0.0929211	0.926085	0.977624
ENSG00000021574	SPAST	-0.143542	4.40262	-1.54819	0.12359	0.430401
ENSG00000021645	NRXN3	0.0321928	0.684661	0.141166	0.88792	0.965663
ENSG00000021762	OSBPL5	0.0948634	3.66123	0.523231	0.601551	0.838393
ENSG00000021776	AQR	-0.0933082	4.07592	-0.804195	0.4225	0.731193
ENSG00000021826	CPS1	-0.113724	0.722678	-0.543773	0.587369	0.83053
ENSG00000022267	FHL1	0.565141	0.966292	2.27056	0.0245328	0.183565
ENSG00000022277	RTF2	-0.220221	5.03573	-1.67239	0.0964389	0.379203
ENSG00000022556	NLRP2	0.193855	3.03672	0.81013	0.419091	0.728782
ENSG00000022567	SLC45A4	-0.423735	4.98214	-2.37426	0.0187921	0.162772
ENSG00000022840	RNF10	-0.249831	6.76409	-2.42406	0.0164836	0.152945
ENSG00000022976	ZNF839	-0.226272	3.55443	-1.9016	0.0590541	0.2984
ENSG00000023041	ZDHHC6	0.138136	4.18876	0.911536	0.36341	0.685348
ENSG00000023171	GRAMD1B	0.323563	3.62315	2.09997	0.0373296	0.232372
ENSG00000023191	RNH1	-0.0630523	5.27606	-0.579852	0.562845	0.81612
ENSG00000023228	NDUFS1	-0.0303063	4.78372	-0.313132	0.754596	0.909817
ENSG00000023287	RB1CC1	-0.0740173	4.98953	-0.846255	0.398698	0.712463
ENSG00000023318	ERP44	0.272785	3.23517	2.7884	0.00595193	0.0864455
ENSG00000023330	ALAS1	-0.062802	4.68502	-0.543523	0.58754	0.830684
ENSG00000023445	BIRC3	0.492576	4.07065	2.99048	0.00323479	0.060097
ENSG00000023516	AKAP11	0.183871	3.51679	1.58697	0.114531	0.414048
ENSG00000023572	GLRX2	0.122441	2.57759	0.771728	0.441435	0.741795
ENSG00000023608	SNAPC1	-0.0960622	3.39115	-0.585082	0.559332	0.813569
ENSG00000023697	DERA	-0.0553334	4.11239	-0.474033	0.636135	0.855393
ENSG00000023734	STRAP	-0.163939	4.96717	-1.42947	0.154855	0.475109
ENSG00000023839	ABCC2	0.0695406	2.59967	0.324505	0.745988	0.906082
ENSG00000023892	DEF6	0.379195	3.62008	2.10654	0.0367468	0.230736
ENSG00000023902	PLEKHO1	0.392055	3.46061	1.29202	0.198249	0.528922
ENSG00000023909	GCLM	0.0460267	5.33767	0.367963	0.713396	0.892028
ENSG00000024048	UBR2	0.0189831	4.31312	0.187362	0.851619	0.950538
ENSG00000024422	EHD2	-0.0829451	1.74317	-0.322159	0.747761	0.906611
ENSG00000024526	DEPDC1	0.276207	0.0992864	1.26206	0.208798	0.541109
ENSG00000024862	CCDC28A	0.033756	3.91942	0.234146	0.815176	0.935519
ENSG00000025039	RRAGD	-0.456764	3.98394	-3.26998	0.00132183	0.0340673
ENSG00000025156	HSF2	0.0960508	3.37477	0.575063	0.566071	0.818241
ENSG00000025293	PHF20	-0.379349	5.21261	-3.24838	0.00141947	0.0355952
ENSG00000025434	NR1H3	0.620609	3.66927	3.09227	0.00235111	0.0492484
ENSG00000025708	TYMP	0.982316	6.99748	5.6052	9.13e-08	1.19e-05
ENSG00000025770	NCAPH2	0.116293	3.76849	0.708076	0.479948	0.766449
ENSG00000025772	TOMM34	0.175258	3.77924	1.18216	0.238931	0.574425
ENSG00000025796	SEC63	-0.0730413	5.49166	-0.641434	0.522176	0.79188
ENSG00000025800	KPNA6	0.0357317	4.20703	0.34804	0.728277	0.89708
ENSG00000026025	VIM	-0.487241	6.33215	-2.26233	0.0250484	0.186187
ENSG00000026036	RTEL1-TNFRSF6B	-0.282461	1.19212	-1.80375	0.073187	0.3302
ENSG00000026103	FAS	0.61907	4.27361	3.07641	0.00247224	0.0507083
ENSG00000026297	RNASET2	-0.140611	5.36908	-0.771731	0.441433	0.741795
ENSG00000026508	CD44	-0.576045	7.65257	-2.36922	0.0190411	0.164297
ENSG00000026559	KCNG1	-0.107963	-0.286221	-0.531747	0.595653	0.834687
ENSG00000026652	AGPAT4	-0.247216	2.35291	-1.10272	0.271836	0.606703
ENSG00000026751	SLAMF7	0.97034	3.1396	2.71054	0.00746469	0.0981171
ENSG00000026950	BTN3A1	1.43124	4.19223	7.66629	1.73e-12	4.62e-10
ENSG00000027001	MIPEP	0.136008	4.62573	0.600679	0.54892	0.807283
ENSG00000027075	PRKCH	-0.0664452	6.71908	-0.311969	0.755478	0.910257
ENSG00000027697	IFNGR1	-0.232031	5.34174	-1.40998	0.160524	0.482091
ENSG00000027847	B4GALT7	0.141545	3.25442	0.725935	0.468959	0.758932
ENSG00000027869	SH2D2A	0.467031	1.53127	1.49143	0.137856	0.450949
ENSG00000028116	VRK2	0.226041	4.51935	2.26373	0.0249598	0.185966
ENSG00000028137	TNFRSF1B	-0.0462176	4.5812	-0.102374	0.918591	0.976741
ENSG00000028203	VEZT	0.060751	5.20088	0.566231	0.572045	0.822005
ENSG00000028277	POU2F2	-0.124623	2.81766	-0.447288	0.655283	0.863653
ENSG00000028310	BRD9	-0.0328303	4.49284	-0.222586	0.824147	0.939574
ENSG00000028528	SNX1	0.136056	5.71453	1.02817	0.305452	0.638131
ENSG00000028839	TBPL1	0.530391	4.65446	3.2972	0.00120772	0.0323969
ENSG00000029153	ARNTL2	0.368737	4.00833	2.18301	0.0305198	0.208845
ENSG00000029363	BCLAF1	0.175941	6.47078	1.71836	0.0877019	0.363554
ENSG00000029364	SLC39A9	0.134707	4.43873	1.71363	0.0885694	0.365002
ENSG00000029534	ANK1	-0.0397302	0.000510616	-0.174773	0.861483	0.955271
ENSG00000029639	TFB1M	0.381551	3.17158	1.88405	0.061407	0.303165
ENSG00000029725	RABEP1	0.157256	4.79992	1.54288	0.124872	0.432404
ENSG00000029993	HMGB3	0.272969	4.2909	1.42599	0.155855	0.476496
ENSG00000030066	NUP160	0.102794	4.95136	0.750467	0.454096	0.749877
ENSG00000030110	BAK1	0.446927	2.79238	2.73836	0.0068882	0.0928612
ENSG00000030304	MUSK	0.178122	0.0859878	0.692567	0.489604	0.773406
ENSG00000030419	IKZF2	0.24216	5.37443	1.51634	0.131443	0.441225
ENSG00000030582	GRN	0.139223	6.27259	1.07363	0.284634	0.617627
ENSG00000031003	FAM13B	0.0165103	5.36029	0.187855	0.851233	0.950476
ENSG00000031081	ARHGAP31	-0.021074	1.34147	-0.0792148	0.936963	0.982019
ENSG00000031691	CENPQ	0.640979	0.84227	3.70818	0.000289064	0.0120301
ENSG00000031698	SARS1	-0.0458822	4.49091	-0.401377	0.688688	0.87989
ENSG00000031823	RANBP3	0.139392	5.39525	1.37141	0.172202	0.497462
ENSG00000032219	ARID4A	-0.0160105	4.29481	-0.126258	0.899689	0.971166
ENSG00000032389	EIPR1	0.269011	3.94453	1.64931	0.101084	0.386896
ENSG00000032444	PNPLA6	-0.408227	4.88335	-2.86037	0.0048075	0.0761332
ENSG00000032742	IFT88	-0.0907834	5.20188	-0.434466	0.664546	0.868065
ENSG00000033011	ALG1	-0.0497507	2.95491	-0.289572	0.772526	0.918105
ENSG00000033030	ZCCHC8	-0.142589	3.97196	-1.43788	0.152457	0.471563
ENSG00000033050	ABCF2	0.245932	2.72018	1.33986	0.182225	0.508265
ENSG00000033100	CHPF2	0.141321	3.12172	1.3447	0.180662	0.506471
ENSG00000033122	LRRC7	0.5353	0.485325	1.97914	0.0495485	0.272927
ENSG00000033170	FUT8	-0.0670635	4.93308	-0.443967	0.657678	0.865095
ENSG00000033178	UBA6	0.320318	5.13755	2.80057	0.00574252	0.0846511
ENSG00000033327	GAB2	-0.621455	4.48453	-2.27299	0.0243826	0.18275
ENSG00000033627	ATP6V0A1	-0.388012	4.85302	-2.21525	0.0281822	0.199514
ENSG00000033800	PIAS1	-0.0611524	5.50468	-0.504797	0.614409	0.846012
ENSG00000033867	SLC4A7	0.116924	3.6658	0.784401	0.433986	0.737796
ENSG00000034053	APBA2	0.606584	0.977435	2.44521	0.0155817	0.148862
ENSG00000034152	MAP2K3	-0.558784	6.30759	-3.07941	0.00244895	0.0504932
ENSG00000034239	EFCAB1	0.294334	6.27694	1.03081	0.304214	0.636811
ENSG00000034510	TMSB10	0.94582	9.64246	5.90249	2.14e-08	3.27e-06
ENSG00000034533	ASTE1	0.11002	2.11471	0.624239	0.533376	0.797965
ENSG00000034677	RNF19A	0.179622	6.01249	1.59262	0.113255	0.411607
ENSG00000034693	PEX3	0.466332	3.2499	2.5098	0.0130932	0.135674
ENSG00000034713	GABARAPL2	-0.175209	6.0791	-1.59213	0.113366	0.411689
ENSG00000035115	SH3YL1	0.0320598	5.1895	0.266996	0.789823	0.925491
ENSG00000035141	FAM136A	0.0957744	3.70403	0.77686	0.43841	0.740186
ENSG00000035403	VCL	-0.049647	4.0448	-0.322392	0.747584	0.906492
ENSG00000035499	DEPDC1B	-0.44404	0.952283	-2.03668	0.0433621	0.254057
ENSG00000035664	DAPK2	-0.391075	3.63642	-2.40581	0.0172989	0.156903
ENSG00000035681	NSMAF	-0.3718	6.24481	-1.66212	0.0984834	0.382142
ENSG00000035687	ADSS2	0.137007	5.59495	1.08481	0.279667	0.613687
ENSG00000035720	STAP1	1.1571	2.64353	4.77676	4.06e-06	0.0003516
ENSG00000035862	TIMP2	-0.503551	3.37739	-2.14716	0.0333148	0.219313
ENSG00000035928	RFC1	-0.0586403	5.63056	-0.563761	0.573721	0.823166
ENSG00000036054	TBC1D23	0.0412477	4.34991	0.338952	0.735098	0.90077
ENSG00000036257	CUL3	0.0334815	6.47573	0.357388	0.721281	0.894822
ENSG00000036448	MYOM2	0.117494	0.773428	0.423852	0.672254	0.871923
ENSG00000036530	CYP46A1	-0.137948	3.63307	-0.807615	0.420534	0.730114
ENSG00000036549	AC118549.1	0.255653	4.22175	1.94857	0.053129	0.283205
ENSG00000036565	SLC18A1	-0.2861	0.59271	-1.3248	0.187163	0.515116
ENSG00000036672	USP2	0.260491	4.12855	1.09792	0.273919	0.608097
ENSG00000036828	CASR	-0.52841	0.875623	-4.00168	9.67e-05	0.00504906
ENSG00000037042	TUBG2	-0.0547681	2.18114	-0.308203	0.758336	0.911292
ENSG00000037241	RPL26L1	0.300639	3.90382	1.8741	0.0627735	0.306731
ENSG00000037280	FLT4	-0.246269	0.417057	-1.53423	0.126984	0.435513
ENSG00000037474	NSUN2	0.189808	4.2478	2.04246	0.0427786	0.251959
ENSG00000037637	FBXO42	-0.106746	3.12232	-1.08193	0.280941	0.614544
ENSG00000037749	MFAP3	0.407196	4.58462	2.77063	0.00627025	0.0888596
ENSG00000037757	MRI1	-0.226833	2.80721	-1.62984	0.10514	0.39485
ENSG00000037897	METTL1	0.138178	1.55333	0.618488	0.537149	0.800119
ENSG00000038002	AGA	0.129636	2.61911	0.682598	0.495866	0.777839
ENSG00000038210	PI4K2B	0.602069	3.51709	4.04104	8.31e-05	0.00453497
ENSG00000038219	BOD1L1	-0.198548	4.75259	-1.515	0.131783	0.441853
ENSG00000038274	MAT2B	0.253859	5.29548	2.51705	0.0128372	0.134628
ENSG00000038358	EDC4	-0.277915	4.17385	-2.36746	0.0191286	0.164872
ENSG00000038382	TRIO	0.00824199	5.58601	0.065622	0.947762	0.985426
ENSG00000038427	VCAN	-0.655872	2.85267	-2.24706	0.0260296	0.190077
ENSG00000038532	CLEC16A	0.0648502	4.69831	0.647867	0.518017	0.790726
ENSG00000038945	MSR1	0.66549	4.47934	3.68387	0.000315643	0.012898
ENSG00000039068	CDH1	-0.081163	5.98859	-0.461195	0.645297	0.859081
ENSG00000039123	MTREX	0.180931	4.69563	1.7202	0.0873668	0.362678
ENSG00000039139	DNAH5	-0.0960749	5.57521	-0.30993	0.757025	0.910936
ENSG00000039319	ZFYVE16	0.0539184	5.34372	0.313584	0.754253	0.909531
ENSG00000039523	RIPOR1	-0.29037	4.24026	-2.04444	0.0425797	0.251351
ENSG00000039560	RAI14	-0.0657106	5.17231	-0.4454	0.656644	0.864256
ENSG00000039650	PNKP	0.0382446	5.11943	0.290848	0.771551	0.917604
ENSG00000039987	BEST2	-0.221332	1.4148	-0.7978	0.426191	0.733877
ENSG00000040199	PHLPP2	-0.0638628	2.18825	-0.456745	0.648485	0.860338
ENSG00000040275	SPDL1	0.341475	2.53113	1.70115	0.0908936	0.36909
ENSG00000040341	STAU2	0.0399221	5.54641	0.409366	0.682829	0.877272
ENSG00000040487	SLC66A1	-0.233067	2.6408	-1.33419	0.184073	0.510823
ENSG00000040531	CTNS	-0.137547	4.77579	-0.786862	0.432548	0.73657
ENSG00000040633	PHF23	-0.245526	4.41281	-1.73235	0.0851748	0.357522
ENSG00000040933	INPP4A	0.306019	3.81461	2.06082	0.0409694	0.245744
ENSG00000041353	RAB27B	0.505004	2.6895	2.41889	0.0167111	0.153648
ENSG00000041357	PSMA4	0.687203	6.41251	5.11505	9.03e-07	9.44e-05
ENSG00000041515	MYO16	-0.171857	0.118365	-1.05607	0.292558	0.626207
ENSG00000041802	LSG1	-0.0322568	4.59528	-0.236502	0.813352	0.934854
ENSG00000041880	PARP3	0.326045	3.44919	1.96635	0.051021	0.276881
ENSG00000041982	TNC	0.160704	2.49278	0.499277	0.618283	0.847426
ENSG00000041988	THAP3	-0.140552	2.28098	-0.633973	0.527021	0.795017
ENSG00000042062	RIPOR3	-0.390902	2.98584	-1.53475	0.126857	0.435471
ENSG00000042088	TDP1	0.0687352	4.24669	0.649664	0.516858	0.790344
ENSG00000042286	AIFM2	-0.249005	2.10877	-1.74785	0.0824446	0.352623
ENSG00000042304	C2orf83	-0.128349	0.949149	-0.608827	0.543519	0.803762
ENSG00000042317	AL049834.1	-0.0124107	4.69867	-0.060429	0.951891	0.986055
ENSG00000042429	MED17	-0.0128994	4.26732	-0.115594	0.908122	0.973814
ENSG00000042445	RETSAT	-0.0876206	3.90359	-0.836361	0.404223	0.716785
ENSG00000042493	CAPG	0.357355	4.94759	1.76626	0.0792958	0.345024
ENSG00000042753	AP2S1	0.307058	5.01347	1.92914	0.0555162	0.289145
ENSG00000042813	ZPBP	0.221115	-0.491486	0.907609	0.365475	0.687245
ENSG00000042832	TG	-0.0629119	2.58858	-0.1592	0.873716	0.959956
ENSG00000042980	ADAM28	0.399627	6.11095	1.73724	0.0843061	0.356236
ENSG00000043039	BARX2	-0.131167	1.47694	-0.671361	0.502977	0.782042
ENSG00000043093	DCUN1D1	0.192724	4.60297	1.8146	0.0714943	0.326108
ENSG00000043143	JADE2	0.507933	4.42744	4.03624	8.46e-05	0.00457231
ENSG00000043462	LCP2	0.254628	6.71008	0.577877	0.564175	0.817214
ENSG00000043514	TRIT1	0.356013	3.87623	1.96808	0.0508198	0.276312
ENSG00000043591	ADRB1	-0.165476	2.56937	-0.926995	0.355351	0.680129
ENSG00000044090	CUL7	0.011462	2.18546	0.0765034	0.939116	0.982725
ENSG00000044115	CTNNA1	-0.00100117	7.71507	-0.0076417	0.993913	0.998048
ENSG00000044446	PHKA2	-0.0333553	3.90671	-0.166193	0.868219	0.958302
ENSG00000044459	CNTLN	-0.197945	2.98775	-1.27699	0.20349	0.534674
ENSG00000044574	HSPA5	0.171599	5.67358	1.73651	0.0844347	0.356538
ENSG00000046604	DSG2	-0.198151	3.02922	-1.17363	0.242322	0.577275
ENSG00000046647	GEMIN8	0.166761	3.86003	0.928941	0.354345	0.679148
ENSG00000046651	OFD1	0.0761046	4.95302	0.628859	0.530355	0.796163
ENSG00000046653	GPM6B	0.0666198	3.22514	0.353529	0.724166	0.895769
ENSG00000047056	WDR37	-0.109314	3.72318	-0.864392	0.388691	0.70445
ENSG00000047188	YTHDC2	0.129345	3.80073	1.09793	0.273914	0.608097
ENSG00000047230	CTPS2	0.0506261	3.0182	0.401249	0.688782	0.879903
ENSG00000047249	ATP6V1H	0.0404543	5.01451	0.304877	0.760864	0.912261
ENSG00000047315	POLR2B	-0.233972	5.01901	-2.34599	0.0202258	0.168973
ENSG00000047346	FAM214A	-0.112485	6.15856	-0.862731	0.389601	0.705531
ENSG00000047365	ARAP2	0.409271	5.84629	2.98126	0.00332831	0.0612573
ENSG00000047410	TPR	0.130094	5.79451	1.37891	0.169884	0.494876
ENSG00000047457	CP	0.240914	6.51897	1.19558	0.233661	0.568907
ENSG00000047578	KIAA0556	0.0245645	6.05455	0.141139	0.887941	0.965663
ENSG00000047579	DTNBP1	-0.128976	3.60127	-0.747222	0.456047	0.750774
ENSG00000047597	XK	0.0757441	0.0510106	0.42237	0.673333	0.872534
ENSG00000047617	ANO2	0.0306677	-0.227109	0.0940799	0.925166	0.977232
ENSG00000047621	C12orf4	0.361319	4.29567	2.50721	0.0131858	0.135845
ENSG00000047634	SCML1	0.163979	1.9057	0.944282	0.346476	0.672555
ENSG00000047644	WWC3	-0.180594	3.12287	-1.47406	0.142468	0.458507
ENSG00000047648	ARHGAP6	0.167309	0.268293	0.858621	0.391858	0.707146
ENSG00000047849	MAP4	-0.0296942	4.7969	-0.279328	0.780361	0.921893
ENSG00000047932	GOPC	0.145807	2.6277	1.12515	0.262241	0.597131
ENSG00000048028	USP28	0.481629	4.23038	3.10894	0.00222976	0.0475271
ENSG00000048052	HDAC9	0.615344	4.05261	2.93185	0.00387335	0.0676329
ENSG00000048140	TSPAN17	0.202348	3.23425	1.47412	0.142451	0.458507
ENSG00000048162	NOP16	0.0753408	2.45007	0.383382	0.701955	0.886591
ENSG00000048342	CC2D2A	-0.252845	6.68508	-1.45788	0.146869	0.463658
ENSG00000048392	RRM2B	0.00254163	4.08792	0.0193697	0.984571	0.994724
ENSG00000048405	ZNF800	-0.092838	4.15909	-0.793325	0.428786	0.73493
ENSG00000048462	TNFRSF17	-0.29642	-0.194834	-1.12136	0.263845	0.598741
ENSG00000048471	SNX29	-0.157923	4.49397	-1.31274	0.191185	0.519386
ENSG00000048540	LMO3	0.455144	1.03637	1.3282	0.186038	0.513453
ENSG00000048544	MRPS10	0.0722621	3.53188	0.637987	0.524411	0.793053
ENSG00000048649	RSF1	0.0675427	5.32859	0.746652	0.45639	0.750774
ENSG00000048707	VPS13D	-0.0117853	5.42171	-0.0843758	0.932865	0.980448
ENSG00000048740	CELF2	-0.211544	4.14928	-0.785006	0.433633	0.737433
ENSG00000048828	FAM120A	-0.00359013	5.60098	-0.0421008	0.966472	0.989775
ENSG00000048991	R3HDM1	0.146423	4.79615	1.35774	0.176493	0.503711
ENSG00000049089	COL9A2	0.0483798	2.55192	0.250412	0.802596	0.930082
ENSG00000049130	KITLG	0.399072	3.11916	1.98057	0.0493868	0.272708
ENSG00000049167	ERCC8	0.222162	2.84955	1.45527	0.147591	0.46466
ENSG00000049239	H6PD	-0.185956	3.59151	-2.00255	0.0469461	0.26512
ENSG00000049245	VAMP3	0.200824	5.1037	1.77745	0.07743	0.340283
ENSG00000049246	PER3	0.0972914	3.55746	0.562742	0.574413	0.823432
ENSG00000049247	UTS2	0.0492084	-0.296989	0.156814	0.875593	0.960565
ENSG00000049249	TNFRSF9	-0.326964	1.64962	-1.54611	0.124092	0.430934
ENSG00000049283	EPN3	-0.250172	4.29183	-1.43285	0.153889	0.473798
ENSG00000049323	LTBP1	0.324649	1.31036	1.3293	0.185677	0.512991
ENSG00000049449	RCN1	0.181374	3.70924	1.13115	0.259717	0.594395
ENSG00000049540	ELN	-0.218148	5.12827	-1.00905	0.314504	0.647402
ENSG00000049541	RFC2	-0.167339	3.26662	-0.966	0.335529	0.66431
ENSG00000049618	ARID1B	-0.0516359	5.88408	-0.437007	0.662706	0.86776
ENSG00000049656	CLPTM1L	-0.0351465	5.52416	-0.315242	0.752996	0.90921
ENSG00000049759	NEDD4L	0.0686193	6.72505	0.419577	0.675368	0.874074
ENSG00000049768	FOXP3	-0.139522	-0.0189846	-0.561262	0.575419	0.823612
ENSG00000049769	PPP1R3F	0.177073	1.05497	0.93897	0.349188	0.674555
ENSG00000049860	HEXB	0.0627735	5.17135	0.540062	0.589919	0.831873
ENSG00000049883	PTCD2	0.0340048	1.61962	0.227027	0.820698	0.937355
ENSG00000050030	NEXMIF	-0.137882	0.450862	-0.770024	0.442442	0.742488
ENSG00000050130	JKAMP	0.384259	4.81374	3.05921	0.00261013	0.0526741
ENSG00000050165	DKK3	-0.148515	0.460557	-0.540827	0.589393	0.831527
ENSG00000050327	ARHGEF5	0.107805	3.82438	0.727987	0.467705	0.758465
ENSG00000050344	NFE2L3	-0.58444	5.38785	-2.20341	0.029022	0.202819
ENSG00000050393	MCUR1	-0.261621	2.56066	-1.766	0.0793381	0.345024
ENSG00000050405	LIMA1	0.0997985	5.32783	0.632591	0.527921	0.795351
ENSG00000050426	LETMD1	0.00710934	4.82509	0.0465833	0.962905	0.988666
ENSG00000050438	SLC4A8	-0.179759	4.08929	-0.845517	0.399109	0.712765
ENSG00000050628	PTGER3	0.129189	-0.12503	0.660518	0.509889	0.786006
ENSG00000050730	TNIP3	0.27321	2.26405	0.967207	0.334928	0.664046
ENSG00000050748	MAPK9	0.0317297	4.36308	0.293324	0.769662	0.916632
ENSG00000050820	BCAR1	-0.0103577	4.34151	-0.0610016	0.951435	0.985965
ENSG00000051009	FAM160A2	-0.124304	3.49866	-0.960906	0.338076	0.666008
ENSG00000051108	HERPUD1	-0.151846	6.47255	-1.4101	0.160487	0.482091
ENSG00000051128	HOMER3	-0.323184	2.68479	-1.59537	0.11264	0.410126
ENSG00000051180	RAD51	0.00434801	1.04967	0.020741	0.983479	0.994355
ENSG00000051341	POLQ	0.189353	2.12424	0.989162	0.324106	0.65582
ENSG00000051382	PIK3CB	-0.0951239	4.45231	-0.935707	0.350861	0.676389
ENSG00000051523	CYBA	0.227072	6.76714	1.59756	0.112151	0.408914
ENSG00000051596	THOC3	0.133114	5.00795	0.806025	0.421447	0.73035
ENSG00000051620	HEBP2	-0.166685	4.9864	-1.08963	0.277545	0.612268
ENSG00000051825	MPHOSPH9	0.0213152	4.43164	0.164962	0.869186	0.958362
ENSG00000052126	PLEKHA5	-0.0824693	6.16922	-0.420618	0.674609	0.873542
ENSG00000052344	PRSS8	-0.378368	4.19955	-1.88571	0.0611806	0.302793
ENSG00000052723	SIKE1	0.273547	3.60442	1.91775	0.0569583	0.292354
ENSG00000052749	RRP12	-0.121939	4.74971	-0.910909	0.363739	0.685537
ENSG00000052795	FNIP2	-0.0552729	3.73222	-0.319453	0.749808	0.907041
ENSG00000052802	MSMO1	0.062814	4.25188	0.450637	0.652873	0.862586
ENSG00000052841	TTC17	0.143316	5.24449	0.901653	0.368622	0.689058
ENSG00000053108	FSTL4	-0.0599901	2.69281	-0.248197	0.804306	0.930786
ENSG00000053254	FOXN3	-0.0718067	6.88457	-0.477806	0.633453	0.854029
ENSG00000053371	AKR7A2	0.00365294	4.07824	0.0234052	0.981357	0.994274
ENSG00000053372	MRTO4	-0.184732	2.84217	-1.28946	0.199133	0.529702
ENSG00000053438	NNAT	-0.18265	1.56286	-0.801273	0.424185	0.732515
ENSG00000053501	USE1	-0.0665909	3.11216	-0.338016	0.735803	0.901006
ENSG00000053524	MCF2L2	-0.568238	3.81449	-2.6749	0.00826695	0.10419
ENSG00000053702	NRIP2	-0.195647	1.07862	-1.20266	0.230917	0.566976
ENSG00000053747	LAMA3	0.0424785	2.69786	0.19707	0.844028	0.947399
ENSG00000053770	AP5M1	0.0931921	4.41167	0.750428	0.45412	0.749877
ENSG00000053900	ANAPC4	0.21071	4.42463	1.54887	0.123425	0.43026
ENSG00000053918	KCNQ1	-0.303865	2.97912	-1.67232	0.0964533	0.379203
ENSG00000054116	TRAPPC3	0.104146	4.16715	0.802221	0.423638	0.731957
ENSG00000054118	THRAP3	-0.0423634	5.63884	-0.517375	0.605623	0.840856
ENSG00000054148	PHPT1	0.204023	3.93398	0.93333	0.352082	0.676995
ENSG00000054179	ENTPD2	-0.00719818	-0.00951598	-0.0368397	0.97066	0.990724
ENSG00000054219	LY75	-0.00456251	4.31064	-0.0347303	0.972339	0.991411
ENSG00000054267	ARID4B	0.242284	5.38123	1.84628	0.0667332	0.316376
ENSG00000054277	OPN3	0.0472339	1.43637	0.226526	0.821087	0.937527
ENSG00000054282	SDCCAG8	0.224919	5.25154	1.42491	0.156167	0.476814
ENSG00000054392	HHAT	0.24568	2.37542	1.28196	0.201747	0.532757
ENSG00000054523	KIF1B	-0.337646	4.78169	-2.46172	0.0149086	0.145516
ENSG00000054598	FOXC1	-0.115022	2.89833	-0.633995	0.527006	0.795017
ENSG00000054611	TBC1D22A	-0.176945	4.11222	-1.51237	0.13245	0.442944
ENSG00000054654	SYNE2	-0.0683916	6.94691	-0.48131	0.630966	0.853278
ENSG00000054690	PLEKHH1	0.362106	5.21112	1.66199	0.0985095	0.382142
ENSG00000054793	ATP9A	-0.00863218	3.81545	-0.046892	0.962659	0.988559
ENSG00000054965	FAM168A	-0.38087	3.99382	-2.24928	0.0258852	0.189653
ENSG00000054967	RELT	-0.894689	3.21514	-2.40237	0.0174566	0.157321
ENSG00000054983	GALC	0.00881465	5.85527	0.0452926	0.963932	0.989172
ENSG00000055044	NOP58	0.458763	4.73755	3.04629	0.00271827	0.0537959
ENSG00000055070	SZRD1	0.202395	4.78887	2.06369	0.0406924	0.244884
ENSG00000055130	CUL1	0.173411	4.4892	1.68516	0.0939441	0.374755
ENSG00000055147	FAM114A2	0.451518	3.51193	3.06118	0.002594	0.0525226
ENSG00000055163	CYFIP2	-0.410947	5.69227	-2.53708	0.0121531	0.130473
ENSG00000055208	TAB2	-0.200468	5.57624	-2.00338	0.0468569	0.264802
ENSG00000055211	GINM1	-0.0184914	3.97311	-0.165798	0.868529	0.958329
ENSG00000055332	EIF2AK2	1.38878	5.58335	10.0215	1.39e-18	8.45e-16
ENSG00000055483	AC022966.1	-0.286762	4.80327	-1.86919	0.0634583	0.308929
ENSG00000055609	KMT2C	0.0465871	5.4478	0.436073	0.663383	0.867772
ENSG00000055732	MCOLN3	-0.365554	2.32467	-2.31809	0.0217348	0.174287
ENSG00000055917	PUM2	0.0773227	5.90701	0.865143	0.38828	0.704172
ENSG00000055950	MRPL43	0.191602	4.20821	1.1659	0.245422	0.580452
ENSG00000055955	ITIH4	0.181397	1.76442	0.724764	0.469675	0.759269
ENSG00000055957	ITIH1	0.198319	0.834737	0.81948	0.413754	0.724966
ENSG00000056050	HPF1	0.242423	2.94793	1.16535	0.245644	0.580724
ENSG00000056097	ZFR	-0.0391491	4.95813	-0.446956	0.655523	0.863717
ENSG00000056277	ZNF280C	0.222928	1.20034	1.57597	0.117046	0.418878
ENSG00000056558	TRAF1	0.0493203	2.00568	0.160838	0.872428	0.95939
ENSG00000056586	RC3H2	0.19123	4.41603	2.27779	0.0240878	0.182102
ENSG00000056736	IL17RB	0.0433149	0.682985	0.245724	0.806217	0.931131
ENSG00000056972	TRAF3IP2	-0.127823	4.45225	-1.01853	0.309995	0.64265
ENSG00000056998	GYG2	-0.445721	1.1432	-2.17411	0.0311941	0.211897
ENSG00000057019	DCBLD2	-0.00238006	4.5088	-0.0156305	0.987549	0.996037
ENSG00000057149	SERPINB3	0.569442	8.29605	1.89049	0.0605344	0.301137
ENSG00000057252	SOAT1	0.469911	4.44858	3.92367	0.000130109	0.00641314
ENSG00000057294	PKP2	-0.187935	4.06819	-1.28139	0.201946	0.532922
ENSG00000057608	GDI2	0.254971	6.0414	2.2851	0.0236453	0.180734
ENSG00000057657	PRDM1	-0.0934479	3.93138	-0.352438	0.724982	0.896242
ENSG00000057663	ATG5	0.276352	4.22419	2.68691	0.00798826	0.102309
ENSG00000057704	TMCC3	-0.2708	3.10782	-0.714365	0.476062	0.764241
ENSG00000057757	PITHD1	-0.12771	4.05848	-0.948235	0.344467	0.671238
ENSG00000057935	MTA3	-0.0634916	4.2637	-0.496878	0.61997	0.84808
ENSG00000058056	USP13	0.277376	1.17563	1.28991	0.198978	0.529665
ENSG00000058063	ATP11B	-0.336386	5.46918	-2.27768	0.0240948	0.182102
ENSG00000058085	LAMC2	0.192169	3.94535	0.952651	0.342231	0.669479
ENSG00000058091	CDK14	-0.23188	4.18008	-1.28385	0.201086	0.531771
ENSG00000058262	SEC61A1	0.0514715	4.96099	0.527219	0.598786	0.836821
ENSG00000058272	PPP1R12A	-0.000710121	5.73553	-0.00638053	0.994917	0.998208
ENSG00000058335	RASGRF1	0.563644	0.829739	2.48585	0.0139714	0.139929
ENSG00000058404	CAMK2B	-0.527229	2.63363	-1.22237	0.2234	0.558109
ENSG00000058453	CROCC	-0.02474	6.01344	-0.109021	0.913325	0.974871
ENSG00000058600	POLR3E	-0.095439	4.54205	-0.658352	0.511276	0.78669
ENSG00000058668	ATP2B4	-0.0704268	4.83644	-0.541427	0.58898	0.831096
ENSG00000058673	ZC3H11A	-0.0181399	5.17476	-0.201371	0.840669	0.946009
ENSG00000058729	RIOK2	0.304278	3.50317	1.48085	0.140651	0.455636
ENSG00000058799	YIPF1	0.0702697	4.12489	0.732186	0.465146	0.757538
ENSG00000058804	NDC1	-0.0763797	1.77187	-0.496813	0.620016	0.84808
ENSG00000058866	DGKG	0.167726	1.05497	0.709276	0.479205	0.766104
ENSG00000059122	FLYWCH1	0.0742256	4.42032	0.442393	0.658813	0.865522
ENSG00000059145	UNKL	0.234368	3.72636	1.16506	0.245761	0.580724
ENSG00000059377	TBXAS1	-0.500308	4.05533	-1.47961	0.14098	0.455876
ENSG00000059378	PARP12	1.38413	5.41977	7.91148	4.27e-13	1.25e-10
ENSG00000059573	ALDH18A1	0.210888	3.45386	1.30351	0.194309	0.522831
ENSG00000059588	TARBP1	0.043687	4.29664	0.218293	0.827484	0.94061
ENSG00000059691	GATB	0.096393	2.47962	0.560021	0.576263	0.824125
ENSG00000059728	MXD1	-0.457414	5.85693	-1.51063	0.132893	0.443904
ENSG00000059758	CDK17	0.351026	5.41166	2.46093	0.0149404	0.145736
ENSG00000059769	DNAJC25	-0.0811583	1.57916	-0.500644	0.617323	0.847139
ENSG00000059804	SLC2A3	-0.90799	6.10141	-2.25308	0.0256389	0.188445
ENSG00000059915	PSD	-0.561678	2.81459	-1.70349	0.0904546	0.368572
ENSG00000060069	CTDP1	-0.275126	4.58956	-1.3965	0.164535	0.488465
ENSG00000060138	YBX3	-0.178418	6.90261	-1.53021	0.127977	0.436733
ENSG00000060140	STYK1	0.515484	3.2579	2.43801	0.015884	0.150383
ENSG00000060237	WNK1	-0.101399	6.55891	-1.0004	0.318655	0.650445
ENSG00000060339	CCAR1	-0.0351148	5.64258	-0.306467	0.759655	0.911815
ENSG00000060491	OGFR	0.212645	4.2974	1.59046	0.113742	0.412617
ENSG00000060558	GNA15	-0.283213	3.55708	-1.75393	0.0813928	0.350289
ENSG00000060642	PIGV	0.0650231	3.14403	0.429086	0.668449	0.869491
ENSG00000060656	PTPRU	-0.0453759	4.6735	-0.220272	0.825945	0.939942
ENSG00000060688	SNRNP40	0.23297	4.06875	1.64701	0.101555	0.387573
ENSG00000060749	QSER1	-0.251107	3.35873	-1.65073	0.100793	0.386552
ENSG00000060762	MPC1	0.184462	5.33885	1.27356	0.204702	0.536163
ENSG00000060971	ACAA1	-0.256033	5.67047	-2.12672	0.0350055	0.224174
ENSG00000060982	BCAT1	-0.0932545	3.32223	-0.541135	0.589182	0.831305
ENSG00000061273	HDAC7	-0.00141217	5.5957	-0.013613	0.989156	0.99661
ENSG00000061337	LZTS1	-0.507357	-0.0840584	-2.09499	0.0377769	0.233852
ENSG00000061656	SPAG4	-0.227839	2.2487	-1.05358	0.293694	0.627446
ENSG00000061676	NCKAP1	-0.114386	5.00981	-0.722771	0.470896	0.760178
ENSG00000061794	MRPS35	0.115197	4.04879	0.682213	0.496109	0.777839
ENSG00000061918	GUCY1B1	0.240048	0.200057	1.11517	0.266479	0.601313
ENSG00000061936	SFSWAP	0.0158286	4.36481	0.133	0.894364	0.968753
ENSG00000061938	TNK2	-0.0438511	4.16256	-0.263038	0.792866	0.926889
ENSG00000061987	MON2	0.150007	5.29897	1.05702	0.292125	0.625704
ENSG00000062038	CDH3	-0.481281	3.45189	-2.64744	0.00893739	0.108438
ENSG00000062194	GPBP1	0.195237	6.06531	2.27443	0.0242941	0.18256
ENSG00000062282	DGAT2	-1.22014	3.63253	-2.7815	0.0060738	0.0871761
ENSG00000062370	ZNF112	0.330514	1.01522	1.57518	0.117228	0.418878
ENSG00000062485	CS	-0.146719	5.84301	-1.6824	0.0944788	0.375747
ENSG00000062524	LTK	0.273198	1.57873	1.43165	0.15423	0.473954
ENSG00000062582	MRPS24	-0.0803648	4.7822	-0.586382	0.558461	0.812902
ENSG00000062598	ELMO2	0.211437	4.42286	1.65737	0.0994406	0.383772
ENSG00000062650	WAPL	-0.184032	4.40637	-2.2727	0.0244006	0.18275
ENSG00000062716	VMP1	-0.35432	7.15562	-2.03817	0.0432109	0.253748
ENSG00000062725	APPBP2	0.0458352	4.04719	0.436464	0.6631	0.86776
ENSG00000062822	POLD1	-0.0071096	2.16413	-0.0380544	0.969693	0.990443
ENSG00000063015	SEZ6	-0.514553	1.93244	-1.51724	0.131216	0.440917
ENSG00000063046	EIF4B	-0.212712	6.47242	-1.70134	0.0908577	0.36909
ENSG00000063127	SLC6A16	0.429168	1.95521	1.89383	0.0600859	0.300271
ENSG00000063169	BICRA	-0.100016	3.07646	-0.652106	0.515286	0.789318
ENSG00000063176	SPHK2	-0.00970279	2.83976	-0.0651674	0.948124	0.985479
ENSG00000063177	RPL18	-0.0693617	7.86002	-0.437835	0.662107	0.867538
ENSG00000063180	CA11	-0.518493	1.65104	-1.90986	0.0579748	0.295164
ENSG00000063241	ISOC2	0.412325	3.53589	2.17913	0.0308123	0.210118
ENSG00000063244	U2AF2	0.121876	5.70308	1.27605	0.203822	0.535278
ENSG00000063245	EPN1	-0.0231285	4.79548	-0.187828	0.851254	0.950476
ENSG00000063322	MED29	-0.246475	4.4972	-1.68016	0.0949145	0.376438
ENSG00000063438	AHRR	0.0117852	0.10591	0.0371322	0.970427	0.99065
ENSG00000063587	ZNF275	-0.00771765	1.0298	-0.0432149	0.965585	0.98961
ENSG00000063601	MTMR1	0.0008794	4.45701	0.00820826	0.993461	0.99798
ENSG00000063660	GPC1	-0.0332404	3.72448	-0.181289	0.856375	0.95209
ENSG00000063761	ADCK1	0.210072	1.84621	1.07888	0.282296	0.615432
ENSG00000063854	HAGH	0.0737867	4.46422	0.56123	0.57544	0.823612
ENSG00000063978	RNF4	0.114163	4.94211	1.1647	0.245905	0.580724
ENSG00000064012	CASP8	0.192433	5.27757	1.89836	0.0594834	0.299181
ENSG00000064042	LIMCH1	0.468373	3.51567	2.4063	0.0172767	0.156876
ENSG00000064102	INTS13	0.286703	3.45415	1.91182	0.05772	0.294348
ENSG00000064115	TM7SF3	0.25538	5.13126	1.58828	0.114235	0.413464
ENSG00000064199	SPA17	0.432525	5.37409	1.7282	0.0859174	0.359253
ENSG00000064201	TSPAN32	0.126446	0.763512	0.547934	0.584515	0.82862
ENSG00000064205	CCN5	-0.0769065	0.515678	-0.436303	0.663216	0.867765
ENSG00000064218	DMRT3	0.148865	1.46799	0.602522	0.547696	0.806716
ENSG00000064225	ST3GAL6	0.0731899	4.82655	0.400353	0.68944	0.880173
ENSG00000064270	ATP2C2	0.012863	5.79685	0.0544774	0.956624	0.987013
ENSG00000064300	NGFR	-0.183229	-0.292225	-0.734577	0.463693	0.756498
ENSG00000064309	CDON	-0.110224	2.40173	-0.566884	0.571602	0.82181
ENSG00000064313	TAF2	0.0550421	4.42407	0.466153	0.641752	0.857681
ENSG00000064393	HIPK2	-0.197085	4.58996	-1.75036	0.0820084	0.351786
ENSG00000064419	TNPO3	-0.0644525	3.76012	-0.603941	0.546755	0.806058
ENSG00000064489	BORCS8-MEF2B	-0.258733	1.83123	-0.921458	0.358225	0.681093
ENSG00000064490	RFXANK	0.410856	4.17403	2.76421	0.00638908	0.0896864
ENSG00000064545	TMEM161A	0.174068	1.50932	0.848547	0.397425	0.711604
ENSG00000064547	LPAR2	-0.627447	3.44747	-2.2475	0.0260007	0.189953
ENSG00000064601	CTSA	-0.188293	5.47828	-1.69323	0.0923938	0.371532
ENSG00000064607	SUGP2	0.0500464	4.25546	0.440525	0.660163	0.866235
ENSG00000064651	SLC12A2	-0.110362	4.61431	-0.646812	0.518698	0.790726
ENSG00000064652	SNX24	0.144723	4.32686	0.808807	0.41985	0.729408
ENSG00000064655	EYA2	-0.210188	5.13685	-0.975446	0.330839	0.660343
ENSG00000064666	CNN2	-0.24739	6.29299	-1.46537	0.14482	0.460944
ENSG00000064687	ABCA7	-0.0196398	4.88643	-0.118964	0.905456	0.972853
ENSG00000064692	SNCAIP	-0.0306173	3.39099	-0.14561	0.884416	0.964323
ENSG00000064703	DDX20	0.0277088	2.29563	0.222463	0.824242	0.939574
ENSG00000064726	BTBD1	0.217998	6.53689	1.79278	0.0749331	0.333941
ENSG00000064763	FAR2	-0.0356676	4.53094	-0.261556	0.794006	0.927486
ENSG00000064787	BCAS1	0.0663251	4.66399	0.396584	0.692213	0.882142
ENSG00000064886	CHI3L2	0.153777	2.32968	0.622232	0.534692	0.798569
ENSG00000064932	SBNO2	-0.229428	5.92446	-1.00033	0.318687	0.650445
ENSG00000064933	PMS1	-0.110908	3.9241	-0.763711	0.446186	0.744965
ENSG00000064961	HMG20B	0.0262128	4.37837	0.222006	0.824598	0.939609
ENSG00000064989	CALCRL	0.077103	1.06571	0.327345	0.743843	0.905076
ENSG00000064995	TAF11	-0.0876921	3.21774	-0.750768	0.453916	0.749843
ENSG00000064999	ANKS1A	0.000664445	4.14629	0.00723252	0.994239	0.998087
ENSG00000065000	AP3D1	-0.169371	5.26505	-2.1921	0.0298439	0.205828
ENSG00000065029	ZNF76	-0.11836	3.6195	-0.797088	0.426603	0.734186
ENSG00000065054	SLC9A3R2	0.174967	5.07547	0.881163	0.379576	0.69725
ENSG00000065057	NTHL1	0.225039	2.20315	0.948572	0.344296	0.671211
ENSG00000065060	UHRF1BP1	0.218201	2.23972	1.91082	0.0578495	0.2949
ENSG00000065135	GNAI3	-0.393364	3.53858	-2.71089	0.00745709	0.0981171
ENSG00000065150	IPO5	-0.189112	5.04267	-1.37916	0.169807	0.494876
ENSG00000065154	OAT	0.0462702	5.85315	0.306104	0.759931	0.911859
ENSG00000065183	WDR3	0.0843452	2.68008	0.55611	0.578927	0.82585
ENSG00000065243	PKN2	0.180715	4.98253	1.4612	0.145957	0.462514
ENSG00000065268	WDR18	-0.137571	2.98716	-0.734985	0.463445	0.756314
ENSG00000065308	TRAM2	-0.216171	1.11746	-1.59499	0.112725	0.410248
ENSG00000065320	NTN1	-0.171506	3.2596	-0.874838	0.382998	0.700165
ENSG00000065328	MCM10	0.119571	0.137368	0.640885	0.522532	0.792109
ENSG00000065357	DGKA	0.0600846	5.92617	0.496013	0.620578	0.848112
ENSG00000065361	ERBB3	-0.207376	6.25102	-1.15129	0.251362	0.585373
ENSG00000065413	ANKRD44	-0.024178	5.19287	-0.0841968	0.933007	0.980448
ENSG00000065427	KARS1	0.451232	5.38143	3.49787	0.000610189	0.0206092
ENSG00000065457	ADAT1	-0.028902	5.08547	-0.231443	0.817272	0.935685
ENSG00000065485	PDIA5	-0.0928814	2.31408	-0.46027	0.645959	0.859411
ENSG00000065491	TBC1D22B	0.0669691	2.40464	0.536071	0.592668	0.832946
ENSG00000065518	NDUFB4	0.0351569	6.26485	0.217612	0.828014	0.940872
ENSG00000065526	SPEN	-0.199356	4.69014	-2.50089	0.013414	0.137211
ENSG00000065534	MYLK	0.125239	3.27258	0.704726	0.482025	0.767695
ENSG00000065548	ZC3H15	0.37452	4.79015	3.41319	0.000816867	0.0249216
ENSG00000065559	MAP2K4	0.044564	5.05302	0.378088	0.705876	0.887649
ENSG00000065600	PACC1	0.0226178	1.97549	0.101127	0.919579	0.976758
ENSG00000065613	SLK	-0.117314	5.55398	-1.02056	0.30903	0.641804
ENSG00000065615	CYB5R4	-0.18298	4.43361	-1.23489	0.218715	0.552463
ENSG00000065618	COL17A1	-0.410299	1.87303	-1.86349	0.0642606	0.31082
ENSG00000065621	GSTO2	-0.587174	4.09518	-2.69332	0.00784298	0.101078
ENSG00000065665	SEC61A2	-0.250982	3.14869	-1.14559	0.253708	0.588248
ENSG00000065675	PRKCQ	0.212029	0.858174	0.730985	0.465878	0.758024
ENSG00000065717	TLE2	0.118237	3.58128	0.626016	0.532213	0.797511
ENSG00000065802	ASB1	-0.180675	3.13149	-1.1639	0.246231	0.580872
ENSG00000065809	FAM107B	-0.193349	8.05436	-1.86009	0.0647427	0.311718
ENSG00000065833	ME1	0.309585	3.11757	1.67334	0.0962518	0.378868
ENSG00000065882	TBC1D1	0.018151	5.95082	0.210246	0.833748	0.94299
ENSG00000065883	CDK13	-0.0495514	5.90245	-0.530822	0.596292	0.834989
ENSG00000065911	MTHFD2	0.381632	3.7369	1.80939	0.0723033	0.328053
ENSG00000065923	SLC9A7	-0.311367	2.17742	-2.01752	0.0453439	0.26074
ENSG00000065970	FOXJ2	-0.25041	2.58592	-1.72003	0.0873977	0.362678
ENSG00000065978	YBX1	-0.228971	6.77212	-1.54578	0.124171	0.431023
ENSG00000065989	PDE4A	-0.16507	2.44549	-1.06953	0.28647	0.619264
ENSG00000066027	PPP2R5A	-0.0188984	4.46448	-0.170485	0.864848	0.956666
ENSG00000066044	ELAVL1	0.106235	4.37524	0.980788	0.328206	0.659296
ENSG00000066056	TIE1	-0.281108	0.0256955	-1.36435	0.174408	0.500444
ENSG00000066084	DIP2B	-0.199289	3.92981	-1.26065	0.209303	0.541409
ENSG00000066117	SMARCD1	0.22974	4.47662	1.89984	0.059287	0.298864
ENSG00000066135	KDM4A	0.0284969	4.82634	0.195387	0.845342	0.948065
ENSG00000066136	NFYC	-0.0506016	4.97188	-0.448386	0.654493	0.863497
ENSG00000066185	ZMYND12	0.58253	2.88209	2.2954	0.0230333	0.17893
ENSG00000066230	SLC9A3	-0.283426	3.33686	-1.26142	0.209026	0.541109
ENSG00000066248	NGEF	-0.122673	1.85583	-0.554504	0.580023	0.826538
ENSG00000066294	CD84	0.483359	2.01526	1.55282	0.122479	0.427876
ENSG00000066322	ELOVL1	0.16904	4.29316	1.27982	0.202496	0.533573
ENSG00000066336	SPI1	0.0301921	5.32298	0.0787299	0.937348	0.982019
ENSG00000066379	ZNRD1	0.412239	2.73294	2.16947	0.0315507	0.212671
ENSG00000066382	MPPED2	-0.153278	1.20633	-0.809187	0.419632	0.729109
ENSG00000066405	CLDN18	-0.172537	1.55307	-0.757288	0.450012	0.747345
ENSG00000066422	ZBTB11	0.185795	3.34273	1.55672	0.121549	0.426139
ENSG00000066427	ATXN3	0.369088	5.1162	2.6058	0.0100475	0.116102
ENSG00000066455	GOLGA5	-0.0174652	4.3125	-0.172924	0.862934	0.955714
ENSG00000066468	FGFR2	0.0083449	3.96312	0.0392828	0.968715	0.990383
ENSG00000066557	LRRC40	0.123749	1.771	0.796604	0.426884	0.734379
ENSG00000066583	ISOC1	-0.048154	2.20017	-0.287545	0.774074	0.918558
ENSG00000066629	EML1	-0.224253	4.5483	-1.30528	0.193707	0.522721
ENSG00000066651	TRMT11	0.407214	3.66569	2.0823	0.0389369	0.238255
ENSG00000066654	THUMPD1	0.0545678	4.40065	0.62629	0.532034	0.797471
ENSG00000066697	MSANTD3	-0.23995	2.6173	-1.32583	0.186821	0.514443
ENSG00000066739	ATG2B	-0.0868637	4.15327	-0.511212	0.609921	0.843761
ENSG00000066777	ARFGEF1	-0.0459446	5.22035	-0.63338	0.527407	0.795233
ENSG00000066813	ACSM2B	-0.143581	3.19223	-0.61981	0.536281	0.799807
ENSG00000066827	ZFAT	-0.242127	2.88758	-1.44357	0.150853	0.469588
ENSG00000066855	MTFR1	0.0651662	5.09805	0.396032	0.692619	0.882374
ENSG00000066923	STAG3	0.206265	5.9223	1.32213	0.188049	0.516141
ENSG00000066926	FECH	0.125068	3.95367	0.846858	0.398363	0.712338
ENSG00000066933	MYO9A	-0.0830249	4.64432	-0.633386	0.527403	0.795233
ENSG00000067048	DDX3Y	-0.0041676	3.33164	-0.00700617	0.994419	0.998089
ENSG00000067057	PFKP	0.0363658	4.96007	0.287363	0.774213	0.918653
ENSG00000067064	IDI1	-0.43181	5.26005	-3.27885	0.0012836	0.0334648
ENSG00000067066	SP100	1.01608	6.93376	7.06435	4.94e-11	1.11e-08
ENSG00000067082	KLF6	-0.385806	5.98899	-2.29593	0.0230026	0.17893
ENSG00000067113	PLPP1	0.279782	3.02449	1.34262	0.181332	0.507156
ENSG00000067141	NEO1	-0.0208127	3.62745	-0.100448	0.920117	0.976758
ENSG00000067167	TRAM1	0.153604	5.60273	1.48853	0.138616	0.452108
ENSG00000067177	PHKA1	0.205127	1.61164	1.49595	0.136673	0.449843
ENSG00000067182	TNFRSF1A	-0.489171	6.20058	-2.34978	0.0200284	0.168394
ENSG00000067191	CACNB1	-0.287154	3.21835	-1.20339	0.230635	0.566636
ENSG00000067208	EVI5	0.120903	5.09371	0.78289	0.434871	0.737968
ENSG00000067221	STOML1	0.304465	2.12123	1.70113	0.0908986	0.36909
ENSG00000067225	PKM	-0.176549	7.75941	-1.63905	0.103204	0.391323
ENSG00000067248	DHX29	-0.0158845	3.76918	-0.120945	0.903889	0.972381
ENSG00000067334	DNTTIP2	-0.169967	5.23317	-1.30471	0.193901	0.522721
ENSG00000067365	METTL22	-0.250495	4.30817	-1.31287	0.191142	0.519386
ENSG00000067369	TP53BP1	0.208656	5.11228	1.6466	0.101641	0.387804
ENSG00000067445	TRO	1.50233	1.41687	5.74198	4.7e-08	6.45e-06
ENSG00000067533	RRP15	0.0162699	1.69832	0.0854842	0.931985	0.980395
ENSG00000067560	RHOA	-0.233035	7.66974	-2.86251	0.0047767	0.0758741
ENSG00000067596	DHX8	0.0695867	4.72702	0.659003	0.510859	0.786585
ENSG00000067606	PRKCZ	-0.340888	4.65592	-2.48738	0.0139137	0.139561
ENSG00000067646	ZFY	-0.232326	0.502644	-0.52124	0.602934	0.838791
ENSG00000067704	IARS2	-0.0643657	4.28886	-0.401692	0.688457	0.87981
ENSG00000067798	NAV3	0.0683017	4.68931	0.259061	0.795927	0.927757
ENSG00000067829	IDH3G	0.155619	4.45241	1.43073	0.154494	0.474462
ENSG00000067836	ROGDI	-0.0196096	4.38633	-0.124719	0.900905	0.971535
ENSG00000067900	ROCK1	0.100582	5.67223	0.855315	0.39368	0.708282
ENSG00000067955	CBFB	-0.0612809	4.80393	-0.578604	0.563685	0.816737
ENSG00000067992	PDK3	-0.286928	2.91162	-2.07305	0.039801	0.241262
ENSG00000068001	HYAL2	-0.0320268	1.79548	-0.168862	0.866123	0.957549
ENSG00000068024	HDAC4	-0.0342151	5.00289	-0.169517	0.865608	0.957182
ENSG00000068028	RASSF1	0.00382429	2.04867	0.0214993	0.982875	0.994327
ENSG00000068078	FGFR3	-0.441241	3.31359	-1.48949	0.138364	0.451802
ENSG00000068079	IFI35	1.71536	4.53514	10.1012	8.51e-19	5.37e-16
ENSG00000068097	HEATR6	0.218732	3.65281	1.38646	0.167571	0.491347
ENSG00000068120	COASY	-0.00189903	4.29528	-0.0167311	0.986672	0.995827
ENSG00000068137	PLEKHH3	-0.130284	2.86121	-0.680835	0.496979	0.778281
ENSG00000068305	MEF2A	0.148907	5.41474	1.57504	0.117259	0.418878
ENSG00000068308	OTUD5	-0.0016636	4.51298	-0.0135363	0.989217	0.99661
ENSG00000068323	TFE3	-0.427862	3.90543	-2.38323	0.0183565	0.160665
ENSG00000068354	TBC1D25	-0.299198	2.4146	-1.7924	0.0749943	0.333941
ENSG00000068366	ACSL4	-0.150694	4.34344	-0.780403	0.436329	0.739162
ENSG00000068383	INPP5A	-0.521509	3.17058	-2.33509	0.0208038	0.171263
ENSG00000068394	GPKOW	0.280132	2.4065	1.8412	0.0674787	0.317834
ENSG00000068400	GRIPAP1	0.0143852	4.73091	0.123806	0.901627	0.971572
ENSG00000068438	FTSJ1	-0.0722321	3.57269	-0.481648	0.630727	0.853139
ENSG00000068489	PRR11	-0.228314	2.23562	-1.42844	0.15515	0.475458
ENSG00000068615	REEP1	-0.131236	0.853559	-0.563383	0.573978	0.823181
ENSG00000068650	ATP11A	-0.379389	4.90651	-1.76766	0.0790606	0.344291
ENSG00000068654	POLR1A	0.241406	3.39497	1.65034	0.100872	0.386648
ENSG00000068697	LAPTM4A	0.0888688	6.15131	0.902163	0.368352	0.688716
ENSG00000068724	TTC7A	-0.0244137	4.08834	-0.235976	0.813759	0.935049
ENSG00000068745	IP6K2	0.151727	5.51404	1.451	0.148774	0.466776
ENSG00000068784	SRBD1	0.13121	3.58735	0.733953	0.464072	0.756882
ENSG00000068796	KIF2A	0.194551	5.63455	1.44002	0.151853	0.471236
ENSG00000068831	RASGRP2	-0.189237	2.62445	-0.509757	0.610937	0.844376
ENSG00000068878	PSME4	-0.0695476	5.41267	-0.748139	0.455495	0.750774
ENSG00000068885	IFT80	0.102708	5.83548	0.677	0.499402	0.779908
ENSG00000068903	SIRT2	-0.0604323	5.40651	-0.748939	0.455014	0.750412
ENSG00000068912	ERLEC1	0.400936	4.70715	3.50672	0.000591668	0.0200696
ENSG00000068971	PPP2R5B	0.0836403	2.62065	0.545037	0.586501	0.829758
ENSG00000068976	PYGM	-0.202419	2.50685	-0.594324	0.553151	0.809462
ENSG00000069011	PITX1	-0.299365	4.91557	-1.50223	0.135046	0.44741
ENSG00000069020	MAST4	0.177047	5.07793	1.20398	0.230409	0.566345
ENSG00000069122	ADGRF5	0.757473	0.795388	3.40495	0.000840156	0.0254842
ENSG00000069188	SDK2	0.415172	1.65095	1.24462	0.215125	0.547727
ENSG00000069248	NUP133	-0.125287	3.96558	-0.935407	0.351015	0.676389
ENSG00000069275	NUCKS1	0.156773	4.99741	0.914694	0.361755	0.684633
ENSG00000069329	VPS35	-0.164258	5.49061	-1.43808	0.1524	0.471563
ENSG00000069345	DNAJA2	0.00162862	5.0297	0.0209567	0.983307	0.994355
ENSG00000069399	BCL3	-0.253856	6.09622	-1.03568	0.301945	0.634603
ENSG00000069424	KCNAB2	-0.110447	4.62446	-0.536622	0.592288	0.832783
ENSG00000069431	ABCC9	-0.433609	1.94427	-2.7313	0.00703053	0.0945376
ENSG00000069493	CLEC2D	0.389115	5.14621	2.02892	0.0441551	0.257068
ENSG00000069509	FUNDC1	0.340842	2.71184	1.7381	0.0841531	0.356048
ENSG00000069535	MAOB	0.0170623	2.82746	0.0722075	0.942529	0.98369
ENSG00000069667	RORA	0.181072	4.58617	1.53308	0.127269	0.436129
ENSG00000069696	DRD4	-0.400993	1.74981	-1.31946	0.188935	0.517393
ENSG00000069702	TGFBR3	0.179087	2.67714	0.84721	0.398167	0.712132
ENSG00000069764	PLA2G10	0.271623	4.11024	1.51729	0.131203	0.440917
ENSG00000069812	HES2	-0.288078	1.84779	-1.62474	0.106223	0.396933
ENSG00000069849	ATP1B3	-0.300055	5.58121	-1.79474	0.0746187	0.33345
ENSG00000069869	NEDD4	-0.35261	7.81588	-1.82119	0.0704806	0.323775
ENSG00000069943	PIGB	0.0510382	5.40904	0.246699	0.805463	0.930973
ENSG00000069956	MAPK6	-0.0599947	5.14996	-0.57929	0.563224	0.816329
ENSG00000069966	GNB5	-0.0834466	3.66346	-0.711782	0.477656	0.765041
ENSG00000069974	RAB27A	-0.0909217	5.14218	-0.622756	0.534348	0.798378
ENSG00000069998	HDHD5	-0.214054	2.0114	-1.24275	0.215813	0.548593
ENSG00000070010	UFD1	-0.0570803	4.56073	-0.501405	0.616788	0.846849
ENSG00000070018	LRP6	-0.1542	2.54935	-0.853756	0.394541	0.708657
ENSG00000070019	GUCY2C	-0.0766991	1.11451	-0.497237	0.619717	0.848065
ENSG00000070031	SCT	0.0953072	-0.00702598	0.40069	0.689193	0.880065
ENSG00000070047	PHRF1	0.268393	3.7577	1.94886	0.0530945	0.283169
ENSG00000070061	ELP1	0.00255124	3.85069	0.0164697	0.986881	0.995846
ENSG00000070081	NUCB2	0.453598	7.68537	2.27284	0.0243918	0.18275
ENSG00000070087	PFN2	-0.0264066	6.58931	-0.19157	0.848327	0.949501
ENSG00000070159	PTPN3	-0.0875002	5.5908	-0.714607	0.475913	0.764241
ENSG00000070182	SPTB	-0.469555	1.09642	-2.18947	0.0300384	0.206761
ENSG00000070190	DAPP1	0.430918	5.13469	3.24966	0.0014135	0.0355584
ENSG00000070214	SLC44A1	0.136888	2.75713	0.996302	0.320636	0.652482
ENSG00000070269	TMEM260	0.142447	4.45228	0.944065	0.346586	0.67266
ENSG00000070366	SMG6	0.00213139	4.5757	0.0188204	0.985008	0.994823
ENSG00000070367	EXOC5	0.259138	4.70105	2.26212	0.0250618	0.186199
ENSG00000070371	CLTCL1	-0.0581725	1.39411	-0.280947	0.779121	0.921359
ENSG00000070404	FSTL3	-0.146168	0.0244362	-0.654026	0.514052	0.788499
ENSG00000070413	DGCR2	-0.028623	3.92523	-0.258573	0.796303	0.927766
ENSG00000070423	RNF126	0.0366404	3.83781	0.297765	0.766276	0.915103
ENSG00000070444	MNT	-0.575713	4.09205	-3.42573	0.000782598	0.024321
ENSG00000070476	ZXDC	-0.297105	3.68752	-3.26295	0.00135293	0.0344746
ENSG00000070495	JMJD6	-0.360573	4.22084	-1.81111	0.0720341	0.327622
ENSG00000070501	POLB	-0.0981284	5.36431	-0.722648	0.470971	0.760178
ENSG00000070526	ST6GALNAC1	-0.0177874	5.85359	-0.102077	0.918826	0.976741
ENSG00000070540	WIPI1	-0.204012	5.3618	-1.88289	0.0615645	0.303456
ENSG00000070601	FRMPD1	-0.245268	0.875473	-0.95782	0.339626	0.666222
ENSG00000070610	GBA2	0.0923794	4.80256	0.909289	0.364591	0.686444
ENSG00000070614	NDST1	-0.204842	3.8436	-1.48386	0.13985	0.453852
ENSG00000070669	ASNS	0.184983	3.53403	1.06149	0.290097	0.623913
ENSG00000070718	AP3M2	0.0514914	3.76662	0.270879	0.78684	0.924759
ENSG00000070729	CNGB1	-0.551027	1.85231	-1.53305	0.127275	0.436129
ENSG00000070731	ST6GALNAC2	-0.223333	5.08859	-1.27164	0.205382	0.537144
ENSG00000070748	CHAT	-0.0746521	-0.182052	-0.38056	0.704044	0.887184
ENSG00000070756	PABPC1	-0.443457	8.57253	-3.675	0.000325911	0.0132149
ENSG00000070759	TESK2	-0.261045	2.10579	-1.5032	0.134797	0.44741
ENSG00000070761	CFAP20	0.228246	4.40105	1.49576	0.136724	0.449843
ENSG00000070770	CSNK2A2	0.0942298	4.383	0.899442	0.369795	0.689941
ENSG00000070778	PTPN21	0.208847	3.19904	1.03301	0.303189	0.635763
ENSG00000070785	EIF2B3	0.259065	3.77459	1.64054	0.102894	0.391323
ENSG00000070814	TCOF1	-0.432027	3.76288	-2.81751	0.00546212	0.0819886
ENSG00000070831	CDC42	0.0681898	7.40528	0.917997	0.360028	0.683031
ENSG00000070882	OSBPL3	-0.251389	5.82244	-1.69155	0.0927157	0.372303
ENSG00000070950	RAD18	0.17476	2.53567	0.942207	0.347534	0.67344
ENSG00000070961	ATP2B1	-0.587454	5.3004	-2.66688	0.00845785	0.105378
ENSG00000071051	NCK2	-0.091353	4.6374	-0.806849	0.420973	0.73035
ENSG00000071054	MAP4K4	-0.469148	5.4249	-2.82719	0.00530758	0.0806469
ENSG00000071073	MGAT4A	0.443754	3.73087	2.51328	0.0129697	0.135388
ENSG00000071082	RPL31	0.047543	8.24039	0.297564	0.766429	0.915103
ENSG00000071127	WDR1	-0.325265	6.96806	-3.51902	0.000566839	0.0194976
ENSG00000071189	SNX13	0.156621	4.99475	1.54435	0.124516	0.431646
ENSG00000071205	ARHGAP10	-0.437291	2.08713	-2.01007	0.046136	0.262614
ENSG00000071242	RPS6KA2	-0.072539	3.53291	-0.528276	0.598054	0.83639
ENSG00000071243	ING3	0.253564	3.22498	1.74903	0.08224	0.352205
ENSG00000071246	VASH1	0.302548	2.06693	1.08116	0.281282	0.614721
ENSG00000071282	LMCD1	-0.433729	1.71371	-1.96649	0.0510048	0.276881
ENSG00000071462	BUD23	0.227344	5.14346	1.69681	0.0917136	0.371049
ENSG00000071537	SEL1L	-0.18161	4.48336	-1.56474	0.119657	0.423446
ENSG00000071539	TRIP13	0.0464844	2.63834	0.208633	0.835005	0.943718
ENSG00000071553	ATP6AP1	-0.0875487	5.08423	-0.82369	0.411365	0.722828
ENSG00000071564	TCF3	0.0364689	4.35666	0.236606	0.813271	0.934829
ENSG00000071575	TRIB2	0.469906	4.35937	2.98514	0.0032886	0.0607642
ENSG00000071626	DAZAP1	-0.107805	5.09143	-1.00378	0.317031	0.649082
ENSG00000071655	MBD3	0.0662303	3.844	0.4954	0.62101	0.848112
ENSG00000071794	HLTF	-0.143266	3.78366	-0.984025	0.326617	0.657863
ENSG00000071859	FAM50A	0.166556	3.9741	1.16785	0.244638	0.578946
ENSG00000071889	FAM3A	-0.0429193	3.57066	-0.309752	0.75716	0.910936
ENSG00000071894	CPSF1	-0.124587	4.45382	-0.925583	0.356083	0.68018
ENSG00000071909	MYO3B	-0.178742	0.172429	-0.84102	0.401616	0.714734
ENSG00000071967	CYBRD1	-0.529467	2.83494	-2.89927	0.00427625	0.071149
ENSG00000071991	CDH19	-0.174007	0.600803	-0.641271	0.522281	0.791881
ENSG00000071994	PDCD2	0.0903917	4.33627	0.566409	0.571924	0.821958
ENSG00000072041	SLC6A15	-0.610886	-0.387386	-2.17373	0.0312229	0.212002
ENSG00000072042	RDH11	0.0497212	3.26014	0.404936	0.686075	0.87858
ENSG00000072062	PRKACA	-0.34444	4.48473	-3.08138	0.00243373	0.0503457
ENSG00000072071	ADGRL1	0.113101	2.22417	0.57188	0.568221	0.81992
ENSG00000072080	SPP2	0.0594042	3.9856	0.165036	0.869128	0.958362
ENSG00000072110	ACTN1	-0.352114	5.91991	-1.92422	0.0561349	0.290491
ENSG00000072121	ZFYVE26	0.391489	4.11204	3.05873	0.00261405	0.0526741
ENSG00000072133	RPS6KA6	-0.0333978	2.64084	-0.110038	0.91252	0.974685
ENSG00000072134	EPN2	-0.123272	5.12739	-1.07719	0.283046	0.615707
ENSG00000072135	PTPN18	-0.0839983	4.99664	-0.682388	0.495999	0.777839
ENSG00000072163	LIMS2	0.415779	-0.278411	1.57185	0.117998	0.420422
ENSG00000072195	SPEG	-0.099082	0.0209604	-0.691035	0.490564	0.773875
ENSG00000072201	LNX1	-0.187387	4.10928	-0.994847	0.321341	0.653495
ENSG00000072210	ALDH3A2	-0.086881	6.1409	-0.616104	0.538718	0.801093
ENSG00000072274	TFRC	-0.0193024	5.54319	-0.124048	0.901436	0.971572
ENSG00000072310	SREBF1	-0.103966	5.66909	-0.70555	0.481513	0.76755
ENSG00000072364	AFF4	-0.240444	5.76627	-2.45818	0.0150508	0.146391
ENSG00000072401	UBE2D1	-0.411111	4.6868	-2.47021	0.0145727	0.14348
ENSG00000072415	MPP5	0.0110492	4.04499	0.101039	0.919648	0.976758
ENSG00000072422	RHOBTB1	0.112828	2.49062	0.538507	0.59099	0.832139
ENSG00000072501	SMC1A	0.0943602	3.72846	0.708844	0.479472	0.766113
ENSG00000072506	HSD17B10	0.201251	3.99548	1.27356	0.204702	0.536163
ENSG00000072518	MARK2	-0.126492	5.39135	-1.48782	0.138804	0.452273
ENSG00000072571	HMMR	0.282947	0.151592	1.39192	0.165914	0.489478
ENSG00000072609	CHFR	-0.0300314	5.08231	-0.303806	0.761678	0.912706
ENSG00000072657	TRHDE	-0.0403047	0.0739455	-0.210351	0.833666	0.94299
ENSG00000072682	P4HA2	0.0826904	4.46599	0.475877	0.634823	0.855014
ENSG00000072694	FCGR2B	0.441462	2.78478	1.19964	0.232086	0.568409
ENSG00000072736	NFATC3	0.0133843	4.66608	0.129456	0.897163	0.970173
ENSG00000072756	TRNT1	0.125053	4.48762	0.925607	0.356071	0.68018
ENSG00000072778	ACADVL	-0.0331688	6.81249	-0.27128	0.786532	0.924759
ENSG00000072786	STK10	-0.420093	5.5437	-1.54349	0.124725	0.432277
ENSG00000072803	FBXW11	-0.05527	5.33668	-0.464172	0.643167	0.858263
ENSG00000072818	ACAP1	-0.129493	4.71846	-0.669632	0.504076	0.782106
ENSG00000072832	CRMP1	-0.538519	0.170367	-2.66126	0.00859411	0.106068
ENSG00000072840	EVC	-0.25045	1.29036	-1.23426	0.218951	0.552738
ENSG00000072849	DERL2	0.0300673	4.3204	0.215547	0.82962	0.94141
ENSG00000072858	SIDT1	0.646871	4.83988	3.29357	0.00122238	0.0326237
ENSG00000072864	NDE1	-0.186966	4.98988	-1.53439	0.126945	0.435473
ENSG00000072952	MRVI1	-0.178901	2.57502	-0.714674	0.475871	0.764241
ENSG00000072954	TMEM38A	-0.00404081	1.1932	-0.0204614	0.983701	0.994355
ENSG00000072958	AP1M1	-0.00119881	4.13258	-0.00961806	0.992338	0.997757
ENSG00000073008	PVR	-0.0506881	1.58701	-0.318605	0.75045	0.907396
ENSG00000073050	XRCC1	-0.0991062	3.2741	-0.669955	0.503871	0.782042
ENSG00000073060	SCARB1	-0.282836	2.37855	-1.6176	0.107755	0.400288
ENSG00000073067	CYP2W1	0.103042	0.723633	0.480903	0.631255	0.853408
ENSG00000073111	MCM2	0.299117	2.06929	1.56032	0.120698	0.424562
ENSG00000073150	PANX2	-0.482917	2.6278	-2.61109	0.00989992	0.115326
ENSG00000073169	SELENOO	0.105475	2.91609	0.715449	0.475394	0.764038
ENSG00000073282	TP63	-0.112876	2.30916	-0.353423	0.724246	0.895769
ENSG00000073331	ALPK1	0.205025	5.70188	1.19451	0.234079	0.56922
ENSG00000073350	LLGL2	-0.105798	5.64557	-0.750334	0.454176	0.749893
ENSG00000073417	PDE8A	-0.0832693	4.6229	-0.530556	0.596476	0.835098
ENSG00000073464	CLCN4	0.193134	0.528083	1.19804	0.232706	0.568779
ENSG00000073536	NLE1	-0.11175	1.35509	-0.648289	0.517745	0.790726
ENSG00000073578	SDHA	0.0639784	6.76743	0.451777	0.652053	0.862242
ENSG00000073584	SMARCE1	0.0748589	5.0455	0.730258	0.466321	0.758327
ENSG00000073605	GSDMB	1.16856	4.13344	6.40249	1.68e-09	3.2e-07
ENSG00000073614	KDM5A	-0.00771208	5.34844	-0.0619876	0.950652	0.985646
ENSG00000073711	PPP2R3A	-0.429193	2.84408	-2.98501	0.00328996	0.0607642
ENSG00000073712	FERMT2	0.100798	2.71763	0.499715	0.617975	0.847381
ENSG00000073734	ABCB11	-0.00257428	3.63686	-0.0115836	0.990773	0.996974
ENSG00000073737	DHRS9	0.302472	6.74159	1.8907	0.0605063	0.301137
ENSG00000073756	PTGS2	-0.702584	5.71899	-1.63337	0.104395	0.393425
ENSG00000073792	IGF2BP2	0.0703728	5.35874	0.365501	0.715229	0.89265
ENSG00000073803	MAP3K13	0.07777	5.46235	0.793595	0.428629	0.73493
ENSG00000073849	ST6GAL1	0.296898	5.96936	1.93344	0.0549803	0.287821
ENSG00000073861	TBX21	0.626317	-0.106115	2.30096	0.0227088	0.178201
ENSG00000073910	FRY	-0.448337	3.18226	-1.86202	0.0644688	0.311342
ENSG00000073921	PICALM	-0.428738	7.71509	-2.82726	0.00530648	0.0806469
ENSG00000073969	NSF	0.268283	4.97654	2.27476	0.0242739	0.18256
ENSG00000074047	GLI2	0.45878	1.25774	1.58016	0.116083	0.41707
ENSG00000074054	CLASP1	0.261669	5.25195	2.31306	0.0220171	0.175625
ENSG00000074071	MRPS34	-0.11662	3.42654	-0.587176	0.557929	0.812652
ENSG00000074181	NOTCH3	-0.412939	2.66112	-2.20823	0.0286776	0.201934
ENSG00000074201	CLNS1A	0.163262	5.77956	1.0363	0.301656	0.634519
ENSG00000074266	EED	0.209815	3.73799	1.69305	0.0924296	0.371532
ENSG00000074276	CDHR2	0.0818369	0.452394	0.372756	0.709833	0.889771
ENSG00000074319	TSG101	0.134241	5.57418	1.10211	0.272102	0.606981
ENSG00000074356	NCBP3	-0.0515938	4.22689	-0.394193	0.693973	0.88314
ENSG00000074370	ATP2A3	-0.226167	5.34582	-1.36734	0.173471	0.498813
ENSG00000074410	CA12	0.0479666	3.87191	0.1883	0.850885	0.950361
ENSG00000074416	MGLL	-0.017641	5.36683	-0.127128	0.899002	0.97096
ENSG00000074527	NTN4	0.107284	4.05687	0.533412	0.594503	0.834222
ENSG00000074582	BCS1L	-0.0513278	3.21469	-0.23832	0.811943	0.933711
ENSG00000074590	NUAK1	0.00554457	1.25496	0.0230037	0.981676	0.994274
ENSG00000074603	DPP8	0.0821435	4.2306	0.824472	0.410922	0.722652
ENSG00000074621	SLC24A1	0.209173	4.22443	1.29796	0.196205	0.525958
ENSG00000074657	ZNF532	0.232501	4.77725	1.86395	0.0641961	0.310603
ENSG00000074660	SCARF1	-0.665013	2.82382	-1.94018	0.0541487	0.285553
ENSG00000074695	LMAN1	0.316564	4.88668	2.00975	0.0461702	0.262619
ENSG00000074696	HACD3	0.131535	4.86355	1.08849	0.278047	0.612923
ENSG00000074706	IPCEF1	0.388555	3.0005	1.46956	0.143682	0.460035
ENSG00000074755	ZZEF1	-0.109682	5.18984	-0.889353	0.375174	0.693756
ENSG00000074800	ENO1	-0.0179051	6.84917	-0.190557	0.849119	0.950003
ENSG00000074842	MYDGF	0.113074	3.71036	0.57486	0.566208	0.818289
ENSG00000074855	ANO8	-0.376781	1.48467	-1.93842	0.0543655	0.285836
ENSG00000074935	TUBE1	0.165031	4.56018	1.14792	0.252745	0.586971
ENSG00000074964	ARHGEF10L	-0.101518	3.54383	-0.630043	0.529582	0.795668
ENSG00000074966	TXK	0.171478	1.76144	0.688642	0.492064	0.775048
ENSG00000075073	TACR2	-0.0348471	1.98718	-0.182131	0.855715	0.951942
ENSG00000075089	ACTR6	0.151014	4.73469	1.01879	0.309868	0.64265
ENSG00000075131	TIPIN	-0.178319	2.46264	-1.10961	0.268865	0.604134
ENSG00000075142	SRI	0.299504	6.28501	1.8998	0.0592918	0.298864
ENSG00000075151	EIF4G3	0.00267163	6.03149	0.0239284	0.98094	0.994113
ENSG00000075188	NUP37	0.385024	3.50019	2.30985	0.0221987	0.176091
ENSG00000075213	SEMA3A	0.545074	3.0475	2.67345	0.00830112	0.104247
ENSG00000075218	GTSE1	-0.0687456	1.50117	-0.44781	0.654907	0.863497
ENSG00000075223	SEMA3C	0.150624	5.40898	0.825884	0.410123	0.722052
ENSG00000075234	TTC38	0.192053	4.06227	1.11676	0.265801	0.6007
ENSG00000075239	ACAT1	0.237054	5.372	1.95978	0.0517916	0.279453
ENSG00000075240	GRAMD4	-0.0768296	4.05148	-0.420382	0.674781	0.873638
ENSG00000075275	CELSR1	0.0235689	4.66986	0.114925	0.908651	0.97387
ENSG00000075292	ZNF638	0.132622	6.84121	1.22797	0.221296	0.556011
ENSG00000075303	SLC25A40	-0.36276	4.04559	-2.59135	0.0104609	0.118961
ENSG00000075336	TIMM21	0.195352	2.70114	1.08157	0.2811	0.614608
ENSG00000075340	ADD2	-0.199922	1.33241	-0.957134	0.339971	0.666462
ENSG00000075391	RASAL2	-0.0309632	4.10492	-0.195637	0.845147	0.948065
ENSG00000075399	VPS9D1	-0.405045	4.52076	-1.4859	0.139311	0.453249
ENSG00000075407	ZNF37A	0.0124887	4.18747	0.117838	0.906347	0.972974
ENSG00000075413	MARK3	-0.0796415	6.08372	-0.757172	0.450082	0.747356
ENSG00000075415	SLC25A3	-0.306508	6.698	-3.04249	0.00275086	0.0541276
ENSG00000075420	FNDC3B	-0.224569	6.79505	-1.2577	0.210368	0.542977
ENSG00000075426	FOSL2	-0.783535	5.5891	-3.73576	0.000261463	0.0111461
ENSG00000075539	FRYL	0.196233	5.82875	1.53041	0.127928	0.436661
ENSG00000075568	TMEM131	0.122154	5.50284	0.874871	0.38298	0.700165
ENSG00000075618	FSCN1	-0.544146	2.39661	-2.31892	0.0216882	0.174179
ENSG00000075624	ACTB	-0.417353	10.6345	-2.51791	0.0128072	0.134583
ENSG00000075643	MOCOS	0.153182	2.04566	0.916977	0.360561	0.683839
ENSG00000075651	PLD1	-0.0361788	5.34129	-0.225639	0.821775	0.938022
ENSG00000075673	ATP12A	0.473274	3.59499	1.98386	0.0490148	0.271648
ENSG00000075702	WDR62	0.024055	1.19978	0.143773	0.885864	0.964857
ENSG00000075711	DLG1	-0.00899942	6.14788	-0.0713637	0.943199	0.983806
ENSG00000075785	RAB7A	-0.30929	6.85627	-2.94618	0.00370742	0.0663758
ENSG00000075790	BCAP29	0.382054	4.03584	2.40433	0.0173664	0.157244
ENSG00000075826	SEC31B	-0.0236053	1.40436	-0.122664	0.90253	0.971714
ENSG00000075856	SART3	0.125579	4.80408	1.11695	0.265722	0.600658
ENSG00000075884	ARHGAP15	-0.288319	5.38063	-0.939276	0.349031	0.674335
ENSG00000075886	TUBA3D	0.148819	0.601665	0.585915	0.558774	0.813078
ENSG00000075914	EXOSC7	0.304959	3.70051	1.92926	0.0555022	0.289145
ENSG00000075945	KIFAP3	0.349346	3.71248	1.95317	0.0525774	0.281837
ENSG00000075975	MKRN2	0.0193188	3.14318	0.159923	0.873147	0.959665
ENSG00000076003	MCM6	0.265312	1.36227	1.17755	0.240757	0.575455
ENSG00000076043	REXO2	0.0137248	4.95633	0.0826379	0.934245	0.981277
ENSG00000076053	RBM7	0.264406	3.92985	1.85071	0.0660905	0.314627
ENSG00000076067	RBMS2	0.739108	4.95477	4.65156	6.95e-06	0.00058002
ENSG00000076108	BAZ2A	-0.0754707	6.05722	-0.899363	0.369836	0.689941
ENSG00000076201	PTPN23	-0.0139644	3.62396	-0.102883	0.918187	0.976719
ENSG00000076242	MLH1	0.119777	4.47588	1.35703	0.17672	0.503813
ENSG00000076248	UNG	0.00963344	2.15125	0.055077	0.956147	0.987013
ENSG00000076258	FMO4	0.200709	2.53443	0.947401	0.34489	0.67135
ENSG00000076321	KLHL20	0.311088	3.32583	2.43373	0.0160657	0.151334
ENSG00000076351	SLC46A1	0.0532791	2.94027	0.338112	0.735731	0.901006
ENSG00000076356	PLXNA2	-0.235708	3.60157	-1.04788	0.296306	0.62991
ENSG00000076382	SPAG5	0.104566	3.13938	0.541889	0.588663	0.831096
ENSG00000076513	ANKRD13A	-0.0414631	5.52214	-0.446546	0.655818	0.863962
ENSG00000076554	TPD52	0.285905	5.31911	1.80009	0.0737653	0.331955
ENSG00000076555	ACACB	-0.113811	4.62589	-0.847762	0.397861	0.711988
ENSG00000076604	TRAF4	-0.0331446	6.40323	-0.219418	0.826609	0.94009
ENSG00000076641	PAG1	0.113171	3.50295	0.276401	0.782603	0.922571
ENSG00000076650	GPATCH1	-0.00156052	2.42738	-0.012711	0.989874	0.996866
ENSG00000076662	ICAM3	-0.92731	3.69035	-2.86166	0.00478898	0.0759925
ENSG00000076685	NT5C2	-0.103015	7.26296	-0.916034	0.361054	0.684072
ENSG00000076706	MCAM	-0.440005	1.82168	-1.59059	0.113712	0.412601
ENSG00000076716	GPC4	0.634524	1.64941	3.15195	0.00194285	0.0440408
ENSG00000076770	MBNL3	0.192882	2.99894	1.26412	0.208062	0.540678
ENSG00000076826	CAMSAP3	-0.301556	2.52041	-1.36502	0.174198	0.5
ENSG00000076864	RAP1GAP	-0.303665	3.4669	-1.46176	0.145805	0.462514
ENSG00000076924	XAB2	-0.0826057	3.13631	-0.793997	0.428395	0.73493
ENSG00000076928	ARHGEF1	0.0857422	5.35012	0.466703	0.641359	0.857519
ENSG00000076944	STXBP2	-0.297904	6.01284	-2.18963	0.0300261	0.206761
ENSG00000076984	MAP2K7	-0.271734	3.37673	-1.99904	0.0473292	0.266235
ENSG00000077044	DGKD	0.0506311	4.4576	0.258756	0.796162	0.927757
ENSG00000077063	CTTNBP2	0.304199	1.0916	1.29216	0.198201	0.528883
ENSG00000077092	RARB	0.00155871	3.4708	0.0100014	0.992033	0.997726
ENSG00000077097	TOP2B	0.0109554	5.42893	0.102138	0.918777	0.976741
ENSG00000077147	TM9SF3	-0.158729	5.90225	-1.5308	0.12783	0.436661
ENSG00000077150	NFKB2	-0.274012	4.91231	-0.966543	0.335258	0.664242
ENSG00000077152	UBE2T	0.646339	0.990618	2.76142	0.00644122	0.0899888
ENSG00000077157	PPP1R12B	0.260818	5.23337	1.80036	0.0737229	0.331953
ENSG00000077232	DNAJC10	0.0197967	5.5622	0.115824	0.90794	0.973814
ENSG00000077235	GTF3C1	0.0498456	4.77771	0.414447	0.679112	0.87542
ENSG00000077238	IL4R	-0.518691	5.55407	-1.80931	0.072316	0.328053
ENSG00000077254	USP33	0.049408	5.98678	0.432086	0.666272	0.868801
ENSG00000077312	SNRPA	-0.0119739	4.41006	-0.0745194	0.940692	0.983139
ENSG00000077327	SPAG6	0.166302	6.18871	0.560045	0.576247	0.824125
ENSG00000077348	EXOSC5	0.0909863	1.38469	0.378193	0.705798	0.887649
ENSG00000077380	DYNC1I2	0.203048	4.91314	1.46083	0.146059	0.462514
ENSG00000077420	APBB1IP	-0.134105	3.95077	-0.364609	0.715894	0.892985
ENSG00000077454	LRCH4	-0.180458	5.32589	-1.68049	0.0948508	0.376438
ENSG00000077458	FAM76B	-0.0100786	4.34644	-0.0703021	0.944043	0.983806
ENSG00000077463	SIRT6	-0.155156	2.62441	-0.835249	0.404846	0.717407
ENSG00000077498	TYR	0.118873	0.489759	0.550894	0.582489	0.827734
ENSG00000077514	POLD3	0.263397	4.91197	2.30552	0.022446	0.176667
ENSG00000077549	CAPZB	-0.203358	6.51866	-1.97736	0.0497509	0.273708
ENSG00000077585	GPR137B	-0.213133	4.2754	-1.72185	0.087066	0.362346
ENSG00000077616	NAALAD2	-0.160906	0.376753	-0.752813	0.45269	0.749122
ENSG00000077684	JADE1	0.0970091	3.98467	0.829099	0.408307	0.720463
ENSG00000077713	SLC25A43	-0.0233867	2.29371	-0.12829	0.898084	0.970437
ENSG00000077721	UBE2A	0.176012	5.19205	1.59945	0.11173	0.408063
ENSG00000077782	FGFR1	-0.0917345	2.63269	-0.362232	0.717666	0.89394
ENSG00000077800	FKBP6	0.0940515	3.06493	0.506638	0.613119	0.845713
ENSG00000077942	FBLN1	-0.0340788	3.99496	-0.242169	0.808965	0.932598
ENSG00000077984	CST7	-0.155556	2.83435	-0.340927	0.733614	0.899692
ENSG00000078018	MAP2	0.0560057	0.760136	0.229883	0.818482	0.936408
ENSG00000078043	PIAS2	-0.142868	4.73974	-1.16364	0.246336	0.580872
ENSG00000078053	AMPH	0.136738	0.0967488	0.482671	0.630002	0.85286
ENSG00000078061	ARAF	-0.00942807	4.07956	-0.0969071	0.922924	0.977043
ENSG00000078070	MCCC1	0.25056	4.16853	1.48753	0.138879	0.452403
ENSG00000078081	LAMP3	1.43714	3.66714	6.95146	9.13e-11	1.97e-08
ENSG00000078098	FAP	1.23542	0.734038	3.11458	0.00219003	0.0469978
ENSG00000078114	NEBL	-0.104097	6.51516	-0.645366	0.519632	0.790762
ENSG00000078124	ACER3	-0.388567	3.45993	-2.5937	0.0103926	0.118527
ENSG00000078140	UBE2K	0.0540301	5.047	0.479251	0.632426	0.853754
ENSG00000078142	PIK3C3	0.173287	5.09928	1.68372	0.094223	0.375238
ENSG00000078177	N4BP2	-0.21963	2.64131	-1.8588	0.0649262	0.312135
ENSG00000078237	TIGAR	0.126034	1.65048	0.573293	0.567266	0.819099
ENSG00000078246	TULP3	-0.0672291	3.43237	-0.414679	0.678943	0.875416
ENSG00000078269	SYNJ2	-0.100532	3.66655	-0.777608	0.43797	0.740186
ENSG00000078295	ADCY2	0.282204	4.24202	1.42284	0.156766	0.477627
ENSG00000078304	PPP2R5C	0.115704	7.01927	1.46194	0.145755	0.462514
ENSG00000078328	RBFOX1	0.187163	2.84768	0.984035	0.326612	0.657863
ENSG00000078369	GNB1	-0.175372	6.62255	-1.64881	0.101185	0.386907
ENSG00000078401	EDN1	-0.220649	0.295282	-0.677463	0.499109	0.779759
ENSG00000078403	MLLT10	0.205576	4.90726	1.30193	0.194847	0.523552
ENSG00000078487	ZCWPW1	-0.353436	3.63768	-1.80994	0.0722173	0.328053
ENSG00000078589	P2RY10	0.0342081	2.89464	0.186565	0.852243	0.950711
ENSG00000078596	ITM2A	0.481567	1.5741	1.96672	0.0509781	0.276881
ENSG00000078618	NRDC	-0.0244224	6.34699	-0.228921	0.819228	0.936483
ENSG00000078668	VDAC3	0.315216	5.42688	2.2813	0.0238744	0.181393
ENSG00000078674	PCM1	0.199856	7.46845	1.14315	0.254715	0.58944
ENSG00000078687	TNRC6C	-0.0111952	3.58869	-0.0916197	0.927117	0.978266
ENSG00000078699	CBFA2T2	0.034852	3.40935	0.359542	0.719673	0.894093
ENSG00000078747	ITCH	-0.0643647	5.60835	-0.725678	0.469116	0.758932
ENSG00000078795	PKD2L2	-0.150584	2.16143	-0.787634	0.432098	0.736331
ENSG00000078804	TP53INP2	-0.735663	5.22748	-4.44682	1.64e-05	0.00124446
ENSG00000078808	SDF4	0.107731	4.75685	0.950271	0.343435	0.670171
ENSG00000078814	MYH7B	-0.000186461	2.50296	-0.000882348	0.999297	0.999677
ENSG00000078898	BPIFB2	-0.100107	0.371031	-0.273737	0.784646	0.923672
ENSG00000078900	TP73	-0.0860448	3.92549	-0.376146	0.707316	0.888127
ENSG00000078902	TOLLIP	-0.350196	4.45371	-3.13924	0.00202388	0.0450216
ENSG00000078967	UBE2D4	0.235518	5.26169	1.22637	0.221897	0.556613
ENSG00000079101	CLUL1	0.256957	-0.0863899	1.16402	0.246183	0.580872
ENSG00000079102	RUNX1T1	-0.126421	-0.300435	-0.47755	0.633634	0.854029
ENSG00000079112	CDH17	-0.246631	1.49805	-1.01907	0.309736	0.642487
ENSG00000079134	THOC1	0.217262	4.42383	1.16844	0.244399	0.578787
ENSG00000079150	FKBP7	0.0804466	1.10748	0.40288	0.687584	0.879655
ENSG00000079156	OSBPL6	0.102892	4.25654	0.490039	0.62479	0.850441
ENSG00000079215	SLC1A3	0.594233	2.43142	1.88027	0.0619235	0.304274
ENSG00000079246	XRCC5	0.0409604	6.12319	0.440011	0.660534	0.866557
ENSG00000079257	LXN	0.482895	4.54691	3.11992	0.00215301	0.0468405
ENSG00000079263	SP140	1.08927	3.69691	3.12701	0.0021048	0.0461096
ENSG00000079277	MKNK1	-0.168636	5.13853	-0.850844	0.396151	0.710137
ENSG00000079308	TNS1	0.123155	5.01264	0.751848	0.453267	0.749431
ENSG00000079313	REXO1	0.0160964	3.76354	0.122122	0.902959	0.97191
ENSG00000079332	SAR1A	-0.0612178	4.75803	-0.643401	0.520902	0.791123
ENSG00000079335	CDC14A	0.100551	5.41551	0.678201	0.498642	0.779464
ENSG00000079337	RAPGEF3	-0.151618	2.91155	-0.817558	0.414848	0.725423
ENSG00000079385	CEACAM1	0.173704	4.53362	0.784267	0.434065	0.737849
ENSG00000079387	SENP1	0.0266443	4.10282	0.213291	0.831376	0.942306
ENSG00000079432	CIC	-0.17713	4.51717	-1.32747	0.186278	0.513728
ENSG00000079435	LIPE	-0.192314	3.16419	-1.11302	0.267402	0.602415
ENSG00000079459	FDFT1	-0.0862578	5.88892	-0.786969	0.432486	0.73657
ENSG00000079462	PAFAH1B3	-0.0752689	2.68765	-0.346785	0.729217	0.897586
ENSG00000079482	OPHN1	-0.410104	3.91465	-3.05838	0.00261691	0.0526741
ENSG00000079616	KIF22	0.160121	3.169	1.07204	0.285347	0.618069
ENSG00000079691	CARMIL1	0.336953	3.80832	2.65517	0.00874372	0.107243
ENSG00000079739	PGM1	-0.234452	3.18895	-1.72881	0.0858079	0.359065
ENSG00000079785	DDX1	0.351487	4.63901	2.10041	0.0372905	0.232372
ENSG00000079805	DNM2	-0.31866	6.60854	-3.00548	0.00308768	0.0585361
ENSG00000079819	EPB41L2	0.161653	3.10096	0.678919	0.498189	0.779287
ENSG00000079841	RIMS1	-0.214017	4.21648	-0.773982	0.440105	0.740951
ENSG00000079950	STX7	0.0161776	4.74335	0.136357	0.891713	0.967464
ENSG00000079974	RABL2B	-0.152548	6.34791	-0.722846	0.47085	0.760178
ENSG00000079999	KEAP1	0.0488157	3.96867	0.434494	0.664526	0.868065
ENSG00000080007	DDX43	0.210353	1.69272	0.843942	0.399985	0.713362
ENSG00000080031	PTPRH	0.113391	2.092	0.443347	0.658125	0.865448
ENSG00000080189	SLC35C2	0.0279015	3.87416	0.246776	0.805404	0.930973
ENSG00000080200	CRYBG3	-0.0993636	2.97876	-0.596149	0.551934	0.809212
ENSG00000080293	SCTR	-0.179302	0.455556	-0.84198	0.40108	0.714263
ENSG00000080298	RFX3	0.23665	6.03528	1.02085	0.308896	0.641804
ENSG00000080345	RIF1	0.142347	4.16497	1.30607	0.193438	0.522721
ENSG00000080371	RAB21	-0.23561	5.29164	-1.49815	0.136102	0.449201
ENSG00000080493	SLC4A4	0.328626	2.23691	1.54124	0.125272	0.433029
ENSG00000080503	SMARCA2	-0.0511088	7.26675	-0.351881	0.725399	0.896454
ENSG00000080511	RDH8	-0.0835805	-0.461254	-0.307122	0.759158	0.911622
ENSG00000080546	SESN1	0.192914	4.94451	1.02818	0.305447	0.638131
ENSG00000080561	MID2	0.217328	2.83357	1.11144	0.268079	0.603345
ENSG00000080572	PIH1D3	0.414786	2.89303	1.72873	0.0858222	0.359065
ENSG00000080603	SRCAP	0.00688863	5.04939	0.0723268	0.942434	0.983656
ENSG00000080608	PUM3	0.23375	3.9899	1.30415	0.194091	0.522779
ENSG00000080709	KCNN2	-0.164248	0.751076	-0.743016	0.458582	0.752285
ENSG00000080802	CNOT4	-0.0683612	4.50839	-0.754091	0.451924	0.748667
ENSG00000080815	PSEN1	-0.176227	5.63191	-1.27135	0.205485	0.537144
ENSG00000080819	CPOX	0.178863	1.83643	1.02046	0.309082	0.641804
ENSG00000080822	CLDND1	0.187677	4.15046	1.23951	0.217006	0.549649
ENSG00000080823	MOK	0.0796057	6.58743	0.374325	0.708668	0.888892
ENSG00000080824	HSP90AA1	0.449778	8.35141	3.15244	0.00193984	0.0440408
ENSG00000080839	RBL1	0.198677	1.73076	1.15665	0.249173	0.583897
ENSG00000080845	DLGAP4	0.0461767	4.97432	0.48841	0.625941	0.851118
ENSG00000080986	NDC80	0.0709518	3.30702	0.318717	0.750365	0.907396
ENSG00000081014	AP4E1	-0.00172201	2.6424	-0.0113369	0.990969	0.996974
ENSG00000081019	RSBN1	-0.218203	3.11521	-1.85879	0.0649283	0.312135
ENSG00000081026	MAGI3	-0.313587	4.14834	-2.49037	0.0138018	0.138748
ENSG00000081041	CXCL2	-0.477556	4.03016	-1.34962	0.179081	0.505761
ENSG00000081059	TCF7	-0.114459	4.168	-0.724435	0.469877	0.759439
ENSG00000081087	OSTM1	-0.149462	4.25549	-1.17705	0.240956	0.575674
ENSG00000081154	PCNP	0.173618	5.53142	1.67659	0.0956118	0.377588
ENSG00000081177	EXD2	0.011811	3.5171	0.0701751	0.944144	0.983806
ENSG00000081181	ARG2	-0.391734	3.07779	-2.07342	0.039766	0.241237
ENSG00000081189	MEF2C	0.0997704	4.11889	0.307333	0.758997	0.911622
ENSG00000081237	PTPRC	0.101744	6.71662	0.307049	0.759213	0.911622
ENSG00000081277	PKP1	-0.687505	1.26702	-2.16645	0.0317845	0.213465
ENSG00000081307	UBA5	0.129987	4.64463	0.840077	0.402143	0.715207
ENSG00000081320	STK17B	0.109474	6.04155	0.679986	0.497515	0.77876
ENSG00000081377	CDC14B	-0.181619	4.63429	-1.06184	0.289941	0.623873
ENSG00000081386	ZNF510	0.33583	2.44187	2.04764	0.0422611	0.250219
ENSG00000081479	LRP2	0.0602842	0.142063	0.286293	0.775031	0.91914
ENSG00000081665	ZNF506	0.0739201	4.8262	0.733683	0.464236	0.756992
ENSG00000081692	JMJD4	0.129216	1.6816	0.725388	0.469294	0.759041
ENSG00000081721	DUSP12	0.0588428	2.95641	0.336381	0.737033	0.901779
ENSG00000081760	AACS	-0.197893	4.52185	-1.43761	0.152534	0.471563
ENSG00000081791	DELE1	-0.11751	4.05817	-1.07926	0.282126	0.615316
ENSG00000081803	CADPS2	-0.0383144	2.87478	-0.189444	0.849989	0.950103
ENSG00000081870	HSPB11	0.448851	5.52147	2.37666	0.018675	0.162558
ENSG00000081913	PHLPP1	0.014075	4.75927	0.0927229	0.926242	0.977624
ENSG00000081923	ATP8B1	-0.0246882	4.58836	-0.187193	0.851751	0.950588
ENSG00000081985	IL12RB2	0.231887	1.28259	0.947681	0.344748	0.67135
ENSG00000082014	SMARCD3	-0.31217	2.61516	-1.53134	0.127698	0.436535
ENSG00000082068	WDR70	0.535963	4.26917	3.15513	0.00192308	0.0437701
ENSG00000082074	FYB1	0.543149	5.34963	1.52855	0.128389	0.436909
ENSG00000082126	MPP4	-0.153157	2.80837	-0.707549	0.480274	0.766791
ENSG00000082146	STRADB	-0.0510485	3.27852	-0.278908	0.780683	0.922125
ENSG00000082153	BZW1	-0.293134	7.12312	-2.59432	0.0103747	0.118492
ENSG00000082196	C1QTNF3	-0.144035	0.852439	-0.661677	0.509148	0.78533
ENSG00000082212	ME2	0.178164	4.54564	2.19178	0.0298677	0.205902
ENSG00000082213	C5orf22	0.11657	3.97602	0.889059	0.375331	0.693788
ENSG00000082258	CCNT2	0.217149	4.7843	1.56927	0.118598	0.421256
ENSG00000082269	FAM135A	0.314967	3.95866	2.45227	0.015291	0.147498
ENSG00000082293	COL19A1	-0.357921	1.58047	-1.83244	0.0687801	0.320304
ENSG00000082397	EPB41L3	0.0960355	3.00837	0.331927	0.740387	0.903559
ENSG00000082438	COBLL1	-0.0778287	4.64102	-0.486455	0.627323	0.85178
ENSG00000082458	DLG3	0.192783	5.10157	1.04788	0.296304	0.62991
ENSG00000082482	KCNK2	-0.170116	0.918605	-0.646925	0.518625	0.790726
ENSG00000082497	SERTAD4	-0.455946	1.82687	-1.85789	0.0650563	0.312508
ENSG00000082512	TRAF5	0.154073	2.6242	0.970558	0.333261	0.662223
ENSG00000082515	MRPL22	0.546106	3.77829	3.22269	0.00154434	0.0376548
ENSG00000082516	GEMIN5	0.0811818	1.36348	0.484848	0.62846	0.852485
ENSG00000082641	NFE2L1	-0.102117	5.65287	-0.790828	0.430237	0.73493
ENSG00000082684	SEMA5B	-0.375824	0.490517	-2.13652	0.0341858	0.221449
ENSG00000082701	GSK3B	-0.270259	4.66586	-2.8545	0.00489274	0.0769413
ENSG00000082781	ITGB5	-0.0524206	3.73621	-0.297681	0.76634	0.915103
ENSG00000082805	ERC1	-0.0532288	4.95646	-0.355921	0.722378	0.895025
ENSG00000082898	XPO1	0.378482	6.38171	3.21597	0.00157863	0.0381897
ENSG00000082996	RNF13	-0.245011	6.48335	-2.16968	0.0315348	0.212671
ENSG00000083067	TRPM3	-0.0375498	0.558019	-0.243031	0.808298	0.932306
ENSG00000083093	PALB2	0.175667	2.30988	1.11985	0.264486	0.599715
ENSG00000083097	DOP1A	0.470663	4.40183	3.01784	0.00297122	0.057083
ENSG00000083099	LYRM2	0.177694	4.8424	1.34008	0.182155	0.50825
ENSG00000083123	BCKDHB	0.194971	2.75535	1.19797	0.232733	0.568779
ENSG00000083168	KAT6A	-0.222626	5.32049	-1.7434	0.0832213	0.354669
ENSG00000083223	TUT7	-0.120455	5.34529	-0.812375	0.417806	0.727861
ENSG00000083290	ULK2	0.0373419	4.0991	0.21015	0.833823	0.94299
ENSG00000083307	GRHL2	-0.123666	5.39701	-0.595638	0.552274	0.809258
ENSG00000083312	TNPO1	-0.0708687	5.68852	-0.742082	0.459146	0.752584
ENSG00000083444	PLOD1	-0.26311	2.79316	-1.66794	0.0973203	0.380347
ENSG00000083454	P2RX5	0.775777	0.63214	2.45566	0.0151528	0.146899
ENSG00000083457	ITGAE	0.207676	3.97655	1.12393	0.262759	0.597555
ENSG00000083520	DIS3	0.0762366	3.77493	0.80119	0.424232	0.732515
ENSG00000083535	PIBF1	0.334096	4.41557	2.13102	0.034644	0.223128
ENSG00000083544	TDRD3	-0.0325866	4.1636	-0.245608	0.806306	0.931166
ENSG00000083635	NUFIP1	-0.069544	0.847379	-0.399187	0.690298	0.880374
ENSG00000083642	PDS5B	-0.112494	4.44989	-1.28917	0.199235	0.529702
ENSG00000083720	OXCT1	0.0417962	3.33061	0.240969	0.809894	0.933055
ENSG00000083750	RRAGB	0.534008	3.02339	2.63682	0.00920945	0.110643
ENSG00000083799	CYLD	0.0382494	5.36132	0.305534	0.760364	0.912171
ENSG00000083807	SLC27A5	-0.147684	2.8461	-0.992334	0.322561	0.654289
ENSG00000083812	ZNF324	-0.44175	1.57792	-3.06226	0.00258514	0.052478
ENSG00000083814	ZNF671	0.112073	1.23915	0.62914	0.530171	0.796042
ENSG00000083817	ZNF416	0.0554583	0.361977	0.288527	0.773324	0.91822
ENSG00000083828	ZNF586	-0.125218	4.09751	-0.78304	0.434783	0.737968
ENSG00000083838	ZNF446	-0.065539	1.82187	-0.379018	0.705187	0.887453
ENSG00000083844	ZNF264	0.011617	3.80827	0.0993841	0.92096	0.976907
ENSG00000083845	RPS5	0.0774855	7.23801	0.452889	0.651254	0.861881
ENSG00000083857	FAT1	-0.163942	4.21735	-0.998446	0.319599	0.651292
ENSG00000083896	YTHDC1	0.00534613	5.98325	0.0500568	0.960141	0.987436
ENSG00000083937	CHMP2B	-0.0366165	4.66272	-0.389882	0.697152	0.884663
ENSG00000084070	SMAP2	-0.207112	5.89465	-1.34809	0.179571	0.50587
ENSG00000084072	PPIE	0.266622	3.99115	2.28585	0.0236005	0.180734
ENSG00000084073	ZMPSTE24	0.1983	4.37601	2.04601	0.0424238	0.2509
ENSG00000084090	STARD7	-0.0274331	5.33336	-0.231355	0.817341	0.935685
ENSG00000084092	NOA1	0.0607698	3.33233	0.393559	0.694441	0.88334
ENSG00000084093	REST	0.0607083	4.21993	0.654798	0.513556	0.788199
ENSG00000084110	HAL	-0.794754	2.60072	-1.73283	0.0850889	0.357522
ENSG00000084112	SSH1	-0.116872	4.22724	-0.780818	0.436085	0.739054
ENSG00000084207	GSTP1	-0.0412677	8.9249	-0.191362	0.848489	0.949501
ENSG00000084234	APLP2	-0.316116	7.07364	-2.94165	0.00375913	0.0667711
ENSG00000084444	FAM234B	0.195528	0.37881	1.15071	0.251602	0.585612
ENSG00000084453	SLCO1A2	-0.117507	1.69209	-0.562967	0.57426	0.823287
ENSG00000084463	WBP11	0.28046	4.42964	2.56599	0.0112235	0.12397
ENSG00000084623	EIF3I	-0.012817	5.36519	-0.120265	0.904427	0.972741
ENSG00000084636	COL16A1	0.581979	1.50842	2.31551	0.021879	0.175265
ENSG00000084652	TXLNA	0.00350779	3.98294	0.0326992	0.973956	0.991859
ENSG00000084676	NCOA1	-0.234236	5.01421	-1.83858	0.0678659	0.318776
ENSG00000084693	AGBL5	0.197866	4.01797	1.3131	0.191065	0.519386
ENSG00000084710	EFR3B	-0.280254	0.693738	-1.2138	0.226646	0.56156
ENSG00000084731	KIF3C	-0.461132	0.402883	-2.32492	0.0213567	0.173192
ENSG00000084733	RAB10	-0.0236203	5.78055	-0.234169	0.815159	0.935519
ENSG00000084734	GCKR	-0.279048	1.47494	-1.2223	0.223425	0.558109
ENSG00000084754	HADHA	-0.0601876	5.21096	-0.72772	0.467868	0.758465
ENSG00000084764	MAPRE3	0.0944848	5.19395	0.49255	0.623019	0.849121
ENSG00000084774	CAD	0.0236818	3.39435	0.147299	0.883085	0.963871
ENSG00000085063	CD59	0.0879812	7.42685	0.468296	0.640222	0.857083
ENSG00000085117	CD82	-0.0530046	6.21065	-0.367163	0.713991	0.892107
ENSG00000085185	BCORL1	-0.446455	1.31456	-2.56965	0.0111105	0.123153
ENSG00000085224	ATRX	-0.014693	5.98637	-0.128931	0.897577	0.970368
ENSG00000085231	AK6	0.214964	4.07652	1.17253	0.242759	0.577859
ENSG00000085265	FCN1	-0.156955	1.14528	-0.613593	0.540372	0.802041
ENSG00000085274	MYNN	0.164605	3.13382	1.21569	0.225926	0.560921
ENSG00000085276	MECOM	0.162089	5.45548	0.951497	0.342814	0.669742
ENSG00000085365	SCAMP1	0.368954	4.13296	3.07805	0.00245946	0.0505776
ENSG00000085377	PREP	0.105746	2.47366	0.720039	0.472571	0.761764
ENSG00000085382	HACE1	-0.0680637	3.62493	-0.464783	0.642731	0.858068
ENSG00000085415	SEH1L	0.00391957	3.42029	0.0292783	0.97668	0.992471
ENSG00000085433	WDR47	-0.0687185	3.91898	-0.494513	0.621635	0.84851
ENSG00000085449	WDFY1	0.505358	5.60163	3.89032	0.000147531	0.00709454
ENSG00000085465	OVGP1	-0.117605	1.84908	-0.517839	0.6053	0.840735
ENSG00000085491	SLC25A24	0.129433	3.77091	1.05545	0.292841	0.626468
ENSG00000085511	MAP3K4	-0.261401	4.85116	-1.60542	0.11041	0.405658
ENSG00000085514	PILRA	-0.697946	3.63415	-1.96625	0.0510324	0.276881
ENSG00000085552	IGSF9	-0.220156	1.43968	-1.4892	0.138441	0.451862
ENSG00000085563	ABCB1	0.508976	0.327791	1.91903	0.0567945	0.291893
ENSG00000085644	ZNF213	-0.0494644	2.01239	-0.327265	0.743903	0.905076
ENSG00000085662	AKR1B1	0.0399335	4.51749	0.194721	0.845863	0.948379
ENSG00000085719	CPNE3	0.122912	5.26581	1.08227	0.28079	0.614544
ENSG00000085721	RRN3	0.190754	3.8188	1.4854	0.139444	0.453412
ENSG00000085733	CTTN	-0.0142811	5.88078	-0.0965093	0.923239	0.977043
ENSG00000085760	MTIF2	0.00735204	3.79275	0.0536057	0.957317	0.987106
ENSG00000085788	DDHD2	-0.256189	4.58067	-1.78925	0.0755019	0.335179
ENSG00000085831	TTC39A	-0.0825241	4.81933	-0.738105	0.461552	0.75458
ENSG00000085832	EPS15	0.119272	5.45889	1.36164	0.175261	0.501615
ENSG00000085840	ORC1	-0.267927	0.311832	-1.42442	0.15631	0.476822
ENSG00000085871	MGST2	0.213542	4.689	1.0983	0.273756	0.608097
ENSG00000085872	CHERP	-0.186958	4.12135	-1.66665	0.0975762	0.380485
ENSG00000085978	ATG16L1	0.288901	4.32596	2.07688	0.0394412	0.240103
ENSG00000085982	USP40	0.224957	4.82181	1.21787	0.2251	0.560105
ENSG00000085998	POMGNT1	-0.196289	4.46276	-0.868904	0.386226	0.702726
ENSG00000085999	RAD54L	0.196588	2.33958	0.73925	0.460859	0.754529
ENSG00000086015	MAST2	-0.300674	4.51785	-1.72402	0.0866722	0.360898
ENSG00000086061	DNAJA1	0.427193	6.67382	4.62696	7.72e-06	0.000633951
ENSG00000086062	B4GALT1	-0.352186	5.09136	-3.76165	0.000237845	0.0103633
ENSG00000086065	CHMP5	0.796032	5.42672	6.98905	7.44e-11	1.63e-08
ENSG00000086102	NFX1	-0.0778909	5.22943	-0.933778	0.351852	0.676717
ENSG00000086159	AQP6	-0.537075	0.381121	-2.66148	0.00858867	0.106068
ENSG00000086189	DIMT1	0.105686	4.73806	0.834995	0.404989	0.717459
ENSG00000086200	IPO11	0.639942	4.73262	3.92189	0.000130989	0.00643641
ENSG00000086205	FOLH1	0.275428	1.8902	1.16246	0.246814	0.581304
ENSG00000086232	EIF2AK1	-0.0104861	5.10771	-0.0940499	0.925189	0.977232
ENSG00000086288	NME8	0.0133517	-0.0913937	0.0390386	0.968909	0.990383
ENSG00000086289	EPDR1	-0.0242897	1.70701	-0.112628	0.91047	0.974384
ENSG00000086300	SNX10	-0.167186	3.7514	-0.437529	0.662329	0.867539
ENSG00000086475	SEPHS1	0.0139595	4.25548	0.0850726	0.932312	0.980448
ENSG00000086504	MRPL28	0.344046	3.75668	2.28712	0.0235241	0.180594
ENSG00000086544	ITPKC	-0.315871	3.78459	-1.89372	0.0601007	0.300271
ENSG00000086548	CEACAM6	-0.0142594	5.6264	-0.0819247	0.934811	0.981376
ENSG00000086570	FAT2	0.0185371	1.20552	0.0675341	0.946242	0.984634
ENSG00000086589	RBM22	0.0479039	4.6882	0.400723	0.689169	0.880065
ENSG00000086598	TMED2	0.146307	5.40708	1.52602	0.129016	0.437877
ENSG00000086619	ERO1B	-0.227989	2.86125	-1.26702	0.207024	0.539644
ENSG00000086666	ZFAND6	-0.0700279	6.33226	-0.836936	0.4039	0.716521
ENSG00000086696	HSD17B2	-0.334406	2.51518	-1.66412	0.0980824	0.381142
ENSG00000086712	TXLNG	0.132806	2.47721	1.01418	0.312056	0.644502
ENSG00000086730	LAT2	-0.265188	3.6266	-0.954037	0.341531	0.66844
ENSG00000086758	HUWE1	-0.0248002	5.7797	-0.245831	0.806134	0.931131
ENSG00000086827	ZW10	0.044837	2.4421	0.261702	0.793894	0.927425
ENSG00000086848	ALG9	0.10031	4.42059	0.629138	0.530173	0.796042
ENSG00000086991	NOX4	-0.0467317	0.840366	-0.260571	0.794765	0.927755
ENSG00000087008	ACOX3	-0.0421297	4.63444	-0.302932	0.762342	0.912947
ENSG00000087053	MTMR2	0.129056	4.18626	0.932515	0.352502	0.677307
ENSG00000087074	PPP1R15A	-0.501216	6.61129	-2.54689	0.0118302	0.128293
ENSG00000087076	HSD17B14	0.146006	0.28131	0.57933	0.563196	0.816329
ENSG00000087077	TRIP6	0.132929	3.92589	0.920181	0.35889	0.682102
ENSG00000087086	FTL	-0.246747	10.8133	-1.63931	0.103151	0.391323
ENSG00000087087	SRRT	-0.140687	5.39811	-1.41571	0.158841	0.480201
ENSG00000087088	BAX	-0.0248272	4.51216	-0.163268	0.870517	0.958489
ENSG00000087095	NLK	0.155426	3.51622	1.23512	0.21863	0.55237
ENSG00000087111	PIGS	-0.00455047	4.09603	-0.0305869	0.975638	0.992309
ENSG00000087116	ADAMTS2	-0.138229	-0.200814	-0.639727	0.523282	0.792485
ENSG00000087128	TMPRSS11E	-0.486621	2.3141	-1.14165	0.255336	0.589924
ENSG00000087152	ATXN7L3	-0.175641	4.76932	-1.53658	0.126407	0.434858
ENSG00000087157	PGS1	-0.298033	5.41032	-1.15811	0.248577	0.583648
ENSG00000087191	PSMC5	0.295899	5.34807	2.88386	0.00447999	0.0733844
ENSG00000087206	UIMC1	0.0481258	4.74563	0.376911	0.706748	0.887967
ENSG00000087237	CETP	0.0333256	1.46748	0.144914	0.884964	0.964454
ENSG00000087250	MT3	-0.637076	1.61086	-1.63604	0.103834	0.392538
ENSG00000087253	LPCAT2	-0.530657	3.24069	-1.76033	0.0802979	0.34713
ENSG00000087258	GNAO1	-0.312437	0.558838	-1.19592	0.233529	0.568907
ENSG00000087263	OGFOD1	0.377861	3.96488	2.7689	0.00630206	0.0891798
ENSG00000087266	SH3BP2	-0.518389	5.27875	-2.49129	0.0137673	0.138653
ENSG00000087269	NOP14	-0.069502	3.28291	-0.669891	0.503911	0.782042
ENSG00000087274	ADD1	-0.190115	6.27733	-2.34938	0.0200489	0.168477
ENSG00000087299	L2HGDH	-0.178956	2.76611	-1.48168	0.140429	0.455186
ENSG00000087301	TXNDC16	0.0426722	1.58402	0.198307	0.843061	0.947341
ENSG00000087302	RTRAF	-0.0139533	5.74693	-0.128719	0.897745	0.970398
ENSG00000087303	NID2	-0.180758	0.491831	-0.667874	0.505194	0.782984
ENSG00000087338	GMCL1	-0.224273	3.61256	-1.74222	0.0834277	0.35505
ENSG00000087365	SF3B2	0.133895	5.95901	1.53214	0.127499	0.436425
ENSG00000087448	KLHL42	0.120087	1.81262	0.697821	0.486321	0.770851
ENSG00000087460	GNAS	-0.0290652	7.88753	-0.288894	0.773043	0.918105
ENSG00000087470	DNM1L	0.349418	5.23556	2.77905	0.00611745	0.0872428
ENSG00000087494	PTHLH	-0.0703625	-0.444022	-0.278547	0.780959	0.922149
ENSG00000087495	PHACTR3	0.0220878	2.78981	0.138171	0.890283	0.966953
ENSG00000087502	ERGIC2	0.109862	4.97952	0.78577	0.433186	0.737143
ENSG00000087510	TFAP2C	-0.327295	2.87287	-1.74877	0.0822852	0.352303
ENSG00000087586	AURKA	-0.347395	1.63445	-1.46732	0.144288	0.460512
ENSG00000087589	CASS4	-0.915887	2.67376	-2.78125	0.00607813	0.0871761
ENSG00000087842	PIR	0.210869	3.8233	1.24118	0.216389	0.54926
ENSG00000087884	AAMDC	0.0587714	4.52134	0.301828	0.763182	0.913193
ENSG00000087903	RFX2	-0.0188833	6.48292	-0.0936565	0.925501	0.977419
ENSG00000087995	METTL2A	-0.0721739	3.14588	-0.570658	0.569047	0.820017
ENSG00000088002	SULT2B1	-0.78424	2.24646	-3.19454	0.00169283	0.0401497
ENSG00000088035	ALG6	0.199576	3.30614	1.32123	0.188347	0.516569
ENSG00000088038	CNOT3	0.00716076	4.47689	0.0597699	0.952415	0.986275
ENSG00000088053	GP6	-0.386995	1.72778	-1.73966	0.0838787	0.355443
ENSG00000088179	PTPN4	-0.0508256	4.09345	-0.362558	0.717422	0.893831
ENSG00000088205	DDX18	-0.0545922	4.99592	-0.598195	0.550571	0.808482
ENSG00000088247	KHSRP	0.0854158	5.55215	0.713186	0.476789	0.76465
ENSG00000088256	GNA11	0.104541	4.97278	0.824112	0.411126	0.722798
ENSG00000088280	ASAP3	-0.150303	4.84923	-0.983562	0.326844	0.658126
ENSG00000088298	EDEM2	0.138669	2.54394	0.89592	0.371667	0.691616
ENSG00000088320	REM1	-0.385352	0.470217	-1.51828	0.130954	0.440695
ENSG00000088325	TPX2	0.746601	0.313089	4.07391	7.32e-05	0.00408429
ENSG00000088356	PDRG1	0.0788846	1.96466	0.453708	0.650665	0.86159
ENSG00000088367	EPB41L1	-0.112164	5.83036	-0.56174	0.575094	0.823612
ENSG00000088386	SLC15A1	-0.358803	1.09298	-1.91984	0.0566912	0.291647
ENSG00000088387	DOCK9	-0.175226	5.25937	-1.0019	0.317931	0.649576
ENSG00000088448	ANKRD10	0.236203	7.0639	0.867014	0.387257	0.703466
ENSG00000088451	TGDS	0.287113	2.19526	1.47413	0.142448	0.458507
ENSG00000088543	C3orf18	0.096619	1.54891	0.505265	0.614081	0.846012
ENSG00000088682	COQ9	0.365389	4.35905	2.66958	0.00839316	0.104901
ENSG00000088726	TMEM40	-0.117701	3.47821	-0.523921	0.601072	0.838111
ENSG00000088727	KIF9	0.151746	4.44321	0.754709	0.451554	0.748545
ENSG00000088756	ARHGAP28	-0.471144	3.09077	-2.53937	0.0120773	0.130031
ENSG00000088766	CRLS1	0.0316467	5.01027	0.210963	0.83319	0.942801
ENSG00000088808	PPP1R13B	-0.116713	4.85973	-0.776109	0.438852	0.74048
ENSG00000088812	ATRN	-0.190266	3.17621	-1.28443	0.200884	0.531544
ENSG00000088826	SMOX	-0.466269	1.19992	-1.7728	0.0782011	0.342629
ENSG00000088827	SIGLEC1	2.21257	0.584737	6.63802	4.9e-10	9.78e-08
ENSG00000088832	FKBP1A	-0.0902272	6.76564	-0.95752	0.339776	0.666323
ENSG00000088833	NSFL1C	-0.0586991	5.03779	-0.670406	0.503583	0.782042
ENSG00000088836	SLC4A11	-0.000138065	5.77178	-0.000644752	0.999486	0.999794
ENSG00000088854	C20orf194	-0.223267	3.27216	-1.8903	0.0605597	0.301137
ENSG00000088876	ZNF343	0.479055	1.0352	2.88144	0.0045127	0.0734497
ENSG00000088881	EBF4	0.591111	2.26701	2.57909	0.0108237	0.121424
ENSG00000088888	MAVS	-0.377524	3.35156	-4.67367	6.32e-06	0.000536301
ENSG00000088899	LZTS3	0.0489635	2.16716	0.280128	0.779748	0.921656
ENSG00000088930	XRN2	-0.0847002	4.62938	-1.05888	0.291282	0.625089
ENSG00000088970	KIZ	0.095486	3.37974	0.595554	0.552331	0.809258
ENSG00000088986	DYNLL1	0.536251	7.94474	2.45099	0.0153434	0.147693
ENSG00000088992	TESC	-0.145169	1.08756	-0.502456	0.61605	0.84676
ENSG00000089006	SNX5	-0.0120612	5.26581	-0.120231	0.904454	0.972741
ENSG00000089009	RPL6	-0.181813	7.44444	-1.1156	0.266296	0.601098
ENSG00000089012	SIRPG	0.653551	0.234758	2.18824	0.0301298	0.207075
ENSG00000089022	MAPKAPK5	0.18127	4.5018	1.66216	0.0984764	0.382142
ENSG00000089041	P2RX7	0.333652	1.61976	1.36707	0.173558	0.498813
ENSG00000089048	ESF1	0.38951	2.85564	2.70884	0.0075013	0.0984343
ENSG00000089050	RBBP9	-0.0735349	3.41209	-0.513137	0.608577	0.842603
ENSG00000089053	ANAPC5	-0.0417883	6.0495	-0.359934	0.71938	0.89394
ENSG00000089057	SLC23A2	-0.149727	3.98116	-0.979267	0.328954	0.659759
ENSG00000089060	SLC8B1	-0.205113	3.89852	-1.39436	0.165178	0.488722
ENSG00000089063	TMEM230	0.129213	5.30503	1.14432	0.254232	0.588839
ENSG00000089091	DZANK1	0.000985151	3.73668	0.00746277	0.994055	0.998087
ENSG00000089094	KDM2B	0.0784328	4.07775	0.67395	0.501334	0.781301
ENSG00000089101	CFAP61	0.234277	5.25427	0.76771	0.443812	0.743442
ENSG00000089123	TASP1	0.525276	3.49508	2.92027	0.00401233	0.068616
ENSG00000089127	OAS1	2.42072	5.96861	11.5029	1.35e-22	1.33e-19
ENSG00000089154	GCN1	0.100187	4.89712	0.608198	0.543935	0.804106
ENSG00000089157	RPLP0	-0.163421	8.39309	-1.03212	0.303604	0.636464
ENSG00000089159	PXN	-0.322967	6.37145	-2.93046	0.00388975	0.0676329
ENSG00000089169	RPH3A	-0.044759	2.33617	-0.156321	0.875981	0.960729
ENSG00000089177	KIF16B	0.0438525	2.7071	0.253692	0.800066	0.928924
ENSG00000089195	TRMT6	0.109335	2.69376	0.809715	0.419329	0.728905
ENSG00000089199	CHGB	-0.126807	-0.123224	-0.739548	0.460678	0.75439
ENSG00000089220	PEBP1	-0.00442173	6.01843	-0.0359969	0.971331	0.991119
ENSG00000089234	BRAP	0.0294719	3.37843	0.27238	0.785688	0.924342
ENSG00000089248	ERP29	0.155821	4.75433	1.3709	0.172361	0.497739
ENSG00000089280	FUS	-0.0560649	6.76521	-0.45524	0.649566	0.861337
ENSG00000089289	IGBP1	0.0559428	4.19098	0.468033	0.64041	0.857195
ENSG00000089327	FXYD5	-0.21594	4.04142	-0.909105	0.364688	0.686493
ENSG00000089335	ZNF302	0.350436	5.03722	1.29691	0.196565	0.526297
ENSG00000089351	GRAMD1A	-0.301685	4.90493	-1.07003	0.286249	0.619173
ENSG00000089356	FXYD3	0.488519	7.13437	2.50173	0.0133833	0.137074
ENSG00000089486	CDIP1	-0.0459246	2.55388	-0.209865	0.834045	0.943107
ENSG00000089505	CMTM1	-0.180525	1.90551	-0.614185	0.539982	0.801709
ENSG00000089597	GANAB	0.0532474	5.10766	0.467638	0.640691	0.857424
ENSG00000089639	GMIP	-0.289665	4.05918	-1.10674	0.270098	0.605149
ENSG00000089682	RBM41	0.0528662	3.34118	0.419361	0.675526	0.874154
ENSG00000089685	BIRC5	-0.20971	0.801091	-0.824084	0.411142	0.722798
ENSG00000089692	LAG3	1.84753	1.77142	6.21252	4.48e-09	7.85e-07
ENSG00000089693	MLF2	-0.209324	5.49981	-1.98892	0.0484474	0.26945
ENSG00000089723	OTUB2	-0.0335029	0.725548	-0.164137	0.869835	0.958385
ENSG00000089737	DDX24	0.341234	5.79174	3.11473	0.00218901	0.0469978
ENSG00000089775	ZBTB25	0.098504	3.15615	0.892241	0.373629	0.692878
ENSG00000089818	NECAP1	-0.0242494	4.33079	-0.22141	0.825061	0.939837
ENSG00000089820	ARHGAP4	0.0324988	3.65233	0.125168	0.900551	0.971373
ENSG00000089876	DHX32	0.076902	5.1095	0.453937	0.650501	0.86159
ENSG00000089902	RCOR1	-0.372285	4.66662	-2.24597	0.0261012	0.190423
ENSG00000089916	GPATCH2L	0.0156736	4.29756	0.118483	0.905836	0.972974
ENSG00000090006	LTBP4	-0.475393	4.28185	-2.85247	0.00492247	0.0770259
ENSG00000090013	BLVRB	0.176468	4.34715	1.0667	0.287744	0.620557
ENSG00000090020	SLC9A1	-0.358662	3.86618	-3.04882	0.00269674	0.0535709
ENSG00000090054	SPTLC1	0.0771487	5.31106	0.498886	0.618558	0.847482
ENSG00000090060	PAPOLA	0.0546623	7.08679	0.587396	0.557781	0.812652
ENSG00000090061	CCNK	0.143341	5.04594	1.57921	0.116301	0.41748
ENSG00000090097	PCBP4	-0.084779	1.21806	-0.419031	0.675766	0.874198
ENSG00000090104	RGS1	0.939719	3.88534	2.7636	0.00640046	0.0896864
ENSG00000090238	YPEL3	-0.392998	5.88099	-2.77975	0.00610504	0.0872235
ENSG00000090263	MRPS33	0.408583	4.11626	2.26308	0.0250011	0.18601
ENSG00000090266	NDUFB2	0.0134676	5.60036	0.109605	0.912863	0.974721
ENSG00000090273	NUDC	0.503297	5.08635	3.1874	0.00173255	0.0406863
ENSG00000090316	MAEA	-0.568176	5.32204	-4.32097	2.75e-05	0.00185085
ENSG00000090339	ICAM1	-0.25885	4.41801	-0.650975	0.516014	0.789923
ENSG00000090372	STRN4	-0.133971	5.01068	-1.41854	0.158014	0.479598
ENSG00000090376	IRAK3	-0.356769	4.61474	-1.57033	0.118352	0.420811
ENSG00000090382	LYZ	-0.060397	6.62673	-0.349262	0.727361	0.8966
ENSG00000090432	MUL1	0.23416	2.02311	1.64145	0.102706	0.390935
ENSG00000090447	TFAP4	0.0298334	2.14399	0.179027	0.858147	0.95294
ENSG00000090470	PDCD7	0.0434802	2.6789	0.256982	0.797529	0.928252
ENSG00000090487	SPG21	0.0933256	5.4103	1.03592	0.301832	0.634519
ENSG00000090520	DNAJB11	0.138634	3.96827	1.03126	0.304004	0.636794
ENSG00000090530	P3H2	-0.396889	1.80992	-1.65301	0.100327	0.385776
ENSG00000090554	FLT3LG	0.444528	2.42186	2.37442	0.0187844	0.162772
ENSG00000090565	RAB11FIP3	-0.186166	3.64382	-1.23944	0.21703	0.549649
ENSG00000090581	GNPTG	-0.178944	4.35585	-1.26062	0.209314	0.541409
ENSG00000090612	ZNF268	0.288801	3.12192	2.07549	0.0395714	0.240684
ENSG00000090615	GOLGA3	0.172666	5.24423	1.31937	0.188965	0.517393
ENSG00000090621	PABPC4	-0.191489	6.00798	-1.38144	0.169105	0.49376
ENSG00000090659	CD209	0.00896745	0.570183	0.0386411	0.969226	0.990432
ENSG00000090661	CERS4	0.374436	4.03935	1.8907	0.0605067	0.301137
ENSG00000090674	MCOLN1	-0.295602	3.974	-1.42499	0.156143	0.476814
ENSG00000090686	USP48	0.0251947	5.23656	0.202471	0.83981	0.945728
ENSG00000090776	EFNB1	-0.166303	0.213066	-0.999601	0.319041	0.650833
ENSG00000090857	PDPR	-0.0322239	3.73264	-0.262661	0.793156	0.926889
ENSG00000090861	AARS1	0.156696	4.35503	1.41548	0.158908	0.480201
ENSG00000090863	GLG1	0.00800902	4.91057	0.0631979	0.949689	0.985646
ENSG00000090905	TNRC6A	-0.0143306	5.22892	-0.0856534	0.931851	0.980395
ENSG00000090924	PLEKHG2	-0.733715	4.75441	-2.58021	0.0107899	0.121217
ENSG00000090971	NAT14	0.185525	2.67375	0.758997	0.448992	0.746575
ENSG00000090975	PITPNM2	0.1013	1.35099	0.557346	0.578085	0.82517
ENSG00000090989	EXOC1	0.226552	4.6287	2.15906	0.0323633	0.215872
ENSG00000091009	RBM27	0.00405623	3.4638	0.0328428	0.973842	0.991859
ENSG00000091039	OSBPL8	-0.414869	5.67109	-2.63571	0.00923821	0.110747
ENSG00000091073	DTX2	-0.168997	7.48084	-0.979158	0.329008	0.659759
ENSG00000091106	NLRC4	-0.575954	0.903888	-1.83826	0.0679127	0.318901
ENSG00000091127	PUS7	0.221146	1.86177	1.28184	0.201787	0.532772
ENSG00000091129	NRCAM	-0.113873	0.0339846	-0.433924	0.664939	0.868434
ENSG00000091136	LAMB1	-0.116044	3.58418	-0.49686	0.619982	0.84808
ENSG00000091137	SLC26A4	0.142543	2.12383	0.337936	0.735862	0.901006
ENSG00000091140	DLD	0.362554	5.17529	3.1894	0.00172135	0.0405237
ENSG00000091157	WDR7	0.0379549	4.43881	0.291346	0.771171	0.917488
ENSG00000091164	TXNL1	0.0248057	4.92655	0.23973	0.810852	0.933204
ENSG00000091181	IL5RA	0.351211	4.71069	1.5317	0.127609	0.436458
ENSG00000091262	ABCC6	0.124714	4.07106	0.683611	0.495228	0.777547
ENSG00000091317	CMTM6	-0.182771	5.52261	-1.79714	0.0742353	0.333005
ENSG00000091409	ITGA6	-0.151191	3.56798	-0.877795	0.381396	0.698749
ENSG00000091428	RAPGEF4	0.486704	0.503329	1.82649	0.0696756	0.32194
ENSG00000091436	MAP3K20	-0.637064	2.71958	-2.9007	0.00425782	0.0710673
ENSG00000091483	FH	0.193768	3.7254	1.19941	0.232175	0.568409
ENSG00000091490	SEL1L3	0.22881	5.44153	1.80985	0.0722317	0.328053
ENSG00000091513	TF	-0.192025	2.76259	-1.70363	0.0904276	0.368572
ENSG00000091527	CDV3	-0.0402516	5.7031	-0.29704	0.766829	0.915124
ENSG00000091536	MYO15A	-0.517824	2.30292	-2.88078	0.00452163	0.0734497
ENSG00000091542	ALKBH5	-0.0732684	5.12106	-0.612715	0.540951	0.802372
ENSG00000091592	NLRP1	-0.398007	3.55259	-1.76238	0.0799501	0.346443
ENSG00000091622	PITPNM3	-0.487669	3.10258	-2.70204	0.00764927	0.0994657
ENSG00000091640	SPAG7	0.147029	5.26719	1.60158	0.111258	0.40757
ENSG00000091651	ORC6	-0.22873	5.13922	-1.5394	0.12572	0.433514
ENSG00000091656	ZFHX4	0.347869	2.4753	1.96172	0.0515625	0.278699
ENSG00000091664	SLC17A6	0.0466275	0.30206	0.197574	0.843634	0.947359
ENSG00000091732	ZC3HC1	-0.134836	2.568	-0.710173	0.47865	0.765694
ENSG00000091831	ESR1	0.780514	2.13566	2.92045	0.00401019	0.068616
ENSG00000091844	RGS17	-0.201985	1.3771	-1.32345	0.187611	0.515629
ENSG00000091879	ANGPT2	-0.0593425	1.22763	-0.437693	0.66221	0.867538
ENSG00000091947	TMEM101	0.11935	2.7622	0.632307	0.528106	0.795351
ENSG00000091972	CD200	0.555597	1.16801	2.46855	0.014638	0.143764
ENSG00000091986	CCDC80	0.234719	5.23206	1.047	0.296706	0.629927
ENSG00000092010	PSME1	0.720848	6.31623	5.77439	4.02e-08	5.71e-06
ENSG00000092020	PPP2R3C	-0.293147	4.75344	-2.12581	0.0350826	0.224359
ENSG00000092036	HAUS4	-0.133822	4.25212	-0.818928	0.414068	0.725275
ENSG00000092068	SLC7A8	0.093961	2.78317	0.462101	0.644648	0.858822
ENSG00000092094	OSGEP	-0.0695501	3.81576	-0.548404	0.584193	0.82862
ENSG00000092096	SLC22A17	0.0738412	0.166989	0.297598	0.766403	0.915103
ENSG00000092098	RNF31	0.337005	5.08427	2.71066	0.00746201	0.0981171
ENSG00000092108	SCFD1	-0.0511446	5.56003	-0.381511	0.70334	0.886651
ENSG00000092140	G2E3	0.171949	4.73315	0.924336	0.35673	0.680776
ENSG00000092148	HECTD1	-0.167937	7.01806	-1.17411	0.242127	0.576986
ENSG00000092199	HNRNPC	0.106119	8.03716	1.44266	0.151108	0.470023
ENSG00000092200	RPGRIP1	-0.501973	2.83445	-1.52088	0.130301	0.439718
ENSG00000092201	SUPT16H	0.0138392	4.34058	0.133459	0.894002	0.968587
ENSG00000092203	TOX4	-0.154469	4.96094	-1.41922	0.157816	0.479342
ENSG00000092208	GEMIN2	0.345023	3.8084	1.83464	0.0684515	0.319528
ENSG00000092295	TGM1	0.205691	2.36504	0.816643	0.41537	0.725479
ENSG00000092330	TINF2	-0.163722	4.58013	-1.06133	0.29017	0.623913
ENSG00000092377	TBL1Y	-0.239341	-0.434887	-0.730669	0.46607	0.758181
ENSG00000092421	SEMA6A	0.494352	2.4405	2.05223	0.0418073	0.248652
ENSG00000092439	TRPM7	0.168283	4.84181	1.20714	0.229192	0.564761
ENSG00000092445	TYRO3	-0.472283	1.96111	-2.83608	0.00516902	0.0794971
ENSG00000092470	WDR76	-0.0836135	1.85518	-0.468835	0.639838	0.856792
ENSG00000092529	CAPN3	-0.0780701	3.23174	-0.429735	0.667977	0.869491
ENSG00000092531	SNAP23	-0.0362196	5.41981	-0.358395	0.720529	0.894452
ENSG00000092621	PHGDH	-0.0580542	3.29906	-0.26932	0.788037	0.925194
ENSG00000092758	COL9A3	-0.0276482	0.881223	-0.111816	0.911112	0.974491
ENSG00000092820	EZR	0.018375	8.2765	0.110623	0.912057	0.974592
ENSG00000092841	MYL6	0.256471	8.25436	2.42786	0.0163185	0.152487
ENSG00000092847	AGO1	-0.353162	3.57216	-3.6265	0.000387845	0.0147409
ENSG00000092850	TEKT2	0.380708	4.99828	1.76823	0.0789633	0.344058
ENSG00000092853	CLSPN	0.0181495	0.966396	0.0956587	0.923914	0.977043
ENSG00000092871	RFFL	0.0479521	4.38734	0.39553	0.692989	0.882632
ENSG00000092929	UNC13D	-0.147656	4.19962	-0.499097	0.618409	0.847452
ENSG00000092931	MFSD11	0.0727885	4.19465	0.552756	0.581216	0.827095
ENSG00000092964	DPYSL2	-0.0610901	3.03491	-0.266974	0.789839	0.925491
ENSG00000092969	TGFB2	-0.457853	1.23151	-1.85363	0.0656682	0.313522
ENSG00000092978	GPATCH2	0.384598	4.05196	2.2275	0.0273355	0.19492
ENSG00000093000	NUP50	0.150455	6.07595	1.5175	0.131152	0.440917
ENSG00000093009	CDC45	-0.0278123	-0.459732	-0.123535	0.901841	0.971702
ENSG00000093010	COMT	0.14473	5.1243	0.965049	0.336004	0.664478
ENSG00000093072	ADA2	0.0149899	4.13383	0.0815396	0.935117	0.98154
ENSG00000093134	VNN3	0.164347	6.84498	0.845266	0.399248	0.712818
ENSG00000093144	ECHDC1	0.136083	5.43184	1.075	0.284022	0.617049
ENSG00000093167	LRRFIP2	-0.054063	5.30639	-0.433358	0.66535	0.868604
ENSG00000093183	SEC22C	0.177095	3.88638	1.44087	0.151612	0.470804
ENSG00000093217	XYLB	-0.365591	2.45972	-2.11509	0.0360005	0.228138
ENSG00000094631	HDAC6	-0.110561	5.04896	-1.01979	0.309397	0.642121
ENSG00000094661	OR1I1	-0.189793	2.4763	-1.04665	0.29687	0.629965
ENSG00000094755	GABRP	0.0422806	7.27687	0.270358	0.78724	0.924759
ENSG00000094804	CDC6	-0.0389007	1.53847	-0.148352	0.882255	0.963603
ENSG00000094841	UPRT	0.150674	3.79568	1.07983	0.281873	0.615107
ENSG00000094880	CDC23	-0.0404828	3.29803	-0.301517	0.763419	0.913355
ENSG00000094914	AAAS	-0.042714	3.20834	-0.289181	0.772824	0.918105
ENSG00000094916	CBX5	-0.100769	4.70191	-0.844546	0.399649	0.713084
ENSG00000094963	FMO2	-0.353086	4.17756	-1.25575	0.211071	0.543869
ENSG00000094975	SUCO	0.0299754	4.32533	0.247132	0.805128	0.930973
ENSG00000095002	MSH2	0.165312	2.98442	1.37231	0.171925	0.497248
ENSG00000095015	MAP3K1	-0.0211309	3.83837	-0.187553	0.851469	0.950476
ENSG00000095059	DHPS	0.269765	4.48696	2.03226	0.0438125	0.255851
ENSG00000095066	HOOK2	-0.124877	4.89896	-0.686524	0.493395	0.775985
ENSG00000095139	ARCN1	-0.114867	5.2381	-1.12757	0.261223	0.59622
ENSG00000095203	EPB41L4B	0.0842059	4.20704	0.401387	0.688681	0.87989
ENSG00000095209	TMEM38B	-0.0642968	3.16798	-0.294527	0.768744	0.916291
ENSG00000095261	PSMD5	0.0619084	3.8382	0.430817	0.667192	0.869003
ENSG00000095303	PTGS1	-0.0295603	0.563093	-0.111039	0.911727	0.974592
ENSG00000095319	NUP188	0.0706078	4.54633	0.531298	0.595963	0.834837
ENSG00000095321	CRAT	0.0358925	2.90965	0.182175	0.855681	0.951942
ENSG00000095370	SH2D3C	-0.00390519	2.11552	-0.0114751	0.990859	0.996974
ENSG00000095380	NANS	0.077917	5.32116	0.800284	0.424755	0.73252
ENSG00000095383	TBC1D2	-0.276907	3.5677	-1.79754	0.0741707	0.332829
ENSG00000095397	WHRN	0.0912239	4.33293	0.503897	0.61504	0.846312
ENSG00000095464	PDE6C	-0.17565	0.00206392	-1.17148	0.243182	0.578149
ENSG00000095485	CWF19L1	0.0499595	3.57652	0.40777	0.683998	0.877707
ENSG00000095539	SEMA4G	0.0811474	1.45108	0.368539	0.712968	0.891803
ENSG00000095564	BTAF1	-0.0891884	4.19012	-0.801162	0.424249	0.732515
ENSG00000095574	IKZF5	-0.0657844	3.06709	-0.410664	0.681879	0.876652
ENSG00000095585	BLNK	0.265681	3.60619	1.41801	0.158168	0.479637
ENSG00000095587	TLL2	-0.316596	0.365082	-2.0034	0.0468545	0.264802
ENSG00000095596	CYP26A1	-0.34155	0.756626	-1.2466	0.214399	0.547027
ENSG00000095627	TDRD1	-0.15319	0.695546	-0.811333	0.418402	0.728337
ENSG00000095637	SORBS1	-0.111459	1.53057	-0.664522	0.507331	0.784138
ENSG00000095739	BAMBI	-0.0176934	2.23886	-0.0903575	0.928118	0.97849
ENSG00000095787	WAC	-0.0639669	6.4266	-0.767345	0.444028	0.743567
ENSG00000095794	CREM	-0.168432	6.03857	-0.914334	0.361943	0.684633
ENSG00000095906	NUBP2	-0.110625	3.48048	-0.692459	0.489672	0.773406
ENSG00000095932	SMIM24	-0.10924	-0.351297	-0.443373	0.658107	0.865448
ENSG00000095951	HIVEP1	-0.151743	5.28891	-0.998015	0.319807	0.651553
ENSG00000095970	TREM2	-0.0809928	1.10651	-0.261447	0.794091	0.927486
ENSG00000096006	CRISP3	-0.675775	0.166024	-1.50599	0.134078	0.44614
ENSG00000096060	FKBP5	-0.0743689	4.3292	-0.370865	0.711238	0.890633
ENSG00000096063	SRPK1	-0.482915	5.38836	-2.82021	0.00541856	0.0815525
ENSG00000096070	BRPF3	-0.186038	3.89175	-1.48409	0.139789	0.453852
ENSG00000096080	MRPS18A	0.332576	3.42689	1.97193	0.0503744	0.275314
ENSG00000096088	PGC	-0.31567	-0.226779	-1.17565	0.241514	0.576216
ENSG00000096092	TMEM14A	0.201981	3.49255	0.805277	0.421877	0.730807
ENSG00000096093	EFHC1	0.0989108	7.30011	0.471287	0.63809	0.856263
ENSG00000096384	HSP90AB1	0.428626	7.46399	3.11572	0.0021821	0.0469837
ENSG00000096401	CDC5L	0.0106163	3.25851	0.127054	0.89906	0.97096
ENSG00000096433	ITPR3	0.0340037	3.36459	0.295561	0.767956	0.915724
ENSG00000096654	ZNF184	0.0687799	1.39339	0.425353	0.671162	0.871478
ENSG00000096696	DSP	-0.0770464	5.15585	-0.527622	0.598507	0.836753
ENSG00000096717	SIRT1	-0.187694	3.53108	-1.30883	0.192505	0.521446
ENSG00000096746	HNRNPH3	0.200551	5.49825	2.12855	0.0348516	0.223813
ENSG00000096872	IFT74	0.305758	4.66148	2.03031	0.0440124	0.256449
ENSG00000096968	JAK2	0.538636	4.62643	4.25785	3.54e-05	0.0022982
ENSG00000096996	IL12RB1	0.0165164	2.38542	0.0702058	0.944119	0.983806
ENSG00000097007	ABL1	0.0649773	3.58679	0.505579	0.613861	0.84601
ENSG00000097021	ACOT7	0.29827	2.29528	1.59393	0.112962	0.410732
ENSG00000097033	SH3GLB1	-0.0228618	5.32737	-0.254584	0.799378	0.928536
ENSG00000097046	CDC7	0.644945	1.05393	3.23342	0.001491	0.0367491
ENSG00000097096	SYDE2	-0.0652064	1.63594	-0.382267	0.70278	0.886651
ENSG00000099139	PCSK5	1.32622	5.02663	3.79132	0.000213261	0.00963829
ENSG00000099194	SCD	0.160065	2.40119	1.00516	0.316367	0.648974
ENSG00000099203	TMED1	0.16938	3.22354	0.854411	0.394179	0.708415
ENSG00000099204	ABLIM1	-0.102209	6.52351	-0.631712	0.528494	0.795434
ENSG00000099219	ERMP1	0.123553	3.5822	1.1325	0.259152	0.593888
ENSG00000099246	RAB18	-0.168532	5.67294	-1.63895	0.103226	0.391323
ENSG00000099250	NRP1	-0.125999	3.1863	-0.84525	0.399257	0.712818
ENSG00000099256	PRTFDC1	0.565828	-0.316369	2.80371	0.00568944	0.0841835
ENSG00000099260	PALMD	0.212269	3.45849	1.08577	0.279243	0.613687
ENSG00000099282	TSPAN15	0.123743	4.4423	0.622978	0.534203	0.798378
ENSG00000099284	MACROH2A2	0.230037	1.39448	1.22473	0.22251	0.557618
ENSG00000099290	WASHC2A	0.285201	4.76799	2.58859	0.0105416	0.119438
ENSG00000099308	MAST3	-0.460986	3.46853	-2.02016	0.0450672	0.259907
ENSG00000099326	MZF1	-0.0586721	3.90072	-0.406988	0.684571	0.877804
ENSG00000099330	OCEL1	-0.139725	3.73555	-0.817836	0.41469	0.725423
ENSG00000099331	MYO9B	-0.397767	5.53511	-2.32348	0.0214357	0.173577
ENSG00000099337	KCNK6	-0.308566	3.81644	-1.94677	0.0533463	0.283606
ENSG00000099338	CATSPERG	0.186468	3.32177	0.974196	0.331457	0.66071
ENSG00000099341	PSMD8	-0.024615	5.53374	-0.227243	0.82053	0.937299
ENSG00000099364	FBXL19	-0.00979402	3.26654	-0.0548733	0.956309	0.987013
ENSG00000099365	STX1B	-0.122831	0.413082	-0.558999	0.576958	0.824532
ENSG00000099377	HSD3B7	0.0875731	1.83225	0.501132	0.61698	0.846955
ENSG00000099381	SETD1A	-0.0616994	2.48972	-0.366167	0.714733	0.892619
ENSG00000099385	BCL7C	-0.204498	3.55484	-2.14322	0.0336351	0.220078
ENSG00000099617	EFNA2	-0.391189	0.209515	-1.27728	0.203389	0.534674
ENSG00000099622	CIRBP	-0.0765652	6.57382	-0.673977	0.501317	0.781301
ENSG00000099624	ATP5F1D	0.126368	4.69728	0.817536	0.414861	0.725423
ENSG00000099625	CBARP	-0.446653	-0.298281	-1.75134	0.0818404	0.351352
ENSG00000099725	PRKY	-0.198867	2.98535	-0.478174	0.633191	0.853876
ENSG00000099769	IGFALS	-0.149665	-0.213022	-0.758861	0.449073	0.746625
ENSG00000099783	HNRNPM	0.154	6.49904	1.9891	0.048427	0.26945
ENSG00000099785	MARCHF2	-0.233637	4.37162	-1.98246	0.0491723	0.27233
ENSG00000099795	NDUFB7	0.128275	5.04963	0.603935	0.546758	0.806058
ENSG00000099797	TECR	0.108485	5.75049	0.930358	0.353614	0.678452
ENSG00000099800	TIMM13	-0.186805	3.03012	-0.986777	0.32527	0.656828
ENSG00000099804	CDC34	-0.16841	4.03275	-1.10707	0.269956	0.605091
ENSG00000099810	MTAP	-0.00689932	4.93109	-0.051396	0.959075	0.98736
ENSG00000099812	MISP	0.267373	4.22365	1.69584	0.0918985	0.37129
ENSG00000099814	CEP170B	-0.193171	3.93125	-1.11913	0.264792	0.599715
ENSG00000099817	POLR2E	0.249908	5.41884	1.95748	0.0520634	0.280367
ENSG00000099821	POLRMT	0.129347	2.91785	0.795712	0.4274	0.734574
ENSG00000099834	CDHR5	-0.401931	1.51218	-1.78498	0.0761953	0.336835
ENSG00000099840	IZUMO4	-0.156486	1.66847	-0.722206	0.471242	0.760436
ENSG00000099849	RASSF7	0.26227	3.64856	1.43298	0.15385	0.473798
ENSG00000099860	GADD45B	-0.69576	5.64533	-2.42638	0.0163828	0.152487
ENSG00000099864	PALM	-0.162178	1.38851	-0.819012	0.414021	0.725272
ENSG00000099866	MADCAM1	-0.181781	-0.0574556	-0.817475	0.414896	0.725423
ENSG00000099875	MKNK2	-0.310416	6.26265	-2.30694	0.0223647	0.1765
ENSG00000099889	ARVCF	-0.167178	3.06905	-0.766711	0.444404	0.743638
ENSG00000099899	TRMT2A	0.1226	3.78969	0.78293	0.434847	0.737968
ENSG00000099901	RANBP1	0.442093	4.66302	2.72977	0.00706172	0.0946692
ENSG00000099904	ZDHHC8	0.0175068	2.76582	0.105305	0.916268	0.975847
ENSG00000099910	KLHL22	0.034115	4.02342	0.231282	0.817397	0.935685
ENSG00000099917	MED15	-0.0474804	5.75007	-0.457536	0.647918	0.860115
ENSG00000099937	SERPIND1	-0.206291	0.264966	-1.07276	0.285026	0.617846
ENSG00000099940	SNAP29	-0.0766541	3.97055	-0.705401	0.481606	0.76762
ENSG00000099942	CRKL	-0.0520817	3.40492	-0.476589	0.634317	0.854551
ENSG00000099949	LZTR1	0.13303	3.83917	0.882676	0.378761	0.696699
ENSG00000099956	SMARCB1	-0.111267	5.13348	-0.951515	0.342805	0.669742
ENSG00000099957	P2RX6	0.45276	1.87403	1.57572	0.117103	0.418878
ENSG00000099958	DERL3	0.0924337	1.31203	0.405981	0.685309	0.877868
ENSG00000099960	SLC7A4	0.285339	0.218838	1.33305	0.184445	0.511528
ENSG00000099968	BCL2L13	0.0796431	4.93443	0.833363	0.405906	0.718402
ENSG00000099974	DDTL	-0.201758	1.66602	-1.04749	0.296485	0.62991
ENSG00000099977	DDT	0.380444	4.25525	2.26731	0.0247354	0.184818
ENSG00000099985	OSM	-0.396216	4.39096	-0.713702	0.476471	0.764394
ENSG00000099991	CABIN1	-0.0419853	5.27015	-0.277126	0.782048	0.922237
ENSG00000099992	TBC1D10A	-0.0989033	3.60678	-0.648134	0.517845	0.790726
ENSG00000099995	SF3A1	-0.2813	5.75961	-2.29392	0.0231203	0.179046
ENSG00000099998	GGT5	-0.304382	1.25539	-1.38893	0.16682	0.490355
ENSG00000099999	RNF215	-0.14576	3.00493	-0.791611	0.429781	0.73493
ENSG00000100003	SEC14L2	-0.13849	3.69314	-0.573653	0.567024	0.818928
ENSG00000100012	SEC14L3	-0.0688526	4.25775	-0.207892	0.835583	0.943972
ENSG00000100014	SPECC1L	-0.257528	4.16185	-2.0729	0.0398152	0.241262
ENSG00000100023	PPIL2	-0.0838323	4.58521	-0.603805	0.546844	0.806092
ENSG00000100024	UPB1	-0.719846	1.8211	-2.3924	0.0179201	0.158312
ENSG00000100027	YPEL1	0.326434	1.23834	1.49055	0.138085	0.451309
ENSG00000100028	SNRPD3	0.209293	5.19808	1.34025	0.1821	0.50825
ENSG00000100029	PES1	0.170706	4.28669	1.09068	0.277083	0.611627
ENSG00000100030	MAPK1	-0.299576	5.32506	-2.70168	0.00765719	0.0994867
ENSG00000100031	GGT1	-0.241494	2.08387	-0.741059	0.459764	0.753362
ENSG00000100033	PRODH	-0.0883332	3.7058	-0.403764	0.686936	0.879134
ENSG00000100034	PPM1F	-0.413439	3.67396	-1.84442	0.0670064	0.316806
ENSG00000100036	SLC35E4	-0.0882858	1.06948	-0.566407	0.571926	0.821958
ENSG00000100038	TOP3B	0.0269874	3.10046	0.146021	0.884092	0.964299
ENSG00000100053	CRYBB3	0.162213	0.466753	0.719673	0.472796	0.761834
ENSG00000100055	CYTH4	-0.227486	5.50608	-0.548521	0.584113	0.82862
ENSG00000100056	ESS2	-0.0596902	2.16932	-0.409606	0.682653	0.87719
ENSG00000100060	MFNG	0.106988	1.57405	0.347314	0.728821	0.897329
ENSG00000100065	CARD10	-0.203435	3.43698	-0.830129	0.407726	0.719842
ENSG00000100068	LRP5L	-0.0957928	1.85066	-0.498429	0.618879	0.847588
ENSG00000100075	SLC25A1	-0.192964	3.76031	-1.49667	0.136487	0.449719
ENSG00000100077	GRK3	0.228991	2.59851	1.38173	0.169018	0.49369
ENSG00000100079	LGALS2	0.585222	1.86277	1.89069	0.0605076	0.301137
ENSG00000100083	GGA1	-0.0629022	5.6264	-0.539834	0.590076	0.831972
ENSG00000100084	HIRA	0.51664	3.55282	3.41691	0.000806561	0.0247507
ENSG00000100092	SH3BP1	0.037389	3.75734	0.207053	0.836236	0.944279
ENSG00000100097	LGALS1	0.684906	5.11363	2.15354	0.0328024	0.217391
ENSG00000100099	HPS4	-0.150085	4.14496	-1.3806	0.169364	0.494067
ENSG00000100100	PIK3IP1	-0.28652	5.15739	-1.40347	0.162451	0.485286
ENSG00000100104	SRRD	-0.440998	2.38495	-2.1521	0.0329171	0.217728
ENSG00000100105	PATZ1	-0.0255249	3.55097	-0.242417	0.808773	0.932445
ENSG00000100106	TRIOBP	0.00203428	4.21857	0.0209295	0.983328	0.994355
ENSG00000100109	TFIP11	-0.0345287	4.47001	-0.321373	0.748355	0.906795
ENSG00000100116	GCAT	-0.223792	1.94451	-1.1077	0.269687	0.605077
ENSG00000100121	GGTLC2	-0.112897	2.47212	-0.340917	0.733622	0.899692
ENSG00000100124	ANKRD54	-0.0158719	4.58023	-0.123324	0.902009	0.971714
ENSG00000100129	EIF3L	-0.646743	6.27224	-3.85342	0.000169391	0.00799939
ENSG00000100138	SNU13	0.131388	5.2124	0.890982	0.374302	0.693023
ENSG00000100139	MICALL1	-0.302606	3.56379	-2.15901	0.0323677	0.215872
ENSG00000100142	POLR2F	-0.00726781	4.59815	-0.0486837	0.961233	0.987722
ENSG00000100146	SOX10	-0.237939	-0.0282186	-1.1377	0.256978	0.592056
ENSG00000100147	CCDC134	0.0890841	2.50366	0.586301	0.558515	0.812905
ENSG00000100150	DEPDC5	-0.0341087	4.53912	-0.282152	0.778198	0.920681
ENSG00000100151	PICK1	-0.153306	3.85155	-1.06668	0.287755	0.620557
ENSG00000100154	TTC28	0.192587	2.1358	0.913219	0.362527	0.684759
ENSG00000100156	SLC16A8	-0.0572173	0.838716	-0.246714	0.805452	0.930973
ENSG00000100162	CENPM	0.375247	3.41776	1.66966	0.0969789	0.380161
ENSG00000100170	SLC5A1	-0.389286	1.03859	-1.81165	0.071951	0.327433
ENSG00000100196	KDELR3	-0.331211	2.86322	-1.86795	0.0636327	0.309396
ENSG00000100197	CYP2D6	0.0503912	2.49357	0.304004	0.761527	0.912664
ENSG00000100201	DDX17	0.0534982	7.11994	0.47121	0.638144	0.856263
ENSG00000100206	DMC1	-0.0700433	1.07952	-0.308865	0.757833	0.911292
ENSG00000100207	TCF20	-0.0224782	4.0846	-0.28932	0.772718	0.918105
ENSG00000100209	HSCB	0.478673	3.29329	2.68045	0.00813706	0.103006
ENSG00000100211	CBY1	3.76e-05	5.39851	0.000270613	0.999784	0.999794
ENSG00000100216	TOMM22	-0.227842	4.24011	-1.60004	0.111599	0.407823
ENSG00000100218	RSPH14	-0.0114674	3.98062	-0.0429149	0.965824	0.98961
ENSG00000100219	XBP1	0.296301	7.11222	2.17196	0.0313591	0.212145
ENSG00000100220	RTCB	0.446898	4.39664	3.23295	0.00149328	0.0367491
ENSG00000100221	JOSD1	-0.668117	4.85991	-3.03525	0.00281395	0.0550675
ENSG00000100225	FBXO7	0.202055	5.1387	1.78376	0.0763944	0.337149
ENSG00000100226	GTPBP1	-0.102248	6.63394	-0.453878	0.650543	0.86159
ENSG00000100227	POLDIP3	-0.0330469	4.38313	-0.297519	0.766463	0.915103
ENSG00000100228	RAB36	0.222611	5.04665	0.921814	0.358039	0.681082
ENSG00000100234	TIMP3	-0.471802	0.659399	-1.68733	0.0935246	0.373932
ENSG00000100239	PPP6R2	-0.141287	4.39137	-1.77241	0.0782652	0.342789
ENSG00000100241	SBF1	0.00953539	4.8685	0.0845691	0.932712	0.980448
ENSG00000100242	SUN2	-0.247251	6.64053	-1.03915	0.300331	0.633148
ENSG00000100243	CYB5R3	-0.196529	4.91846	-1.8933	0.0601568	0.300365
ENSG00000100246	DNAL4	0.152658	4.2424	1.17199	0.242977	0.578045
[truncated: 13,774 more rows]

## Sheet: final_peds_covid_vs_no
ensembl_ID	gene	logFC	AveExpr	t	P.Value	adj.P.Val
ENSG00000000003	TSPAN6	-1.21592	4.5723	-4.04785	0.00010721	0.00629215
ENSG00000000419	DPM1	-0.393803	3.87373	-0.755925	0.451615	0.68534
ENSG00000000457	SCYL3	-0.409414	2.03338	-1.08415	0.281118	0.534996
ENSG00000000460	C1orf112	-0.52633	0.883734	-0.961532	0.338791	0.590537
ENSG00000000938	FGR	0.242575	1.63988	0.333756	0.739319	0.872359
ENSG00000000971	CFH	0.534316	4.18006	1.41831	0.15946	0.398011
ENSG00000001036	FUCA2	-0.958344	2.90479	-2.22174	0.02874	0.154999
ENSG00000001084	GCLC	-1.09586	6.31691	-4.44997	2.39e-05	0.00235498
ENSG00000001167	NFYA	-1.03904	2.25715	-2.61353	0.0104599	0.0870165
ENSG00000001460	STPG1	-1.12257	2.72545	-2.34559	0.0211339	0.130214
ENSG00000001461	NIPAL3	-0.67099	2.81973	-2.03514	0.044698	0.199033
ENSG00000001497	LAS1L	0.341667	1.04784	0.752868	0.453441	0.686508
ENSG00000001561	ENPP4	-1.40097	3.42537	-3.50821	0.000698478	0.0183716
ENSG00000001617	SEMA3F	1.15696	2.05766	2.21157	0.0294594	0.15689
ENSG00000001626	CFTR	-0.409426	2.59618	-0.572301	0.568506	0.769213
ENSG00000001629	ANKIB1	0.0595403	4.6498	0.195398	0.84551	0.928931
ENSG00000001630	CYP51A1	-1.15504	3.11099	-2.73982	0.00737631	0.0704042
ENSG00000001631	KRIT1	-0.219084	4.54022	-0.469207	0.640026	0.81444
ENSG00000002016	RAD52	0.281592	2.12463	0.610815	0.54282	0.750748
ENSG00000002330	BAD	1.70553	1.99466	2.97491	0.0037383	0.0474935
ENSG00000002549	LAP3	1.42248	6.19626	4.46556	2.25e-05	0.002263
ENSG00000002586	CD99	-0.134882	4.97364	-0.396612	0.692567	0.846098
ENSG00000002587	HS3ST1	0.767804	2.35056	1.57745	0.118106	0.338987
ENSG00000002822	MAD1L1	1.6322	2.12267	2.81931	0.00588692	0.0617006
ENSG00000002834	LASP1	0.25439	4.98785	1.30647	0.194632	0.443291
ENSG00000002919	SNX11	0.224442	4.19021	0.46027	0.646402	0.818379
ENSG00000002933	TMEM176A	1.45359	0.0652457	2.23242	0.028	0.153049
ENSG00000003056	M6PR	0.0510761	4.68049	0.197453	0.843907	0.92751
ENSG00000003096	KLHL13	-0.405861	-1.36148	-0.820048	0.414297	0.656401
ENSG00000003147	ICA1	0.30409	3.7967	0.732847	0.465505	0.696674
ENSG00000003249	DBNDD1	-0.0170559	-1.52128	-0.042981	0.965809	0.984064
ENSG00000003393	ALS2	-0.45145	3.25217	-1.14581	0.254827	0.508717
ENSG00000003400	CASP10	0.897154	2.95133	1.93257	0.056348	0.226148
ENSG00000003402	CFLAR	0.541109	6.94114	2.42176	0.0173955	0.11694
ENSG00000003436	TFPI	-0.174182	3.76071	-0.580789	0.562795	0.765499
ENSG00000003509	NDUFAF7	-1.0357	0.579841	-1.64418	0.103534	0.315077
ENSG00000003756	RBM5	0.363481	5.98034	1.21865	0.226076	0.478836
ENSG00000003987	MTMR7	-1.39425	0.366336	-2.31092	0.0230593	0.136675
ENSG00000003989	SLC7A2	-1.60326	2.1788	-3.40698	0.000973846	0.0218509
ENSG00000004059	ARF5	-0.436548	4.29732	-0.968661	0.33524	0.587013
ENSG00000004139	SARM1	-0.341984	0.492065	-0.637019	0.525685	0.7381
ENSG00000004142	POLDIP2	0.452376	2.82775	1.30147	0.196329	0.444449
ENSG00000004399	PLXND1	0.994206	0.729387	1.63048	0.1064	0.319691
ENSG00000004455	AK2	0.355373	5.67128	1.4804	0.142164	0.373832
ENSG00000004468	CD38	0.842343	4.14495	1.86726	0.0650323	0.243684
ENSG00000004478	FKBP4	-0.121186	3.4793	-0.310674	0.756747	0.881318
ENSG00000004487	KDM1A	-0.490082	3.62183	-1.52174	0.131484	0.357804
ENSG00000004534	RBM6	0.172383	4.55501	0.498991	0.61897	0.801144
ENSG00000004660	CAMKK1	0.652018	-1.59297	1.63789	0.104841	0.31743
ENSG00000004700	RECQL	-0.552081	2.15225	-1.01528	0.312621	0.56661
ENSG00000004766	VPS50	-0.3591	4.01159	-0.784283	0.434878	0.671868
ENSG00000004777	ARHGAP33	0.765817	0.0821172	1.32165	0.189544	0.436216
ENSG00000004779	NDUFAB1	0.0759249	3.60689	0.141935	0.88744	0.949914
ENSG00000004799	PDK4	-2.32431	1.1359	-4.10461	8.72e-05	0.00552953
ENSG00000004809	SLC22A16	-0.197816	-1.03079	-0.398185	0.691411	0.845343
ENSG00000004838	ZMYND10	0.568381	4.51838	1.34111	0.183169	0.428529
ENSG00000004846	ABCB5	-1.19323	-1.03761	-2.16957	0.0326021	0.165678
ENSG00000004848	ARX	-0.700672	-1.81177	-1.63861	0.104691	0.317166
ENSG00000004864	SLC25A13	-0.0729341	3.64411	-0.172171	0.86368	0.936938
ENSG00000004866	ST7	-1.1032	1.6388	-1.80977	0.0735794	0.261995
ENSG00000004897	CDC27	0.0245733	4.43897	0.0665016	0.947122	0.977021
ENSG00000004939	SLC4A1	-0.323706	-1.03055	-0.663619	0.508585	0.726414
ENSG00000004961	HCCS	0.163675	1.77396	0.32275	0.747613	0.877002
ENSG00000004975	DVL2	1.89479	2.16971	3.66963	0.000405875	0.0131195
ENSG00000005001	PRSS22	0.0179227	4.456	0.0370066	0.970559	0.985976
ENSG00000005007	UPF1	0.186087	4.74283	0.538417	0.591582	0.783564
ENSG00000005020	SKAP2	0.964535	2.37667	1.53889	0.127245	0.351891
ENSG00000005022	SLC25A5	0.0421257	6.27139	0.193457	0.847025	0.929845
ENSG00000005059	MCUB	1.32591	2.65139	2.30813	0.0232207	0.137282
ENSG00000005075	POLR2J	0.0241328	1.47556	0.0458816	0.963504	0.983816
ENSG00000005100	DHX33	-0.0619814	-0.0200626	-0.134008	0.893687	0.953173
ENSG00000005108	THSD7A	-1.08421	-1.60241	-2.48554	0.0147312	0.107755
ENSG00000005156	LIG3	-0.250524	3.76716	-0.718146	0.474477	0.704214
ENSG00000005175	RPAP3	-0.634595	3.66741	-1.4889	0.139914	0.370349
ENSG00000005187	ACSM3	-0.98078	3.22716	-1.61186	0.110398	0.326147
ENSG00000005189	REXO5	-1.369	1.38076	-2.21222	0.0294128	0.15689
ENSG00000005194	CIAPIN1	0.0646877	2.14671	0.104376	0.917097	0.964598
ENSG00000005206	SPPL2B	1.41956	3.23538	2.69423	0.00837847	0.0760875
ENSG00000005238	FAM214B	0.284816	0.764548	0.538988	0.59119	0.783403
ENSG00000005243	COPZ2	-0.466183	-1.03333	-0.768818	0.443959	0.679237
ENSG00000005249	PRKAR2B	-1.7809	3.35847	-4.10776	8.62e-05	0.00551528
ENSG00000005302	MSL3	0.854409	4.17317	2.1783	0.0319256	0.163574
ENSG00000005339	CREBBP	-0.117306	5.55361	-0.316976	0.751976	0.87943
ENSG00000005379	TSPOAP1	0.624812	2.34688	1.34344	0.182416	0.427663
ENSG00000005436	GCFC2	-1.44338	2.98275	-2.96687	0.00382852	0.0480684
ENSG00000005448	WDR54	-0.0298787	3.10723	-0.060402	0.951966	0.978713
ENSG00000005469	CROT	-1.03228	2.4041	-2.12302	0.0364222	0.176864
ENSG00000005471	ABCB4	-0.581737	-1.81002	-1.24221	0.2173	0.469145
ENSG00000005483	KMT2E	-0.199274	6.00736	-0.800252	0.425615	0.665179
ENSG00000005486	RHBDD2	-0.375181	4.71097	-1.01144	0.314446	0.568612
ENSG00000005700	IBTK	-0.238859	4.32445	-1.10343	0.272704	0.526753
ENSG00000005801	ZNF195	0.640535	2.66255	1.29926	0.197083	0.445349
ENSG00000005810	MYCBP2	0.755488	4.46145	2.39669	0.0185551	0.121106
ENSG00000005812	FBXL3	-0.121585	4.09867	-0.453576	0.651196	0.821598
ENSG00000005844	ITGAL	1.00538	2.838	1.67343	0.0976201	0.304752
ENSG00000005882	PDK2	-0.696304	1.07389	-1.15366	0.251611	0.50538
ENSG00000005884	ITGA3	0.375113	2.87347	0.868845	0.38718	0.63273
ENSG00000005889	ZFX	-0.471736	4.05233	-1.30072	0.196585	0.444685
ENSG00000005893	LAMP2	-0.366873	4.6655	-1.66138	0.100022	0.309283
ENSG00000005981	ASB4	-0.972244	0.872157	-2.04161	0.0440376	0.196971
ENSG00000006007	GDE1	-0.349411	5.18419	-1.51963	0.132015	0.358573
ENSG00000006015	REX1BD	1.33473	1.46911	2.90114	0.00464581	0.0539673
ENSG00000006016	CRLF1	0.875423	-1.01177	1.56054	0.122046	0.344286
ENSG00000006025	OSBPL7	0.915694	0.101049	1.92012	0.0579231	0.230124
ENSG00000006042	TMEM98	-0.688555	1.99942	-1.23991	0.218144	0.470019
ENSG00000006047	YBX2	0.111535	-1.8304	0.259117	0.796121	0.902017
ENSG00000006062	MAP3K14	1.451	0.194971	2.83953	0.00555481	0.0594201
ENSG00000006118	TMEM132A	0.804741	0.416121	1.25049	0.214273	0.465431
ENSG00000006125	AP2B1	-0.221592	5.59649	-0.82561	0.41115	0.654881
ENSG00000006194	ZNF263	-0.0584099	1.51396	-0.114282	0.909262	0.961154
ENSG00000006210	CX3CL1	1.72841	1.77848	3.33427	0.00123152	0.0251446
ENSG00000006282	SPATA20	0.837908	2.24554	1.62233	0.108135	0.322573
ENSG00000006327	TNFRSF12A	1.58501	-0.0233218	2.65475	0.00934466	0.0815464
ENSG00000006377	DLX6	-0.421495	-0.867603	-0.900518	0.370183	0.619804
ENSG00000006432	MAP3K9	0.143228	0.716982	0.334562	0.738713	0.87226
ENSG00000006451	RALA	-0.0172868	3.5184	-0.0448048	0.964359	0.983964
ENSG00000006453	BAIAP2L1	-0.117919	4.93578	-0.410995	0.682027	0.839482
ENSG00000006459	KDM7A	0.0542473	3.95576	0.219877	0.826451	0.918989
ENSG00000006468	ETV1	-0.950602	-0.788223	-1.62867	0.106783	0.32021
ENSG00000006530	AGK	-0.408809	4.34385	-1.02786	0.306696	0.560934
ENSG00000006534	ALDH3B1	-0.0338484	4.45359	-0.0975917	0.922468	0.967095
ENSG00000006555	TTC22	0.585301	0.803776	1.14293	0.256016	0.509378
ENSG00000006576	PHTF2	-1.51056	2.77797	-3.12753	0.00235696	0.0365916
ENSG00000006607	FARP2	0.496147	4.65893	1.17286	0.243864	0.497303
ENSG00000006611	USH1C	1.38151	0.450272	2.06957	0.041281	0.190448
ENSG00000006625	GGCT	-0.248247	1.13735	-0.381938	0.703383	0.851686
ENSG00000006634	DBF4	-0.455209	2.08676	-0.768335	0.444245	0.679536
ENSG00000006652	IFRD1	-1.24396	5.95337	-3.42582	0.000915879	0.0210905
ENSG00000006659	LGALS14	-0.136773	-2.03974	-0.322557	0.747759	0.877034
ENSG00000006695	COX10	-0.472604	1.64592	-1.0559	0.293762	0.547453
ENSG00000006704	GTF2IRD1	0.456294	2.27152	1.01983	0.310471	0.564469
ENSG00000006712	PAF1	0.101861	3.70991	0.29121	0.771543	0.888666
ENSG00000006715	VPS41	-0.875421	4.44961	-2.19935	0.0303451	0.159349
ENSG00000006740	ARHGAP44	0.436548	1.5919	0.911172	0.364573	0.615677
ENSG00000006744	ELAC2	0.249703	3.55055	0.511381	0.610303	0.795418
ENSG00000006747	SCIN	-0.26918	4.29061	-0.692168	0.490566	0.714881
ENSG00000006756	ARSD	-0.939824	2.11176	-2.35311	0.0207354	0.129154
ENSG00000006757	PNPLA4	-1.14429	1.48635	-2.28242	0.0247564	0.14243
ENSG00000006831	ADIPOR2	-1.13963	3.24461	-2.44337	0.0164484	0.113572
ENSG00000006837	CDKL3	-1.48473	1.38031	-2.53402	0.0129571	0.0992912
ENSG00000007001	UPP2	-0.939695	-1.63399	-1.90518	0.0598627	0.233843
ENSG00000007047	MARK4	0.222624	2.32275	0.45273	0.651803	0.821782
ENSG00000007062	PROM1	-0.307288	6.34946	-0.96116	0.338977	0.590686
ENSG00000007080	CCDC124	1.45939	1.352	2.41893	0.0175233	0.117143
ENSG00000007129	CEACAM21	0.467467	-2.00413	1.05322	0.294982	0.548825
ENSG00000007168	PAFAH1B1	-0.168414	5.40896	-0.872484	0.385203	0.631299
ENSG00000007171	NOS2	1.92799	3.1496	3.72867	0.000331507	0.0117281
ENSG00000007174	DNAH9	-0.247326	4.58637	-0.61269	0.541584	0.750017
ENSG00000007202	KIAA0100	0.04372	4.88965	0.183571	0.854752	0.933256
ENSG00000007216	SLC13A2	-0.123268	-1.53253	-0.285161	0.776158	0.890949
ENSG00000007237	AC005747.1	-0.473763	3.04533	-1.11854	0.266233	0.519483
ENSG00000007255	TRAPPC6A	-0.0820114	-0.06643	-0.129353	0.897359	0.955115
ENSG00000007264	MATK	1.45474	-0.69553	2.81344	0.0059867	0.0625263
ENSG00000007306	CEACAM7	-0.442946	-1.18463	-0.794477	0.428951	0.66823
ENSG00000007312	CD79B	2.01244	-1.66144	3.76196	0.000295486	0.0108922
ENSG00000007341	ST7L	-1.26107	2.80893	-2.20828	0.029696	0.157376
ENSG00000007372	PAX6	-1.03176	2.51496	-2.1404	0.0349528	0.173041
ENSG00000007376	RPUSD1	-0.169685	-0.231131	-0.311024	0.756482	0.881257
ENSG00000007384	RHBDF1	2.18544	0.679265	3.90053	0.000181804	0.00841845
ENSG00000007392	LUC7L	0.243976	3.77794	0.623087	0.53476	0.744971
ENSG00000007516	BAIAP3	0.633817	3.41856	1.20486	0.23133	0.484418
ENSG00000007520	TSR3	1.05456	0.581134	2.04267	0.0439302	0.196744
ENSG00000007541	PIGQ	1.12353	1.87867	2.11214	0.0373686	0.179346
ENSG00000007545	CRAMP1	1.54211	1.10332	3.05973	0.00289854	0.0415301
ENSG00000007866	TEAD3	0.359103	1.11491	0.784892	0.434522	0.671735
ENSG00000007923	DNAJC11	0.802739	2.52538	1.67873	0.0965789	0.302448
ENSG00000007933	FMO3	-0.6754	4.25654	-1.33037	0.186666	0.432834
ENSG00000007944	MYLIP	-0.533712	3.91873	-1.94031	0.0553873	0.223973
ENSG00000007952	NOX1	-0.0147973	-2.09496	-0.0370816	0.9705	0.985976
ENSG00000007968	E2F2	-0.424868	-2.12666	-1.29566	0.198316	0.447122
ENSG00000008018	PSMB1	0.0559168	5.21253	0.209982	0.834143	0.922675
ENSG00000008083	JARID2	0.00250656	2.46342	0.00657017	0.994772	0.99733
ENSG00000008086	CDKL5	-1.37504	3.12994	-3.21048	0.00182256	0.0311671
ENSG00000008118	CAMK1G	-0.518834	-1.30699	-0.909069	0.365676	0.616064
ENSG00000008128	CDK11A	0.606144	2.53604	1.16892	0.245441	0.49834
ENSG00000008130	NADK	1.13814	4.99164	3.03412	0.00313156	0.043131
ENSG00000008226	DLEC1	0.00231903	4.2442	0.00545608	0.995658	0.997814
ENSG00000008256	CYTH3	-0.113587	0.489646	-0.210841	0.833475	0.922324
ENSG00000008277	ADAM22	-0.697583	-1.28827	-1.54856	0.124901	0.349006
ENSG00000008282	SYPL1	-0.578545	5.06995	-2.07108	0.0411362	0.189955
ENSG00000008283	CYB561	0.191729	3.29707	0.525499	0.600494	0.789926
ENSG00000008294	SPAG9	-0.406575	5.95782	-1.64365	0.103643	0.315077
ENSG00000008311	AASS	-1.6065	0.429503	-3.27415	0.00149161	0.0280404
ENSG00000008323	PLEKHG6	0.593752	2.12675	0.943071	0.348101	0.59971
ENSG00000008324	SS18L2	0.242834	2.07561	0.440359	0.660704	0.82711
ENSG00000008382	MPND	0.0751555	-0.444698	0.137398	0.891015	0.951678
ENSG00000008394	MGST1	-1.21791	5.5944	-2.96207	0.00388345	0.0484286
ENSG00000008405	CRY1	-1.13111	2.4538	-2.33503	0.0217043	0.132032
ENSG00000008441	NFIX	0.316072	2.90653	0.734414	0.464554	0.696226
ENSG00000008513	ST3GAL1	0.114119	2.44821	0.239923	0.810921	0.91154
ENSG00000008516	MMP25	0.879101	0.91828	1.25789	0.211599	0.462759
ENSG00000008517	IL32	3.41849	1.89728	4.71062	8.67e-06	0.00117063
ENSG00000008710	PKD1	1.5958	3.7644	3.43985	0.000874839	0.0204896
ENSG00000008838	MED24	0.59271	4.65288	1.48106	0.141989	0.373727
ENSG00000008853	RHOBTB2	1.26906	0.880919	2.39941	0.0184262	0.120709
ENSG00000008869	HEATR5B	-0.771124	4.06945	-1.95878	0.0531496	0.218806
ENSG00000008952	SEC62	-0.11964	5.32764	-0.393443	0.694897	0.84772
ENSG00000008988	RPS20	0.161086	8.73585	0.891807	0.37481	0.623093
ENSG00000009307	CSDE1	-0.165361	7.39118	-1.0728	0.286153	0.540047
ENSG00000009335	UBE3C	-0.652543	4.31522	-2.46956	0.0153619	0.109688
ENSG00000009413	REV3L	-0.705936	4.65282	-1.97842	0.0508563	0.213642
ENSG00000009709	PAX7	-0.711488	0.479607	-1.51781	0.132473	0.359296
ENSG00000009724	MASP2	-0.980848	-1.58994	-2.37333	0.0196972	0.125441
ENSG00000009765	IYD	-0.655814	-1.20043	-1.37518	0.172396	0.415191
ENSG00000009780	FAM76A	-0.0815398	3.32697	-0.20123	0.840961	0.926079
ENSG00000009790	TRAF3IP3	0.396407	3.13915	0.703921	0.48325	0.710229
ENSG00000009830	POMT2	-0.830084	2.69339	-1.4702	0.144901	0.378178
ENSG00000009844	VTA1	-0.800385	3.5852	-1.91968	0.0579793	0.230225
ENSG00000009954	BAZ1B	0.517907	3.22702	2.0032	0.0480824	0.207049
ENSG00000010017	RANBP9	-0.457346	4.35366	-1.66936	0.0984269	0.306261
ENSG00000010030	ETV7	2.23653	0.744588	3.67081	0.000404248	0.0131156
ENSG00000010072	SPRTN	-1.15705	1.28213	-2.4052	0.018154	0.119549
ENSG00000010165	EEF1AKNMT	0.31809	2.11683	0.70042	0.485423	0.711612
ENSG00000010219	DYRK4	0.50369	1.13452	0.783228	0.435494	0.672394
ENSG00000010244	ZNF207	0.0593292	6.74521	0.283042	0.777777	0.891765
ENSG00000010256	UQCRC1	-0.460264	4.71021	-1.1414	0.256649	0.509891
ENSG00000010270	STARD3NL	-0.217687	2.87021	-0.479853	0.632465	0.810191
ENSG00000010278	CD9	-0.815301	6.78048	-3.26836	0.00151921	0.0283497
ENSG00000010282	HHATL	0.0857067	-1.30119	0.168364	0.866665	0.93826
ENSG00000010292	NCAPD2	0.702279	2.66378	1.50617	0.135432	0.363213
ENSG00000010295	IFFO1	0.802898	-0.674531	1.81448	0.0728453	0.260627
ENSG00000010310	GIPR	-0.121893	2.37559	-0.220375	0.826065	0.918773
ENSG00000010318	PHF7	-0.493938	0.855962	-0.811681	0.419058	0.660491
ENSG00000010322	NISCH	0.649724	3.35258	1.50865	0.134795	0.362507
ENSG00000010327	STAB1	1.23146	-0.531448	2.28983	0.0243045	0.140821
ENSG00000010361	FUZ	-0.0471789	2.90262	-0.0995427	0.920923	0.966246
ENSG00000010379	SLC6A13	-0.507771	-1.69528	-1.01944	0.310653	0.564705
ENSG00000010404	IDS	-0.413778	5.45967	-2.1445	0.0346136	0.171931
ENSG00000010438	PRSS3	-0.738551	-1.88674	-1.59733	0.113603	0.331162
ENSG00000010539	ZNF200	-0.358591	1.74165	-0.685253	0.494898	0.71756
ENSG00000010610	CD4	1.26395	2.45789	2.22372	0.0286013	0.154926
ENSG00000010626	LRRC23	0.380219	5.22885	1.03659	0.302627	0.556919
ENSG00000010671	BTK	0.972852	0.925282	1.41696	0.159854	0.398463
ENSG00000010704	HFE	-0.208619	-0.124753	-0.375378	0.708239	0.855197
ENSG00000010803	SCMH1	0.115599	3.23212	0.323989	0.746678	0.876728
ENSG00000010810	FYN	0.848062	3.46381	1.39476	0.166427	0.407451
ENSG00000010818	HIVEP2	0.197061	2.90097	0.496017	0.621059	0.802777
ENSG00000010932	FMO1	-0.0169901	-1.56223	-0.031392	0.975025	0.987661
ENSG00000011007	ELOA	0.59032	2.62939	1.70163	0.0921828	0.295799
ENSG00000011009	LYPLA2	0.497461	3.10976	1.04537	0.298578	0.552829
ENSG00000011021	CLCN6	0.88708	1.42749	1.67283	0.0977387	0.304932
ENSG00000011028	MRC2	0.24868	-1.86118	0.607393	0.545078	0.752037
ENSG00000011105	TSPAN9	-0.430149	-0.481826	-0.820282	0.414164	0.656341
ENSG00000011114	BTBD7	-1.16325	2.92138	-3.79625	0.000262287	0.0103618
ENSG00000011132	APBA3	1.1988	-0.267702	2.43974	0.0166039	0.114408
ENSG00000011143	MKS1	0.00776221	2.47841	0.0149462	0.988107	0.994398
ENSG00000011198	ABHD5	-1.55751	4.43352	-4.14611	7.49e-05	0.00504839
ENSG00000011201	ANOS1	-1.51031	0.210184	-2.79377	0.00633241	0.0644261
ENSG00000011243	AKAP8L	1.62178	4.0546	3.9606	0.000146797	0.00758658
ENSG00000011258	MBTD1	-0.605812	2.25032	-1.35788	0.177804	0.421047
ENSG00000011260	UTP18	-0.841337	3.12351	-1.68067	0.0962005	0.301831
ENSG00000011275	RNF216	-0.48164	3.01016	-1.37172	0.173468	0.416245
ENSG00000011295	TTC19	-0.761192	3.65618	-1.99747	0.048712	0.208444
ENSG00000011304	PTBP1	0.444135	5.75422	1.96075	0.0529154	0.218223
ENSG00000011332	DPF1	0.0256139	-2.06992	0.0757536	0.939779	0.974113
ENSG00000011347	SYT7	0.391559	-0.484589	0.849858	0.397598	0.643004
ENSG00000011376	LARS2	-0.310909	0.951833	-0.663478	0.508675	0.726414
ENSG00000011405	PIK3C2A	-0.607826	3.77444	-2.04777	0.0434173	0.195467
ENSG00000011422	PLAUR	-0.556518	5.00257	-0.822002	0.413189	0.655709
ENSG00000011426	ANLN	-0.394642	1.45765	-0.636646	0.525928	0.738302
ENSG00000011451	WIZ	0.600835	0.393289	1.22584	0.22337	0.475594
ENSG00000011454	RABGAP1	-0.334139	5.00165	-1.01271	0.313841	0.568087
ENSG00000011465	DCN	-0.105353	0.908524	-0.159067	0.873963	0.942615
ENSG00000011478	QPCTL	1.05407	-1.12518	2.33993	0.0214381	0.131439
ENSG00000011485	PPP5C	-0.728564	3.10735	-1.78121	0.0781605	0.270846
ENSG00000011523	CEP68	-0.751881	2.06793	-1.77261	0.0795844	0.273618
ENSG00000011566	MAP4K3	-1.13165	4.39462	-2.50029	0.01417	0.105559
ENSG00000011590	ZBTB32	1.37127	-1.44924	2.52726	0.0131924	0.100477
ENSG00000011600	TYROBP	0.77649	3.9771	1.1706	0.244766	0.498173
ENSG00000011638	TMEM159	0.811762	2.92235	1.86682	0.0650932	0.243749
ENSG00000012048	BRCA1	-0.0958193	1.94258	-0.174142	0.862134	0.936131
ENSG00000012061	ERCC1	-0.267512	3.67242	-0.5927	0.554828	0.759005
ENSG00000012124	CD22	3.27847	0.7885	5.02904	2.41e-06	0.000529547
ENSG00000012171	SEMA3B	0.645871	-1.04128	1.33812	0.184137	0.429853
ENSG00000012174	MBTPS2	-0.429053	0.0586924	-0.922619	0.358606	0.610152
ENSG00000012211	PRICKLE3	2.00363	-0.0682854	4.29921	4.24e-05	0.0033723
ENSG00000012223	LTF	1.12286	1.73429	1.46366	0.146677	0.380058
ENSG00000012232	EXTL3	-0.233155	1.56408	-0.419691	0.675684	0.835744
ENSG00000012660	ELOVL5	-0.192616	5.36865	-0.935655	0.351887	0.604161
ENSG00000012779	ALOX5	1.62124	1.86912	2.18099	0.0317197	0.16286
ENSG00000012817	KDM5D	1.28933	-0.0196443	1.90595	0.0597615	0.233691
ENSG00000012822	CALCOCO1	0.492272	4.29704	1.85491	0.0667935	0.247677
ENSG00000012963	UBR7	-0.744414	2.11812	-1.45621	0.14872	0.382892
ENSG00000012983	MAP4K5	-0.390983	4.43208	-1.33244	0.185988	0.432197
ENSG00000013016	EHD3	0.0274094	-0.901435	0.0599659	0.952312	0.978912
ENSG00000013275	PSMC4	1.27621	3.2865	3.78902	0.000268979	0.0104832
ENSG00000013288	MAN2B2	-0.359141	1.1391	-0.931144	0.354203	0.606174
ENSG00000013293	SLC7A14	-0.87228	-1.26272	-1.57477	0.118724	0.339543
ENSG00000013297	CLDN11	0.101134	-0.943279	0.227119	0.820832	0.916199
ENSG00000013306	SLC25A39	0.91128	3.76881	2.37973	0.0193781	0.124416
ENSG00000013364	MVP	0.351316	5.27864	1.38973	0.167946	0.409696
ENSG00000013374	NUB1	0.910792	5.55797	2.78289	0.00653126	0.0655139
ENSG00000013375	PGM3	-0.357643	3.46424	-0.880562	0.380837	0.627875
ENSG00000013392	RWDD2A	-0.783978	-1.07371	-1.69772	0.0929223	0.296836
ENSG00000013441	CLK1	-0.170857	5.77901	-0.666061	0.507029	0.725172
ENSG00000013503	POLR3B	-0.0728927	0.668027	-0.14585	0.884357	0.948492
ENSG00000013523	ANGEL1	-0.602488	-0.158218	-1.10749	0.270954	0.52508
ENSG00000013561	RNF14	0.202829	4.09157	0.508288	0.612462	0.796983
ENSG00000013563	DNASE1L1	0.2146	0.533612	0.388671	0.698412	0.849435
ENSG00000013573	DDX11	1.88913	3.05794	3.45905	0.000821461	0.0197971
ENSG00000013583	HEBP1	-0.304896	1.95728	-0.488018	0.626692	0.806594
ENSG00000013588	GPRC5A	0.140438	4.13104	0.335207	0.738228	0.872213
ENSG00000013619	MAMLD1	-0.109648	-1.99047	-0.261433	0.79434	0.900886
ENSG00000013725	CD6	1.33793	3.561	2.65757	0.00927227	0.0812187
ENSG00000013810	TACC3	1.63697	1.41138	2.66909	0.00898262	0.0797354
ENSG00000014123	UFL1	-0.469398	2.96215	-1.2604	0.210696	0.461748
ENSG00000014138	POLA2	1.27547	1.55168	2.47249	0.0152447	0.109373
ENSG00000014164	ZC3H3	1.26763	0.610409	2.56654	0.0118775	0.0938536
ENSG00000014216	CAPN1	0.61609	5.73396	2.1516	0.0340331	0.169893
ENSG00000014257	ACPP	-0.0420376	-0.354682	-0.0834194	0.933698	0.971247
ENSG00000014824	SLC30A9	-0.121277	4.31454	-0.551362	0.582715	0.778525
ENSG00000014914	MTMR11	0.309481	-0.47591	0.560568	0.576447	0.774844
ENSG00000014919	COX15	-0.386172	2.80399	-1.00057	0.319644	0.573321
ENSG00000015133	CCDC88C	0.785891	4.88712	2.32631	0.0221861	0.133724
ENSG00000015153	YAF2	-0.117779	3.41203	-0.223051	0.823988	0.917596
ENSG00000015171	ZMYND11	-0.398703	4.02959	-1.26613	0.208647	0.459232
ENSG00000015285	WAS	1.61274	1.69515	2.32641	0.0221807	0.133724
ENSG00000015475	BID	-0.0175585	3.61065	-0.0362897	0.97113	0.98606
ENSG00000015479	MATR3	-0.288871	6.25226	-1.47684	0.143115	0.375567
ENSG00000015532	XYLT2	-0.493846	0.851433	-1.27872	0.204193	0.453877
ENSG00000015568	RGPD5	-1.06772	4.35788	-1.61436	0.109854	0.32532
ENSG00000015592	STMN4	-0.567049	-1.91926	-1.16506	0.24699	0.499995
ENSG00000015676	NUDCD3	0.729076	3.29864	1.6717	0.0979629	0.30544
ENSG00000016082	ISL1	0.464875	-0.782848	0.865598	0.38895	0.634583
ENSG00000016391	CHDH	-0.683289	-1.68125	-1.888	0.0621596	0.237923
ENSG00000016402	IL20RA	-2.14257	1.38834	-3.95612	0.000149165	0.00761913
ENSG00000016602	CLCA4	-1.2689	1.92505	-2.12588	0.036177	0.176438
ENSG00000016864	GLT8D1	-0.486696	4.07356	-1.09918	0.27454	0.528401
ENSG00000017260	ATP2C1	-0.319017	5.53754	-1.09731	0.275353	0.529071
ENSG00000017427	IGF1	0.986232	-0.150331	1.91516	0.058561	0.231569
ENSG00000017483	SLC38A5	1.99197	-0.822439	3.4834	0.000758199	0.0192409
ENSG00000017797	RALBP1	0.123769	3.66587	0.47797	0.633799	0.811124
ENSG00000018189	RUFY3	-0.687584	4.43773	-1.83544	0.069654	0.253782
ENSG00000018280	SLC11A1	-1.27689	2.5954	-1.81202	0.0732272	0.261306
ENSG00000018408	WWTR1	-0.533067	4.19707	-1.46718	0.145719	0.378517
ENSG00000018510	AGPS	-0.758385	3.35681	-2.01364	0.0469528	0.204609
ENSG00000018610	CXorf56	0.107594	1.62568	0.217554	0.828256	0.92038
ENSG00000018699	TTC27	-1.50834	1.8591	-2.78332	0.00652346	0.0655139
ENSG00000018869	ZNF582	-0.585626	-1.20011	-1.07863	0.283555	0.537623
ENSG00000019102	VSIG2	-0.274569	1.90991	-0.472749	0.637506	0.813099
ENSG00000019144	PHLDB1	-0.514215	-0.0253761	-1.06146	0.291243	0.545457
ENSG00000019186	CYP24A1	0.0335892	1.62594	0.0510643	0.959384	0.981754
ENSG00000019485	PRDM11	1.09273	0.17555	2.36291	0.0202263	0.127439
ENSG00000019549	SNAI2	-1.08874	-1.76597	-2.59275	0.0110668	0.0900928
ENSG00000019582	CD74	1.54063	8.37721	4.84343	5.11e-06	0.00086188
ENSG00000019991	HGF	-0.351891	-2.18424	-0.910041	0.365166	0.615783
ENSG00000019995	ZRANB1	-0.713621	2.1595	-1.73954	0.0852657	0.284016
ENSG00000020129	NCDN	1.3284	1.00641	2.71642	0.00787618	0.0731555
ENSG00000020181	ADGRA2	0.524582	-2.16353	1.32667	0.187884	0.433864
ENSG00000020256	ZFP64	-0.967518	1.72073	-2.09001	0.0393608	0.184894
ENSG00000020426	MNAT1	0.332866	3.70115	0.557939	0.578234	0.775504
ENSG00000020577	SAMD4A	1.66225	2.00857	3.47683	0.000774787	0.0193412
ENSG00000020633	RUNX3	1.36411	2.66943	2.7048	0.00813568	0.0747957
ENSG00000020922	MRE11	-0.938252	2.66346	-2.07897	0.0403882	0.187601
ENSG00000021300	PLEKHB1	-0.0679365	2.60799	-0.13447	0.893323	0.95292
ENSG00000021355	SERPINB1	0.28025	6.11499	1.1086	0.270478	0.524826
ENSG00000021574	SPAST	-0.76282	3.71288	-2.37866	0.0194311	0.124603
ENSG00000021645	NRXN3	-1.15232	-0.709368	-2.22893	0.0282403	0.153857
ENSG00000021762	OSBPL5	0.920854	2.24291	1.83792	0.0692831	0.252777
ENSG00000021776	AQR	-0.905894	3.22793	-2.46227	0.0156577	0.110917
ENSG00000021826	CPS1	-0.776412	-1.56333	-1.78931	0.0768377	0.268347
ENSG00000022267	FHL1	-1.80816	-0.316289	-2.98496	0.00362813	0.0465683
ENSG00000022277	RTF2	0.420901	4.41792	1.53509	0.128174	0.353551
ENSG00000022556	NLRP2	-0.0376892	1.02133	-0.0617004	0.950935	0.978392
ENSG00000022567	SLC45A4	-0.683046	3.58799	-1.69958	0.0925709	0.296391
ENSG00000022840	RNF10	-0.0662852	6.38104	-0.312976	0.755004	0.880944
ENSG00000022976	ZNF839	-0.459135	1.54599	-0.888284	0.376692	0.624316
ENSG00000023041	ZDHHC6	0.0882252	2.40892	0.151002	0.880303	0.946181
ENSG00000023171	GRAMD1B	1.18465	2.18667	2.45013	0.0161617	0.112868
ENSG00000023191	RNH1	0.410369	4.27035	1.58885	0.115507	0.33456
ENSG00000023228	NDUFS1	-0.218265	4.41685	-0.781608	0.436441	0.673101
ENSG00000023287	RB1CC1	-0.79184	4.65149	-3.55878	0.000590247	0.0165579
ENSG00000023318	ERP44	-0.773593	2.65009	-2.33579	0.0216627	0.13194
ENSG00000023330	ALAS1	0.301878	3.92759	0.958831	0.340143	0.591722
ENSG00000023445	BIRC3	1.18888	3.67127	2.68981	0.00848183	0.0765615
ENSG00000023516	AKAP11	-0.49147	3.43433	-1.72918	0.0871128	0.286977
ENSG00000023572	GLRX2	-0.271862	1.57289	-0.475432	0.6356	0.812122
ENSG00000023608	SNAPC1	-0.826732	1.42698	-1.488	0.140153	0.370784
ENSG00000023697	DERA	-1.68696	3.13471	-3.14515	0.00223252	0.0351334
ENSG00000023734	STRAP	0.119953	4.59338	0.386242	0.700204	0.850313
ENSG00000023839	ABCC2	-2.21833	0.0156599	-4.00057	0.00012718	0.00693839
ENSG00000023892	DEF6	1.35139	1.11874	2.6286	0.0100389	0.0845482
ENSG00000023902	PLEKHO1	2.96555	2.06477	5.42962	4.53e-07	0.000183038
ENSG00000023909	GCLM	-1.03045	4.92096	-3.79078	0.00026733	0.0104735
ENSG00000024048	UBR2	0.0845067	3.57974	0.326617	0.744696	0.875844
ENSG00000024422	EHD2	0.49377	-0.573867	0.939913	0.34971	0.60172
ENSG00000024526	DEPDC1	-1.00178	-1.12034	-1.77931	0.0784739	0.271484
ENSG00000024862	CCDC28A	0.0654073	2.81662	0.14506	0.884979	0.948686
ENSG00000025039	RRAGD	-1.32856	3.46503	-3.69228	0.000375643	0.0125834
ENSG00000025156	HSF2	-0.415276	1.80611	-0.736551	0.463259	0.69533
ENSG00000025293	PHF20	0.0808859	4.77942	0.275893	0.783246	0.894472
ENSG00000025434	NR1H3	1.19678	2.02717	2.17678	0.0320427	0.163893
ENSG00000025708	TYMP	2.50889	5.37993	5.30578	7.64e-07	0.000233335
ENSG00000025770	NCAPH2	1.89111	1.63227	3.95819	0.000148067	0.00758896
ENSG00000025772	TOMM34	0.386677	1.87551	0.796615	0.427714	0.667204
ENSG00000025796	SEC63	-0.479437	4.90757	-1.52147	0.131553	0.357804
ENSG00000025800	KPNA6	-0.766462	3.5608	-2.75681	0.00703184	0.0683367
ENSG00000026025	VIM	0.135365	5.87986	0.449574	0.654069	0.823473
ENSG00000026036	RTEL1-TNFRSF6B	0.526785	-1.89849	1.87366	0.0641345	0.241895
ENSG00000026103	FAS	0.843197	3.45636	1.61877	0.1089	0.323759
ENSG00000026297	RNASET2	1.43009	3.88926	3.05923	0.00290286	0.0415301
ENSG00000026508	CD44	-0.384328	7.47793	-1.35515	0.178668	0.422396
ENSG00000026652	AGPAT4	-0.236761	0.509988	-0.488962	0.626026	0.806276
ENSG00000026751	SLAMF7	2.38262	2.18532	3.65539	0.000426062	0.0134808
ENSG00000026950	BTN3A1	1.94829	3.13099	3.93494	0.000160881	0.00789425
ENSG00000027001	MIPEP	-0.939678	3.73112	-1.99123	0.0494052	0.210236
ENSG00000027075	PRKCH	-0.226025	5.71195	-0.5216	0.603195	0.791817
ENSG00000027697	IFNGR1	-0.33938	5.10547	-1.13654	0.258665	0.512196
ENSG00000027847	B4GALT7	0.876385	0.498327	1.58366	0.116685	0.336281
ENSG00000027869	SH2D2A	2.96316	-0.643965	5.94694	4.81e-08	3.85e-05
ENSG00000028116	VRK2	0.27443	4.39664	0.951269	0.343946	0.595087
ENSG00000028137	TNFRSF1B	0.453779	2.24706	0.654327	0.514525	0.730502
ENSG00000028203	VEZT	-0.264853	4.63335	-0.783945	0.435075	0.672103
ENSG00000028277	POU2F2	0.839585	1.08857	1.33284	0.185859	0.432054
ENSG00000028310	BRD9	0.919504	3.21964	1.89987	0.0605649	0.235319
ENSG00000028528	SNX1	0.0134999	4.60419	0.0451033	0.964122	0.983964
ENSG00000028839	TBPL1	0.205457	3.5952	0.356227	0.722481	0.862873
ENSG00000029153	ARNTL2	0.199882	3.73238	0.510787	0.610717	0.795681
ENSG00000029363	BCLAF1	-0.458468	6.16249	-2.13481	0.0354198	0.174418
ENSG00000029364	SLC39A9	-0.434866	3.95971	-1.68503	0.0953538	0.3005
ENSG00000029534	ANK1	0.388232	-1.98428	1.01009	0.315087	0.569388
ENSG00000029639	TFB1M	-0.777679	1.43021	-1.23548	0.219779	0.472182
ENSG00000029725	RABEP1	0.0116337	4.16914	0.0372214	0.970389	0.985976
ENSG00000029993	HMGB3	-0.0956373	2.69623	-0.166614	0.868038	0.938754
ENSG00000030066	NUP160	-0.228348	4.10243	-0.685244	0.494903	0.71756
ENSG00000030110	BAK1	1.42941	0.701894	2.8214	0.00585179	0.0615014
ENSG00000030419	IKZF2	0.318147	5.14651	0.993296	0.323157	0.576444
ENSG00000030582	GRN	0.855003	4.89282	1.96227	0.0527364	0.2179
ENSG00000031003	FAM13B	0.170441	4.80012	0.76458	0.446468	0.680715
ENSG00000031081	ARHGAP31	1.13549	-0.162019	2.27917	0.0249564	0.143048
ENSG00000031691	CENPQ	-0.62931	-0.01401	-1.02305	0.308952	0.563052
ENSG00000031698	SARS1	0.372916	3.7546	0.953618	0.342762	0.594206
ENSG00000031823	RANBP3	0.220208	4.37491	0.447827	0.655325	0.82396
ENSG00000032219	ARID4A	0.0282962	3.42529	0.0729737	0.941985	0.975087
ENSG00000032389	EIPR1	0.031537	3.06704	0.0673197	0.946473	0.976745
ENSG00000032444	PNPLA6	0.87768	3.12001	1.73453	0.0861543	0.285515
ENSG00000032742	IFT88	-1.12077	4.42173	-3.52492	0.000660803	0.017819
ENSG00000033011	ALG1	0.0408352	1.52336	0.0761431	0.93947	0.974113
ENSG00000033030	ZCCHC8	-0.377702	3.24707	-1.0656	0.289379	0.542804
ENSG00000033050	ABCF2	0.204576	0.472634	0.36915	0.712859	0.85823
ENSG00000033100	CHPF2	1.2548	0.658669	2.582	0.011393	0.0916212
ENSG00000033122	LRRC7	-0.762748	-1.96544	-1.71792	0.089157	0.290956
ENSG00000033170	FUT8	-0.464244	3.86898	-1.02562	0.307745	0.562114
ENSG00000033178	UBA6	-0.00588167	5.42035	-0.017824	0.985818	0.993318
ENSG00000033327	GAB2	-0.166123	2.57016	-0.300266	0.764648	0.885784
ENSG00000033627	ATP6V0A1	-0.122758	3.69563	-0.2378	0.812562	0.911969
ENSG00000033800	PIAS1	-0.164333	4.91973	-0.530205	0.59724	0.787932
ENSG00000033867	SLC4A7	-0.19027	2.84171	-0.445776	0.656801	0.825077
ENSG00000034053	APBA2	1.01624	-1.94778	2.74983	0.00717163	0.0692009
ENSG00000034152	MAP2K3	0.675405	4.91053	2.13029	0.0358008	0.175392
ENSG00000034239	EFCAB1	-0.632918	4.88496	-1.32682	0.187835	0.433864
ENSG00000034510	TMSB10	1.43253	8.85116	6.91357	5.97e-10	2.23e-06
ENSG00000034533	ASTE1	-1.01485	-0.205137	-1.92159	0.0577355	0.229867
ENSG00000034677	RNF19A	0.287327	5.78832	1.06054	0.291658	0.545869
ENSG00000034693	PEX3	-0.801827	1.73538	-1.49752	0.137663	0.366476
ENSG00000034713	GABARAPL2	-0.704227	5.9532	-2.60222	0.0107865	0.0887472
ENSG00000035115	SH3YL1	-0.61535	4.53101	-1.59253	0.114678	0.333321
ENSG00000035141	FAM136A	-0.364796	2.94171	-0.959321	0.339898	0.591662
ENSG00000035403	VCL	0.157923	3.08768	0.33104	0.741363	0.873383
ENSG00000035499	DEPDC1B	0.300657	-1.91701	0.683907	0.495743	0.71795
ENSG00000035664	DAPK2	0.0147761	2.09819	0.0277529	0.977919	0.989088
ENSG00000035681	NSMAF	-1.02128	5.72729	-2.73039	0.00757417	0.0713823
ENSG00000035687	ADSS2	-0.222172	5.4846	-0.988324	0.325572	0.578507
ENSG00000035720	STAP1	2.28793	1.02671	3.94772	0.000153708	0.00774568
ENSG00000035862	TIMP2	0.288768	1.32498	0.528618	0.598336	0.788752
ENSG00000035928	RFC1	-0.286517	5.30275	-1.04723	0.297723	0.551931
ENSG00000036054	TBC1D23	-0.15657	3.12507	-0.355074	0.723342	0.863281
ENSG00000036257	CUL3	-0.551931	6.0928	-2.22011	0.0288543	0.155392
ENSG00000036448	MYOM2	0.386242	-1.2794	0.667247	0.506276	0.72444
ENSG00000036530	CYP46A1	-0.931525	2.67441	-2.34746	0.021034	0.12984
ENSG00000036549	AC118549.1	-0.319265	3.9294	-0.84788	0.398693	0.643821
ENSG00000036565	SLC18A1	-0.813919	-2.13273	-2.15377	0.0338578	0.169501
ENSG00000036672	USP2	-0.470639	2.47576	-0.89094	0.375273	0.623621
ENSG00000036828	CASR	0.0958988	-1.29541	0.222768	0.824207	0.917596
ENSG00000037042	TUBG2	0.476685	-0.741079	1.0189	0.310909	0.564896
ENSG00000037241	RPL26L1	-0.42745	2.48215	-0.751821	0.454067	0.687176
ENSG00000037280	FLT4	-0.300171	-2.19727	-1.02644	0.307361	0.561906
ENSG00000037474	NSUN2	-0.0337418	3.44041	-0.102044	0.918943	0.965455
ENSG00000037637	FBXO42	-0.71081	1.62082	-1.66371	0.0995534	0.308561
ENSG00000037749	MFAP3	-1.23271	3.2824	-2.42404	0.0172932	0.116674
ENSG00000037757	MRI1	0.0754598	0.262956	0.158837	0.874144	0.942743
ENSG00000037897	METTL1	-0.849631	-0.604682	-1.46798	0.145502	0.378517
ENSG00000038002	AGA	-1.35138	1.8721	-2.44924	0.0161991	0.112885
ENSG00000038210	PI4K2B	-0.268837	3.34299	-0.662613	0.509226	0.726855
ENSG00000038219	BOD1L1	-0.0722741	3.96853	-0.280668	0.779592	0.892615
ENSG00000038274	MAT2B	-0.168225	5.60639	-0.834889	0.405931	0.649555
ENSG00000038358	EDC4	0.493311	2.77588	1.12702	0.26265	0.516021
ENSG00000038382	TRIO	0.327071	5.03792	1.11416	0.268095	0.521486
ENSG00000038427	VCAN	-1.13232	1.83952	-2.04816	0.0433778	0.195447
ENSG00000038532	CLEC16A	0.76373	4.11236	2.6968	0.00831893	0.0757767
ENSG00000038945	MSR1	0.739638	3.64537	1.74389	0.0845	0.282472
ENSG00000039068	CDH1	-0.292111	5.31638	-1.07271	0.286191	0.540049
ENSG00000039123	MTREX	-0.224515	4.37835	-0.606046	0.545968	0.752321
ENSG00000039139	DNAH5	-0.68298	4.66627	-1.61853	0.108953	0.323852
ENSG00000039319	ZFYVE16	-0.588738	4.75907	-1.57189	0.11939	0.340471
ENSG00000039523	RIPOR1	2.04778	2.84662	4.09459	9.04e-05	0.00565378
ENSG00000039560	RAI14	-0.614001	4.55729	-1.76209	0.0813571	0.27689
ENSG00000039650	PNKP	1.9698	3.21591	3.78375	0.000273952	0.0105413
ENSG00000040199	PHLPP2	0.422924	0.566772	0.887325	0.377205	0.624538
ENSG00000040275	SPDL1	-1.0632	1.97132	-1.94706	0.0545607	0.222313
ENSG00000040341	STAU2	-0.218862	5.72421	-0.830538	0.408373	0.65192
ENSG00000040487	SLC66A1	0.355884	-0.815918	0.74387	0.45884	0.690706
ENSG00000040531	CTNS	-0.0625988	2.68287	-0.109067	0.913385	0.96286
ENSG00000040633	PHF23	0.995343	2.41322	2.1141	0.0371972	0.179007
ENSG00000040933	INPP4A	1.06236	2.65018	2.59209	0.0110866	0.090175
ENSG00000041353	RAB27B	-0.0937348	2.27833	-0.215687	0.829707	0.92068
ENSG00000041357	PSMA4	0.333734	6.70842	1.41973	0.159048	0.397646
ENSG00000041515	MYO16	-0.505984	-1.93712	-1.40306	0.163945	0.404297
ENSG00000041802	LSG1	-0.577675	3.98464	-1.31029	0.193342	0.441158
ENSG00000041880	PARP3	1.50067	1.96341	2.99044	0.00356943	0.0462913
ENSG00000041982	TNC	-0.233204	2.10569	-0.38401	0.701852	0.85114
ENSG00000041988	THAP3	1.20681	-0.504209	2.27021	0.0255166	0.145037
ENSG00000042062	RIPOR3	0.719051	0.688272	1.36678	0.175007	0.418601
ENSG00000042088	TDP1	-0.181855	3.21988	-0.394604	0.694044	0.847207
ENSG00000042286	AIFM2	0.260091	-0.791386	0.63113	0.529512	0.741305
ENSG00000042304	C2orf83	-0.208053	-1.67793	-0.438761	0.661858	0.827516
ENSG00000042317	AL049834.1	-1.88863	2.68657	-3.76772	0.000289641	0.010783
ENSG00000042429	MED17	-0.0933713	3.44924	-0.233743	0.815701	0.913551
ENSG00000042445	RETSAT	-0.0413794	2.40144	-0.09189	0.926984	0.969005
ENSG00000042493	CAPG	3.11976	3.21518	6.76173	1.21e-09	3.61e-06
ENSG00000042753	AP2S1	-0.381308	4.43894	-0.890428	0.375546	0.623756
ENSG00000042832	TG	0.0590261	-0.345474	0.0892095	0.929108	0.969803
ENSG00000042980	ADAM28	0.514621	6.23896	1.71958	0.0888537	0.290336
ENSG00000043039	BARX2	-0.924441	-0.952451	-1.97084	0.0517306	0.215475
ENSG00000043093	DCUN1D1	0.268093	4.55444	0.849079	0.398029	0.643294
ENSG00000043143	JADE2	0.752851	3.175	1.91206	0.0589624	0.232097
ENSG00000043462	LCP2	0.0910517	5.94115	0.143937	0.885864	0.94909
ENSG00000043514	TRIT1	-0.510386	1.92832	-0.887129	0.37731	0.624538
ENSG00000043591	ADRB1	-0.83971	0.946731	-1.84705	0.0679368	0.250183
ENSG00000044090	CUL7	0.295189	0.364147	0.639692	0.523954	0.73726
ENSG00000044115	CTNNA1	0.0381512	7.78208	0.201839	0.840486	0.925858
ENSG00000044446	PHKA2	0.932272	1.5315	1.6811	0.096117	0.301831
ENSG00000044459	CNTLN	-1.2416	1.75535	-2.71813	0.00783876	0.0730497
ENSG00000044574	HSPA5	0.15614	5.31552	0.712229	0.478115	0.706926
ENSG00000046604	DSG2	-1.18561	2.08363	-2.65303	0.00938884	0.0817889
ENSG00000046647	GEMIN8	0.419406	2.32777	0.770263	0.443106	0.678695
ENSG00000046651	OFD1	-0.241385	4.26784	-0.563278	0.574608	0.77404
ENSG00000046653	GPM6B	-1.46478	1.62157	-2.42953	0.0170493	0.115666
ENSG00000046889	PREX2	-1.18061	-1.89306	-2.89254	0.00476394	0.0547177
ENSG00000047056	WDR37	-0.519808	2.17286	-1.12972	0.261515	0.514825
ENSG00000047188	YTHDC2	-0.291666	3.26153	-0.727305	0.468876	0.699342
ENSG00000047230	CTPS2	-1.35802	1.46005	-2.75887	0.00699101	0.0680726
ENSG00000047249	ATP6V1H	-0.213754	4.43202	-0.474179	0.636489	0.812553
ENSG00000047315	POLR2B	-0.189423	4.78825	-0.700697	0.485251	0.711498
ENSG00000047346	FAM214A	-0.107694	5.72567	-0.292866	0.77028	0.888666
ENSG00000047365	ARAP2	0.254961	5.65268	0.862277	0.390765	0.635987
ENSG00000047410	TPR	0.0435096	5.15191	0.179336	0.858066	0.934698
ENSG00000047457	CP	-0.562093	6.72862	-2.0386	0.044344	0.197928
ENSG00000047578	KIAA0556	0.274705	4.9902	0.83615	0.405225	0.649188
ENSG00000047579	DTNBP1	0.423749	1.87013	0.707918	0.480776	0.708659
ENSG00000047597	XK	-1.02237	-1.75966	-2.4498	0.0161753	0.112877
ENSG00000047621	C12orf4	-0.590359	2.95201	-1.16789	0.245852	0.498634
ENSG00000047634	SCML1	-0.824816	0.549094	-1.48943	0.139776	0.37018
ENSG00000047644	WWC3	-0.478146	1.40154	-1.2321	0.221033	0.473516
ENSG00000047648	ARHGAP6	-0.625166	-1.21959	-1.32072	0.189854	0.436499
ENSG00000047849	MAP4	0.00150493	3.73948	0.00653769	0.994798	0.99733
ENSG00000047932	GOPC	-0.41672	1.46292	-0.917482	0.361276	0.61212
ENSG00000048028	USP28	-0.220951	3.699	-0.461419	0.645581	0.818029
ENSG00000048052	HDAC9	0.221507	3.65498	0.422521	0.673626	0.834974
ENSG00000048140	TSPAN17	0.403417	0.958743	0.802764	0.424169	0.66422
ENSG00000048162	NOP16	0.349842	0.0898135	0.623982	0.534175	0.744502
ENSG00000048342	CC2D2A	-0.897395	5.91903	-2.55619	0.012212	0.0958386
ENSG00000048392	RRM2B	-0.34203	3.54855	-0.884203	0.378879	0.626345
ENSG00000048405	ZNF800	-0.668486	4.04991	-1.79919	0.0752495	0.265109
ENSG00000048471	SNX29	0.476855	2.90424	1.2455	0.216094	0.467969
ENSG00000048540	LMO3	-1.45919	-0.713264	-2.76465	0.00687773	0.0674522
ENSG00000048544	MRPS10	-0.260581	2.44499	-0.572926	0.568085	0.769129
ENSG00000048649	RSF1	0.309081	5.10315	1.30464	0.195252	0.443757
ENSG00000048707	VPS13D	-0.181638	4.5126	-0.638224	0.524905	0.737696
ENSG00000048740	CELF2	0.391057	3.00565	0.828538	0.409498	0.652807
ENSG00000048828	FAM120A	-0.0741381	5.31589	-0.420924	0.674787	0.835165
ENSG00000048991	R3HDM1	-0.361391	3.92515	-0.95016	0.344507	0.595575
ENSG00000049089	COL9A2	1.71788	0.246983	3.59776	0.000517848	0.0153164
ENSG00000049130	KITLG	-0.403234	2.75353	-0.969333	0.334907	0.586918
ENSG00000049167	ERCC8	-0.997205	1.22569	-1.69735	0.0929919	0.296931
ENSG00000049239	H6PD	-0.336385	1.91266	-1.03884	0.301584	0.555851
ENSG00000049245	VAMP3	-0.165163	5.12773	-0.568431	0.571119	0.77117
ENSG00000049246	PER3	-0.439652	2.91596	-1.03308	0.304261	0.55831
ENSG00000049249	TNFRSF9	-0.0916658	-0.629146	-0.185869	0.852955	0.932582
ENSG00000049283	EPN3	0.715602	2.88408	1.46004	0.147665	0.381159
ENSG00000049323	LTBP1	-0.256635	-0.217277	-0.46406	0.643695	0.816511
ENSG00000049449	RCN1	-0.313668	2.80356	-0.642449	0.52217	0.735735
ENSG00000049540	ELN	-0.545337	3.11647	-1.16449	0.247221	0.50023
ENSG00000049541	RFC2	1.06801	1.11708	1.91739	0.0582743	0.231151
ENSG00000049618	ARID1B	-0.453062	5.29765	-2.01017	0.0473254	0.205506
ENSG00000049656	CLPTM1L	0.419757	4.3807	1.20695	0.23053	0.483712
ENSG00000049759	NEDD4L	-0.588665	5.95771	-2.00448	0.0479422	0.206714
ENSG00000049768	FOXP3	0.430241	-1.95378	1.04334	0.299509	0.553936
ENSG00000049769	PPP1R3F	-0.342191	-0.976837	-0.680809	0.497693	0.719172
ENSG00000049860	HEXB	-0.237006	4.61882	-0.65487	0.514177	0.7303
ENSG00000049883	PTCD2	-1.20231	0.150713	-2.09866	0.0385717	0.182897
ENSG00000050030	NEXMIF	-1.118	-0.793313	-2.256	0.0264265	0.147873
ENSG00000050130	JKAMP	-0.501139	3.77162	-0.910518	0.364916	0.615677
ENSG00000050165	DKK3	0.233027	-1.30626	0.423922	0.672607	0.834334
ENSG00000050327	ARHGEF5	0.340925	2.58779	0.928066	0.355788	0.607707
ENSG00000050344	NFE2L3	0.127803	3.86933	0.226956	0.820959	0.916217
ENSG00000050393	MCUR1	-0.451699	1.72976	-0.950547	0.344311	0.595374
ENSG00000050405	LIMA1	0.107736	5.23177	0.413337	0.680316	0.838476
ENSG00000050426	LETMD1	-1.18124	3.29347	-2.30552	0.0233728	0.137661
ENSG00000050438	SLC4A8	-0.80013	2.06037	-1.55918	0.122369	0.344885
ENSG00000050730	TNIP3	0.0487134	0.949961	0.0773828	0.938486	0.974021
ENSG00000050748	MAPK9	-0.674886	4.0545	-2.26058	0.0261305	0.146902
ENSG00000050820	BCAR1	0.651607	1.74768	1.22455	0.223853	0.476047
ENSG00000051009	FAM160A2	0.367049	1.17484	0.735491	0.463901	0.69575
ENSG00000051108	HERPUD1	0.281844	5.52977	0.841029	0.4025	0.646749
ENSG00000051128	HOMER3	0.259021	0.46678	0.448135	0.655103	0.82382
ENSG00000051180	RAD51	-0.0258687	-1.52125	-0.0555644	0.955809	0.98014
ENSG00000051341	POLQ	-0.921728	-0.0589801	-1.96841	0.0520139	0.216113
ENSG00000051382	PIK3CB	0.0119232	3.66143	0.036468	0.970988	0.98606
ENSG00000051523	CYBA	0.687936	5.69381	2.15048	0.0341245	0.170122
ENSG00000051596	THOC3	-0.259914	4.73044	-0.612427	0.541758	0.750023
ENSG00000051620	HEBP2	-0.600043	4.02913	-1.58709	0.115905	0.335067
ENSG00000051825	MPHOSPH9	-0.233023	3.74495	-0.52685	0.599559	0.789529
ENSG00000052126	PLEKHA5	-0.605265	5.43206	-1.9818	0.0504691	0.21282
ENSG00000052344	PRSS8	0.452452	2.53948	0.988209	0.325628	0.578507
ENSG00000052723	SIKE1	-0.240741	2.78103	-0.593273	0.554446	0.758764
ENSG00000052749	RRP12	-0.617759	3.33366	-1.51352	0.133555	0.360337
ENSG00000052795	FNIP2	-0.165209	2.77053	-0.352538	0.725236	0.864427
ENSG00000052802	MSMO1	-1.84685	3.27796	-3.49267	0.000735328	0.0189088
ENSG00000052841	TTC17	-0.111345	4.47902	-0.278834	0.780995	0.893056
ENSG00000053108	FSTL4	0.496457	-1.16201	0.974618	0.332291	0.584517
ENSG00000053254	FOXN3	-0.207914	6.16067	-0.683956	0.495712	0.71795
ENSG00000053371	AKR7A2	0.462489	1.5835	0.732166	0.465918	0.696875
ENSG00000053372	MRTO4	0.563203	0.163537	1.06016	0.29183	0.545933
ENSG00000053438	NNAT	-0.294042	-1.04666	-0.578233	0.564512	0.766929
ENSG00000053501	USE1	0.278053	0.599823	0.456616	0.649018	0.819748
ENSG00000053524	MCF2L2	-0.615604	2.11434	-1.34233	0.182774	0.428073
ENSG00000053702	NRIP2	0.56724	-1.60853	1.31608	0.191398	0.438431
ENSG00000053747	LAMA3	0.205855	1.2841	0.388031	0.698885	0.849607
ENSG00000053770	AP5M1	-0.67377	4.41497	-2.04929	0.0432655	0.195269
ENSG00000053900	ANAPC4	-0.677232	3.95879	-1.29258	0.199375	0.448226
ENSG00000053918	KCNQ1	0.820794	1.27124	1.50095	0.136775	0.365059
ENSG00000054116	TRAPPC3	0.0877861	3.06599	0.213632	0.831304	0.921076
ENSG00000054118	THRAP3	-0.0738692	5.14196	-0.352878	0.724982	0.864273
ENSG00000054148	PHPT1	0.602687	1.35891	0.868358	0.387445	0.633025
ENSG00000054179	ENTPD2	0.470418	-2.20325	1.33837	0.184057	0.429761
ENSG00000054219	LY75	-0.801007	3.41157	-2.37298	0.0197146	0.125446
ENSG00000054267	ARID4B	0.526572	5.07913	2.21163	0.0294555	0.15689
ENSG00000054277	OPN3	-0.0254177	-0.0957937	-0.0453535	0.963923	0.983964
ENSG00000054282	SDCCAG8	0.334117	3.59426	0.697948	0.48696	0.712485
ENSG00000054392	HHAT	0.12082	0.294323	0.247915	0.80475	0.90815
ENSG00000054523	KIF1B	-0.230583	3.74936	-0.718189	0.474451	0.704214
ENSG00000054598	FOXC1	-0.656499	1.58608	-1.4912	0.139311	0.369471
ENSG00000054611	TBC1D22A	1.161	2.37521	2.93603	0.00419394	0.0506181
ENSG00000054654	SYNE2	-0.0543562	6.34778	-0.257521	0.797349	0.902861
ENSG00000054690	PLEKHH1	0.0514385	4.35656	0.119101	0.905454	0.958957
ENSG00000054793	ATP9A	-0.311729	2.43758	-0.929423	0.355089	0.607205
ENSG00000054965	FAM168A	0.179999	2.67022	0.467472	0.641261	0.81525
ENSG00000054967	RELT	1.06175	0.853114	1.7575	0.0821398	0.278371
ENSG00000054983	GALC	-0.609218	4.28155	-1.31603	0.191415	0.438431
ENSG00000055044	NOP58	0.327715	4.19945	0.819362	0.414686	0.656473
ENSG00000055070	SZRD1	0.610762	4.14354	1.7606	0.0816106	0.277335
ENSG00000055130	CUL1	0.569817	3.99967	1.68781	0.0948173	0.299453
ENSG00000055147	FAM114A2	0.794257	2.01868	1.52158	0.131525	0.357804
ENSG00000055163	CYFIP2	0.200717	4.68286	0.577313	0.56513	0.767386
ENSG00000055208	TAB2	-0.0823597	5.4234	-0.426041	0.671067	0.833388
ENSG00000055211	GINM1	-1.19617	2.94522	-2.61274	0.0104825	0.0871537
ENSG00000055332	EIF2AK2	0.542252	5.39388	1.62147	0.108321	0.322847
ENSG00000055483	AC022966.1	0.451375	4.08481	1.13173	0.260671	0.514067
ENSG00000055609	KMT2C	-0.0441385	4.8599	-0.163883	0.870181	0.940026
ENSG00000055732	MCOLN3	-1.05692	0.0574394	-2.10091	0.0383685	0.182341
ENSG00000055917	PUM2	-0.401201	5.57259	-2.11668	0.0369716	0.178489
ENSG00000055950	MRPL43	-0.294555	2.45998	-0.54324	0.588271	0.781522
ENSG00000055955	ITIH4	2.35266	-0.522087	4.71513	8.51e-06	0.001169
ENSG00000056050	HPF1	-0.153895	1.14424	-0.22568	0.821948	0.916719
ENSG00000056097	ZFR	-0.544999	5.00451	-2.75628	0.00704223	0.0683663
ENSG00000056277	ZNF280C	-0.116445	-0.328215	-0.22952	0.818972	0.915244
ENSG00000056558	TRAF1	1.55372	0.133285	2.91456	0.00446701	0.052765
ENSG00000056586	RC3H2	-0.0869844	4.06165	-0.290813	0.771845	0.888748
ENSG00000056736	IL17RB	-0.48707	-1.47514	-1.14487	0.255216	0.508867
ENSG00000056972	TRAF3IP2	0.265522	3.3089	0.580375	0.563073	0.765738
ENSG00000056998	GYG2	-0.262452	-1.63306	-0.587982	0.557977	0.761229
ENSG00000057019	DCBLD2	-1.64603	3.07042	-4.01444	0.000120978	0.0067307
ENSG00000057149	SERPINB3	0.0868551	8.63424	0.328495	0.74328	0.874882
ENSG00000057252	SOAT1	-0.0773216	3.27563	-0.223004	0.824024	0.917596
ENSG00000057294	PKP2	-1.87436	2.8159	-4.85862	4.8e-06	0.000836711
ENSG00000057608	GDI2	0.23201	6.08547	1.19034	0.236958	0.490771
ENSG00000057657	PRDM1	1.26061	2.84677	2.28223	0.0247678	0.14243
ENSG00000057663	ATG5	-0.107228	4.10646	-0.300075	0.764793	0.885836
ENSG00000057704	TMCC3	0.0209414	1.13971	0.0312305	0.975153	0.987692
ENSG00000057757	PITHD1	0.371856	2.22936	0.732437	0.465753	0.696768
ENSG00000057935	MTA3	0.0495381	2.76209	0.094214	0.925143	0.968331
ENSG00000058056	USP13	-0.923912	0.33269	-1.68568	0.0952278	0.300227
ENSG00000058063	ATP11B	-1.00778	4.92054	-3.50441	0.00070732	0.0185066
ENSG00000058085	LAMC2	-0.241775	2.4708	-0.589208	0.557158	0.760651
ENSG00000058091	CDK14	0.175051	1.73683	0.304665	0.761306	0.884124
ENSG00000058262	SEC61A1	-0.302664	4.34551	-1.2592	0.211127	0.462219
ENSG00000058272	PPP1R12A	-0.246165	5.37884	-0.863587	0.390048	0.635678
ENSG00000058335	RASGRF1	-0.308176	-1.56054	-0.689408	0.492292	0.715861
ENSG00000058404	CAMK2B	-0.475599	1.9228	-0.696174	0.488065	0.713326
ENSG00000058453	CROCC	1.36028	3.92653	2.57735	0.0115368	0.0921837
ENSG00000058600	POLR3E	0.827169	3.32595	1.79085	0.0765879	0.268121
ENSG00000058668	ATP2B4	-0.921213	4.14356	-3.64018	0.000448662	0.0138733
ENSG00000058673	ZC3H11A	-0.0841054	5.13711	-0.327133	0.744306	0.875591
ENSG00000058729	RIOK2	-0.596957	1.98824	-1.09333	0.277087	0.531024
ENSG00000058799	YIPF1	0.211463	2.90721	0.45695	0.648778	0.819613
ENSG00000058804	NDC1	-0.325201	0.498586	-0.628296	0.531358	0.742641
ENSG00000058866	DGKG	-0.00113137	-1.29829	-0.00238422	0.998103	0.998985
ENSG00000059122	FLYWCH1	0.464592	2.35267	0.843495	0.401128	0.645502
ENSG00000059145	UNKL	1.26748	0.904684	2.12181	0.0365267	0.177256
ENSG00000059377	TBXAS1	-0.364415	1.61252	-0.574494	0.567028	0.768463
ENSG00000059378	PARP12	1.55613	4.62464	3.75483	0.000302869	0.0110286
ENSG00000059573	ALDH18A1	0.153496	2.29056	0.334659	0.73864	0.87226
ENSG00000059588	TARBP1	-0.56046	3.44091	-1.1755	0.24281	0.496559
ENSG00000059691	GATB	-0.214743	1.44464	-0.356075	0.722595	0.862882
ENSG00000059728	MXD1	0.223932	5.46906	0.495202	0.621632	0.803051
ENSG00000059758	CDK17	0.0203275	4.95216	0.0447882	0.964373	0.983964
ENSG00000059769	DNAJC25	-0.842291	-0.584766	-1.6432	0.103737	0.315233
ENSG00000059804	SLC2A3	-0.27409	4.4581	-0.439144	0.661581	0.827516
ENSG00000059915	PSD	0.73432	-0.193679	1.23822	0.218766	0.47074
ENSG00000060069	CTDP1	-0.221787	3.26272	-0.466845	0.641709	0.815654
ENSG00000060138	YBX3	0.103013	6.45366	0.406421	0.685372	0.841453
ENSG00000060140	STYK1	0.44575	1.78013	0.670633	0.504125	0.723092
ENSG00000060237	WNK1	0.0798522	5.97263	0.308449	0.758435	0.882227
ENSG00000060339	CCAR1	-0.126263	5.51993	-0.520187	0.604176	0.792262
ENSG00000060491	OGFR	1.09896	2.80805	2.60582	0.0106816	0.0882235
ENSG00000060558	GNA15	0.972377	1.46262	2.05079	0.0431163	0.194948
ENSG00000060642	PIGV	0.148974	0.686463	0.244947	0.80704	0.909124
ENSG00000060656	PTPRU	0.352519	2.82125	0.723665	0.471097	0.701048
ENSG00000060688	SNRNP40	0.429837	3.41736	1.00211	0.318902	0.572523
ENSG00000060749	QSER1	-0.47448	3.09159	-1.36883	0.174367	0.417867
ENSG00000060762	MPC1	-0.844844	4.56162	-1.77769	0.0787404	0.272154
ENSG00000060971	ACAA1	0.34653	3.82496	0.811138	0.419368	0.660733
ENSG00000060982	BCAT1	0.16466	2.21144	0.298271	0.766165	0.886543
ENSG00000061273	HDAC7	1.10217	4.45126	3.03369	0.00313554	0.043131
ENSG00000061656	SPAG4	1.36928	-0.884584	2.53995	0.0127541	0.0983429
ENSG00000061676	NCKAP1	-0.575948	4.84332	-2.08464	0.0398577	0.18606
ENSG00000061794	MRPS35	-0.828259	3.46078	-1.90329	0.0601117	0.23434
ENSG00000061918	GUCY1B1	-0.815406	-1.17008	-2.01765	0.0465251	0.203833
ENSG00000061936	SFSWAP	0.587985	2.93431	1.54053	0.126844	0.351676
ENSG00000061938	TNK2	2.12171	2.10127	3.92803	0.000164889	0.00798619
ENSG00000061987	MON2	-0.854869	4.91048	-2.48037	0.014933	0.108616
ENSG00000062038	CDH3	0.416101	2.22337	0.819251	0.414749	0.656492
ENSG00000062194	GPBP1	0.30287	6.03865	1.46166	0.147223	0.380582
ENSG00000062282	DGAT2	-1.14498	0.45491	-1.69616	0.0932188	0.297145
ENSG00000062370	ZNF112	-0.894945	-0.614714	-1.60955	0.110903	0.327117
ENSG00000062485	CS	0.015662	5.34648	0.0672499	0.946528	0.976745
ENSG00000062524	LTK	0.359437	-0.941206	0.804188	0.42335	0.663858
ENSG00000062582	MRPS24	-0.761919	3.56212	-1.6029	0.112365	0.329608
ENSG00000062598	ELMO2	0.0584288	3.44503	0.128662	0.897904	0.955546
ENSG00000062650	WAPL	-0.314237	3.9163	-1.23532	0.219841	0.472246
ENSG00000062716	VMP1	-0.359177	6.96507	-1.26429	0.209303	0.46011
ENSG00000062725	APPBP2	-0.870556	3.16713	-2.8051	0.00613114	0.0634004
ENSG00000062822	POLD1	1.23268	-0.0812171	2.34738	0.0210385	0.12984
ENSG00000063015	SEZ6	-0.189351	-1.46686	-0.390699	0.696918	0.849026
ENSG00000063046	EIF4B	-0.00794282	6.2698	-0.0352528	0.971954	0.986455
ENSG00000063127	SLC6A16	1.19172	-0.146333	1.90819	0.0594677	0.233166
ENSG00000063169	BICRA	1.25228	0.35091	2.69369	0.00839094	0.0761397
ENSG00000063176	SPHK2	0.945407	0.430844	1.93734	0.0557544	0.224739
ENSG00000063177	RPL18	1.17484	5.84481	3.20656	0.00184501	0.0314851
ENSG00000063180	CA11	1.15653	-1.79961	2.67551	0.00882456	0.0790181
ENSG00000063241	ISOC2	0.11264	1.73407	0.209441	0.834564	0.922812
ENSG00000063244	U2AF2	0.864342	4.40611	2.77983	0.00658827	0.0658211
ENSG00000063245	EPN1	0.486906	2.90243	1.28367	0.202462	0.45164
ENSG00000063322	MED29	-0.0442091	2.91205	-0.123597	0.901903	0.957333
ENSG00000063587	ZNF275	-0.620829	-0.142661	-1.39923	0.165087	0.406164
ENSG00000063601	MTMR1	-0.580496	3.83654	-1.79397	0.0760856	0.266972
ENSG00000063660	GPC1	1.01952	1.77427	1.81702	0.0724524	0.25978
ENSG00000063761	ADCK1	0.743556	-0.853797	1.83718	0.0693943	0.252998
ENSG00000063854	HAGH	0.329466	3.37132	0.94418	0.347537	0.599017
ENSG00000063978	RNF4	0.228786	4.39522	0.664138	0.508254	0.726231
ENSG00000064012	CASP8	0.384751	4.72714	1.15578	0.250748	0.504389
ENSG00000064042	LIMCH1	-0.0468494	2.3416	-0.0910371	0.92766	0.969035
ENSG00000064102	INTS13	0.774957	2.18584	1.37918	0.171164	0.413836
ENSG00000064115	TM7SF3	-0.197245	4.4882	-0.485859	0.628216	0.807435
ENSG00000064199	SPA17	-0.476442	4.49766	-0.888025	0.37683	0.624335
ENSG00000064201	TSPAN32	0.97067	-1.33193	1.98971	0.0495761	0.210723
ENSG00000064205	CCN5	-0.484661	-1.45437	-1.12532	0.263365	0.516651
ENSG00000064218	DMRT3	-0.365261	-0.203899	-0.703697	0.483389	0.710229
ENSG00000064225	ST3GAL6	-1.68799	4.42157	-3.35975	0.00113469	0.0238723
ENSG00000064270	ATP2C2	0.528171	4.31166	1.2269	0.222975	0.47546
ENSG00000064300	NGFR	0.302643	-2.04572	0.772902	0.441551	0.677136
ENSG00000064309	CDON	-1.22782	0.920127	-2.41144	0.0178648	0.118408
ENSG00000064313	TAF2	-0.21499	4.24853	-0.603281	0.547798	0.753732
ENSG00000064393	HIPK2	-0.195166	3.64334	-0.843372	0.401196	0.645502
ENSG00000064419	TNPO3	0.357652	3.13527	1.35422	0.178963	0.422605
ENSG00000064489	BORCS8-MEF2B	0.304086	-0.073118	0.468564	0.640484	0.814537
ENSG00000064490	RFXANK	1.98272	1.82201	3.15056	0.00219557	0.0350307
ENSG00000064545	TMEM161A	-0.282352	-1.17037	-0.546907	0.58576	0.780005
ENSG00000064547	LPAR2	0.55436	0.344975	0.879307	0.381513	0.62834
ENSG00000064601	CTSA	0.938781	3.96411	2.64925	0.00948695	0.0823559
ENSG00000064607	SUGP2	-0.191843	3.26112	-0.605665	0.54622	0.752599
ENSG00000064651	SLC12A2	-0.4506	4.00832	-1.4751	0.14358	0.376194
ENSG00000064652	SNX24	-0.192164	3.10148	-0.34923	0.72771	0.865664
ENSG00000064655	EYA2	0.137144	3.46077	0.320839	0.749056	0.877593
ENSG00000064666	CNN2	0.563776	5.21307	1.86043	0.0660011	0.245837
ENSG00000064687	ABCA7	1.86956	2.86972	4.16111	7.09e-05	0.0048873
ENSG00000064692	SNCAIP	-0.341576	1.75716	-0.642431	0.522182	0.735735
ENSG00000064703	DDX20	-0.437605	1.01438	-0.919298	0.360331	0.611524
ENSG00000064726	BTBD1	-0.62502	6.06001	-2.44819	0.0162434	0.112932
ENSG00000064763	FAR2	-0.475489	4.03535	-1.15342	0.251711	0.50538
ENSG00000064787	BCAS1	-0.170833	3.42809	-0.504294	0.615253	0.798464
ENSG00000064886	CHI3L2	0.143688	0.166039	0.222505	0.824411	0.917596
ENSG00000064932	SBNO2	1.38793	4.31686	3.4081	0.000970298	0.021804
ENSG00000064933	PMS1	-0.619759	2.64065	-1.20439	0.231512	0.484452
ENSG00000064961	HMG20B	1.48322	3.29652	3.25995	0.00156012	0.0288256
ENSG00000064989	CALCRL	-0.0247594	-0.372703	-0.0411123	0.967295	0.984587
ENSG00000064995	TAF11	-0.804656	1.82198	-1.75609	0.0823818	0.278702
ENSG00000064999	ANKS1A	0.18719	2.84945	0.6016	0.548912	0.754502
ENSG00000065000	AP3D1	0.164662	4.68177	0.801392	0.424959	0.664892
ENSG00000065029	ZNF76	1.48775	1.46194	3.03598	0.00311404	0.0429879
ENSG00000065054	SLC9A3R2	1.10803	3.7736	2.3875	0.018997	0.122706
ENSG00000065057	NTHL1	0.759791	-0.564112	1.25222	0.213648	0.465145
ENSG00000065060	UHRF1BP1	0.96853	0.84067	2.36419	0.0201607	0.127439
ENSG00000065135	GNAI3	-0.72924	3.18315	-2.18798	0.0311901	0.161787
ENSG00000065150	IPO5	-0.320245	4.74826	-1.20168	0.232556	0.485597
ENSG00000065154	OAT	-0.634296	5.15567	-1.97568	0.0511705	0.214155
ENSG00000065183	WDR3	-0.759222	1.26445	-1.58104	0.117283	0.337225
ENSG00000065243	PKN2	0.171872	4.51068	0.559724	0.57702	0.774918
ENSG00000065268	WDR18	0.382085	0.430084	0.69006	0.491884	0.715553
ENSG00000065308	TRAM2	-0.400399	-1.147	-1.10706	0.27114	0.525156
ENSG00000065320	NTN1	-0.146655	1.31816	-0.290261	0.772266	0.88892
ENSG00000065328	MCM10	0.907509	-1.52116	1.99299	0.0492085	0.209728
ENSG00000065357	DGKA	0.735655	5.13881	1.86146	0.0658546	0.245413
ENSG00000065361	ERBB3	0.146567	5.2945	0.454211	0.650741	0.821301
ENSG00000065413	ANKRD44	-0.121872	4.32795	-0.232767	0.816457	0.913919
ENSG00000065427	KARS1	0.544336	4.68535	2.24035	0.0274619	0.151491
ENSG00000065457	ADAT1	-0.21	3.61927	-0.434913	0.664638	0.82926
ENSG00000065485	PDIA5	0.582621	-0.125211	1.07155	0.286708	0.540695
ENSG00000065491	TBC1D22B	0.346694	0.15489	0.771823	0.442186	0.677546
ENSG00000065518	NDUFB4	0.0396023	5.16357	0.0994033	0.921033	0.966291
ENSG00000065526	SPEN	-0.282386	3.97475	-0.980133	0.329577	0.582549
ENSG00000065534	MYLK	-0.0928635	1.31242	-0.203612	0.839104	0.925085
ENSG00000065548	ZC3H15	-0.459601	5.01495	-1.79465	0.0759751	0.266727
ENSG00000065559	MAP2K4	-0.589169	4.81399	-1.7494	0.0835377	0.280568
ENSG00000065600	PACC1	0.47426	-0.417253	0.84476	0.400424	0.644867
ENSG00000065613	SLK	-0.799478	5.28365	-3.51917	0.000673529	0.0180323
ENSG00000065615	CYB5R4	-0.587396	3.54419	-1.65342	0.101635	0.312142
ENSG00000065618	COL17A1	-0.473815	-0.215219	-0.819002	0.41489	0.656646
ENSG00000065621	GSTO2	-0.660954	1.79175	-1.31491	0.191791	0.438965
ENSG00000065665	SEC61A2	-0.642568	1.07319	-0.988508	0.325482	0.578507
ENSG00000065675	PRKCQ	0.0904462	-1.30668	0.208075	0.835628	0.923176
ENSG00000065717	TLE2	0.697485	1.62052	1.12199	0.264771	0.518253
ENSG00000065802	ASB1	0.632981	0.781663	1.13165	0.260708	0.514067
ENSG00000065809	FAM107B	-0.101278	7.19237	-0.631365	0.529359	0.741305
ENSG00000065833	ME1	-0.456882	2.04892	-0.918636	0.360675	0.61163
ENSG00000065882	TBC1D1	0.530365	5.62089	2.351	0.0208462	0.129454
ENSG00000065883	CDK13	-0.671991	5.58983	-3.24064	0.00165807	0.0297778
ENSG00000065911	MTHFD2	0.510147	3.17323	0.974311	0.332443	0.584582
ENSG00000065923	SLC9A7	-0.0264833	0.49647	-0.0576189	0.954176	0.97964
ENSG00000065970	FOXJ2	0.311671	0.749429	0.696729	0.48772	0.713162
ENSG00000065978	YBX1	0.221361	6.0596	0.983963	0.3277	0.58026
ENSG00000065989	PDE4A	0.786225	0.515435	1.70042	0.0924109	0.296276
ENSG00000066027	PPP2R5A	-0.877681	3.9015	-2.48944	0.0145808	0.107231
ENSG00000066044	ELAVL1	0.591561	3.04038	1.44645	0.15143	0.38628
ENSG00000066084	DIP2B	0.0646149	2.95567	0.188368	0.851	0.932056
ENSG00000066117	SMARCD1	0.470835	3.5322	1.03715	0.302369	0.556864
ENSG00000066135	KDM4A	0.887973	3.10231	1.97001	0.051828	0.215616
ENSG00000066136	NFYC	0.051446	4.23963	0.124351	0.901307	0.957275
ENSG00000066185	ZMYND12	-0.493083	1.14	-0.734047	0.464777	0.696301
ENSG00000066230	SLC9A3	0.732735	2.17012	1.33888	0.183889	0.42961
ENSG00000066248	NGEF	0.0975975	-0.752711	0.175356	0.861183	0.935792
ENSG00000066279	ASPM	-0.478503	-1.4066	-1.09439	0.276626	0.530409
ENSG00000066294	CD84	0.830984	0.489261	1.56016	0.122137	0.344434
ENSG00000066322	ELOVL1	0.815888	2.67436	1.65263	0.101796	0.312318
ENSG00000066336	SPI1	1.75966	3.18056	2.80468	0.00613839	0.0634004
ENSG00000066379	ZNRD1	-0.368246	0.0183563	-0.659729	0.511067	0.728066
ENSG00000066382	MPPED2	-0.888932	-0.982609	-1.85406	0.0669171	0.24783
ENSG00000066405	CLDN18	-0.0905908	-1.38131	-0.225803	0.821853	0.916719
ENSG00000066422	ZBTB11	-1.29535	2.2143	-3.35334	0.00115837	0.0241788
ENSG00000066427	ATXN3	0.575428	3.95406	1.51204	0.133932	0.361092
ENSG00000066455	GOLGA5	-0.191134	3.42461	-0.64998	0.517316	0.73191
ENSG00000066468	FGFR2	-0.781434	3.08477	-1.76844	0.080283	0.275027
ENSG00000066557	LRRC40	-1.07998	0.855116	-2.01321	0.0469988	0.20465
ENSG00000066583	ISOC1	-0.378225	0.992579	-0.747991	0.456363	0.689404
ENSG00000066629	EML1	-1.0959	3.36814	-2.53873	0.0127955	0.0984879
ENSG00000066651	TRMT11	0.270692	2.38212	0.435996	0.663856	0.828569
ENSG00000066654	THUMPD1	0.0165741	3.45642	0.0503241	0.959973	0.981953
ENSG00000066697	MSANTD3	-1.05463	0.954532	-1.87536	0.0638978	0.241367
ENSG00000066739	ATG2B	-0.722879	2.68007	-1.68778	0.094822	0.299453
ENSG00000066777	ARFGEF1	-0.68525	4.6573	-3.17731	0.00202104	0.0333721
ENSG00000066813	ACSM2B	-2.90705	1.92044	-5.05686	2.15e-06	0.000493413
ENSG00000066827	ZFAT	1.11719	1.32581	2.12777	0.036015	0.175955
ENSG00000066855	MTFR1	-1.75682	3.19313	-3.53072	0.000648162	0.0176051
ENSG00000066923	STAG3	0.340475	4.83791	0.762759	0.447548	0.681661
ENSG00000066926	FECH	-0.00484352	2.75147	-0.0101316	0.991938	0.996399
ENSG00000066933	MYO9A	-1.09099	3.85374	-3.0851	0.00268361	0.0394916
ENSG00000067048	DDX3Y	1.23509	1.70326	1.26655	0.208495	0.459007
ENSG00000067057	PFKP	0.275839	3.89013	0.756367	0.451351	0.685013
ENSG00000067064	IDI1	-0.785937	5.07122	-2.42391	0.0172992	0.116674
ENSG00000067066	SP100	1.1343	6.77033	4.60138	1.33e-05	0.0015447
ENSG00000067082	KLF6	0.0195235	5.9283	0.0654014	0.947996	0.977553
ENSG00000067113	PLPP1	-1.68854	1.72694	-2.98814	0.00359392	0.0464078
ENSG00000067141	NEO1	-0.520537	2.60813	-1.06528	0.289522	0.542981
ENSG00000067167	TRAM1	-0.455114	5.97573	-1.6684	0.0986169	0.306521
ENSG00000067177	PHKA1	0.111388	-0.0388276	0.239231	0.811456	0.911706
ENSG00000067182	TNFRSF1A	0.175767	5.16026	0.473821	0.636744	0.812613
ENSG00000067191	CACNB1	0.433037	1.06705	0.778364	0.438341	0.674587
ENSG00000067208	EVI5	-0.555933	3.68067	-1.44723	0.151213	0.386085
ENSG00000067221	STOML1	1.89141	-0.152306	3.6588	0.000421145	0.0134103
ENSG00000067225	PKM	0.498681	7.07839	2.80188	0.00618775	0.0636904
ENSG00000067248	DHX29	-0.509663	2.88339	-1.19954	0.233381	0.486569
ENSG00000067334	DNTTIP2	-0.366914	5.14233	-1.19714	0.23431	0.487535
ENSG00000067365	METTL22	-0.856666	1.61997	-1.40814	0.162441	0.4017
ENSG00000067369	TP53BP1	0.610192	4.03136	1.6162	0.109457	0.324832
ENSG00000067445	TRO	-0.2743	-0.937418	-0.534207	0.59448	0.785621
ENSG00000067533	RRP15	-0.662875	0.124988	-1.39369	0.166749	0.407925
ENSG00000067560	RHOA	-0.165316	7.33003	-1.0441	0.299158	0.553514
ENSG00000067596	DHX8	-0.304498	3.86834	-0.84748	0.398915	0.643821
ENSG00000067606	PRKCZ	1.13499	2.62485	2.31844	0.0226286	0.135139
ENSG00000067646	ZFY	-0.834009	-0.728213	-1.25402	0.212993	0.464538
ENSG00000067704	IARS2	-0.11639	3.40879	-0.298115	0.766284	0.886543
ENSG00000067798	NAV3	-0.0803393	3.10108	-0.129915	0.896916	0.954915
ENSG00000067829	IDH3G	0.509182	3.42436	1.12503	0.263488	0.516688
ENSG00000067836	ROGDI	0.275967	2.09943	0.471319	0.638523	0.813546
ENSG00000067900	ROCK1	-0.311967	5.19268	-1.21107	0.228954	0.482066
ENSG00000067955	CBFB	-0.239837	4.78821	-0.960686	0.339214	0.590727
ENSG00000067992	PDK3	-0.56534	1.7803	-1.33224	0.186053	0.432197
ENSG00000068001	HYAL2	-0.52348	-0.679313	-1.05982	0.291987	0.545955
ENSG00000068024	HDAC4	0.267419	2.97964	0.469712	0.639666	0.814397
ENSG00000068028	RASSF1	1.07115	-0.240544	2.2026	0.0301072	0.158824
ENSG00000068078	FGFR3	0.444499	1.98129	0.656488	0.51314	0.729467
ENSG00000068079	IFI35	2.3595	3.46248	3.68685	0.000382689	0.0127274
ENSG00000068097	HEATR6	-0.2636	1.51333	-0.512546	0.609491	0.79491
ENSG00000068120	COASY	1.05631	2.81337	2.30772	0.0232443	0.137282
ENSG00000068137	PLEKHH3	1.04721	0.11735	2.01706	0.0465873	0.203986
ENSG00000068305	MEF2A	-0.688564	4.87205	-2.19311	0.0308064	0.16065
ENSG00000068308	OTUD5	0.70956	3.00042	1.78119	0.0781628	0.270846
ENSG00000068323	TFE3	0.343362	1.96428	0.767413	0.44479	0.679813
ENSG00000068354	TBC1D25	0.679732	0.350426	1.37508	0.172429	0.415191
ENSG00000068366	ACSL4	0.507546	3.75529	1.30992	0.193466	0.441199
ENSG00000068383	INPP5A	0.746275	1.67438	1.30311	0.19577	0.444259
ENSG00000068394	GPKOW	1.67739	-0.18312	3.8822	0.00019399	0.00877117
ENSG00000068400	GRIPAP1	1.08264	3.85308	2.54576	0.0125576	0.0974274
ENSG00000068438	FTSJ1	0.434876	2.53985	0.906082	0.367247	0.617361
ENSG00000068489	PRR11	-0.72069	0.0895357	-1.44825	0.150929	0.385791
ENSG00000068615	REEP1	0.0621938	-0.851867	0.101215	0.919599	0.965669
ENSG00000068650	ATP11A	-0.51194	3.41673	-1.04775	0.297482	0.551755
ENSG00000068654	POLR1A	1.04461	1.84186	2.39899	0.0184459	0.120709
ENSG00000068697	LAPTM4A	-0.238684	5.74784	-1.04895	0.296932	0.551146
ENSG00000068724	TTC7A	0.59512	2.87438	1.58765	0.115778	0.334966
ENSG00000068745	IP6K2	0.469027	4.45222	1.27567	0.205265	0.454809
ENSG00000068784	SRBD1	-0.500651	2.92419	-1.05548	0.293955	0.547453
ENSG00000068796	KIF2A	-0.368126	4.97533	-1.45345	0.149484	0.384195
ENSG00000068831	RASGRP2	1.80336	-0.213883	2.76767	0.00681931	0.0672761
ENSG00000068878	PSME4	-0.583495	5.2378	-2.38784	0.0189806	0.122705
ENSG00000068885	IFT80	-0.652237	5.60145	-1.89106	0.0617448	0.237185
ENSG00000068903	SIRT2	-0.309631	3.80108	-1.04593	0.298319	0.552611
ENSG00000068912	ERLEC1	-0.590289	3.74723	-1.34671	0.181363	0.426102
ENSG00000068971	PPP2R5B	1.2597	0.117356	2.43496	0.0168114	0.115202
ENSG00000068976	PYGM	0.623875	-1.04002	1.16567	0.246744	0.499594
ENSG00000069011	PITX1	-0.407679	3.39722	-0.952685	0.343232	0.594353
ENSG00000069020	MAST4	-0.177173	3.82731	-0.44648	0.656294	0.824693
ENSG00000069122	ADGRF5	-0.374592	-1.2701	-0.764973	0.446235	0.680715
ENSG00000069188	SDK2	-0.498328	-1.23636	-0.864006	0.389819	0.635447
ENSG00000069248	NUP133	-0.9932	2.8045	-2.47616	0.0150985	0.108927
ENSG00000069275	NUCKS1	0.0427716	4.99271	0.153896	0.878027	0.944683
ENSG00000069329	VPS35	-0.610907	5.03656	-2.59353	0.0110434	0.090071
ENSG00000069345	DNAJA2	-0.353778	4.8282	-1.83093	0.0703302	0.255291
ENSG00000069399	BCL3	1.0822	4.41454	2.04715	0.0434791	0.195467
ENSG00000069424	KCNAB2	0.958529	2.84127	1.76424	0.0809918	0.275984
ENSG00000069431	ABCC9	-0.880604	0.0463827	-2.04855	0.0433395	0.195408
ENSG00000069493	CLEC2D	-0.0401319	4.16536	-0.0820329	0.934798	0.97181
ENSG00000069509	FUNDC1	1.15958	0.94327	1.83528	0.0696771	0.253782
ENSG00000069535	MAOB	-0.976869	-0.287199	-1.69904	0.0926713	0.296477
ENSG00000069667	RORA	0.178707	4.25262	0.51664	0.60664	0.793828
ENSG00000069696	DRD4	0.485139	-1.48324	0.91435	0.36291	0.613915
ENSG00000069702	TGFBR3	-0.966992	-0.0745695	-1.86873	0.0648252	0.243334
ENSG00000069764	PLA2G10	0.659502	1.64338	1.17436	0.243265	0.496637
ENSG00000069812	HES2	0.305524	-1.07824	0.661766	0.509766	0.727416
ENSG00000069849	ATP1B3	-0.47395	4.75746	-1.11425	0.268057	0.52148
ENSG00000069869	NEDD4	-0.00636887	6.29331	-0.0186585	0.985154	0.992983
ENSG00000069943	PIGB	-1.0956	3.52392	-2.11701	0.0369422	0.178463
ENSG00000069956	MAPK6	-0.793976	4.48665	-2.87549	0.00500616	0.0560795
ENSG00000069966	GNB5	-0.198174	2.05791	-0.420909	0.674798	0.835165
ENSG00000069974	RAB27A	-0.135317	4.29389	-0.358824	0.720545	0.862073
ENSG00000069998	HDHD5	0.00362614	-0.0687321	0.00658621	0.994759	0.99733
ENSG00000070010	UFD1	0.261264	3.97077	0.815677	0.41678	0.658379
ENSG00000070018	LRP6	0.191333	1.43857	0.391629	0.696233	0.848703
ENSG00000070019	GUCY2C	-1.20169	-1.06635	-2.77289	0.00671921	0.0665958
ENSG00000070047	PHRF1	1.56882	1.66698	3.86275	0.000207769	0.00906553
ENSG00000070061	ELP1	-0.264024	2.99557	-0.73363	0.46503	0.696301
ENSG00000070081	NUCB2	-0.789522	7.22292	-2.7988	0.00624234	0.063857
ENSG00000070087	PFN2	-0.808731	6.13375	-3.46505	0.000805439	0.0196643
ENSG00000070159	PTPN3	-0.787567	4.30667	-2.57309	0.0116699	0.0928501
ENSG00000070182	SPTB	0.104384	-1.97626	0.239101	0.811556	0.911706
ENSG00000070190	DAPP1	0.14157	4.81493	0.45313	0.651516	0.821725
ENSG00000070214	SLC44A1	-0.912166	2.01141	-2.04257	0.0439409	0.196744
ENSG00000070269	TMEM260	-0.376611	3.40993	-0.82941	0.409008	0.652372
ENSG00000070366	SMG6	1.23799	3.37067	2.96918	0.00380244	0.0478616
ENSG00000070367	EXOC5	-0.379015	4.88317	-1.19	0.237091	0.490911
ENSG00000070371	CLTCL1	-0.08565	-0.881022	-0.173533	0.862612	0.936582
ENSG00000070404	FSTL3	-0.15245	-2.08365	-0.357099	0.721831	0.86257
ENSG00000070413	DGCR2	0.554005	1.74212	1.2135	0.228029	0.481389
ENSG00000070423	RNF126	1.08354	1.55644	2.08861	0.0394892	0.185265
ENSG00000070444	MNT	0.831556	2.03765	1.54944	0.124689	0.348673
ENSG00000070476	ZXDC	0.0619771	1.95361	0.169187	0.866019	0.937847
ENSG00000070495	JMJD6	0.28581	1.81988	0.524561	0.601143	0.790294
ENSG00000070501	POLB	-0.112309	4.77756	-0.288796	0.773384	0.889727
ENSG00000070526	ST6GALNAC1	0.155604	4.67233	0.402232	0.688441	0.843329
ENSG00000070540	WIPI1	-0.269045	4.23602	-0.709828	0.479596	0.707714
ENSG00000070601	FRMPD1	-0.468959	-1.94705	-0.991961	0.323804	0.577117
ENSG00000070610	GBA2	0.85035	2.95947	1.99751	0.0487075	0.208444
ENSG00000070614	NDST1	0.268819	1.91097	0.608063	0.544636	0.751869
ENSG00000070669	ASNS	0.216426	2.15045	0.366967	0.714481	0.858732
ENSG00000070718	AP3M2	-0.211591	2.78097	-0.400639	0.68961	0.84416
ENSG00000070729	CNGB1	0.0202867	-1.48445	0.0434793	0.965413	0.984064
ENSG00000070731	ST6GALNAC2	-1.1595	2.87858	-2.40449	0.0181873	0.119592
ENSG00000070756	PABPC1	-0.339046	8.56742	-2.12641	0.0361315	0.176311
ENSG00000070759	TESK2	-0.315538	-0.0301713	-0.615449	0.539769	0.749086
ENSG00000070761	CFAP20	-0.856704	3.00951	-1.60459	0.111992	0.329161
ENSG00000070770	CSNK2A2	0.0988582	3.67523	0.312667	0.755237	0.880975
ENSG00000070778	PTPN21	-0.113718	1.83664	-0.218209	0.827747	0.920088
ENSG00000070785	EIF2B3	0.880982	2.64935	2.11141	0.0374332	0.179387
ENSG00000070814	TCOF1	1.22976	2.23077	2.38361	0.0191872	0.123561
ENSG00000070831	CDC42	0.0615327	6.89802	0.389776	0.697598	0.849146
ENSG00000070882	OSBPL3	-0.534712	4.51503	-1.25987	0.210885	0.461824
ENSG00000070950	RAD18	-0.42391	0.984405	-0.724439	0.470624	0.700693
ENSG00000070961	ATP2B1	-0.307484	4.77967	-0.764558	0.446481	0.680715
ENSG00000071051	NCK2	-0.16326	3.21738	-0.438492	0.662052	0.827577
ENSG00000071054	MAP4K4	-0.11937	4.47043	-0.376701	0.707258	0.854649
ENSG00000071073	MGAT4A	0.809291	3.51561	1.7277	0.0873795	0.287445
ENSG00000071082	RPL31	0.0849064	8.83944	0.401558	0.688936	0.843611
ENSG00000071127	WDR1	0.187981	6.24138	0.733974	0.464821	0.696301
ENSG00000071189	SNX13	-0.915444	4.89258	-3.48951	0.000743062	0.0189772
ENSG00000071205	ARHGAP10	-0.290009	0.598664	-0.505115	0.614679	0.798203
ENSG00000071242	RPS6KA2	-0.291683	2.71034	-0.602908	0.548045	0.75375
ENSG00000071243	ING3	0.204131	2.47009	0.412906	0.680631	0.838512
ENSG00000071246	VASH1	0.679764	0.389274	1.2666	0.20848	0.459007
ENSG00000071282	LMCD1	-1.34191	0.177979	-2.40781	0.0180323	0.119254
ENSG00000071462	BUD23	0.0831601	4.06577	0.208914	0.834974	0.922817
ENSG00000071537	SEL1L	0.240504	3.93168	0.703721	0.483374	0.710229
ENSG00000071539	TRIP13	-1.35454	0.766541	-2.36246	0.0202492	0.127439
ENSG00000071553	ATP6AP1	-0.0118707	4.00745	-0.0373179	0.970312	0.985976
ENSG00000071564	TCF3	0.974402	3.09249	2.00864	0.0474901	0.20586
ENSG00000071575	TRIB2	1.13198	3.73887	2.87098	0.00507218	0.0566072
ENSG00000071626	DAZAP1	1.11997	3.79256	3.91229	0.000174377	0.00818095
ENSG00000071655	MBD3	1.10687	2.27546	2.34538	0.0211451	0.130229
ENSG00000071794	HLTF	-1.47987	2.42536	-3.37513	0.00107977	0.0232516
ENSG00000071859	FAM50A	2.38439	1.886	4.83127	5.36e-06	0.000879268
ENSG00000071889	FAM3A	-0.63754	1.9442	-1.29429	0.198786	0.447642
ENSG00000071894	CPSF1	1.58872	2.4668	3.1213	0.00240247	0.0369531
ENSG00000071967	CYBRD1	-1.21147	0.803742	-2.20348	0.0300435	0.158656
ENSG00000071991	CDH19	-0.462319	-1.67233	-0.931596	0.35397	0.606117
ENSG00000071994	PDCD2	-1.01768	3.52846	-2.32479	0.0222707	0.133964
ENSG00000072042	RDH11	0.196942	2.3223	0.396482	0.692663	0.846098
ENSG00000072062	PRKACA	1.06699	2.82704	2.60949	0.0105756	0.0875408
ENSG00000072071	ADGRL1	0.673681	0.311073	1.3616	0.17663	0.420194
ENSG00000072080	SPP2	0.348033	1.32347	0.469571	0.639767	0.814439
ENSG00000072110	ACTN1	0.418272	4.58973	1.1564	0.250497	0.504228
ENSG00000072121	ZFYVE26	0.749812	3.01845	2.01581	0.0467207	0.204305
ENSG00000072133	RPS6KA6	-1.70635	0.676011	-3.59011	0.000531364	0.0155017
ENSG00000072134	EPN2	-0.32356	3.64555	-0.657126	0.512732	0.729216
ENSG00000072135	PTPN18	0.225775	3.47883	0.511476	0.610236	0.795401
ENSG00000072195	SPEG	-0.408155	-1.91781	-0.950585	0.344292	0.595374
ENSG00000072201	LNX1	-0.0160682	2.82831	-0.0346545	0.97243	0.986735
ENSG00000072210	ALDH3A2	-0.679515	5.76185	-2.39817	0.0184847	0.120857
ENSG00000072274	TFRC	0.262195	5.39581	0.744205	0.458639	0.690611
ENSG00000072310	SREBF1	0.949891	4.16493	2.05124	0.0430712	0.194862
ENSG00000072364	AFF4	-0.133337	5.26165	-0.562919	0.574852	0.774229
ENSG00000072401	UBE2D1	-0.506848	4.30388	-1.34555	0.181737	0.426638
ENSG00000072415	MPP5	-1.61477	3.32812	-4.43762	2.51e-05	0.00240578
ENSG00000072422	RHOBTB1	-0.508019	0.82997	-0.935888	0.351767	0.604149
ENSG00000072501	SMC1A	0.23637	2.93423	0.658397	0.511918	0.728544
ENSG00000072506	HSD17B10	-0.413255	1.73507	-0.694465	0.489131	0.71383
ENSG00000072518	MARK2	0.343472	4.258	1.15234	0.252152	0.505793
ENSG00000072571	HMMR	0.31746	-1.37807	0.659625	0.511133	0.728066
ENSG00000072609	CHFR	1.23501	4.21321	3.5597	0.000588431	0.0165535
ENSG00000072682	P4HA2	-0.242663	2.9938	-0.533655	0.59486	0.785969
ENSG00000072694	FCGR2B	1.0418	0.72135	1.55204	0.124067	0.347584
ENSG00000072736	NFATC3	0.108148	3.96513	0.403124	0.687787	0.843089
ENSG00000072756	TRNT1	-0.0500381	3.0601	-0.0960553	0.923684	0.96751
ENSG00000072778	ACADVL	0.916638	5.65089	2.598	0.0109106	0.0895215
ENSG00000072786	STK10	0.346014	4.05411	0.746323	0.457365	0.689827
ENSG00000072803	FBXW11	-0.290607	4.69702	-0.762979	0.447417	0.681532
ENSG00000072818	ACAP1	2.55905	2.26863	4.35757	3.4e-05	0.00295806
ENSG00000072832	CRMP1	-0.579471	-1.44692	-1.32793	0.187468	0.433639
ENSG00000072840	EVC	-0.0788918	-1.18256	-0.187959	0.851321	0.932056
ENSG00000072849	DERL2	-0.0343789	3.14841	-0.0771269	0.938689	0.974102
ENSG00000072858	SIDT1	0.231572	3.51676	0.39953	0.690423	0.844778
ENSG00000072864	NDE1	1.30353	3.31705	2.74028	0.00736684	0.0703963
ENSG00000072952	MRVI1	-0.434609	-0.0172531	-0.73889	0.461844	0.693763
ENSG00000072954	TMEM38A	-0.243074	-1.25332	-0.51176	0.610038	0.795212
ENSG00000072958	AP1M1	0.697605	2.6391	1.52962	0.129524	0.355252
ENSG00000073008	PVR	-0.457998	-0.802141	-0.951323	0.343919	0.595087
ENSG00000073050	XRCC1	1.44757	1.14271	2.84385	0.00548608	0.0592366
ENSG00000073060	SCARB1	0.736343	0.728141	1.42901	0.156369	0.39356
ENSG00000073067	CYP2W1	0.713764	-1.76693	1.71798	0.0891448	0.290956
ENSG00000073111	MCM2	1.32919	0.171299	2.73739	0.00742692	0.0707069
ENSG00000073150	PANX2	0.122241	-0.519911	0.278214	0.781469	0.893397
ENSG00000073169	SELENOO	1.55795	0.558899	3.5829	0.000544402	0.0157592
ENSG00000073282	TP63	-0.370888	2.10447	-0.651298	0.516469	0.731528
ENSG00000073331	ALPK1	-0.166008	4.95864	-0.546239	0.586217	0.780066
ENSG00000073350	LLGL2	1.05653	4.37704	3.0725	0.00278838	0.0403977
ENSG00000073417	PDE8A	-0.679373	4.01412	-1.89543	0.061157	0.23634
ENSG00000073464	CLCN4	-0.908897	-1.73424	-2.47929	0.0149752	0.108738
ENSG00000073536	NLE1	-0.661942	-0.863191	-1.47115	0.144643	0.377908
ENSG00000073578	SDHA	0.277839	5.79902	0.915595	0.36226	0.613232
ENSG00000073584	SMARCE1	-0.222783	4.96052	-0.883086	0.379479	0.626921
ENSG00000073605	GSDMB	1.85066	2.84061	3.22774	0.00172666	0.0303657
ENSG00000073614	KDM5A	-0.0747209	4.79965	-0.271983	0.786241	0.895537
ENSG00000073711	PPP2R3A	-1.44969	1.10971	-2.88885	0.00481543	0.0550977
ENSG00000073712	FERMT2	-1.2752	0.767515	-2.00742	0.0476226	0.206187
ENSG00000073734	ABCB11	-1.28028	0.994456	-2.21154	0.0294617	0.15689
ENSG00000073737	DHRS9	-0.0830321	6.30682	-0.384709	0.701336	0.850767
ENSG00000073756	PTGS2	-1.31692	4.86628	-2.46152	0.0156883	0.110917
ENSG00000073792	IGF2BP2	-0.079929	4.38237	-0.201105	0.841058	0.926079
ENSG00000073803	MAP3K13	0.0637472	5.15675	0.291637	0.771217	0.888666
ENSG00000073849	ST6GAL1	0.314662	5.45311	1.20746	0.230334	0.483573
ENSG00000073861	TBX21	1.18888	-1.75733	2.85017	0.00538687	0.0588581
ENSG00000073910	FRY	-0.932298	2.14423	-1.90385	0.0600378	0.234113
ENSG00000073921	PICALM	-0.925217	7.1988	-4.07311	9.78e-05	0.0059691
ENSG00000073969	NSF	0.223562	4.90218	0.731656	0.466228	0.69706
ENSG00000074047	GLI2	-0.0159784	-0.839361	-0.0289867	0.976938	0.988897
ENSG00000074054	CLASP1	0.149677	4.11269	0.438783	0.661842	0.827516
ENSG00000074071	MRPS34	0.77587	1.10546	1.28812	0.200916	0.449799
ENSG00000074181	NOTCH3	-0.156831	0.513474	-0.294246	0.769229	0.888019
ENSG00000074201	CLNS1A	-0.300978	5.73274	-1.02328	0.308844	0.563052
ENSG00000074211	PPP2R2C	-0.834574	-1.96621	-2.15867	0.0334641	0.168571
ENSG00000074219	TEAD2	0.283352	-2.0836	0.732637	0.465632	0.696768
ENSG00000074266	EED	-0.517729	2.75949	-1.03672	0.302569	0.556912
ENSG00000074276	CDHR2	-0.198823	-1.47932	-0.438936	0.661731	0.827516
ENSG00000074319	TSG101	-0.511406	5.05073	-1.67134	0.0980345	0.3056
ENSG00000074356	NCBP3	0.174009	3.09927	0.45849	0.647675	0.819228
ENSG00000074370	ATP2A3	1.01888	3.58254	2.24486	0.0271602	0.150907
ENSG00000074410	CA12	-0.457836	1.48733	-0.824374	0.411848	0.655305
ENSG00000074416	MGLL	-0.252089	4.12002	-0.798425	0.426669	0.6662
ENSG00000074527	NTN4	-0.802335	3.28513	-1.70296	0.0919339	0.295426
ENSG00000074582	BCS1L	0.918211	0.978841	1.34847	0.180798	0.425445
ENSG00000074590	NUAK1	0.319008	0.0131072	0.534736	0.594115	0.785497
ENSG00000074603	DPP8	-0.173879	4.01585	-0.519616	0.604572	0.792624
ENSG00000074621	SLC24A1	0.234395	3.49844	0.591457	0.555657	0.759484
ENSG00000074657	ZNF532	1.18634	3.89844	3.15003	0.00219919	0.0350511
ENSG00000074660	SCARF1	0.495965	-0.157318	0.764037	0.446789	0.680991
ENSG00000074695	LMAN1	0.00967609	4.55941	0.027237	0.978329	0.989209
ENSG00000074696	HACD3	-0.321438	4.11297	-1.1606	0.248793	0.50181
ENSG00000074706	IPCEF1	0.0686212	1.014	0.108585	0.913767	0.96305
ENSG00000074755	ZZEF1	0.0283445	4.08851	0.0948531	0.924637	0.96809
ENSG00000074800	ENO1	0.359988	5.95113	1.28055	0.203552	0.452989
ENSG00000074842	MYDGF	-0.189076	0.901702	-0.321416	0.74862	0.877495
ENSG00000074855	ANO8	0.970323	-1.05717	2.31403	0.0228803	0.135997
ENSG00000074935	TUBE1	-1.09565	3.67515	-2.63334	0.00990979	0.0839807
ENSG00000074964	ARHGEF10L	1.15647	1.45362	2.18508	0.0314095	0.162206
ENSG00000074966	TXK	0.199774	-0.330469	0.327058	0.744363	0.875591
ENSG00000075073	TACR2	-0.0952886	-0.542733	-0.191864	0.848269	0.930716
ENSG00000075089	ACTR6	-0.816379	3.43585	-1.55421	0.123548	0.346852
ENSG00000075131	TIPIN	0.116643	0.16489	0.233184	0.816134	0.913762
ENSG00000075142	SRI	-0.405369	6.12	-1.73585	0.0859201	0.285126
ENSG00000075151	EIF4G3	-0.681145	5.16602	-2.92878	0.00428428	0.0515423
ENSG00000075188	NUP37	-0.548999	2.12642	-0.928483	0.355573	0.607617
ENSG00000075213	SEMA3A	-0.704712	1.52551	-1.35363	0.179151	0.422965
ENSG00000075218	GTSE1	0.317458	-1.0601	0.643452	0.521522	0.735221
ENSG00000075223	SEMA3C	-0.999835	4.96277	-3.30088	0.0013702	0.0266731
ENSG00000075234	TTC38	0.494284	1.91153	0.859247	0.392426	0.637404
ENSG00000075239	ACAT1	-1.14304	4.16358	-2.57431	0.0116317	0.0927438
ENSG00000075240	GRAMD4	0.73399	2.1187	1.47868	0.142624	0.374626
ENSG00000075275	CELSR1	0.136683	3.23588	0.410943	0.682065	0.839482
ENSG00000075292	ZNF638	-0.237264	6.41072	-0.861898	0.390972	0.635987
ENSG00000075303	SLC25A40	-1.13188	3.49904	-2.75224	0.00712296	0.068909
ENSG00000075336	TIMM21	-0.50206	0.928828	-0.754837	0.452264	0.685635
ENSG00000075340	ADD2	-0.497186	-0.601081	-0.935522	0.351955	0.604194
ENSG00000075391	RASAL2	-0.832781	3.22313	-2.05311	0.0428856	0.194228
ENSG00000075399	VPS9D1	1.32673	1.89738	2.18292	0.0315726	0.1626
ENSG00000075407	ZNF37A	-0.533664	3.14381	-1.462	0.147129	0.380582
ENSG00000075413	MARK3	-0.174994	5.64279	-0.65016	0.5172	0.731886
ENSG00000075415	SLC25A3	-0.0571439	6.27681	-0.246343	0.805963	0.908696
ENSG00000075420	FNDC3B	0.0104435	5.975	0.0387345	0.969186	0.985516
ENSG00000075426	FOSL2	0.0602619	4.1986	0.174939	0.86151	0.935907
ENSG00000075539	FRYL	0.153741	5.45566	0.523292	0.602022	0.79099
ENSG00000075568	TMEM131	-0.032894	5.04242	-0.110087	0.912579	0.962552
ENSG00000075618	FSCN1	1.31326	-0.215808	2.57707	0.0115455	0.0922042
ENSG00000075624	ACTB	0.270492	10.2818	1.29704	0.197845	0.446463
ENSG00000075643	MOCOS	-0.344721	0.377085	-0.768943	0.443886	0.679193
ENSG00000075651	PLD1	-1.01995	4.61466	-2.94625	0.00406942	0.0495549
ENSG00000075673	ATP12A	0.0119939	2.20737	0.0232106	0.981532	0.991001
ENSG00000075702	WDR62	0.214014	-1.46455	0.512687	0.609392	0.79491
ENSG00000075711	DLG1	0.00785966	5.87857	0.0316527	0.974817	0.987661
ENSG00000075785	RAB7A	-0.184693	6.43222	-1.05104	0.295978	0.550056
ENSG00000075790	BCAP29	0.219212	4.05311	0.422549	0.673605	0.834974
ENSG00000075826	SEC31B	1.39109	-0.754956	3.24038	0.00165941	0.0297778
ENSG00000075856	SART3	-0.0415805	3.86147	-0.119803	0.904899	0.958749
ENSG00000075884	ARHGAP15	-0.0188791	4.3408	-0.0305795	0.975671	0.987949
ENSG00000075886	TUBA3D	0.259052	-1.59881	0.515292	0.607578	0.794277
ENSG00000075914	EXOSC7	0.329115	1.7525	0.555248	0.580065	0.776744
ENSG00000075945	KIFAP3	-0.800658	2.89222	-1.87806	0.0635223	0.240799
ENSG00000075975	MKRN2	-0.319916	2.18034	-0.798844	0.426427	0.66603
ENSG00000076003	MCM6	0.780921	0.304587	1.54667	0.125356	0.349619
ENSG00000076043	REXO2	-0.82356	4.51528	-1.91343	0.058785	0.231926
ENSG00000076053	RBM7	-0.0884911	3.93076	-0.200672	0.841395	0.926211
ENSG00000076067	RBMS2	0.767258	4.01182	1.63826	0.104764	0.317324
ENSG00000076108	BAZ2A	0.980882	5.0528	3.65742	0.00042313	0.0134165
ENSG00000076201	PTPN23	0.932405	1.66452	2.00543	0.0478388	0.206517
ENSG00000076242	MLH1	-0.35088	4.16709	-1.02674	0.307219	0.561808
ENSG00000076248	UNG	-0.315146	0.0437452	-0.606882	0.545416	0.752045
ENSG00000076258	FMO4	-1.37637	0.8772	-2.23386	0.0279021	0.152793
ENSG00000076321	KLHL20	0.647209	1.97284	1.32483	0.188492	0.434531
ENSG00000076351	SLC46A1	-0.00418438	0.462096	-0.00791911	0.993699	0.997297
ENSG00000076356	PLXNA2	0.464104	1.6733	0.92586	0.356928	0.608616
ENSG00000076382	SPAG5	0.428642	0.991388	0.686093	0.49437	0.717536
ENSG00000076513	ANKRD13A	0.486799	5.13156	1.9555	0.0535417	0.219776
ENSG00000076554	TPD52	0.104478	5.4874	0.435909	0.663918	0.828569
ENSG00000076555	ACACB	-0.153955	2.71814	-0.36707	0.714405	0.858732
ENSG00000076604	TRAF4	0.223879	4.66812	0.500664	0.617797	0.800446
ENSG00000076641	PAG1	-0.212182	2.14545	-0.311306	0.756268	0.881257
ENSG00000076650	GPATCH1	0.415353	0.593515	0.86058	0.391694	0.636631
ENSG00000076662	ICAM3	-0.0665811	1.42909	-0.103166	0.918055	0.965199
ENSG00000076685	NT5C2	-0.423825	6.86216	-1.69352	0.0937217	0.298053
ENSG00000076706	MCAM	-0.0416609	-0.993437	-0.0837704	0.93342	0.971247
ENSG00000076716	GPC4	-0.459543	-0.110253	-1.00438	0.317816	0.571934
ENSG00000076770	MBNL3	-0.359946	2.5386	-0.759198	0.449664	0.683676
ENSG00000076826	CAMSAP3	-0.0244277	-0.162731	-0.0503856	0.959924	0.981953
ENSG00000076864	RAP1GAP	-0.206525	0.0919389	-0.430123	0.668106	0.831369
ENSG00000076924	XAB2	1.35743	0.941658	3.03955	0.00308072	0.0428251
ENSG00000076928	ARHGEF1	1.59036	3.79033	3.84207	0.000223443	0.0093409
ENSG00000076944	STXBP2	0.280461	4.98868	0.796623	0.42771	0.667204
ENSG00000076984	MAP2K7	0.557408	1.21944	1.14916	0.253453	0.507443
ENSG00000077044	DGKD	1.31242	3.25453	2.44632	0.0163225	0.112937
ENSG00000077063	CTTNBP2	-0.0657837	-1.10546	-0.120201	0.904585	0.958651
ENSG00000077092	RARB	-0.616575	3.114	-1.27645	0.204991	0.454569
ENSG00000077097	TOP2B	-0.209392	5.18356	-0.918429	0.360783	0.61163
ENSG00000077147	TM9SF3	-0.971577	5.73539	-4.33908	3.65e-05	0.00307631
ENSG00000077150	NFKB2	1.20356	3.53282	2.24136	0.0273946	0.151393
ENSG00000077152	UBE2T	-1.05794	-0.834462	-1.65143	0.102041	0.312556
ENSG00000077157	PPP1R12B	-0.00447087	4.4721	-0.0113632	0.990958	0.99615
ENSG00000077232	DNAJC10	-0.549049	4.99518	-1.88117	0.0630939	0.239943
ENSG00000077235	GTF3C1	0.258382	3.01278	0.63256	0.528581	0.740707
ENSG00000077238	IL4R	0.362292	4.16353	0.695252	0.48864	0.7136
ENSG00000077254	USP33	-0.0264445	5.5922	-0.111521	0.911445	0.962078
ENSG00000077264	PAK3	-0.428123	-1.41487	-0.834085	0.406382	0.650119
ENSG00000077312	SNRPA	0.880302	2.7018	1.81312	0.0730556	0.261029
ENSG00000077327	SPAG6	-0.464449	5.77948	-1.41834	0.159451	0.398011
ENSG00000077348	EXOSC5	-0.61348	-0.961057	-1.12569	0.263208	0.516545
ENSG00000077380	DYNC1I2	0.0299523	4.90573	0.0916382	0.927184	0.969035
ENSG00000077420	APBB1IP	0.65186	2.49076	1.05038	0.296281	0.550484
ENSG00000077454	LRCH4	1.70999	3.36553	4.46584	2.25e-05	0.002263
ENSG00000077458	FAM76B	0.0807567	4.06338	0.180482	0.857169	0.934126
ENSG00000077463	SIRT6	1.72818	0.0568302	3.21546	0.00179441	0.0309391
ENSG00000077498	TYR	-1.2543	-2.08539	-3.02259	0.00324199	0.0438694
ENSG00000077514	POLD3	-0.152234	4.05788	-0.379035	0.70553	0.85325
ENSG00000077549	CAPZB	0.375242	5.93029	1.81631	0.0725612	0.259939
ENSG00000077585	GPR137B	-0.295	3.16576	-0.53419	0.594492	0.785621
ENSG00000077616	NAALAD2	-0.339898	-1.40996	-0.653483	0.515066	0.730755
ENSG00000077684	JADE1	-0.634695	2.68632	-1.6572	0.100867	0.310613
ENSG00000077713	SLC25A43	-0.885801	1.07542	-1.65289	0.101744	0.312318
ENSG00000077721	UBE2A	-0.63599	5.04808	-1.96127	0.0528544	0.218046
ENSG00000077782	FGFR1	-1.52436	1.13614	-2.36541	0.0200981	0.127183
ENSG00000077800	FKBP6	-0.476168	0.247886	-0.826268	0.410778	0.654428
ENSG00000077942	FBLN1	-0.932751	2.25231	-2.18346	0.0315323	0.162448
ENSG00000077984	CST7	0.167998	-0.0745952	0.238772	0.81181	0.911733
ENSG00000078018	MAP2	0.568585	-0.781748	1.07124	0.286847	0.540856
ENSG00000078043	PIAS2	0.0867895	3.74362	0.18793	0.851343	0.932056
ENSG00000078061	ARAF	0.468408	2.69755	1.1381	0.258017	0.511453
ENSG00000078070	MCCC1	-0.139133	2.66858	-0.272251	0.786035	0.895537
ENSG00000078081	LAMP3	2.20391	2.59531	4.05674	0.00010381	0.00616517
ENSG00000078098	FAP	-0.480532	-1.22657	-0.739815	0.461285	0.693229
ENSG00000078114	NEBL	-0.543881	5.83434	-1.91227	0.0589357	0.232097
ENSG00000078124	ACER3	-0.428728	2.59789	-0.788375	0.432493	0.670467
ENSG00000078140	UBE2K	-0.132243	4.92791	-0.528089	0.598702	0.788847
ENSG00000078142	PIK3C3	-0.186521	4.79051	-0.59603	0.552611	0.757017
ENSG00000078177	N4BP2	-0.639643	2.21836	-1.56361	0.121323	0.343729
ENSG00000078237	TIGAR	-0.669531	0.0607046	-1.32109	0.18973	0.436444
ENSG00000078246	TULP3	-0.455923	2.52341	-1.00647	0.316815	0.571056
ENSG00000078269	SYNJ2	-0.120084	2.40569	-0.342709	0.732595	0.868712
ENSG00000078295	ADCY2	0.164248	2.51071	0.298107	0.76629	0.886543
ENSG00000078304	PPP2R5C	-0.186548	6.57826	-0.934139	0.352664	0.604534
ENSG00000078328	RBFOX1	1.54179	0.994445	2.64735	0.0095365	0.0824712
ENSG00000078369	GNB1	0.336729	6.11226	1.63375	0.105709	0.318584
ENSG00000078401	EDN1	0.1591	-1.01601	0.273729	0.784903	0.895135
ENSG00000078403	MLLT10	-0.343554	4.26851	-0.883239	0.379396	0.626921
ENSG00000078487	ZCWPW1	0.0364157	1.34574	0.0658967	0.947602	0.977315
ENSG00000078589	P2RY10	0.550588	1.14335	0.923156	0.358328	0.609886
ENSG00000078596	ITM2A	-1.40081	-0.680959	-2.53481	0.0129301	0.0992529
ENSG00000078618	NRDC	-0.444265	5.89933	-1.90963	0.0592794	0.232742
ENSG00000078668	VDAC3	-0.411755	5.03036	-1.2957	0.198301	0.447122
ENSG00000078674	PCM1	-0.576818	7.18096	-2.69289	0.00840965	0.0761397
ENSG00000078687	TNRC6C	-0.0504302	1.82232	-0.120864	0.904061	0.958363
ENSG00000078699	CBFA2T2	0.872046	1.79262	2.14892	0.0342516	0.170529
ENSG00000078747	ITCH	-0.413573	5.06336	-1.51112	0.134165	0.361461
ENSG00000078795	PKD2L2	-0.849282	-1.19535	-1.8948	0.0612419	0.236382
ENSG00000078804	TP53INP2	-0.232927	4.27576	-0.799346	0.426137	0.665717
ENSG00000078808	SDF4	1.64956	3.11038	3.84403	0.000221913	0.0093153
ENSG00000078814	MYH7B	1.09579	-0.956529	2.40604	0.0181148	0.119458
ENSG00000078898	BPIFB2	-0.691172	-1.22842	-1.03387	0.303893	0.558056
ENSG00000078900	TP73	0.387655	1.67737	0.793995	0.42923	0.668402
ENSG00000078902	TOLLIP	0.341548	2.36114	0.773291	0.441322	0.67712
ENSG00000078967	UBE2D4	-0.287914	3.61172	-0.53156	0.596305	0.78723
ENSG00000079112	CDH17	-1.34593	-1.26588	-2.77451	0.00668847	0.0664899
ENSG00000079134	THOC1	0.473423	3.55949	0.862319	0.390742	0.635987
ENSG00000079150	FKBP7	-0.829728	-0.632627	-1.38979	0.167927	0.409696
ENSG00000079156	OSBPL6	-0.393957	2.93303	-0.944014	0.347621	0.599017
ENSG00000079215	SLC1A3	0.521021	0.564656	0.744066	0.458722	0.690647
ENSG00000079246	XRCC5	-0.487876	5.89644	-2.26144	0.0260747	0.146902
ENSG00000079257	LXN	0.036431	3.49757	0.0670637	0.946676	0.976822
ENSG00000079263	SP140	1.11942	2.59919	1.53371	0.128514	0.353947
ENSG00000079277	MKNK1	0.149865	3.45046	0.299255	0.765417	0.886225
ENSG00000079308	TNS1	1.02075	4.10141	2.70374	0.00815966	0.0748269
ENSG00000079313	REXO1	1.17128	1.60555	2.35045	0.0208752	0.129459
ENSG00000079332	SAR1A	0.107687	4.26422	0.388968	0.698194	0.849435
ENSG00000079335	CDC14A	-1.35572	4.29535	-3.70265	0.000362531	0.0123591
ENSG00000079337	RAPGEF3	0.172484	0.506471	0.292941	0.770223	0.888666
ENSG00000079385	CEACAM1	0.760807	3.19679	1.32565	0.18822	0.434152
ENSG00000079387	SENP1	-0.815329	3.44513	-2.19255	0.0308486	0.16065
ENSG00000079432	CIC	1.46841	2.18376	3.18457	0.00197594	0.0329309
ENSG00000079435	LIPE	0.530005	-0.27788	0.932848	0.353327	0.605229
ENSG00000079459	FDFT1	-0.420438	5.05814	-1.5542	0.123552	0.346852
ENSG00000079462	PAFAH1B3	0.129198	-0.343242	0.205647	0.837518	0.924282
ENSG00000079482	OPHN1	-0.915239	1.95871	-2.14132	0.0348761	0.17289
ENSG00000079616	KIF22	0.649631	1.78211	1.28367	0.202462	0.45164
ENSG00000079691	CARMIL1	-0.306523	3.34608	-0.916545	0.361764	0.612739
ENSG00000079739	PGM1	-0.139578	0.994372	-0.268407	0.788984	0.897253
ENSG00000079785	DDX1	-0.639823	4.1068	-1.78663	0.0772724	0.268944
ENSG00000079805	DNM2	0.507525	5.15743	1.88593	0.0624411	0.238635
ENSG00000079819	EPB41L2	0.859388	2.96069	1.70175	0.0921601	0.29579
ENSG00000079841	RIMS1	-0.130497	4.71736	-0.332607	0.740183	0.872801
ENSG00000079950	STX7	0.430822	4.35007	1.48524	0.140881	0.371921
ENSG00000079974	RABL2B	-0.227189	4.90742	-0.619261	0.537267	0.746954
ENSG00000079999	KEAP1	0.666751	2.78605	1.32856	0.187262	0.433431
ENSG00000080007	DDX43	0.267094	-1.17054	0.486622	0.627677	0.807226
ENSG00000080031	PTPRH	0.962782	-0.463398	1.96222	0.0527417	0.2179
ENSG00000080189	SLC35C2	1.29708	1.96863	2.58672	0.0112487	0.0911036
ENSG00000080200	CRYBG3	-0.765535	2.13261	-1.91292	0.0588508	0.231926
ENSG00000080298	RFX3	-0.356252	5.48356	-1.00232	0.318804	0.572523
ENSG00000080345	RIF1	-0.56974	3.73853	-1.8588	0.0662341	0.246337
ENSG00000080371	RAB21	-0.550606	4.19173	-1.2612	0.210407	0.461369
ENSG00000080493	SLC4A4	0.614098	0.468735	1.23455	0.220123	0.472445
ENSG00000080503	SMARCA2	-0.0222098	6.86664	-0.10295	0.918225	0.965243
ENSG00000080546	SESN1	-0.402619	3.53625	-0.784407	0.434805	0.671868
ENSG00000080561	MID2	-0.267989	1.7218	-0.517528	0.606023	0.793371
ENSG00000080572	PIH1D3	-1.09987	1.27351	-1.67518	0.097276	0.303932
ENSG00000080603	SRCAP	1.05145	2.78682	2.43641	0.0167484	0.114899
ENSG00000080608	PUM3	-0.340497	3.38354	-0.746088	0.457506	0.689827
ENSG00000080709	KCNN2	-0.326026	-1.44359	-0.680486	0.497897	0.719223
ENSG00000080802	CNOT4	-0.101699	3.96294	-0.347095	0.729308	0.866669
ENSG00000080815	PSEN1	-0.0431321	4.76721	-0.136775	0.891506	0.951932
ENSG00000080819	CPOX	-0.176909	-0.0561457	-0.33868	0.735618	0.871075
ENSG00000080822	CLDND1	0.327873	4.33408	0.712399	0.47801	0.706926
ENSG00000080823	MOK	-0.191309	5.3226	-0.560724	0.576341	0.774815
ENSG00000080824	HSP90AA1	-0.146759	7.899	-0.807488	0.421456	0.662218
ENSG00000080839	RBL1	-0.305045	0.602322	-0.60918	0.543898	0.751198
ENSG00000080845	DLGAP4	1.21743	3.62482	2.82704	0.00575778	0.0608552
ENSG00000080986	NDC80	-0.275183	0.558446	-0.388809	0.698311	0.849435
ENSG00000081014	AP4E1	-1.24249	1.57567	-2.45518	0.01595	0.11165
ENSG00000081019	RSBN1	-0.845881	2.49024	-1.97401	0.0513639	0.214544
ENSG00000081026	MAGI3	-0.612682	3.10082	-1.62089	0.108445	0.322915
ENSG00000081041	CXCL2	-1.31969	2.51196	-1.76116	0.0815158	0.277202
ENSG00000081059	TCF7	1.13798	1.92761	2.22127	0.0287727	0.15512
ENSG00000081087	OSTM1	-1.1955	3.02867	-2.27159	0.0254293	0.144684
ENSG00000081154	PCNP	-0.368516	5.359	-1.52335	0.131082	0.35727
ENSG00000081177	EXD2	-0.816136	1.43902	-1.55642	0.123023	0.345887
ENSG00000081181	ARG2	0.148414	1.33968	0.212079	0.832512	0.921688
ENSG00000081189	MEF2C	1.36729	3.17964	2.11227	0.0373573	0.179346
ENSG00000081237	PTPRC	-0.188982	6.66185	-0.45885	0.647418	0.81911
ENSG00000081277	PKP1	-0.671913	0.341849	-1.19567	0.234881	0.488294
ENSG00000081307	UBA5	-0.230205	3.64206	-0.527298	0.599249	0.78933
ENSG00000081320	STK17B	-0.0163377	6.02104	-0.0530747	0.957787	0.980624
ENSG00000081377	CDC14B	-0.788202	4.14396	-1.89116	0.0617313	0.237185
ENSG00000081386	ZNF510	0.274465	0.974269	0.526432	0.599848	0.789614
ENSG00000081479	LRP2	-0.83781	-1.59151	-2.0325	0.0449692	0.199698
ENSG00000081665	ZNF506	-0.695582	3.68816	-1.91057	0.059157	0.232742
ENSG00000081692	JMJD4	-0.223255	-0.496112	-0.408795	0.683635	0.840278
ENSG00000081721	DUSP12	0.328942	0.23978	0.584889	0.560046	0.763009
ENSG00000081760	AACS	-0.307059	2.55646	-0.678646	0.499057	0.720309
ENSG00000081791	DELE1	0.552371	2.80099	1.29415	0.198837	0.447682
ENSG00000081803	CADPS2	-0.930701	2.25533	-2.05534	0.0426648	0.193844
ENSG00000081870	HSPB11	0.161712	4.8169	0.3824	0.703041	0.851478
ENSG00000081913	PHLPP1	-0.280412	3.16802	-0.613655	0.540949	0.749627
ENSG00000081923	ATP8B1	-0.108861	3.57763	-0.276878	0.782491	0.893815
ENSG00000081985	IL12RB2	0.918392	-0.783531	1.78822	0.0770138	0.268523
ENSG00000082014	SMARCD3	-0.266665	0.0902918	-0.449483	0.654135	0.823473
ENSG00000082068	WDR70	0.444051	3.12099	0.820808	0.413866	0.656274
ENSG00000082074	FYB1	0.809359	4.76229	1.39106	0.167545	0.409249
ENSG00000082126	MPP4	-1.24191	0.0499994	-2.33615	0.0216432	0.131886
ENSG00000082146	STRADB	-2.13326	1.71493	-3.80454	0.000254812	0.0102239
ENSG00000082153	BZW1	-0.495681	7.09723	-2.44742	0.0162759	0.112937
ENSG00000082196	C1QTNF3	-0.544733	-1.40427	-1.10215	0.273254	0.527068
ENSG00000082212	ME2	0.003373	4.00756	0.0132789	0.989434	0.995152
ENSG00000082213	C5orf22	-0.734799	3.16703	-1.78055	0.0782687	0.271087
ENSG00000082258	CCNT2	-0.118318	4.11715	-0.312195	0.755595	0.881031
ENSG00000082269	FAM135A	-0.410389	3.72767	-0.97536	0.331925	0.584283
ENSG00000082293	COL19A1	1.10331	-0.862328	2.32012	0.0225339	0.134735
ENSG00000082397	EPB41L3	0.364742	1.75075	0.597048	0.551934	0.756641
ENSG00000082438	COBLL1	-0.513144	4.58298	-1.56356	0.121336	0.343729
ENSG00000082458	DLG3	0.155025	3.60301	0.373576	0.709574	0.855583
ENSG00000082482	KCNK2	-0.857949	-1.80178	-2.0215	0.0461177	0.202701
ENSG00000082497	SERTAD4	-1.5227	0.818616	-2.77729	0.00663603	0.0661283
ENSG00000082512	TRAF5	0.561179	1.11086	1.12153	0.264964	0.518495
ENSG00000082515	MRPL22	-1.2338	1.90882	-2.19195	0.0308934	0.16065
ENSG00000082516	GEMIN5	-0.393846	-0.101292	-0.823563	0.412306	0.655677
ENSG00000082641	NFE2L1	0.480804	4.53103	1.1702	0.244928	0.498173
ENSG00000082684	SEMA5B	-0.655332	-1.64388	-1.49278	0.138898	0.368637
ENSG00000082701	GSK3B	-0.874259	3.99951	-3.35608	0.00114817	0.024033
ENSG00000082781	ITGB5	-0.156764	1.52038	-0.288036	0.773964	0.890002
ENSG00000082805	ERC1	0.0505329	4.35738	0.154527	0.877531	0.944354
ENSG00000082898	XPO1	0.251911	6.21052	1.07049	0.287184	0.541165
ENSG00000082996	RNF13	-0.837014	6.26522	-3.59986	0.000514199	0.0152386
ENSG00000083067	TRPM3	-0.98347	-1.40227	-1.98885	0.0496726	0.210929
ENSG00000083093	PALB2	-0.16109	0.856732	-0.295444	0.768317	0.887643
ENSG00000083097	DOP1A	0.239366	3.73677	0.57738	0.565086	0.767386
ENSG00000083099	LYRM2	-0.512073	4.2526	-1.35813	0.177726	0.421047
ENSG00000083123	BCKDHB	-0.957032	0.883046	-1.53959	0.127073	0.351791
ENSG00000083168	KAT6A	-0.0481545	4.5111	-0.21088	0.833444	0.922324
ENSG00000083223	TUT7	-0.306536	4.98415	-1.17959	0.241187	0.494938
ENSG00000083290	ULK2	-0.189556	2.35881	-0.325854	0.745271	0.876107
ENSG00000083307	GRHL2	0.280866	4.35069	0.610018	0.543345	0.750806
ENSG00000083312	TNPO1	-0.0466001	5.35211	-0.193869	0.846703	0.929696
ENSG00000083444	PLOD1	0.449755	0.792107	1.04969	0.296594	0.550662
ENSG00000083454	P2RX5	3.30069	-0.397607	6.00952	3.65e-08	3.64e-05
ENSG00000083457	ITGAE	1.05348	2.40944	1.84562	0.0681458	0.25044
ENSG00000083520	DIS3	-0.987919	3.36961	-3.51447	0.000684136	0.0181217
ENSG00000083535	PIBF1	-0.0485442	4.01599	-0.106715	0.915246	0.963581
ENSG00000083544	TDRD3	-0.87936	3.26966	-2.19396	0.0307437	0.16065
ENSG00000083635	NUFIP1	0.0544039	-1.18881	0.122118	0.90307	0.957788
ENSG00000083642	PDS5B	0.142691	4.1043	0.416426	0.678063	0.837478
ENSG00000083720	OXCT1	-0.235452	1.85674	-0.485262	0.628638	0.807801
ENSG00000083750	RRAGB	-0.188289	0.887334	-0.285148	0.776168	0.890949
ENSG00000083799	CYLD	0.282826	5.34038	1.21489	0.227501	0.480766
ENSG00000083807	SLC27A5	-0.305294	0.0192059	-0.662951	0.50901	0.726686
ENSG00000083812	ZNF324	0.666387	-0.442157	1.40977	0.16196	0.401306
ENSG00000083814	ZNF671	0.989429	-1.10777	2.20007	0.0302923	0.159183
ENSG00000083817	ZNF416	0.0591569	-1.87955	0.155171	0.877025	0.944181
ENSG00000083828	ZNF586	0.172392	2.6178	0.402543	0.688213	0.843222
ENSG00000083838	ZNF446	0.931302	-0.986713	2.11892	0.0367768	0.177893
ENSG00000083844	ZNF264	0.181121	2.82039	0.607076	0.545288	0.752037
ENSG00000083845	RPS5	0.0884851	6.87812	0.349369	0.727606	0.865664
ENSG00000083857	FAT1	-0.50567	3.19391	-1.13455	0.259496	0.513032
ENSG00000083896	YTHDC1	-0.514495	5.88994	-2.23602	0.0277552	0.152323
ENSG00000083937	CHMP2B	-0.706102	3.97099	-1.8829	0.0628559	0.239544
ENSG00000084070	SMAP2	0.111491	4.84529	0.332336	0.740388	0.872872
ENSG00000084072	PPIE	-0.0188462	3.06891	-0.0463846	0.963104	0.983676
ENSG00000084073	ZMPSTE24	-0.775867	3.51122	-2.11	0.0375578	0.179817
ENSG00000084090	STARD7	-0.0935951	5.11528	-0.431829	0.66687	0.830836
ENSG00000084092	NOA1	-0.4051	2.03877	-0.961702	0.338706	0.590458
ENSG00000084093	REST	-0.461199	3.86245	-1.72607	0.087673	0.28811
ENSG00000084110	HAL	-1.02886	0.0832509	-1.35493	0.178738	0.422396
ENSG00000084112	SSH1	-0.080248	3.03303	-0.216833	0.828816	0.920402
ENSG00000084207	GSTP1	-0.0374408	7.772	-0.134748	0.893104	0.952755
ENSG00000084234	APLP2	-0.483137	5.80015	-2.28488	0.0246055	0.141961
ENSG00000084444	FAM234B	-0.208411	-1.15409	-0.483999	0.629531	0.808162
ENSG00000084453	SLCO1A2	-0.412579	-0.86172	-0.695778	0.488312	0.71354
ENSG00000084463	WBP11	0.708216	3.68867	2.16071	0.033301	0.167919
ENSG00000084623	EIF3I	0.147736	4.7414	0.513386	0.608905	0.794728
ENSG00000084636	COL16A1	1.68238	-0.22516	3.11378	0.0024585	0.0375449
ENSG00000084652	TXLNA	0.239464	2.68464	0.769472	0.443573	0.678993
ENSG00000084676	NCOA1	-0.0941116	3.76962	-0.285728	0.775725	0.890846
ENSG00000084693	AGBL5	-0.428317	2.13571	-1.00553	0.317263	0.571516
ENSG00000084710	EFR3B	-0.332171	-0.807046	-0.689588	0.49218	0.715841
ENSG00000084731	KIF3C	-0.00187008	-1.18135	-0.00371032	0.997048	0.998463
ENSG00000084733	RAB10	-0.00780384	5.26447	-0.0394714	0.9686	0.985255
ENSG00000084734	GCKR	0.163725	-2.01483	0.419421	0.67588	0.835744
ENSG00000084754	HADHA	0.114442	4.264	0.479894	0.632435	0.810191
ENSG00000084764	MAPRE3	0.689889	3.29987	1.36301	0.176187	0.419646
ENSG00000084774	CAD	-0.0507398	0.670959	-0.0932757	0.925886	0.968331
ENSG00000085063	CD59	-0.311863	6.4848	-1.48471	0.141021	0.372161
ENSG00000085117	CD82	0.740298	4.39872	1.65462	0.10139	0.311646
ENSG00000085185	BCORL1	0.469042	-1.33805	1.0045	0.317756	0.571934
ENSG00000085224	ATRX	-0.105841	5.78808	-0.428564	0.669237	0.832292
ENSG00000085231	AK6	0.102379	2.44118	0.148369	0.882375	0.947034
ENSG00000085265	FCN1	-0.253855	-0.55546	-0.504519	0.615096	0.798464
ENSG00000085274	MYNN	-0.399436	1.67904	-0.777379	0.438919	0.674803
ENSG00000085276	MECOM	-0.166633	5.08253	-0.620286	0.536595	0.746415
ENSG00000085365	SCAMP1	-0.67807	3.69599	-1.67743	0.0968331	0.302927
ENSG00000085377	PREP	-0.548611	1.30394	-1.22249	0.224626	0.477107
ENSG00000085382	HACE1	-0.699227	2.86972	-1.58252	0.116944	0.336823
ENSG00000085415	SEH1L	-0.267849	3.1843	-0.586553	0.558933	0.762185
ENSG00000085433	WDR47	-0.442626	1.97684	-0.881619	0.380268	0.627463
ENSG00000085449	WDFY1	0.400355	4.98335	1.34962	0.18043	0.424979
ENSG00000085465	OVGP1	-0.337188	-0.966042	-0.722912	0.471557	0.701593
ENSG00000085491	SLC25A24	-0.592281	3.54681	-1.71758	0.0892184	0.29102
ENSG00000085511	MAP3K4	-0.00766269	4.0119	-0.0162591	0.987063	0.993862
ENSG00000085514	PILRA	0.0115931	0.920754	0.016549	0.986832	0.993862
ENSG00000085552	IGSF9	0.172367	-0.729248	0.388643	0.698433	0.849435
ENSG00000085563	ABCB1	0.250933	-1.53804	0.491743	0.624066	0.805222
ENSG00000085644	ZNF213	0.0462864	-0.660976	0.0914997	0.927293	0.969035
ENSG00000085662	AKR1B1	0.44017	2.42961	0.829577	0.408913	0.652372
ENSG00000085719	CPNE3	-0.579596	5.12374	-2.4897	0.0145711	0.107231
ENSG00000085721	RRN3	0.0646488	3.07023	0.149156	0.881756	0.947034
ENSG00000085733	CTTN	0.504692	4.84677	1.81881	0.0721752	0.25932
ENSG00000085760	MTIF2	0.503534	2.47175	0.91032	0.365019	0.615677
ENSG00000085788	DDHD2	-0.045449	3.62152	-0.103351	0.917908	0.965136
ENSG00000085831	TTC39A	0.172696	3.3363	0.345557	0.73046	0.867556
ENSG00000085832	EPS15	-0.271882	5.39217	-1.39496	0.166367	0.407451
ENSG00000085840	ORC1	0.327715	-1.90107	0.930513	0.354527	0.606661
ENSG00000085871	MGST2	-0.454028	3.46075	-0.879057	0.381648	0.628375
ENSG00000085872	CHERP	0.880666	1.70258	1.92294	0.0575631	0.229364
ENSG00000085978	ATG16L1	0.443087	3.5475	0.930171	0.354704	0.606824
ENSG00000085982	USP40	-0.575521	4.12573	-1.38472	0.169468	0.411673
ENSG00000085998	POMGNT1	0.113447	2.67747	0.204643	0.838301	0.924608
ENSG00000085999	RAD54L	0.0273606	-0.430416	0.0429628	0.965824	0.984064
ENSG00000086015	MAST2	-0.435671	2.87905	-0.978633	0.330314	0.582888
ENSG00000086061	DNAJA1	0.153053	6.17345	0.749371	0.455535	0.688442
ENSG00000086062	B4GALT1	-0.35735	4.2918	-1.56293	0.121484	0.343757
ENSG00000086065	CHMP5	-0.222945	4.6401	-0.763051	0.447375	0.681532
ENSG00000086102	NFX1	-0.273845	4.25271	-1.21871	0.226052	0.478836
ENSG00000086189	DIMT1	-0.653708	3.69361	-1.61435	0.109857	0.32532
ENSG00000086200	IPO11	-0.937035	3.65262	-1.92056	0.0578671	0.230124
ENSG00000086205	FOLH1	0.0720597	0.366522	0.106516	0.915404	0.963581
ENSG00000086232	EIF2AK1	0.0470525	4.48234	0.156155	0.876251	0.943858
ENSG00000086289	EPDR1	-0.939535	-0.543146	-1.77312	0.0794995	0.273578
ENSG00000086300	SNX10	0.571846	3.29234	0.762183	0.447889	0.682002
ENSG00000086475	SEPHS1	-0.525897	3.36704	-1.12035	0.265465	0.518959
ENSG00000086504	MRPL28	0.251573	1.88909	0.44799	0.655208	0.823882
ENSG00000086544	ITPKC	0.0621175	2.64245	0.137319	0.891077	0.951678
ENSG00000086548	CEACAM6	-0.227603	5.66562	-0.798646	0.426541	0.66614
ENSG00000086570	FAT2	-0.324594	0.0230682	-0.703242	0.483671	0.710573
ENSG00000086589	RBM22	0.21525	4.28312	0.685135	0.494972	0.71756
ENSG00000086598	TMED2	-0.256299	5.44862	-1.15049	0.252908	0.506832
ENSG00000086619	ERO1B	-1.05798	1.32475	-1.9887	0.0496894	0.210929
ENSG00000086666	ZFAND6	-0.084335	6.13871	-0.325135	0.745813	0.876415
ENSG00000086696	HSD17B2	-0.685898	0.891321	-1.23798	0.218855	0.47074
ENSG00000086712	TXLNG	-0.516763	1.28851	-1.07417	0.285538	0.539567
ENSG00000086730	LAT2	1.99342	1.24777	3.16513	0.00209884	0.0340685
ENSG00000086758	HUWE1	-0.327696	5.25299	-1.53892	0.127238	0.351891
ENSG00000086827	ZW10	-0.638135	0.965574	-1.10608	0.271559	0.525424
ENSG00000086848	ALG9	-1.47683	2.93315	-3.28473	0.00144238	0.0273942
ENSG00000086991	NOX4	-1.77964	-0.955038	-3.84365	0.000222208	0.0093153
ENSG00000087008	ACOX3	0.39555	3.29585	0.793016	0.429798	0.668536
ENSG00000087053	MTMR2	-0.446122	3.85733	-1.04968	0.296598	0.550662
ENSG00000087074	PPP1R15A	0.581274	5.4655	1.37067	0.173795	0.416895
ENSG00000087077	TRIP6	0.807612	2.86026	2.05451	0.0427468	0.193922
ENSG00000087086	FTL	0.0618378	10.1762	0.309995	0.757262	0.881533
ENSG00000087087	SRRT	0.957169	4.52977	2.15678	0.0336149	0.168933
ENSG00000087088	BAX	1.76734	2.60774	2.84389	0.00548544	0.0592366
ENSG00000087095	NLK	-0.434056	2.79581	-0.942612	0.348335	0.599886
ENSG00000087111	PIGS	-0.266959	2.1894	-0.506888	0.613439	0.797631
ENSG00000087128	TMPRSS11E	-1.35905	0.517066	-1.81754	0.0723719	0.259678
ENSG00000087152	ATXN7L3	1.55882	3.11543	3.09362	0.0026148	0.0388225
ENSG00000087157	PGS1	0.286527	4.02759	0.707196	0.481222	0.708925
ENSG00000087191	PSMC5	0.296164	4.57886	0.728252	0.468299	0.699108
ENSG00000087206	UIMC1	-0.208773	3.34082	-0.399314	0.690582	0.844867
ENSG00000087237	CETP	0.912395	-1.56321	1.89334	0.0614386	0.236555
ENSG00000087250	MT3	-0.0576128	-0.576101	-0.0795559	0.936762	0.972839
ENSG00000087253	LPCAT2	-1.41655	1.64067	-2.35752	0.020505	0.128293
ENSG00000087258	GNAO1	0.542781	-1.68064	1.2317	0.221184	0.473703
ENSG00000087263	OGFOD1	-0.157807	3.11601	-0.426594	0.670666	0.833031
ENSG00000087266	SH3BP2	1.36969	3.9595	3.5612	0.000585473	0.0165013
ENSG00000087269	NOP14	0.601517	1.94142	1.47653	0.143197	0.375597
ENSG00000087274	ADD1	0.0694559	5.51088	0.279758	0.780288	0.892887
ENSG00000087299	L2HGDH	-0.186306	0.448666	-0.409531	0.683097	0.840173
ENSG00000087301	TXNDC16	-1.42015	-0.402248	-2.63809	0.00978179	0.0835263
ENSG00000087302	RTRAF	-0.374429	4.50825	-1.01004	0.315112	0.569388
ENSG00000087303	NID2	-0.541838	-2.06504	-1.25475	0.212729	0.464343
ENSG00000087338	GMCL1	-0.840017	2.46817	-1.75238	0.0830211	0.279967
ENSG00000087365	SF3B2	0.403972	5.23161	1.58366	0.116684	0.336281
ENSG00000087448	KLHL42	-0.486258	0.677535	-1.1557	0.250781	0.504389
ENSG00000087460	GNAS	0.00240198	8.05131	0.0161881	0.987119	0.993862
ENSG00000087470	DNM1L	0.193078	4.45758	0.464701	0.643237	0.816273
ENSG00000087494	PTHLH	0.198876	-1.3427	0.360871	0.719019	0.861311
ENSG00000087495	PHACTR3	-1.55256	1.11436	-3.11579	0.00244341	0.0374289
ENSG00000087502	ERGIC2	-0.305416	4.8533	-0.734546	0.464474	0.696202
ENSG00000087510	TFAP2C	-0.29152	0.974197	-0.655788	0.513588	0.729872
ENSG00000087586	AURKA	0.495084	-0.931223	1.04265	0.29983	0.554324
ENSG00000087589	CASS4	0.00545373	-0.0622992	0.00878267	0.993011	0.996956
ENSG00000087842	PIR	-0.512113	1.99652	-0.87995	0.381167	0.627971
ENSG00000087884	AAMDC	-0.931421	1.62367	-1.383	0.169994	0.412405
ENSG00000087903	RFX2	-0.730261	4.67823	-1.9142	0.0586859	0.231679
ENSG00000087995	METTL2A	-1.01625	1.7297	-2.27371	0.0252966	0.144392
ENSG00000088002	SULT2B1	-0.639376	-0.56904	-1.16177	0.248318	0.501394
ENSG00000088035	ALG6	-0.924047	1.1615	-1.51052	0.134318	0.361677
ENSG00000088038	CNOT3	0.900897	2.23447	1.78897	0.0768932	0.268373
ENSG00000088053	GP6	-0.0668595	-0.781162	-0.117822	0.906464	0.959281
ENSG00000088179	PTPN4	0.266071	3.3244	0.592212	0.555153	0.759246
ENSG00000088205	DDX18	-0.253046	4.56672	-0.95188	0.343638	0.594795
ENSG00000088247	KHSRP	0.662545	4.62168	2.27685	0.0251003	0.143707
ENSG00000088256	GNA11	0.639064	3.42037	1.48752	0.140279	0.371051
ENSG00000088280	ASAP3	0.551351	2.53819	1.03078	0.305332	0.559795
ENSG00000088298	EDEM2	0.833246	0.378981	1.6439	0.103591	0.315077
ENSG00000088305	DNMT3B	-0.05118	-2.18737	-0.138696	0.889992	0.951343
ENSG00000088325	TPX2	1.08796	-0.864589	2.43188	0.0169462	0.115407
ENSG00000088356	PDRG1	-0.59581	-0.349592	-1.16941	0.245244	0.49834
ENSG00000088367	EPB41L1	-0.182181	4.34987	-0.559884	0.576911	0.774918
ENSG00000088386	SLC15A1	-0.480479	-0.917692	-1.07092	0.28699	0.541012
ENSG00000088387	DOCK9	0.0692165	4.72227	0.18359	0.854737	0.933256
ENSG00000088448	ANKRD10	-0.0393063	6.32757	-0.0623938	0.950384	0.97833
ENSG00000088451	TGDS	-1.10266	1.58384	-1.74452	0.0843895	0.282166
ENSG00000088543	C3orf18	0.042894	-1.19494	0.087114	0.930769	0.970521
ENSG00000088682	COQ9	-0.0626061	3.36265	-0.158528	0.874387	0.942809
ENSG00000088726	TMEM40	-0.312136	1.72553	-0.557945	0.57823	0.775504
ENSG00000088727	KIF9	-0.018241	3.48702	-0.0374102	0.970239	0.985976
ENSG00000088756	ARHGAP28	-1.09666	1.06884	-2.00313	0.0480892	0.207049
ENSG00000088766	CRLS1	-0.203426	4.37349	-0.563799	0.574255	0.773773
ENSG00000088808	PPP1R13B	-0.138462	3.37132	-0.299057	0.765567	0.886225
ENSG00000088812	ATRN	-0.865121	2.03417	-2.25586	0.026436	0.147873
ENSG00000088826	SMOX	0.236244	-1.24651	0.486242	0.627946	0.807235
ENSG00000088827	SIGLEC1	2.86028	-0.991733	5.63573	1.87e-07	0.000100055
ENSG00000088832	FKBP1A	0.0352167	5.40804	0.124463	0.901219	0.957275
ENSG00000088833	NSFL1C	0.0682715	4.01952	0.22561	0.822002	0.916719
ENSG00000088836	SLC4A11	1.7066	3.81733	2.76675	0.00683716	0.0673191
ENSG00000088854	C20orf194	-0.291825	1.57021	-0.807398	0.421508	0.662218
ENSG00000088876	ZNF343	0.528229	-1.38601	1.42107	0.15866	0.397074
ENSG00000088881	EBF4	2.56008	0.327269	4.40578	2.83e-05	0.00263238
ENSG00000088888	MAVS	-0.168329	1.67984	-0.572084	0.568653	0.769342
ENSG00000088899	LZTS3	1.14799	0.406984	2.83675	0.00559929	0.0595974
ENSG00000088930	XRN2	-0.48624	3.90682	-1.99368	0.0491321	0.20955
ENSG00000088970	KIZ	-1.04655	2.16183	-1.94996	0.0542084	0.22136
ENSG00000088986	DYNLL1	-0.261341	7.73042	-1.11958	0.26579	0.518959
ENSG00000088992	TESC	0.854863	-1.21804	1.38628	0.168994	0.411179
ENSG00000089006	SNX5	0.053718	5.29971	0.184773	0.853812	0.932848
ENSG00000089009	RPL6	0.184366	7.29187	0.804787	0.423006	0.663666
ENSG00000089012	SIRPG	0.649189	-1.8767	1.70483	0.0915822	0.294894
ENSG00000089022	MAPKAPK5	0.146914	3.21689	0.410378	0.682478	0.839688
ENSG00000089041	P2RX7	0.755723	-0.186159	1.30217	0.196092	0.444384
ENSG00000089048	ESF1	0.408949	2.65744	1.06999	0.287406	0.541194
ENSG00000089050	RBBP9	-1.53593	2.99985	-3.72115	0.000340203	0.011896
ENSG00000089053	ANAPC5	0.0214718	5.46988	0.083169	0.933897	0.97131
ENSG00000089057	SLC23A2	0.154298	2.88672	0.368177	0.713582	0.858617
ENSG00000089060	SLC8B1	1.59512	1.68498	3.21241	0.00181157	0.0311274
ENSG00000089063	TMEM230	-0.77316	4.76607	-2.56221	0.0120164	0.094651
ENSG00000089091	DZANK1	-0.430188	1.84667	-0.973333	0.332926	0.585196
ENSG00000089094	KDM2B	1.41649	2.56469	3.21594	0.00179171	0.0309281
ENSG00000089101	CFAP61	-0.931657	4.22593	-1.74251	0.0847426	0.282715
ENSG00000089123	TASP1	-0.344496	2.34169	-0.657889	0.512243	0.728868
ENSG00000089127	OAS1	3.17094	5.10951	5.94611	4.83e-08	3.85e-05
ENSG00000089154	GCN1	1.39165	3.27865	2.95175	0.00400385	0.0490811
ENSG00000089157	RPLP0	0.190914	7.82719	0.850847	0.397051	0.64263
ENSG00000089159	PXN	0.285984	4.89491	1.00275	0.318599	0.572453
ENSG00000089169	RPH3A	-0.107728	-1.15833	-0.18386	0.854526	0.933224
ENSG00000089177	KIF16B	-0.254697	1.42647	-0.484586	0.629115	0.808045
ENSG00000089195	TRMT6	-1.01938	1.18872	-2.14627	0.034468	0.171414
ENSG00000089220	PEBP1	-0.169369	5.09392	-0.684364	0.495456	0.71795
ENSG00000089234	BRAP	0.225126	2.44989	0.550541	0.583275	0.778525
ENSG00000089248	ERP29	-0.00481565	2.41444	-0.010847	0.991369	0.996161
ENSG00000089280	FUS	0.382362	6.42225	1.69019	0.0943577	0.298869
ENSG00000089289	IGBP1	-0.66705	3.36756	-1.69158	0.094092	0.298782
ENSG00000089327	FXYD5	0.849745	2.38192	1.45385	0.149372	0.383976
ENSG00000089335	ZNF302	0.0961667	3.26486	0.242464	0.808958	0.910564
ENSG00000089351	GRAMD1A	0.737686	2.58982	1.35885	0.177497	0.420823
ENSG00000089356	FXYD3	0.116328	6.37277	0.461039	0.645852	0.818029
ENSG00000089486	CDIP1	1.12472	0.188377	1.99129	0.0493989	0.210236
ENSG00000089505	CMTM1	-0.226118	-1.52091	-0.469123	0.640085	0.814446
ENSG00000089597	GANAB	-0.012312	4.2313	-0.0374162	0.970234	0.985976
ENSG00000089639	GMIP	1.81625	2.09402	3.1882	0.00195372	0.0326577
ENSG00000089682	RBM41	-0.165823	1.83453	-0.33598	0.737647	0.87194
ENSG00000089685	BIRC5	0.144082	-0.564447	0.258266	0.796775	0.902349
ENSG00000089692	LAG3	3.73553	-0.00171941	7.94412	4.56e-12	6.83e-08
ENSG00000089693	MLF2	0.369488	4.99221	1.2793	0.203989	0.453761
ENSG00000089723	OTUB2	0.31375	-1.86535	0.925697	0.357012	0.608616
ENSG00000089737	DDX24	0.752816	4.88613	2.48609	0.0147101	0.10772
ENSG00000089775	ZBTB25	-0.0114806	1.5482	-0.0266214	0.978819	0.989512
ENSG00000089818	NECAP1	0.392875	3.67779	1.2078	0.230203	0.483472
ENSG00000089820	ARHGAP4	2.61229	2.0099	4.60142	1.33e-05	0.0015447
ENSG00000089876	DHX32	-0.20505	4.42044	-0.549251	0.584157	0.779049
ENSG00000089902	RCOR1	-0.691721	3.45007	-1.98908	0.0496461	0.210901
ENSG00000089916	GPATCH2L	0.131592	3.38919	0.337301	0.736654	0.871385
ENSG00000090006	LTBP4	1.83056	2.58509	2.95055	0.00401803	0.0491692
ENSG00000090013	BLVRB	0.150623	2.70605	0.288119	0.7739	0.890002
ENSG00000090020	SLC9A1	0.291961	2.34534	0.680845	0.49767	0.719172
ENSG00000090054	SPTLC1	-0.732563	4.5523	-2.06077	0.042132	0.192593
ENSG00000090060	PAPOLA	-0.26818	6.96801	-1.37334	0.172966	0.415922
ENSG00000090061	CCNK	-0.274985	4.55021	-0.869502	0.386823	0.632654
ENSG00000090097	PCBP4	0.660831	-0.467231	1.23287	0.220749	0.4733
ENSG00000090104	RGS1	1.9592	3.87676	2.88578	0.00485865	0.0554527
ENSG00000090238	YPEL3	0.0885879	4.15825	0.237048	0.813144	0.912167
ENSG00000090263	MRPS33	-0.785707	3.47126	-1.52741	0.130071	0.355961
ENSG00000090266	NDUFB2	0.121627	4.79755	0.222573	0.824359	0.917596
ENSG00000090273	NUDC	1.29292	3.01132	3.29319	0.00140416	0.0270112
ENSG00000090316	MAEA	0.425112	4.40284	1.46011	0.147649	0.381159
ENSG00000090339	ICAM1	0.833936	2.6071	1.23844	0.218685	0.470709
ENSG00000090372	STRN4	0.672316	4.10029	1.81308	0.0730626	0.261029
ENSG00000090376	IRAK3	-0.36265	4.21774	-0.994901	0.322379	0.575703
ENSG00000090382	LYZ	-0.068435	6.61134	-0.228083	0.820085	0.915956
ENSG00000090432	MUL1	-0.144834	-0.753579	-0.348222	0.728465	0.866093
ENSG00000090447	TFAP4	1.03024	0.735005	2.16528	0.0329385	0.166653
ENSG00000090470	PDCD7	-0.251128	0.944558	-0.541213	0.589661	0.782481
ENSG00000090487	SPG21	0.383042	4.59772	1.19073	0.236807	0.4907
ENSG00000090520	DNAJB11	-0.0100685	2.66815	-0.0214379	0.982942	0.992064
ENSG00000090530	P3H2	0.0258189	-1.10366	0.0448629	0.964313	0.983964
ENSG00000090554	FLT3LG	1.05847	0.177047	1.95778	0.0532694	0.218959
ENSG00000090565	RAB11FIP3	1.29756	1.72138	2.54749	0.0124995	0.0971308
ENSG00000090581	GNPTG	0.478474	2.60254	0.905618	0.36749	0.617476
ENSG00000090612	ZNF268	-0.276681	1.84063	-0.570743	0.569558	0.770149
ENSG00000090615	GOLGA3	0.551652	3.58681	1.75883	0.0819135	0.277797
ENSG00000090621	PABPC4	-0.0685125	5.7568	-0.309934	0.757308	0.881533
ENSG00000090659	CD209	0.94603	-1.27818	2.08187	0.0401159	0.186916
ENSG00000090661	CERS4	0.0563467	1.93253	0.0992568	0.921149	0.966291
ENSG00000090674	MCOLN1	-0.0613947	1.54078	-0.10763	0.914522	0.963244
ENSG00000090686	USP48	-0.0117589	4.80798	-0.0353561	0.971872	0.986439
ENSG00000090776	EFNB1	-0.410319	-1.88418	-1.18054	0.240813	0.494513
ENSG00000090857	PDPR	0.743996	2.48094	2.01181	0.0471484	0.205063
ENSG00000090861	AARS1	0.671931	3.50324	1.78759	0.0771161	0.26865
ENSG00000090863	GLG1	0.0556415	4.13064	0.193667	0.846861	0.929801
ENSG00000090889	KIF4A	-0.0104121	-1.81683	-0.0238719	0.981006	0.990804
ENSG00000090905	TNRC6A	-0.491813	4.31088	-1.14194	0.256425	0.509717
ENSG00000090924	PLEKHG2	0.964998	3.29821	1.62896	0.106722	0.32021
ENSG00000090971	NAT14	0.973393	-0.467648	1.81053	0.0734605	0.261764
ENSG00000090975	PITPNM2	-0.340398	-0.937392	-0.829417	0.409004	0.652372
ENSG00000090989	EXOC1	0.0319088	4.21453	0.0807264	0.935834	0.972212
ENSG00000091009	RBM27	-0.916274	2.43432	-2.14753	0.0343652	0.171038
ENSG00000091039	OSBPL8	-1.00368	5.3236	-3.49535	0.000728866	0.0188072
ENSG00000091073	DTX2	0.233954	5.9974	0.710085	0.479437	0.707619
ENSG00000091106	NLRC4	-0.343089	-1.27022	-0.672912	0.50268	0.722357
ENSG00000091127	PUS7	-0.924485	-0.08331	-1.69099	0.0942057	0.298788
ENSG00000091129	NRCAM	-0.486837	-1.03553	-0.88795	0.37687	0.624335
ENSG00000091136	LAMB1	0.373347	2.17795	0.576225	0.565862	0.767597
ENSG00000091137	SLC26A4	1.02633	1.68009	1.48286	0.141511	0.372986
ENSG00000091140	DLD	-0.705595	4.75428	-2.01636	0.0466622	0.204235
ENSG00000091157	WDR7	-0.657078	3.79319	-1.6092	0.110979	0.327273
ENSG00000091164	TXNL1	-0.524694	4.76955	-2.19641	0.0305622	0.160208
ENSG00000091181	IL5RA	0.157297	4.19412	0.393526	0.694836	0.847715
ENSG00000091262	ABCC6	-0.271753	2.17801	-0.486736	0.627596	0.807226
ENSG00000091317	CMTM6	-0.27838	5.17374	-1.36372	0.175966	0.419548
ENSG00000091409	ITGA6	-0.677948	2.63491	-1.40577	0.163143	0.402969
ENSG00000091428	RAPGEF4	-0.15995	-1.58888	-0.361878	0.718269	0.861002
ENSG00000091436	MAP3K20	-0.842279	1.45161	-1.57918	0.117708	0.338188
ENSG00000091483	FH	-1.49575	1.9998	-2.91505	0.0044605	0.0527297
ENSG00000091490	SEL1L3	-0.0258259	4.90388	-0.076466	0.939213	0.974113
ENSG00000091513	TF	-0.247443	2.06082	-0.613694	0.540924	0.749627
ENSG00000091527	CDV3	0.208495	5.61982	1.05398	0.294638	0.548452
ENSG00000091536	MYO15A	-0.408663	-0.244091	-0.799913	0.425811	0.665415
ENSG00000091542	ALKBH5	-0.355767	4.29722	-1.56178	0.121755	0.344199
ENSG00000091592	NLRP1	0.262251	1.31384	0.502062	0.616817	0.79957
ENSG00000091622	PITPNM3	-0.336603	1.97945	-0.875899	0.383354	0.630079
ENSG00000091640	SPAG7	-0.096083	2.88337	-0.196918	0.844324	0.927764
ENSG00000091651	ORC6	-0.64258	3.5592	-1.78852	0.0769652	0.26852
ENSG00000091656	ZFHX4	-0.808745	0.793563	-1.43267	0.155322	0.392222
ENSG00000091664	SLC17A6	-0.814256	-1.63312	-1.44244	0.152555	0.388157
ENSG00000091732	ZC3HC1	0.460752	0.366461	0.754858	0.452251	0.685635
ENSG00000091831	ESR1	-0.251768	-0.757666	-0.427676	0.669881	0.832468
ENSG00000091844	RGS17	-0.821864	-0.205076	-1.75082	0.0832926	0.280314
ENSG00000091879	ANGPT2	-0.814184	-0.878124	-1.95923	0.0530962	0.218728
ENSG00000091947	TMEM101	0.599156	-0.0378714	1.10468	0.272163	0.52598
ENSG00000091972	CD200	0.043873	-0.865424	0.0843368	0.932971	0.971247
ENSG00000091986	CCDC80	-0.259897	3.96677	-0.800937	0.42522	0.664892
ENSG00000092010	PSME1	0.789976	6.0893	2.96099	0.00389592	0.0484286
ENSG00000092020	PPP2R3C	-0.345443	3.9604	-0.658098	0.512109	0.728747
ENSG00000092036	HAUS4	0.799102	2.37557	1.36579	0.175318	0.418937
ENSG00000092068	SLC7A8	-0.0386244	0.719192	-0.0762957	0.939349	0.974113
ENSG00000092094	OSGEP	-0.0355488	1.96175	-0.0668897	0.946814	0.976838
ENSG00000092096	SLC22A17	0.149912	-1.89616	0.343323	0.732134	0.86871
ENSG00000092098	RNF31	1.27441	4.03695	3.18324	0.00198412	0.0329587
ENSG00000092108	SCFD1	-0.491865	4.92501	-1.23173	0.221172	0.473703
ENSG00000092140	G2E3	-0.662395	3.33498	-1.29006	0.200244	0.448956
ENSG00000092148	HECTD1	-0.450233	6.41871	-1.94571	0.054725	0.222466
ENSG00000092199	HNRNPC	-0.0985513	7.65753	-0.642819	0.521932	0.735659
ENSG00000092200	RPGRIP1	-0.663882	1.70614	-1.08725	0.27975	0.534087
ENSG00000092201	SUPT16H	-0.212798	3.67599	-0.726788	0.469191	0.699584
ENSG00000092203	TOX4	-0.00290629	4.48227	-0.0111866	0.991099	0.996161
ENSG00000092208	GEMIN2	1.40595	1.32557	2.5	0.0141807	0.105586
ENSG00000092295	TGM1	0.760562	-0.764844	1.32562	0.188229	0.434152
ENSG00000092330	TINF2	1.00882	3.61057	2.1563	0.0336542	0.168962
ENSG00000092421	SEMA6A	0.812834	0.526236	1.45663	0.148605	0.382726
ENSG00000092439	TRPM7	-0.487651	4.02515	-1.56551	0.120877	0.342862
ENSG00000092445	TYRO3	-0.0995158	-0.284845	-0.18619	0.852703	0.932537
ENSG00000092470	WDR76	0.584312	0.299277	1.14841	0.253762	0.507727
ENSG00000092529	CAPN3	1.07628	1.25423	2.17172	0.032434	0.165105
ENSG00000092531	SNAP23	-0.483613	4.98546	-1.74565	0.0841911	0.281697
ENSG00000092621	PHGDH	0.146065	0.867123	0.234659	0.814992	0.913236
ENSG00000092758	COL9A3	0.305293	-1.91657	0.694556	0.489074	0.713818
ENSG00000092820	EZR	0.0076114	7.65732	0.0402833	0.967954	0.984866
ENSG00000092841	MYL6	0.597938	7.75874	2.97082	0.00378395	0.047715
ENSG00000092847	AGO1	-0.170253	2.16188	-0.545426	0.586773	0.780523
ENSG00000092850	TEKT2	1.17057	3.22835	2.17811	0.0319406	0.163595
ENSG00000092853	CLSPN	-0.714145	-0.93484	-1.69191	0.0940297	0.298782
ENSG00000092871	RFFL	0.618634	3.63622	1.66051	0.100198	0.309571
ENSG00000092929	UNC13D	1.92359	1.92302	3.05402	0.00294904	0.0418345
ENSG00000092931	MFSD11	-0.261116	3.05855	-0.553473	0.581275	0.777909
ENSG00000092964	DPYSL2	1.35749	1.68337	2.7683	0.00680724	0.0672264
ENSG00000092969	TGFB2	-1.4116	-0.470396	-2.94844	0.00404322	0.0493349
ENSG00000092978	GPATCH2	-1.26797	3.08864	-2.82042	0.00586815	0.06163
ENSG00000093000	NUP50	-0.2347	5.42417	-1.05652	0.293484	0.547252
ENSG00000093010	COMT	0.0102648	3.5958	0.021028	0.983269	0.992085
ENSG00000093072	ADA2	0.32842	3.54674	0.779433	0.437714	0.67437
ENSG00000093134	VNN3	-0.301196	6.00184	-0.765857	0.445711	0.680715
ENSG00000093144	ECHDC1	-0.0154556	4.8086	-0.0444299	0.964658	0.984064
ENSG00000093167	LRRFIP2	-0.360731	4.9337	-1.20129	0.232705	0.485727
ENSG00000093183	SEC22C	0.346657	2.28872	0.683755	0.495839	0.718019
ENSG00000093217	XYLB	-1.37903	-0.25041	-2.77725	0.00663669	0.0661283
ENSG00000094631	HDAC6	-0.138523	3.80492	-0.331254	0.741202	0.873314
ENSG00000094661	OR1I1	-1.0031	0.771576	-2.10708	0.0378169	0.180302
ENSG00000094755	GABRP	0.0703854	6.78029	0.317588	0.751513	0.879303
ENSG00000094804	CDC6	0.278652	-0.727217	0.465972	0.642331	0.815916
ENSG00000094841	UPRT	0.0291027	2.37408	0.0609183	0.951556	0.978627
ENSG00000094880	CDC23	-0.558227	1.80668	-1.05811	0.292761	0.546725
ENSG00000094914	AAAS	1.0238	0.701763	1.96171	0.0528022	0.217937
ENSG00000094916	CBX5	-0.248903	4.39993	-1.05907	0.292326	0.546276
ENSG00000094963	FMO2	-0.364273	3.70274	-0.698564	0.486577	0.712332
ENSG00000094975	SUCO	-0.402959	4.07071	-1.14719	0.254261	0.508131
ENSG00000095002	MSH2	-0.795547	1.94996	-1.73581	0.0859262	0.285126
ENSG00000095015	MAP3K1	-0.0994269	3.51732	-0.362064	0.71813	0.860905
ENSG00000095059	DHPS	-0.141122	2.94813	-0.271845	0.786347	0.895537
ENSG00000095066	HOOK2	2.36734	3.03767	4.54083	1.69e-05	0.00181439
ENSG00000095139	ARCN1	-0.167577	4.64753	-0.742095	0.45991	0.691842
ENSG00000095203	EPB41L4B	-1.07003	3.36736	-2.74067	0.00735879	0.0703963
ENSG00000095209	TMEM38B	-0.611975	0.557958	-0.969362	0.334892	0.586918
ENSG00000095261	PSMD5	-0.251627	2.84172	-0.541142	0.58971	0.782481
ENSG00000095303	PTGS1	0.37079	-1.78932	1.00042	0.319719	0.573374
ENSG00000095319	NUP188	-0.0165555	2.9907	-0.0367097	0.970796	0.98606
ENSG00000095321	CRAT	0.80021	0.58624	1.53971	0.127045	0.351791
ENSG00000095370	SH2D3C	0.900808	-0.235286	1.50058	0.13687	0.365134
ENSG00000095380	NANS	-0.0413914	4.37599	-0.137701	0.890776	0.951545
ENSG00000095383	TBC1D2	0.00225786	1.42667	0.00485423	0.996137	0.998071
ENSG00000095397	WHRN	0.7712	2.75393	1.57653	0.118318	0.339057
ENSG00000095464	PDE6C	-0.408654	-2.23817	-1.12031	0.26548	0.518959
ENSG00000095485	CWF19L1	-0.74669	2.05402	-1.32701	0.187772	0.433807
ENSG00000095539	SEMA4G	0.506363	-0.953261	1.02901	0.306157	0.560685
ENSG00000095564	BTAF1	0.087863	3.93307	0.290395	0.772164	0.88892
ENSG00000095574	IKZF5	0.210502	1.71888	0.421728	0.674202	0.835101
ENSG00000095585	BLNK	-0.025784	2.3653	-0.0442391	0.964809	0.984064
ENSG00000095587	TLL2	-0.387017	-1.65246	-0.918001	0.361006	0.611883
ENSG00000095596	CYP26A1	-1.89263	-1.24452	-3.64502	0.000441341	0.0137565
ENSG00000095627	TDRD1	-1.33219	-1.2673	-2.7968	0.00627793	0.064046
ENSG00000095637	SORBS1	1.10673	-0.35817	2.17103	0.032488	0.165183
ENSG00000095739	BAMBI	-1.07998	-0.348837	-2.40047	0.0183762	0.120516
ENSG00000095787	WAC	-0.403713	6.25044	-2.23788	0.0276286	0.151971
ENSG00000095794	CREM	-0.526751	5.58254	-1.41539	0.160312	0.399273
ENSG00000095906	NUBP2	0.792528	1.24955	1.50302	0.13624	0.364426
ENSG00000095951	HIVEP1	-0.330895	4.47882	-0.872921	0.384966	0.631249
ENSG00000095970	TREM2	-0.581437	-1.66219	-1.07402	0.285606	0.539627
ENSG00000096006	CRISP3	-0.912206	-1.30219	-1.30371	0.195568	0.444138
ENSG00000096060	FKBP5	-0.442753	3.02705	-1.08225	0.281953	0.535768
ENSG00000096063	SRPK1	-0.463149	4.9431	-1.6809	0.0961556	0.301831
ENSG00000096070	BRPF3	-0.207471	2.42437	-0.537314	0.592341	0.784025
ENSG00000096080	MRPS18A	0.185027	2.28544	0.336484	0.737268	0.871712
ENSG00000096092	TMEM14A	-0.788336	1.99324	-1.3106	0.193237	0.441158
ENSG00000096093	EFHC1	0.0276983	6.68527	0.104862	0.916713	0.96433
ENSG00000096384	HSP90AB1	0.199018	6.88473	1.22735	0.222805	0.47546
ENSG00000096401	CDC5L	-0.536686	2.70278	-1.95376	0.0537503	0.22027
ENSG00000096433	ITPR3	1.42427	1.89813	4.37769	3.15e-05	0.00279457
ENSG00000096654	ZNF184	-0.423127	-0.92492	-0.992304	0.323638	0.576971
ENSG00000096696	DSP	-0.127069	4.81059	-0.550864	0.583055	0.778525
ENSG00000096717	SIRT1	-0.267041	2.67255	-0.551587	0.582561	0.778525
ENSG00000096746	HNRNPH3	-0.125736	5.15171	-0.555829	0.57967	0.776333
ENSG00000096872	IFT74	-0.361934	4.21012	-0.946569	0.346324	0.598026
ENSG00000096968	JAK2	0.956088	3.94333	2.50444	0.0140153	0.104824
ENSG00000096996	IL12RB1	1.36762	-0.670949	2.88118	0.0049241	0.0557022
ENSG00000097007	ABL1	0.319022	2.56065	0.786999	0.433294	0.671061
ENSG00000097021	ACOT7	-0.164134	0.0823984	-0.295076	0.768597	0.887643
ENSG00000097033	SH3GLB1	-0.183568	4.99971	-0.73562	0.463823	0.69575
ENSG00000097046	CDC7	-0.766169	-0.994219	-1.59284	0.114607	0.333283
ENSG00000097096	SYDE2	-0.518673	-0.195164	-1.02557	0.307767	0.562114
ENSG00000099139	PCSK5	-0.562464	4.43734	-1.34386	0.182281	0.427577
ENSG00000099194	SCD	-0.448481	1.32373	-1.03317	0.304219	0.55831
ENSG00000099203	TMED1	-0.196279	0.70856	-0.311094	0.756429	0.881257
ENSG00000099204	ABLIM1	-0.46543	6.11611	-1.95324	0.0538134	0.220348
ENSG00000099219	ERMP1	-1.10855	2.64279	-3.10336	0.00253821	0.0382473
ENSG00000099246	RAB18	-0.201928	5.27763	-0.68172	0.497119	0.718964
ENSG00000099250	NRP1	0.282468	1.87323	0.519592	0.604589	0.792624
ENSG00000099256	PRTFDC1	-0.504088	-2.08846	-1.23522	0.219877	0.472248
ENSG00000099260	PALMD	0.0378712	2.17081	0.0840433	0.933204	0.971247
ENSG00000099282	TSPAN15	0.339131	2.85197	0.705555	0.482238	0.709416
ENSG00000099284	MACROH2A2	-0.102568	-1.31717	-0.2323	0.816818	0.91405
ENSG00000099290	WASHC2A	0.0495259	3.74194	0.148966	0.881905	0.947034
ENSG00000099308	MAST3	1.08778	0.987718	2.23684	0.0276991	0.152126
ENSG00000099326	MZF1	0.687536	1.4434	1.39724	0.165685	0.406598
ENSG00000099330	OCEL1	-0.43261	1.19168	-0.759262	0.449626	0.683676
ENSG00000099331	MYO9B	1.13561	4.18065	2.66039	0.00920062	0.0809982
ENSG00000099337	KCNK6	-0.47006	1.63057	-0.956703	0.34121	0.592788
ENSG00000099338	CATSPERG	0.324975	-0.151828	0.604292	0.547129	0.753296
ENSG00000099341	PSMD8	-0.137963	3.87233	-0.362468	0.717829	0.860729
ENSG00000099364	FBXL19	1.27512	0.268693	2.17369	0.0322815	0.164664
ENSG00000099377	HSD3B7	0.557862	-0.93441	1.22657	0.223097	0.47546
ENSG00000099381	SETD1A	0.692987	0.313227	1.40983	0.161944	0.401306
ENSG00000099385	BCL7C	-0.597477	1.70323	-1.24283	0.217071	0.468973
ENSG00000099617	EFNA2	-1.09914	-1.16983	-2.36017	0.0203673	0.127771
ENSG00000099622	CIRBP	0.523594	6.14817	2.06681	0.0415466	0.190908
ENSG00000099624	ATP5F1D	0.18921	2.8672	0.316679	0.752201	0.879556
ENSG00000099725	PRKY	0.460552	0.379218	0.621589	0.535741	0.745712
ENSG00000099783	HNRNPM	0.37173	5.99193	1.64027	0.104346	0.316573
ENSG00000099785	MARCHF2	0.363983	2.40655	0.717484	0.474883	0.704371
ENSG00000099795	NDUFB7	-0.309278	2.89375	-0.587644	0.558203	0.761468
ENSG00000099797	TECR	-0.159211	4.63097	-0.507717	0.61286	0.797085
ENSG00000099800	TIMM13	-1.01403	0.562232	-1.77583	0.0790493	0.272844
ENSG00000099804	CDC34	1.35493	1.54119	2.30638	0.0233226	0.137419
ENSG00000099810	MTAP	0.339986	4.10638	0.859575	0.392245	0.63718
ENSG00000099812	MISP	1.33863	2.85567	3.20193	0.00187192	0.0317741
ENSG00000099814	CEP170B	0.831751	1.57174	1.92866	0.0568392	0.227691
ENSG00000099817	POLR2E	0.924548	3.49391	2.06175	0.0420365	0.192273
ENSG00000099821	POLRMT	1.40161	0.342409	2.79453	0.00631875	0.0643309
ENSG00000099834	CDHR5	0.6654	-1.54875	1.49531	0.138236	0.367467
ENSG00000099840	IZUMO4	0.336015	-1.35041	0.686051	0.494397	0.717536
ENSG00000099849	RASSF7	-0.148513	1.24487	-0.274482	0.784326	0.894818
ENSG00000099860	GADD45B	0.430147	4.29409	0.87222	0.385346	0.631299
ENSG00000099864	PALM	1.56838	-0.881488	3.37858	0.0010678	0.0231584
ENSG00000099875	MKNK2	1.00189	4.97731	2.84119	0.00552832	0.0593679
ENSG00000099889	ARVCF	1.53417	0.033971	2.89539	0.00472441	0.0544307
ENSG00000099899	TRMT2A	1.63378	1.48906	2.89931	0.00467078	0.0541883
ENSG00000099901	RANBP1	0.419852	3.82442	0.889053	0.376281	0.624147
ENSG00000099904	ZDHHC8	1.7405	0.478453	3.01045	0.00336218	0.044847
ENSG00000099910	KLHL22	0.00937762	1.67116	0.0148887	0.988153	0.994398
ENSG00000099917	MED15	0.824823	4.71218	2.46231	0.0156563	0.110917
ENSG00000099937	SERPIND1	0.494138	-2.18896	1.39978	0.164923	0.405959
ENSG00000099940	SNAP29	-0.270891	2.29056	-0.626768	0.532355	0.743142
ENSG00000099942	CRKL	-0.0873384	2.52151	-0.273015	0.78545	0.895486
ENSG00000099949	LZTR1	1.31495	2.57274	2.61578	0.010396	0.086726
ENSG00000099954	CECR2	-0.231785	-1.56316	-0.466353	0.642059	0.815779
ENSG00000099956	SMARCB1	-0.146168	3.72858	-0.408777	0.683648	0.840278
ENSG00000099957	P2RX6	0.202109	-2.01677	0.546982	0.585708	0.780005
ENSG00000099958	DERL3	0.180891	-1.4737	0.43325	0.665841	0.830112
ENSG00000099960	SLC7A4	0.00190467	-2.25225	0.00550364	0.995621	0.997814
ENSG00000099968	BCL2L13	0.329655	4.12116	1.12686	0.262717	0.516021
ENSG00000099974	DDTL	-0.934684	-1.07863	-1.65519	0.101275	0.311461
ENSG00000099977	DDT	0.775737	2.08818	1.12446	0.263726	0.517087
ENSG00000099985	OSM	0.929791	1.82889	1.12017	0.26554	0.518959
ENSG00000099991	CABIN1	1.51466	3.74977	3.67363	0.000400382	0.0131119
ENSG00000099992	TBC1D10A	0.956273	1.56543	1.71106	0.0904218	0.292722
ENSG00000099995	SF3A1	0.186047	4.91228	0.671773	0.503402	0.72247
ENSG00000099998	GGT5	-0.401466	-0.855996	-0.781749	0.436358	0.673043
ENSG00000099999	RNF215	-0.571947	0.545206	-1.12944	0.261633	0.514931
ENSG00000100003	SEC14L2	0.985134	2.12109	1.44572	0.151635	0.386643
ENSG00000100012	SEC14L3	-0.952211	2.16344	-1.54793	0.125054	0.349238
ENSG00000100014	SPECC1L	-0.393314	3.5427	-1.26271	0.209866	0.460729
ENSG00000100023	PPIL2	0.64854	2.88028	1.44934	0.150625	0.385276
ENSG00000100024	UPB1	0.144156	-1.12824	0.275345	0.783665	0.894473
ENSG00000100027	YPEL1	-0.305532	-1.079	-0.614304	0.540522	0.749442
ENSG00000100028	SNRPD3	-0.250024	4.00627	-0.546599	0.58597	0.780006
ENSG00000100029	PES1	1.04911	2.95788	2.15652	0.0336361	0.168962
ENSG00000100030	MAPK1	-0.0976388	4.67522	-0.39028	0.697227	0.849036
ENSG00000100031	GGT1	0.615325	-0.902266	1.09787	0.275113	0.529017
ENSG00000100033	PRODH	0.265445	1.45127	0.457479	0.648399	0.819445
ENSG00000100034	PPM1F	0.0927478	1.07059	0.167844	0.867072	0.938565
ENSG00000100036	SLC35E4	0.843149	-1.47189	2.19542	0.0306354	0.160535
ENSG00000100038	TOP3B	1.12428	0.549198	2.13329	0.0355472	0.174754
ENSG00000100055	CYTH4	0.91779	3.32387	1.27106	0.206893	0.457163
ENSG00000100056	ESS2	1.26369	0.0138397	2.69759	0.00830048	0.0756721
ENSG00000100060	MFNG	2.23729	-0.720431	4.01857	0.00011919	0.00668088
ENSG00000100065	CARD10	0.287029	2.01822	0.471714	0.638242	0.813546
ENSG00000100068	LRP5L	0.835254	-0.933551	1.68842	0.0946997	0.299256
ENSG00000100075	SLC25A1	0.958445	1.19978	1.69378	0.0936723	0.298008
ENSG00000100077	GRK3	-0.0154121	1.67554	-0.0325239	0.974124	0.987661
ENSG00000100079	LGALS2	0.621127	-0.309645	0.87628	0.383148	0.629854
ENSG00000100083	GGA1	1.01041	4.29584	2.95144	0.00400756	0.0490811
ENSG00000100084	HIRA	0.929443	1.67391	1.60069	0.112855	0.330236
ENSG00000100092	SH3BP1	1.91133	2.03806	3.96397	0.000145036	0.00758658
ENSG00000100097	LGALS1	0.782194	3.96304	1.11839	0.266294	0.519535
ENSG00000100099	HPS4	0.00913871	2.84895	0.022723	0.98192	0.991192
ENSG00000100100	PIK3IP1	0.316809	3.84771	0.81935	0.414693	0.656473
ENSG00000100104	SRRD	-0.774271	0.545332	-1.39493	0.166377	0.407451
ENSG00000100105	PATZ1	1.17771	1.63287	2.76269	0.00691594	0.067742
ENSG00000100106	TRIOBP	0.469543	3.24643	1.58973	0.115307	0.334279
ENSG00000100109	TFIP11	0.51073	3.02097	1.05129	0.295863	0.549979
ENSG00000100116	GCAT	-0.178397	-0.34829	-0.31612	0.752624	0.879828
ENSG00000100121	GGTLC2	0.342718	-1.59111	0.558748	0.577684	0.775287
ENSG00000100124	ANKRD54	0.340834	2.80299	0.784291	0.434873	0.671868
ENSG00000100129	EIF3L	-0.774582	5.79968	-2.88377	0.00488718	0.0554865
ENSG00000100138	SNU13	-0.495062	4.76881	-1.30616	0.194737	0.443308
ENSG00000100139	MICALL1	1.73819	2.14613	3.87701	0.000197581	0.0088533
ENSG00000100142	POLR2F	-1.07099	2.72991	-1.90961	0.0592819	0.232742
ENSG00000100147	CCDC134	0.740789	-0.0519618	1.39854	0.165294	0.406273
ENSG00000100150	DEPDC5	-0.0726264	3.03433	-0.150119	0.880997	0.946655
ENSG00000100151	PICK1	1.84241	1.19655	3.50692	0.000701467	0.0183856
ENSG00000100154	TTC28	-0.250093	0.57821	-0.473708	0.636824	0.812646
ENSG00000100156	SLC16A8	0.613702	-1.96375	1.70365	0.0918026	0.2953
ENSG00000100162	CENPM	-0.479828	1.14966	-0.711003	0.478871	0.707202
ENSG00000100167	SEPTIN3	-0.356032	-1.77002	-0.798076	0.42687	0.666306
ENSG00000100170	SLC5A1	-0.176881	-1.05342	-0.367054	0.714417	0.858732
ENSG00000100196	KDELR3	-1.97724	0.890776	-3.42882	0.000906946	0.021044
ENSG00000100197	CYP2D6	1.51168	-0.608299	3.24276	0.00164702	0.029698
ENSG00000100201	DDX17	0.297049	6.8935	1.8008	0.0749923	0.264638
ENSG00000100206	DMC1	-1.43692	-1.1817	-3.01819	0.00328508	0.0442524
ENSG00000100207	TCF20	0.614632	2.88059	2.04265	0.0439322	0.196744
ENSG00000100209	HSCB	1.2822	0.337647	1.95497	0.0536048	0.219915
ENSG00000100211	CBY1	-0.348384	4.04591	-0.892402	0.374493	0.622809
ENSG00000100216	TOMM22	-0.184695	3.52875	-0.478745	0.63325	0.810918
ENSG00000100218	RSPH14	-1.67123	1.08905	-2.63802	0.00978362	0.0835263
ENSG00000100219	XBP1	0.470514	6.44805	2.64332	0.00964247	0.0828887
ENSG00000100220	RTCB	1.29759	3.51809	2.88432	0.00487941	0.0554865
ENSG00000100221	JOSD1	0.039924	3.47987	0.0877302	0.930281	0.970215
ENSG00000100225	FBXO7	0.106718	4.89909	0.415289	0.678892	0.837756
ENSG00000100226	GTPBP1	0.946341	5.21224	2.53069	0.0130726	0.0998189
ENSG00000100227	POLDIP3	0.792728	3.47485	1.98169	0.0504818	0.21282
ENSG00000100228	RAB36	0.105279	3.25957	0.228566	0.819711	0.91578
ENSG00000100234	TIMP3	0.366002	-1.28629	0.845069	0.400253	0.644867
ENSG00000100239	PPP6R2	0.93395	3.29759	3.10701	0.00251005	0.0380976
ENSG00000100241	SBF1	1.03912	3.10754	2.74169	0.00733781	0.0703058
ENSG00000100242	SUN2	0.680806	5.24293	1.69624	0.093204	0.297145
ENSG00000100243	CYB5R3	0.801805	3.35471	2.38324	0.0192054	0.123625
ENSG00000100246	DNAL4	-0.428264	1.50603	-0.875248	0.383706	0.63031
ENSG00000100258	LMF2	2.37983	1.27675	4.68664	9.53e-06	0.00126197
ENSG00000100263	RHBDD3	1.36675	-0.717568	2.84607	0.00545104	0.0591161
ENSG00000100266	PACSIN2	0.0398626	4.50458	0.115903	0.90798	0.96007
ENSG00000100271	TTLL1	-0.625896	-0.218035	-1.2516	0.21387	0.46523
ENSG00000100280	AP1B1	0.569617	3.60822	1.59886	0.113261	0.330785
ENSG00000100281	HMGXB4	-0.62546	2.25539	-1.37693	0.171857	0.414539
ENSG00000100284	TOM1	-0.130311	4.87484	-0.359713	0.719882	0.861857
ENSG00000100288	CHKB	1.19577	2.90024	2.22978	0.0281817	0.153593
ENSG00000100290	BIK	0.067369	0.98965	0.118279	0.906103	0.95917
ENSG00000100292	HMOX1	1.65691	2.2984	2.94085	0.00413481	0.0501878
ENSG00000100294	MCAT	-0.643896	0.343524	-1.17985	0.241085	0.494914
ENSG00000100296	THOC5	-0.075077	2.5678	-0.1544	0.877631	0.944393
ENSG00000100297	MCM5	0.88436	2.21768	1.63313	0.105841	0.318715
ENSG00000100298	APOBEC3H	0.39486	-1.99178	0.888066	0.376808	0.624335
ENSG00000100299	ARSA	-0.218806	1.78384	-0.481412	0.63136	0.809678
ENSG00000100300	TSPO	1.08818	3.81649	2.08568	0.0397608	0.185997
ENSG00000100304	TTLL12	0.160386	0.699727	0.305622	0.760579	0.883572
ENSG00000100307	CBX7	0.678533	0.557587	1.43066	0.155898	0.392877
ENSG00000100316	RPL3	0.223455	7.9706	0.93444	0.352509	0.604521
ENSG00000100319	ZMAT5	0.0749412	0.333776	0.146228	0.88406	0.948293
ENSG00000100320	RBFOX2	-0.141441	3.01513	-0.343093	0.732307	0.86871
ENSG00000100321	SYNGR1	-0.288951	-0.26246	-0.530306	0.59717	0.787909
ENSG00000100324	TAB1	1.05509	1.03	2.04346	0.0438506	0.196701
ENSG00000100325	ASCC2	-0.332067	4.75389	-0.847557	0.398872	0.643821
ENSG00000100330	MTMR3	-0.373425	4.37408	-1.27472	0.205601	0.455109
ENSG00000100335	MIEF1	0.559588	1.3327	1.14755	0.254112	0.507952
ENSG00000100336	APOL4	0.916064	3.17479	1.88804	0.0621549	0.237923
ENSG00000100342	APOL1	1.86889	4.0507	3.78907	0.000268932	0.0104832
ENSG00000100345	MYH9	0.764671	6.51695	2.68301	0.00864322	0.0777371
ENSG00000100347	SAMM50	0.527105	1.60292	1.01	0.31513	0.569388
ENSG00000100348	TXN2	0.32473	2.71631	0.73672	0.463157	0.695316
ENSG00000100350	FOXRED2	-0.520015	-1.44241	-1.4121	0.161274	0.400736
ENSG00000100351	GRAP2	1.82324	-0.565929	3.51539	0.000682044	0.0180999
ENSG00000100353	EIF3D	-0.10926	5.07994	-0.397951	0.691583	0.8454
ENSG00000100354	TNRC6B	0.44194	4.57072	1.54186	0.126522	0.351499
ENSG00000100359	SGSM3	1.10754	4.35433	3.15419	0.00217111	0.0347546
ENSG00000100360	IFT27	0.24748	3.66355	0.523862	0.601627	0.790774
ENSG00000100364	KIAA0930	0.921713	2.88884	2.30387	0.0234693	0.137904
ENSG00000100365	NCF4	1.4192	0.540349	2.03782	0.0444234	0.198164
ENSG00000100368	CSF2RB	0.561725	1.89716	0.792469	0.430115	0.668651
ENSG00000100372	SLC25A17	0.55255	1.05458	0.906466	0.367044	0.617212
ENSG00000100376	FAM118A	0.534174	3.27377	0.929997	0.354793	0.606907
ENSG00000100379	KCTD17	1.87438	-0.311124	3.39593	0.00100943	0.0222838
[truncated: 12,967 more rows]
