# Supplementary material for: Upper airway gene expression reveals a more robust innate and adaptive immune response to SARS-CoV-2 in children compared with older adults
Source: medRxiv preprint, doi:10.1101/2021.07.15.21260285, version 1 (2021-07-19)
Supplement: Supplementary Data 3 [file 260285_file05.xlsx]

## Sheet: Supplementary_Data_3_covid_pedi
	gene	logFC	AveExpr	t	P.Value	adj.P.Val	B
ENSG00000000003	TSPAN6	-0.817612	4.61904	-3.006	0.00342955	0.019905	-2.26063
ENSG00000000005	TNMD	0.635128	-1.68493	2.37858	0.0194927	0.0690103	-3.66555
ENSG00000000419	DPM1	-0.394997	4.32894	-1.22074	0.225372	0.390137	-5.74884
ENSG00000000457	SCYL3	-0.234316	2.6025	-0.894007	0.373702	0.548841	-5.91615
ENSG00000000460	C1orf112	0.504744	1.2738	1.59755	0.113648	0.243953	-5.03625
ENSG00000000938	FGR	0.448138	2.13049	0.846793	0.399355	0.57438	-5.94671
ENSG00000000971	CFH	-0.424556	4.7288	-1.51243	0.133926	0.273216	-5.40946
ENSG00000001036	FUCA2	-0.452137	3.3124	-1.43314	0.155282	0.301476	-5.37648
ENSG00000001084	GCLC	-1.27812	6.52733	-6.30987	1.03e-08	3.54e-06	9.65662
ENSG00000001167	NFYA	0.137403	2.38482	0.465356	0.6428	0.77387	-6.19422
ENSG00000001460	STPG1	-1.39461	3.58441	-4.95935	3.31e-06	0.000152164	4.26468
ENSG00000001461	NIPAL3	-0.551493	3.43215	-2.44713	0.0163409	0.0609146	-3.53553
ENSG00000001497	LAS1L	0.0564479	2.20603	0.214167	0.830901	0.904342	-6.26334
ENSG00000001561	ENPP4	-0.959897	3.6706	-3.15362	0.00219164	0.0143559	-1.76503
ENSG00000001617	SEMA3F	0.127019	3.45147	0.379376	0.705302	0.819521	-6.32558
ENSG00000001626	CFTR	-1.64946	4.05487	-3.49707	0.000732689	0.00644028	-0.799679
ENSG00000001629	ANKIB1	-0.281226	4.92513	-1.43953	0.153469	0.29931	-5.53654
ENSG00000001630	CYP51A1	-0.0579954	3.28077	-0.19358	0.846941	0.914758	-6.34598
ENSG00000001631	KRIT1	-0.342761	4.73011	-1.22296	0.224535	0.389017	-5.79299
ENSG00000002016	RAD52	0.299846	2.85575	0.948501	0.345413	0.521106	-5.90382
ENSG00000002330	BAD	-0.324762	3.74764	-0.954497	0.342387	0.517636	-5.97019
ENSG00000002549	LAP3	-0.204617	6.95482	-1.08094	0.282609	0.455652	-6.20237
ENSG00000002586	CD99	0.0529503	5.22033	0.241157	0.809982	0.891752	-6.5556
ENSG00000002587	HS3ST1	0.563552	3.16676	1.61672	0.109437	0.237778	-5.10775
ENSG00000002726	AOC1	0.659707	-1.32301	2.33145	0.0219616	0.0749302	-3.74959
ENSG00000002746	HECW1	0.32116	-1.15468	0.989516	0.325062	0.501097	-5.85053
ENSG00000002822	MAD1L1	-0.11275	3.745	-0.378344	0.706066	0.820118	-6.34104
ENSG00000002834	LASP1	-0.379355	5.42026	-2.80908	0.00609309	0.0299847	-2.85628
ENSG00000002919	SNX11	0.433958	4.04586	1.29538	0.1985	0.357466	-5.62595
ENSG00000002933	TMEM176A	0.342492	1.38188	0.738788	0.461957	0.630577	-5.99592
ENSG00000003056	M6PR	0.209044	4.70343	1.2183	0.226294	0.39128	-5.79506
ENSG00000003096	KLHL13	0.541247	-0.308943	1.83375	0.0699946	0.173789	-4.66721
ENSG00000003147	ICA1	-0.248989	4.32455	-1.0488	0.297078	0.471637	-5.93981
ENSG00000003249	DBNDD1	0.371391	-0.201947	1.26587	0.208825	0.370139	-5.49775
ENSG00000003393	ALS2	-0.40607	3.85726	-1.46375	0.146744	0.289812	-5.3823
ENSG00000003400	CASP10	-0.529955	3.87424	-2.07419	0.040917	0.117844	-4.35311
ENSG00000003402	CFLAR	-0.17894	7.21624	-1.06245	0.290875	0.464595	-6.24425
ENSG00000003436	TFPI	-0.186093	4.01936	-0.853627	0.395577	0.570646	-6.08818
ENSG00000003509	NDUFAF7	-0.289372	1.3362	-0.729734	0.467447	0.635532	-5.98229
ENSG00000003756	RBM5	-0.752778	6.4582	-3.70026	0.000370387	0.00396288	-0.379012
ENSG00000003987	MTMR7	-0.204172	1.08681	-0.534372	0.594401	0.738707	-6.10132
ENSG00000003989	SLC7A2	-0.890406	2.85655	-2.42914	0.0171208	0.0628926	-3.51726
ENSG00000004059	ARF5	-0.0138012	4.73012	-0.045196	0.964051	0.980585	-6.52612
ENSG00000004139	SARM1	-0.320803	1.59153	-1.00738	0.316451	0.492734	-5.76082
ENSG00000004142	POLDIP2	0.562761	3.38447	2.63346	0.00994765	0.0424732	-3.10215
ENSG00000004399	PLXND1	0.399863	1.87808	0.987401	0.326092	0.502071	-5.80255
ENSG00000004455	AK2	0.229738	5.6687	1.41629	0.16014	0.307818	-5.65011
ENSG00000004468	CD38	-0.411361	4.73189	-1.48845	0.140127	0.281111	-5.44586
ENSG00000004478	FKBP4	-0.259517	3.92402	-0.951396	0.34395	0.519377	-5.98774
ENSG00000004487	KDM1A	0.460102	3.56301	1.93901	0.0556314	0.14772	-4.59176
ENSG00000004534	RBM6	-0.336328	5.15883	-1.37913	0.171271	0.323081	-5.64735
ENSG00000004660	CAMKK1	0.649741	-0.233098	1.99022	0.0496	0.135499	-4.38532
ENSG00000004700	RECQL	0.156319	2.37815	0.445803	0.65681	0.784975	-6.20155
ENSG00000004766	VPS50	-0.466148	4.43093	-1.51947	0.132147	0.270731	-5.36424
ENSG00000004777	ARHGAP33	-0.339207	1.95174	-0.728698	0.468077	0.635989	-6.00071
ENSG00000004779	NDUFAB1	-0.40898	4.41597	-1.15551	0.250939	0.419049	-5.83962
ENSG00000004799	PDK4	-0.287823	1.36471	-0.791594	0.430678	0.601804	-5.93556
ENSG00000004809	SLC22A16	0.0298414	0.206666	0.0703126	0.944101	0.969903	-6.25461
ENSG00000004838	ZMYND10	-0.778449	5.64494	-2.96486	0.00387546	0.0217021	-2.46992
ENSG00000004846	ABCB5	0.0565074	-0.259264	0.17617	0.860556	0.922706	-6.26456
ENSG00000004848	ARX	-0.128864	-0.473921	-0.321667	0.74845	0.850792	-6.23597
ENSG00000004864	SLC25A13	0.110044	3.9253	0.391868	0.696081	0.813747	-6.36053
ENSG00000004866	ST7	-0.929974	2.56302	-2.22814	0.0283621	0.0902766	-3.93014
ENSG00000004897	CDC27	-0.262682	4.69939	-1.10648	0.271467	0.442649	-5.92072
ENSG00000004939	SLC4A1	-0.294187	0.340261	-0.716364	0.475621	0.642227	-6.00173
ENSG00000004961	HCCS	0.309194	2.40285	0.927184	0.35631	0.531675	-5.87736
ENSG00000004975	DVL2	0.00669159	3.69101	0.0250854	0.980042	0.989803	-6.40656
ENSG00000005001	PRSS22	-0.0736188	4.9378	-0.215265	0.830047	0.903593	-6.53237
ENSG00000005007	UPF1	-0.148421	5.27581	-0.659677	0.511145	0.672484	-6.37714
ENSG00000005020	SKAP2	0.817132	2.69807	1.76689	0.0806353	0.19161	-4.82879
ENSG00000005022	SLC25A5	0.108894	6.36088	0.653706	0.514967	0.675881	-6.50206
ENSG00000005059	MCUB	0.89251	3.16453	2.5574	0.0122183	0.0493157	-3.26783
ENSG00000005075	POLR2J	-1.14281	3.1488	-3.90198	0.000183765	0.00241228	0.538952
ENSG00000005100	DHX33	-0.0194741	1.08352	-0.0496109	0.960542	0.978032	-6.24746
ENSG00000005108	THSD7A	0.864975	-1.10449	3.13419	0.00232659	0.0150239	-1.76118
ENSG00000005156	LIG3	-0.492034	4.36612	-2.1199	0.0367654	0.109086	-4.31945
ENSG00000005175	RPAP3	-0.666943	4.05172	-2.78085	0.00660216	0.0315857	-2.79091
ENSG00000005187	ACSM3	-1.42906	3.84826	-3.56562	0.00058365	0.00551441	-0.573468
ENSG00000005189	REXO5	-0.802598	1.94106	-1.77535	0.0792184	0.189385	-4.73968
ENSG00000005194	CIAPIN1	0.0597251	2.93132	0.159849	0.873358	0.93005	-6.31502
ENSG00000005206	SPPL2B	-0.554327	4.69151	-1.62143	0.108422	0.236398	-5.24137
ENSG00000005238	FAM214B	0.549392	1.56966	1.64995	0.102437	0.227081	-4.96436
ENSG00000005243	COPZ2	-0.331336	0.27549	-0.751319	0.45442	0.62408	-5.97901
ENSG00000005249	PRKAR2B	0.0761102	3.07084	0.222822	0.824179	0.900252	-6.32682
ENSG00000005302	MSL3	-0.0627104	4.73061	-0.26258	0.793474	0.880493	-6.49245
ENSG00000005339	CREBBP	-0.714828	6.00756	-2.63028	0.0100342	0.0426709	-3.36057
ENSG00000005379	TSPOAP1	-0.896041	3.82935	-3.30676	0.00135694	0.0101304	-1.34571
ENSG00000005436	GCFC2	-0.0741563	2.94451	-0.216876	0.828795	0.902723	-6.3193
ENSG00000005448	WDR54	-0.733424	4.37624	-2.22743	0.0284111	0.0903622	-4.10217
ENSG00000005469	CROT	-0.647839	3.12111	-2.25605	0.0264887	0.085892	-3.91365
ENSG00000005471	ABCB4	-0.00824545	-0.624555	-0.0242307	0.980722	0.990018	-6.29623
ENSG00000005483	KMT2E	-0.526626	6.069	-3.21971	0.00178529	0.0123398	-1.80287
ENSG00000005486	RHBDD2	-1.18601	5.58042	-4.64996	1.13e-05	0.000341527	2.98349
ENSG00000005700	IBTK	-0.00151489	4.36303	-0.0106963	0.991489	0.995435	-6.48565
ENSG00000005801	ZNF195	-0.121889	3.52319	-0.434181	0.665195	0.791162	-6.30337
ENSG00000005810	MYCBP2	0.170129	4.71419	0.762924	0.447503	0.617514	-6.23636
ENSG00000005812	FBXL3	0.264123	4.10174	1.52867	0.129853	0.267457	-5.3161
ENSG00000005844	ITGAL	0.443606	3.45576	1.04054	0.300876	0.475924	-5.85383
ENSG00000005882	PDK2	-0.880391	2.31348	-2.32142	0.0225216	0.0763064	-3.71451
ENSG00000005884	ITGA3	-0.269804	3.88762	-0.93929	0.350095	0.52527	-5.99558
ENSG00000005889	ZFX	-0.551669	4.37229	-2.0353	0.0447609	0.12588	-4.48759
ENSG00000005893	LAMP2	0.117335	4.57823	0.640767	0.523301	0.682505	-6.30898
ENSG00000005961	ITGA2B	0.0492637	-1.07201	0.14754	0.883036	0.93563	-6.31449
ENSG00000005981	ASB4	-0.235751	1.38028	-0.648142	0.518542	0.679026	-6.04126
ENSG00000006007	GDE1	-0.405306	5.36196	-2.33728	0.021642	0.0741695	-3.97225
ENSG00000006015	REX1BD	0.299231	2.84988	0.975148	0.332099	0.507627	-5.87183
ENSG00000006016	CRLF1	-0.0619284	0.757208	-0.14384	0.885948	0.937384	-6.2288
ENSG00000006025	OSBPL7	-0.385179	1.86775	-1.23186	0.221207	0.384959	-5.51908
ENSG00000006042	TMEM98	-0.47071	2.88672	-1.33472	0.185334	0.341364	-5.45527
ENSG00000006047	YBX2	0.265712	-0.448372	0.795806	0.428238	0.599466	-5.9765
ENSG00000006062	MAP3K14	0.133932	1.79079	0.387418	0.699361	0.815333	-6.1883
ENSG00000006071	ABCC8	0.34163	-1.131	1.38533	0.169374	0.320868	-5.39668
ENSG00000006118	TMEM132A	0.636876	1.66768	1.56108	0.122013	0.255816	-5.10952
ENSG00000006125	AP2B1	-0.113277	5.5908	-0.646296	0.519732	0.679687	-6.42172
ENSG00000006194	ZNF263	-0.0930556	2.40961	-0.289598	0.772789	0.866938	-6.25107
ENSG00000006210	CX3CL1	0.0549721	3.27839	0.159655	0.873511	0.93005	-6.34908
ENSG00000006282	SPATA20	0.157553	3.34297	0.554315	0.580737	0.727846	-6.24239
ENSG00000006283	CACNA1G	1.26718	-0.529392	4.40899	2.87e-05	0.000653597	2.27916
ENSG00000006327	TNFRSF12A	0.528925	1.53831	1.21041	0.229288	0.394601	-5.55659
ENSG00000006377	DLX6	1.86812	-0.59622	5.8466	7.94e-08	1.2e-05	7.78091
ENSG00000006432	MAP3K9	1.1519	1.23595	4.31332	4.11e-05	0.000850022	1.94499
ENSG00000006451	RALA	0.392451	3.67779	1.6591	0.100574	0.224278	-5.07565
ENSG00000006453	BAIAP2L1	-0.717009	5.40361	-3.14067	0.00228079	0.0147922	-1.96426
ENSG00000006459	KDM7A	0.20903	4.07329	1.26839	0.20793	0.369417	-5.66264
ENSG00000006468	ETV1	0.43655	-0.189194	1.15386	0.251611	0.419728	-5.62718
ENSG00000006530	AGK	-0.660656	4.63728	-2.47871	0.0150489	0.0573761	-3.57891
ENSG00000006534	ALDH3B1	-1.28287	5.64936	-5.64579	1.89e-07	2.05e-05	6.88996
ENSG00000006555	TTC22	0.219399	1.8292	0.711177	0.478813	0.64505	-6.02581
ENSG00000006576	PHTF2	-0.371931	2.74764	-1.08675	0.280048	0.452546	-5.74018
ENSG00000006606	CCL26	0.72015	-1.55483	2.44139	0.0165863	0.0616193	-3.51861
ENSG00000006607	FARP2	-0.238266	5.04877	-0.77973	0.437595	0.608256	-6.26476
ENSG00000006611	USH1C	0.168796	2.16878	0.367081	0.71442	0.825397	-6.22079
ENSG00000006625	GGCT	-0.278983	2.28318	-0.706231	0.481868	0.647942	-6.03927
ENSG00000006634	DBF4	0.15683	2.35229	0.404183	0.687037	0.807488	-6.21361
ENSG00000006652	IFRD1	-0.214336	5.57939	-0.74524	0.458068	0.627306	-6.35264
ENSG00000006659	LGALS14	0.225668	-0.778203	0.701874	0.484568	0.650559	-6.06576
ENSG00000006695	COX10	-0.0758076	2.37728	-0.310529	0.756877	0.855863	-6.24985
ENSG00000006704	GTF2IRD1	0.245675	3.09658	0.902335	0.369286	0.544898	-5.95564
ENSG00000006712	PAF1	0.133157	4.17329	0.644855	0.520661	0.680285	-6.25669
ENSG00000006715	VPS41	-0.329383	4.48114	-1.32742	0.187724	0.344413	-5.63564
ENSG00000006740	ARHGAP44	0.164038	2.55087	0.510906	0.610668	0.750669	-6.18353
ENSG00000006744	ELAC2	-0.2527	4.32963	-0.896104	0.372587	0.547875	-6.08378
ENSG00000006747	SCIN	-0.702746	4.7362	-2.54837	0.0125168	0.0500956	-3.42604
ENSG00000006756	ARSD	-0.728376	3.02868	-2.65181	0.00946057	0.0409209	-3.01828
ENSG00000006757	PNPLA4	-0.736985	2.51409	-2.47725	0.0151064	0.0575419	-3.38999
ENSG00000006831	ADIPOR2	-1.06364	3.66326	-3.65261	0.000435596	0.00447811	-0.289475
ENSG00000006837	CDKL3	-1.13837	2.0472	-2.91966	0.00442668	0.0238523	-2.28731
ENSG00000007001	UPP2	0.200852	-0.62369	0.670778	0.504079	0.666928	-6.07819
ENSG00000007038	PRSS21	-0.110209	-1.09189	-0.402492	0.688276	0.80827	-6.24899
ENSG00000007047	MARK4	-0.428562	3.38397	-1.46454	0.146528	0.289526	-5.32837
ENSG00000007062	PROM1	-0.925091	6.60185	-2.7692	0.00682344	0.0322917	-3.07355
ENSG00000007080	CCDC124	-0.21699	3.26494	-0.61332	0.541211	0.69651	-6.17818
ENSG00000007129	CEACAM21	-0.426045	-0.371594	-0.942181	0.348621	0.52406	-5.8496
ENSG00000007168	PAFAH1B1	-0.763533	5.7566	-5.59201	2.38e-07	2.41e-05	6.66171
ENSG00000007171	NOS2	0.647699	4.21829	1.72743	0.0875182	0.202665	-5.02333
ENSG00000007174	DNAH9	-1.14904	5.40403	-3.74071	0.000322413	0.00359011	-0.157331
ENSG00000007202	KIAA0100	0.0725731	5.05542	0.410953	0.682083	0.80376	-6.48239
ENSG00000007216	SLC13A2	1.24968	-0.744064	4.39341	3.04e-05	0.000681983	2.22091
ENSG00000007237	AC005747.1	-0.361391	3.57759	-1.30046	0.196762	0.355193	-5.56989
ENSG00000007255	TRAPPC6A	-1.10304	1.98738	-2.68013	0.00875094	0.0386777	-2.88001
ENSG00000007264	MATK	0.334607	1.04366	0.989035	0.325296	0.501317	-5.7743
ENSG00000007306	CEACAM7	0.780597	-0.682235	2.13485	0.0354892	0.106144	-4.12332
ENSG00000007312	CD79B	1.62043	-0.581478	2.93486	0.00423371	0.0230779	-2.27839
ENSG00000007341	ST7L	-0.807779	3.21421	-2.46965	0.01541	0.0583326	-3.45291
ENSG00000007350	TKTL1	0.836814	-1.5424	2.3794	0.0194516	0.0689083	-3.65277
ENSG00000007372	PAX6	0.520464	2.62474	1.46614	0.146094	0.288947	-5.29753
ENSG00000007376	RPUSD1	0.0366249	0.969128	0.101184	0.919629	0.95491	-6.24086
ENSG00000007384	RHBDF1	1.14065	2.01839	3.02487	0.00324137	0.0190692	-2.05018
ENSG00000007392	LUC7L	0.0838518	4.15802	0.315435	0.753161	0.85378	-6.40868
ENSG00000007402	CACNA2D2	0.691793	-0.96978	2.50227	0.0141454	0.0547459	-3.35312
ENSG00000007516	BAIAP3	-0.648946	4.8422	-1.88152	0.0631319	0.161516	-4.82236
ENSG00000007520	TSR3	0.167406	2.07735	0.527616	0.599064	0.74216	-6.13252
ENSG00000007541	PIGQ	-1.03237	3.63402	-3.36314	0.00113315	0.00890557	-1.16299
ENSG00000007545	CRAMP1	0.143053	2.64953	0.443726	0.658305	0.786303	-6.21431
ENSG00000007866	TEAD3	0.131222	2.31945	0.486223	0.62799	0.763814	-6.17679
ENSG00000007923	DNAJC11	-0.288758	3.78629	-1.0895	0.278842	0.450998	-5.83672
ENSG00000007933	FMO3	-1.46824	5.19128	-4.37397	3.27e-05	0.000717327	2.00778
ENSG00000007944	MYLIP	0.134756	3.91484	0.688027	0.493204	0.65806	-6.19968
ENSG00000007952	NOX1	0.748536	-1.19214	3.01301	0.00335856	0.0196039	-2.09582
ENSG00000007968	E2F2	0.696917	-1.13802	2.94392	0.00412241	0.022614	-2.2765
ENSG00000008018	PSMB1	-0.482745	5.65671	-2.66268	0.00918231	0.0400447	-3.24688
ENSG00000008083	JARID2	0.873999	2.59585	3.4639	0.000817064	0.00694737	-0.827299
ENSG00000008086	CDKL5	-0.811424	3.30754	-3.5048	0.000714219	0.00630497	-0.71844
ENSG00000008118	CAMK1G	0.588716	-0.579325	1.26709	0.208392	0.369839	-5.51244
ENSG00000008128	CDK11A	-0.270114	3.66094	-0.817528	0.415785	0.58826	-6.08017
ENSG00000008130	NADK	-0.213066	5.76962	-0.850811	0.397131	0.572235	-6.29002
ENSG00000008226	DLEC1	-1.08487	5.23402	-3.54149	0.000632489	0.00581507	-0.768659
ENSG00000008256	CYTH3	0.212168	1.40052	0.544594	0.587379	0.733251	-6.11054
ENSG00000008277	ADAM22	0.320309	-0.362799	0.965085	0.337087	0.51279	-5.82578
ENSG00000008282	SYPL1	-0.130129	5.01321	-0.583253	0.561181	0.712974	-6.39324
ENSG00000008283	CYB561	-0.75575	4.51811	-3.18219	0.00200645	0.0134987	-1.76274
ENSG00000008294	SPAG9	0.302704	5.54907	1.54147	0.12671	0.262676	-5.45805
ENSG00000008300	CELSR3	1.09647	-0.991661	3.98842	0.000135145	0.00193451	0.837194
ENSG00000008311	AASS	0.485503	0.71626	1.65717	0.100966	0.224823	-4.94155
ENSG00000008323	PLEKHG6	-0.591899	3.56079	-1.54056	0.126931	0.263003	-5.23539
ENSG00000008324	SS18L2	0.161606	2.86037	0.438291	0.662225	0.788975	-6.22829
ENSG00000008382	MPND	-0.920693	1.53906	-2.52542	0.0133052	0.0524468	-3.24051
ENSG00000008394	MGST1	-0.607804	5.50762	-1.59227	0.114829	0.245781	-5.37983
ENSG00000008405	CRY1	0.477614	2.57075	1.56445	0.121221	0.254732	-5.1324
ENSG00000008438	PGLYRP1	0.267934	-1.13855	0.765972	0.445696	0.615553	-6.04024
ENSG00000008441	NFIX	-0.444184	4.07747	-1.54498	0.12586	0.261376	-5.28687
ENSG00000008513	ST3GAL1	-0.553258	3.47156	-1.78669	0.0773524	0.186223	-4.83663
ENSG00000008516	MMP25	0.253219	2.06773	0.506608	0.613668	0.752286	-6.16055
ENSG00000008517	IL32	0.0649721	3.75827	0.12854	0.898009	0.943812	-6.40181
ENSG00000008710	PKD1	-0.41649	5.15327	-1.48186	0.14187	0.283426	-5.50341
ENSG00000008735	MAPK8IP2	1.15655	-1.22416	4.21603	5.9e-05	0.00107707	1.59715
ENSG00000008838	MED24	-0.325086	5.27055	-1.27937	0.204052	0.364463	-5.78682
ENSG00000008853	RHOBTB2	-0.470433	2.82514	-1.3687	0.174497	0.327348	-5.40222
ENSG00000008869	HEATR5B	-1.07108	4.603	-4.2014	6.23e-05	0.00112135	1.44359
ENSG00000008952	SEC62	-0.43866	5.56318	-2.29247	0.0242088	0.0804443	-4.08909
ENSG00000008988	RPS20	0.326786	8.66504	2.17234	0.0324566	0.099617	-4.63934
ENSG00000009307	CSDE1	0.365472	7.02794	2.80097	0.00623559	0.0304334	-3.02914
ENSG00000009335	UBE3C	-0.567866	4.37513	-2.82701	0.00578878	0.0289474	-2.70629
ENSG00000009413	REV3L	-1.14349	4.96793	-5.1468	1.54e-06	8.58e-05	4.91878
ENSG00000009709	PAX7	-0.349786	1.67967	-0.976445	0.33146	0.507099	-5.7952
ENSG00000009724	MASP2	0.116477	-0.698492	0.480738	0.631869	0.765995	-6.18621
ENSG00000009765	IYD	0.369949	-0.314714	1.24799	0.215271	0.377985	-5.52652
ENSG00000009780	FAM76A	0.0494417	3.66106	0.19456	0.846176	0.914368	-6.38847
ENSG00000009790	TRAF3IP3	0.342868	3.64978	0.958798	0.340228	0.515798	-5.95218
ENSG00000009830	POMT2	-1.2558	3.98536	-3.48447	0.000763724	0.00663433	-0.830609
ENSG00000009844	VTA1	-0.272512	3.78288	-0.865467	0.389083	0.563757	-6.04688
ENSG00000009950	MLXIPL	0.936924	-0.974156	3.25559	0.00159535	0.0114266	-1.4168
ENSG00000009954	BAZ1B	0.376161	3.66195	2.28797	0.0244809	0.0811513	-3.90274
ENSG00000010017	RANBP9	0.158735	4.24005	0.883405	0.37937	0.554336	-6.08973
ENSG00000010030	ETV7	-0.512346	2.6449	-1.4243	0.157816	0.304853	-5.32579
ENSG00000010072	SPRTN	-0.45987	1.88319	-1.46268	0.147038	0.290184	-5.22053
ENSG00000010165	EEF1AKNMT	0.291277	2.72014	0.949295	0.345012	0.520692	-5.88619
ENSG00000010219	DYRK4	-0.315477	2.58945	-0.749713	0.455382	0.624974	-6.02369
ENSG00000010244	ZNF207	0.0686971	6.5686	0.388976	0.698213	0.814964	-6.66032
ENSG00000010256	UQCRC1	-0.180694	5.03245	-0.692852	0.490186	0.655045	-6.32798
ENSG00000010270	STARD3NL	-0.219036	3.28707	-0.790124	0.431531	0.602843	-6.05743
ENSG00000010278	CD9	-0.0959366	6.59486	-0.435819	0.664011	0.790414	-6.64598
ENSG00000010282	HHATL	-1.38667	0.829374	-3.02203	0.00326905	0.0191907	-2.0098
ENSG00000010292	NCAPD2	0.14007	3.52584	0.463815	0.643899	0.775047	-6.28649
ENSG00000010295	IFFO1	1.02229	0.543169	3.22497	0.0017562	0.01221	-1.47523
ENSG00000010310	GIPR	-1.21028	3.63334	-3.05307	0.00297792	0.0179513	-2.0374
ENSG00000010318	PHF7	-1.03765	2.37893	-2.57618	0.011618	0.0475682	-3.15895
ENSG00000010322	NISCH	-0.40905	4.29476	-1.54729	0.1253	0.260611	-5.31043
ENSG00000010327	STAB1	0.778393	0.713166	2.02687	0.0456338	0.127684	-4.30614
ENSG00000010361	FUZ	-0.499149	3.96072	-1.64755	0.102931	0.227751	-5.11671
ENSG00000010379	SLC6A13	-2.40846	0.559809	-5.4893	3.69e-07	3.12e-05	6.3374
ENSG00000010404	IDS	-0.482674	5.59588	-3.16814	0.00209559	0.0139057	-1.90594
ENSG00000010438	PRSS3	-0.206627	-0.987484	-0.565902	0.572868	0.72162	-6.16452
ENSG00000010539	ZNF200	-0.157472	2.44826	-0.437941	0.662478	0.789111	-6.20114
ENSG00000010610	CD4	0.00999887	3.42628	0.0307879	0.975507	0.987122	-6.37571
ENSG00000010626	LRRC23	-1.02295	6.28577	-4.46459	2.32e-05	0.0005609	2.24977
ENSG00000010671	BTK	0.556435	1.64674	1.1052	0.272016	0.443412	-5.68081
ENSG00000010704	HFE	0.394659	0.61589	1.06283	0.2907	0.464496	-5.70441
ENSG00000010803	SCMH1	0.274629	3.68271	1.07706	0.28433	0.457572	-5.84548
ENSG00000010810	FYN	-0.0991523	4.10248	-0.227761	0.820348	0.898176	-6.42431
ENSG00000010818	HIVEP2	-0.216429	3.49809	-0.747229	0.456872	0.626382	-6.10879
ENSG00000010932	FMO1	0.138356	-0.226736	0.388199	0.698785	0.815067	-6.20185
ENSG00000011007	ELOA	0.370298	3.28431	1.90907	0.0594378	0.154525	-4.61685
ENSG00000011009	LYPLA2	-0.923699	4.41392	-3.33022	0.00125922	0.00957079	-1.32675
ENSG00000011021	CLCN6	-0.273183	2.76722	-0.778079	0.438562	0.609226	-6.02161
ENSG00000011028	MRC2	0.247873	-0.343258	0.784027	0.435082	0.605842	-5.97949
ENSG00000011105	TSPAN9	0.10861	0.706301	0.30664	0.759825	0.858132	-6.20419
ENSG00000011114	BTBD7	-0.517383	3.2891	-2.54364	0.0126757	0.0505919	-3.29806
ENSG00000011132	APBA3	-0.227117	1.57546	-0.660338	0.510723	0.672139	-6.03166
ENSG00000011143	MKS1	-0.904885	3.71993	-2.61905	0.0103461	0.0436799	-3.15609
ENSG00000011198	ABHD5	-0.243742	4.06168	-0.901601	0.369674	0.545073	-6.0507
ENSG00000011201	ANOS1	0.979799	0.405407	2.85456	0.00534821	0.0273105	-2.47104
ENSG00000011243	AKAP8L	-0.26832	5.18015	-1.35542	0.178673	0.33283	-5.67996
ENSG00000011258	MBTD1	0.339687	2.45546	1.33149	0.186389	0.34273	-5.46455
ENSG00000011260	UTP18	-0.178425	3.27956	-0.590906	0.556064	0.709219	-6.18817
ENSG00000011275	RNF216	-0.575374	3.5848	-2.37484	0.019679	0.0694588	-3.7047
ENSG00000011295	TTC19	-0.233724	3.82968	-0.802748	0.424234	0.595591	-6.11273
ENSG00000011304	PTBP1	0.0276463	6.13924	0.171938	0.863872	0.924764	-6.67473
ENSG00000011332	DPF1	0.157735	-0.581193	0.511073	0.61055	0.750581	-6.16529
ENSG00000011347	SYT7	0.675602	0.519816	1.81403	0.0730036	0.17861	-4.68538
ENSG00000011376	LARS2	-0.530644	2.1846	-1.89194	0.0617129	0.158829	-4.56486
ENSG00000011405	PIK3C2A	0.142598	3.77426	0.620515	0.536486	0.692706	-6.23275
ENSG00000011422	PLAUR	-0.114229	5.17465	-0.235268	0.814535	0.894874	-6.55105
ENSG00000011426	ANLN	1.30355	1.41165	3.29184	0.00142276	0.0105118	-1.30739
ENSG00000011451	WIZ	0.410002	1.58918	1.38071	0.170785	0.322535	-5.3455
ENSG00000011454	RABGAP1	-0.109535	5.01281	-0.462461	0.644867	0.775959	-6.45639
ENSG00000011465	DCN	0.498211	1.64724	1.19809	0.234026	0.399759	-5.58072
ENSG00000011478	QPCTL	0.272751	0.39246	0.822354	0.413048	0.586158	-5.92859
ENSG00000011485	PPP5C	-0.666321	3.91705	-2.58657	0.0112973	0.046671	-3.25225
ENSG00000011523	CEP68	-0.153222	2.57192	-0.627111	0.532173	0.689417	-6.1176
ENSG00000011566	MAP4K3	-0.844676	4.37835	-2.49975	0.0142395	0.055071	-3.50182
ENSG00000011590	ZBTB32	0.0795865	0.519016	0.18104	0.856743	0.920255	-6.23249
ENSG00000011600	TYROBP	-0.898336	5.17223	-2.11367	0.0373092	0.11024	-4.41706
ENSG00000011638	TMEM159	0.684629	3.44208	2.76866	0.00683379	0.0323299	-2.77837
ENSG00000012048	BRCA1	-0.0215301	2.72491	-0.0652084	0.948153	0.9724	-6.3183
ENSG00000012061	ERCC1	-0.839048	4.59109	-3.3833	0.00106192	0.00847981	-1.18819
ENSG00000012124	CD22	2.024	1.83892	3.66074	0.000423735	0.0043794	-0.229641
ENSG00000012171	SEMA3B	0.140219	0.611118	0.342296	0.732926	0.83855	-6.19532
ENSG00000012174	MBTPS2	0.629333	0.749496	2.52166	0.0134385	0.0528328	-3.26607
ENSG00000012211	PRICKLE3	0.536246	1.75075	1.55289	0.123957	0.258504	-5.12113
ENSG00000012223	LTF	2.69855	1.60718	5.0961	1.9e-06	0.000100468	4.79031
ENSG00000012232	EXTL3	-0.350953	2.69157	-1.03725	0.302397	0.47742	-5.78437
ENSG00000012504	NR1H4	0.530136	-1.56894	2.28495	0.0246646	0.0816282	-3.86299
ENSG00000012660	ELOVL5	-0.0947969	5.4181	-0.667031	0.506458	0.668519	-6.3897
ENSG00000012779	ALOX5	0.752497	2.92932	1.42922	0.156402	0.303159	-5.35191
ENSG00000012817	KDM5D	1.60284	0.928645	3.05518	0.00295898	0.0179023	-1.96544
ENSG00000012822	CALCOCO1	-0.120267	4.92083	-0.707778	0.480911	0.647109	-6.30386
ENSG00000012963	UBR7	-0.163808	2.61788	-0.47405	0.636612	0.7693	-6.19279
ENSG00000012983	MAP4K5	-0.0623322	4.3928	-0.360436	0.719366	0.828828	-6.42726
ENSG00000013016	EHD3	1.30577	-0.297337	4.44531	2.5e-05	0.000588938	2.40951
ENSG00000013275	PSMC4	0.138432	4.28668	0.793201	0.429746	0.600867	-6.16339
ENSG00000013288	MAN2B2	0.0847391	2.06518	0.375597	0.7081	0.82155	-6.21199
ENSG00000013293	SLC7A14	-0.793511	0.34984	-2.05024	0.043249	0.122792	-4.25686
ENSG00000013297	CLDN11	0.226577	0.248757	0.600201	0.54988	0.704289	-6.08081
ENSG00000013306	SLC25A39	0.266059	4.47403	1.10929	0.270257	0.441553	-5.89453
ENSG00000013364	MVP	-0.486805	5.87274	-3.27001	0.00152447	0.0110786	-1.63937
ENSG00000013374	NUB1	-0.263795	6.04867	-1.30521	0.195148	0.353331	-5.84215
ENSG00000013375	PGM3	-0.529018	4.00381	-1.72622	0.0877375	0.203086	-4.99615
ENSG00000013392	RWDD2A	0.475474	-0.199688	1.58496	0.116481	0.248346	-5.06364
ENSG00000013441	CLK1	0.114267	5.6294	0.557726	0.578415	0.72604	-6.47783
ENSG00000013503	POLR3B	0.319255	1.4798	0.990523	0.324573	0.500596	-5.79873
ENSG00000013523	ANGEL1	0.188919	0.936242	0.560386	0.576608	0.724603	-6.09665
ENSG00000013561	RNF14	0.449213	4.198	1.78494	0.0776385	0.186719	-4.91964
ENSG00000013563	DNASE1L1	-0.235347	2.06689	-0.729154	0.4678	0.635802	-6.00362
ENSG00000013573	DDX11	0.907609	4.00742	2.66787	0.00905206	0.0396136	-3.07638
ENSG00000013583	HEBP1	-0.198801	2.61925	-0.517078	0.60637	0.747683	-6.17913
ENSG00000013588	GPRC5A	0.97235	3.84197	3.58702	0.000543338	0.00525729	-0.511827
ENSG00000013619	MAMLD1	0.635866	-0.810282	1.9303	0.0567166	0.149705	-4.5171
ENSG00000013725	CD6	-0.340981	4.95396	-1.13705	0.258536	0.427557	-5.91857
ENSG00000013810	TACC3	0.723014	2.46936	1.7812	0.0782521	0.187782	-4.80557
ENSG00000014123	UFL1	0.393287	3.07931	1.48926	0.139913	0.280818	-5.28025
ENSG00000014138	POLA2	0.0874853	2.90127	0.266318	0.790603	0.879017	-6.30191
ENSG00000014164	ZC3H3	0.242395	2.07934	0.792798	0.429979	0.601135	-5.98145
ENSG00000014216	CAPN1	-0.278341	6.36904	-1.54875	0.12495	0.260145	-5.53619
ENSG00000014257	ACPP	0.0305251	0.750015	0.0928871	0.9262	0.959485	-6.24149
ENSG00000014824	SLC30A9	0.248541	4.40129	1.40696	0.162882	0.311847	-5.5211
ENSG00000014914	MTMR11	0.144773	0.446581	0.398419	0.691264	0.810271	-6.17442
ENSG00000014919	COX15	-0.182963	3.31427	-0.877029	0.382805	0.557568	-5.99782
ENSG00000015133	CCDC88C	-0.724216	5.76908	-3.64338	0.000449414	0.00458129	-0.499198
ENSG00000015153	YAF2	0.046405	3.69309	0.144712	0.885262	0.937201	-6.39563
ENSG00000015171	ZMYND11	0.142462	4.12176	0.609076	0.544007	0.698751	-6.27307
ENSG00000015285	WAS	-0.17873	3.22425	-0.380306	0.704614	0.819212	-6.28032
ENSG00000015475	BID	0.251286	3.78917	0.738489	0.462138	0.630719	-6.15391
ENSG00000015479	MATR3	-0.0888597	6.13634	-0.537379	0.592331	0.737357	-6.54602
ENSG00000015532	XYLT2	-0.382915	2.07235	-1.55962	0.122358	0.256377	-5.09563
ENSG00000015568	RGPD5	-1.20904	4.69078	-2.85165	0.0053933	0.027498	-2.67472
ENSG00000015592	STMN4	0.870441	-1.09801	3.0292	0.0031996	0.0188912	-2.04871
ENSG00000015676	NUDCD3	0.117658	4.09018	0.462272	0.645001	0.775969	-6.34513
ENSG00000016082	ISL1	0.828766	0.302922	2.4321	0.0169904	0.0626238	-3.47084
ENSG00000016391	CHDH	0.604793	-0.657388	2.79369	0.00636611	0.030847	-2.64246
ENSG00000016402	IL20RA	-1.38737	2.33294	-4.12542	8.24e-05	0.00136869	1.3144
ENSG00000016602	CLCA4	1.09836	1.30637	2.54349	0.0126808	0.0505938	-3.23987
ENSG00000016864	GLT8D1	-0.737118	4.54523	-2.41636	0.0176944	0.0643226	-3.71131
ENSG00000017260	ATP2C1	0.0516847	5.28258	0.279501	0.780501	0.872353	-6.55404
ENSG00000017427	IGF1	0.554881	1.043	1.66058	0.100277	0.223774	-4.93534
ENSG00000017483	SLC38A5	0.60934	0.488905	1.42918	0.156413	0.303159	-5.29168
ENSG00000017797	RALBP1	0.0860296	4.12193	0.565086	0.57342	0.72187	-6.30113
ENSG00000018189	RUFY3	-0.669737	4.69044	-2.42202	0.0174383	0.0636768	-3.71263
ENSG00000018236	CNTN1	0.266054	-1.28189	0.784432	0.434846	0.605591	-6.03448
ENSG00000018280	SLC11A1	-0.752456	3.21856	-1.53135	0.129188	0.266433	-5.21231
ENSG00000018408	WWTR1	-0.118566	4.38965	-0.46824	0.640744	0.7722	-6.37754
ENSG00000018510	AGPS	0.196629	3.39431	0.911844	0.364286	0.540031	-5.97451
ENSG00000018610	CXorf56	-0.282096	2.86724	-0.926177	0.35683	0.532042	-5.89776
ENSG00000018699	TTC27	-0.619949	2.31957	-1.60162	0.112743	0.242711	-5.03433
ENSG00000018869	ZNF582	-0.0991927	-0.178626	-0.2833	0.777597	0.870337	-6.22953
ENSG00000019102	VSIG2	0.194152	2.52962	0.479932	0.632439	0.766408	-6.21325
ENSG00000019144	PHLDB1	-0.987989	1.50236	-2.90456	0.00462642	0.0246052	-2.32669
ENSG00000019186	CYP24A1	-0.710314	2.62703	-1.49317	0.138887	0.279342	-5.21576
ENSG00000019485	PRDM11	0.796189	1.44896	2.72756	0.00767042	0.0350924	-2.78986
ENSG00000019549	SNAI2	0.714797	-1.20822	2.28638	0.0245775	0.0813892	-3.84056
ENSG00000019582	CD74	-0.348995	9.40348	-1.82574	0.0712048	0.175587	-5.3683
ENSG00000019991	HGF	0.107019	-0.995956	0.361826	0.71833	0.827972	-6.25443
ENSG00000019995	ZRANB1	0.349242	2.37223	1.3884	0.168442	0.31947	-5.38019
ENSG00000020129	NCDN	0.460873	2.37775	1.41883	0.159402	0.307012	-5.32613
ENSG00000020181	ADGRA2	0.846741	-0.916405	2.24607	0.0271459	0.0874063	-3.90711
ENSG00000020256	ZFP64	-0.504365	2.64853	-1.72836	0.0873509	0.20242	-4.85933
ENSG00000020426	MNAT1	-0.68503	4.49991	-2.04946	0.0433263	0.12299	-4.47082
ENSG00000020577	SAMD4A	0.803777	2.74647	2.5408	0.012772	0.0508714	-3.28336
ENSG00000020633	RUNX3	0.72709	3.14713	2.10909	0.0377126	0.111053	-4.23063
ENSG00000020922	MRE11	-0.396737	3.10453	-1.46624	0.146067	0.288929	-5.30399
ENSG00000021300	PLEKHB1	-0.741522	3.94763	-2.4377	0.0167459	0.0619175	-3.59872
ENSG00000021355	SERPINB1	0.0377699	6.20302	0.175173	0.861337	0.923135	-6.68116
ENSG00000021461	CYP3A43	0.132634	-0.616891	0.43213	0.66668	0.792383	-6.20219
ENSG00000021488	SLC7A9	-0.0378576	-0.846168	-0.134469	0.893332	0.941711	-6.30169
ENSG00000021574	SPAST	-0.0575453	3.82271	-0.278443	0.781311	0.872918	-6.3896
ENSG00000021645	NRXN3	0.671245	-0.22324	2.04162	0.0441152	0.124497	-4.28608
ENSG00000021762	OSBPL5	0.300653	3.29941	0.996557	0.32165	0.497896	-5.89153
ENSG00000021776	AQR	-0.286761	3.37571	-1.21995	0.225669	0.390486	-5.64649
ENSG00000021826	CPS1	0.374454	-0.659343	1.37444	0.172717	0.325136	-5.38301
ENSG00000022267	FHL1	-0.200294	0.202748	-0.453782	0.651077	0.780627	-6.15957
ENSG00000022277	RTF2	0.420353	4.62711	2.41523	0.0177462	0.0644679	-3.71877
ENSG00000022556	NLRP2	-0.218613	2.12815	-0.508299	0.612487	0.75206	-6.15251
ENSG00000022567	SLC45A4	-0.386109	3.99364	-1.55404	0.123684	0.258154	-5.27007
ENSG00000022840	RNF10	0.0831013	6.39892	0.569213	0.570629	0.719958	-6.55624
ENSG00000022976	ZNF839	-0.302702	2.46921	-0.942677	0.348369	0.523932	-5.87024
ENSG00000023041	ZDHHC6	-0.781392	3.40769	-2.26546	0.0258822	0.0845319	-3.92029
ENSG00000023171	GRAMD1B	0.146764	3.23855	0.477703	0.634019	0.767737	-6.25454
ENSG00000023191	RNH1	-0.0723966	4.88285	-0.441461	0.659937	0.787393	-6.44904
ENSG00000023228	NDUFS1	0.149117	4.49151	0.829538	0.408994	0.582673	-6.16211
ENSG00000023287	RB1CC1	-0.134357	4.55172	-0.842153	0.401934	0.576773	-6.16018
ENSG00000023318	ERP44	0.209723	2.74277	0.893219	0.374121	0.549213	-5.93409
ENSG00000023330	ALAS1	0.234506	4.36899	1.17084	0.244753	0.411948	-5.81084
ENSG00000023445	BIRC3	0.444159	3.99782	1.83671	0.0695519	0.172952	-4.80654
ENSG00000023516	AKAP11	0.353369	3.3273	2.07784	0.040571	0.117115	-4.30603
ENSG00000023572	GLRX2	0.305398	1.94875	0.829215	0.409176	0.582698	-5.9426
ENSG00000023608	SNAPC1	-0.556194	2.1676	-1.71838	0.0891635	0.205488	-4.8452
ENSG00000023697	DERA	-0.619862	3.2811	-1.69025	0.0944388	0.214511	-4.98079
ENSG00000023734	STRAP	0.338153	4.68298	1.50816	0.135014	0.274616	-5.41102
ENSG00000023839	ABCC2	-1.38004	1.00457	-3.56738	0.000580235	0.00549481	-0.45739
ENSG00000023892	DEF6	-0.395342	2.90292	-1.21631	0.227047	0.39221	-5.60155
ENSG00000023902	PLEKHO1	0.983041	3.29022	3.06539	0.00286914	0.0174887	-1.99375
ENSG00000023909	GCLM	-0.556354	4.9234	-2.54176	0.0127394	0.050778	-3.46271
ENSG00000024048	UBR2	-0.0673362	3.87869	-0.416822	0.677801	0.801084	-6.34331
ENSG00000024422	EHD2	0.892966	0.649412	2.41231	0.0178802	0.0648112	-3.51617
ENSG00000024526	DEPDC1	1.10799	-0.652089	3.33414	0.00124353	0.00950186	-1.18098
ENSG00000024862	CCDC28A	-0.0176251	3.46846	-0.0605719	0.951834	0.974018	-6.37885
ENSG00000025039	RRAGD	0.315256	3.20421	1.10064	0.273987	0.445341	-5.77159
ENSG00000025156	HSF2	-0.310657	2.72429	-0.888631	0.376569	0.55157	-5.92548
ENSG00000025293	PHF20	0.214032	4.74668	0.995828	0.322002	0.498253	-6.03957
ENSG00000025434	NR1H3	-0.335742	3.23339	-0.88618	0.377881	0.552851	-5.96825
ENSG00000025708	TYMP	-0.586947	7.00801	-2.60283	0.0108117	0.0451345	-3.52692
ENSG00000025770	NCAPH2	0.14165	3.19233	0.518314	0.605511	0.747323	-6.22276
ENSG00000025772	TOMM34	-0.519318	3.21342	-1.93418	0.056231	0.148974	-4.553
ENSG00000025796	SEC63	-0.405343	5.02777	-1.7616	0.081531	0.193092	-5.05276
ENSG00000025800	KPNA6	-0.162344	3.70123	-0.881719	0.380276	0.555216	-6.02531
ENSG00000026025	VIM	0.340084	5.69081	1.31708	0.191153	0.348444	-5.7838
ENSG00000026036	RTEL1-TNFRSF6B	0.455887	-0.315728	2.18925	0.0311648	0.0967381	-3.99967
ENSG00000026103	FAS	-0.133213	4.17544	-0.456291	0.64928	0.779269	-6.35648
ENSG00000026297	RNASET2	-0.0652881	4.72098	-0.225951	0.821752	0.899097	-6.50265
ENSG00000026508	CD44	0.415765	6.9707	1.73204	0.0866903	0.201344	-5.30389
ENSG00000026559	KCNG1	1.39088	-1.1268	4.45635	2.39e-05	0.000573734	2.43743
ENSG00000026652	AGPAT4	0.396454	1.18947	1.06547	0.289513	0.463233	-5.70199
ENSG00000026751	SLAMF7	0.799084	3.04807	2.01555	0.0468286	0.130117	-4.41453
ENSG00000026950	BTN3A1	-0.400527	4.47481	-1.49176	0.139257	0.279914	-5.40981
ENSG00000027001	MIPEP	-0.929458	4.19939	-2.65827	0.00929425	0.0403612	-3.10771
ENSG00000027075	PRKCH	-0.595032	5.95472	-2.1807	0.031812	0.0981528	-4.3665
ENSG00000027697	IFNGR1	0.204126	4.87446	1.00442	0.317867	0.494279	-6.04858
ENSG00000027847	B4GALT7	-0.405953	2.30204	-1.15382	0.251627	0.419728	-5.63417
ENSG00000027869	SH2D2A	1.07961	1.00234	2.43736	0.0167604	0.0619431	-3.47017
ENSG00000028116	VRK2	0.24914	4.46599	1.57214	0.119426	0.252388	-5.28853
ENSG00000028137	TNFRSF1B	-0.341011	3.31093	-0.691927	0.490764	0.655444	-6.124
ENSG00000028203	VEZT	-0.323798	4.78139	-1.58265	0.117009	0.24892	-5.31282
ENSG00000028277	POU2F2	0.715979	1.94773	1.69077	0.0943392	0.214374	-4.91382
ENSG00000028310	BRD9	0.274164	4.07538	0.898963	0.37107	0.546542	-6.05704
ENSG00000028528	SNX1	-0.652555	5.22259	-3.47773	0.000780834	0.00672007	-0.962871
ENSG00000028839	TBPL1	-0.834035	4.25896	-2.4082	0.01807	0.0652989	-3.6951
ENSG00000029153	ARNTL2	0.28652	3.8257	1.09489	0.276486	0.448028	-5.83366
ENSG00000029363	BCLAF1	-0.507685	6.17229	-3.40192	0.000999874	0.00813086	-1.27774
ENSG00000029364	SLC39A9	-0.161441	4.12562	-0.871061	0.386037	0.560682	-6.08217
ENSG00000029534	ANK1	0.797514	-0.910127	2.82394	0.00583992	0.0291676	-2.57415
ENSG00000029559	IBSP	0.619622	-1.74635	2.55705	0.0122296	0.0493456	-3.26491
ENSG00000029639	TFB1M	-0.78039	2.45984	-1.86988	0.0647502	0.164274	-4.61348
ENSG00000029725	RABEP1	-0.1524	4.49326	-0.743379	0.459188	0.628209	-6.22724
ENSG00000029993	HMGB3	-0.631205	3.7224	-1.66681	0.0990266	0.221769	-5.06732
ENSG00000030066	NUP160	-0.580752	4.46523	-2.58086	0.0114726	0.0471857	-3.32139
ENSG00000030110	BAK1	0.0934357	2.23925	0.281951	0.778628	0.870794	-6.2411
ENSG00000030304	MUSK	0.342188	-1.10778	1.25441	0.212939	0.375188	-5.56163
ENSG00000030419	IKZF2	-0.155373	5.26377	-0.875519	0.383621	0.558357	-6.21398
ENSG00000030582	GRN	-0.29533	5.81974	-1.26709	0.208391	0.369839	-5.86343
ENSG00000031003	FAM13B	-0.212918	5.00995	-1.37623	0.172164	0.324429	-5.63212
ENSG00000031081	ARHGAP31	1.2507	0.483923	3.66995	0.000410694	0.00427696	-0.165901
ENSG00000031691	CENPQ	0.784035	0.314603	2.15732	0.0336439	0.102058	-4.05346
ENSG00000031698	SARS1	0.337159	4.157	1.18219	0.240244	0.406444	-5.7761
ENSG00000031823	RANBP3	-0.378967	5.01027	-1.18729	0.238236	0.404132	-5.86768
ENSG00000032219	ARID4A	0.0856753	3.73101	0.313753	0.754434	0.854574	-6.36812
ENSG00000032389	EIPR1	-0.08358	3.63373	-0.245861	0.806349	0.889544	-6.3667
ENSG00000032444	PNPLA6	0.117093	4.24076	0.39419	0.694373	0.812521	-6.39262
ENSG00000032742	IFT88	-0.924181	4.59988	-3.49469	0.000738439	0.00647348	-0.856235
ENSG00000033011	ALG1	0.612013	2.28078	1.87594	0.0639032	0.162856	-4.61913
ENSG00000033030	ZCCHC8	0.2739	3.40068	1.2433	0.216984	0.380047	-5.63291
ENSG00000033050	ABCF2	-0.270241	1.88749	-0.764409	0.446622	0.616573	-5.98299
ENSG00000033100	CHPF2	-0.0877883	2.32507	-0.31624	0.752553	0.853258	-6.238
ENSG00000033122	LRRC7	-0.199912	-0.648316	-0.594839	0.553443	0.707196	-6.13076
ENSG00000033170	FUT8	-0.460275	4.24301	-1.37456	0.172678	0.3251	-5.54557
ENSG00000033178	UBA6	0.265037	5.22338	1.28813	0.201	0.360424	-5.7666
ENSG00000033327	GAB2	-0.0770735	3.19368	-0.20174	0.840575	0.910277	-6.34143
ENSG00000033627	ATP6V0A1	-0.128297	4.02288	-0.37431	0.709054	0.822134	-6.38144
ENSG00000033800	PIAS1	-0.350667	4.98149	-1.75564	0.0825501	0.194678	-5.05663
ENSG00000033867	SLC4A7	0.189423	3.13505	0.716119	0.475771	0.642377	-6.11393
ENSG00000034053	APBA2	-0.194444	0.0118812	-0.553697	0.581158	0.728063	-6.11137
ENSG00000034152	MAP2K3	-0.0169685	5.57209	-0.0828559	0.93415	0.964189	-6.623
ENSG00000034239	EFCAB1	-1.72633	5.73739	-5.67985	1.63e-07	1.84e-05	7.02737
ENSG00000034510	TMSB10	-0.549404	9.73574	-3.62686	0.000475227	0.00477323	-0.881449
ENSG00000034533	ASTE1	-0.428961	0.719029	-1.32025	0.190098	0.347099	-5.39625
ENSG00000034677	RNF19A	-0.0131533	5.84743	-0.0658629	0.947633	0.97205	-6.65483
ENSG00000034693	PEX3	-0.957657	2.64395	-2.97387	0.00377351	0.0212691	-2.17524
ENSG00000034713	GABARAPL2	-0.142376	5.64175	-0.673529	0.502336	0.665588	-6.41
ENSG00000035115	SH3YL1	-0.41915	4.71763	-1.56471	0.121158	0.254732	-5.33277
ENSG00000035141	FAM136A	0.236459	3.27078	0.985274	0.32713	0.502819	-5.89869
ENSG00000035403	VCL	0.289961	3.4285	0.940345	0.349557	0.524655	-5.95802
ENSG00000035499	DEPDC1B	0.279181	-0.556393	0.870829	0.386163	0.560766	-5.92016
ENSG00000035664	DAPK2	0.192083	2.6876	0.581625	0.562273	0.713753	-6.1596
ENSG00000035681	NSMAF	-0.321013	5.4442	-1.02036	0.310292	0.485817	-6.09824
ENSG00000035687	ADSS2	-0.0980879	5.51592	-0.594345	0.553772	0.707506	-6.44448
ENSG00000035720	STAP1	-0.109899	2.70483	-0.294986	0.768684	0.864447	-6.26219
ENSG00000035862	TIMP2	0.222912	2.08496	0.685668	0.494684	0.659177	-6.06181
ENSG00000035928	RFC1	0.0074777	5.21353	0.0323788	0.974242	0.98645	-6.58501
ENSG00000036054	TBC1D23	-0.56184	3.67797	-2.2479	0.0270245	0.0871522	-3.98062
ENSG00000036257	CUL3	-0.43799	6.01922	-2.35062	0.020926	0.0724874	-4.0098
ENSG00000036448	MYOM2	0.729597	-0.143238	1.841	0.0689145	0.171862	-4.64862
ENSG00000036530	CYP46A1	-0.0957836	2.82331	-0.348111	0.72857	0.835264	-6.26942
ENSG00000036549	AC118549.1	0.251761	4.02636	0.993053	0.323345	0.499533	-5.96432
ENSG00000036565	SLC18A1	0.151337	-0.968205	0.522447	0.602642	0.744822	-6.18596
ENSG00000036672	USP2	-0.915807	3.65482	-2.67195	0.00895076	0.0392961	-3.02099
ENSG00000036828	CASR	1.02263	-0.437521	3.37997	0.00107339	0.00855059	-1.04416
ENSG00000037042	TUBG2	-0.28301	0.977992	-0.901028	0.369977	0.545422	-5.84236
ENSG00000037241	RPL26L1	-0.163361	3.38042	-0.467255	0.641446	0.77276	-6.26444
ENSG00000037280	FLT4	0.464078	-1.00689	1.98424	0.0502741	0.136862	-4.43225
ENSG00000037474	NSUN2	-0.109115	3.94852	-0.495976	0.62112	0.758503	-6.31496
ENSG00000037637	FBXO42	-0.107173	2.14887	-0.403102	0.687829	0.80786	-6.20156
ENSG00000037749	MFAP3	-1.32689	3.8835	-4.00322	0.00012817	0.00186369	0.828922
ENSG00000037757	MRI1	-0.0823058	1.54875	-0.275262	0.783746	0.874728	-6.21777
ENSG00000037897	METTL1	-0.098131	0.250885	-0.272633	0.78576	0.875724	-6.21644
ENSG00000038002	AGA	0.698298	1.98974	1.80643	0.0741924	0.181033	-4.72463
ENSG00000038210	PI4K2B	0.0782559	3.42214	0.312915	0.755068	0.85482	-6.32823
ENSG00000038219	BOD1L1	0.0131377	4.19684	0.0752334	0.940196	0.967689	-6.46386
ENSG00000038274	MAT2B	0.245006	5.35516	1.72385	0.0881669	0.203814	-5.14837
ENSG00000038295	TLL1	0.816766	-1.60172	3.63734	0.000458696	0.00464989	-0.307198
ENSG00000038358	EDC4	0.0494124	3.46106	0.206672	0.836733	0.908263	-6.35926
ENSG00000038382	TRIO	-0.0446351	5.28601	-0.232644	0.816566	0.896054	-6.56655
ENSG00000038427	VCAN	0.852627	1.57287	2.32143	0.022521	0.0763064	-3.73752
ENSG00000038532	CLEC16A	0.360919	4.47069	2.04661	0.0436119	0.123566	-4.47398
ENSG00000038945	MSR1	-0.242293	4.39158	-0.875305	0.383737	0.558379	-6.10818
ENSG00000039068	CDH1	-0.377507	5.55726	-1.60482	0.112035	0.241663	-5.36532
ENSG00000039123	MTREX	-0.1002	4.41154	-0.462251	0.645016	0.775969	-6.3844
ENSG00000039139	DNAH5	-0.99116	5.05271	-3.07143	0.0028172	0.0172352	-2.12432
ENSG00000039319	ZFYVE16	-0.436001	4.75029	-1.85843	0.0663745	0.167205	-4.85447
ENSG00000039523	RIPOR1	0.891591	3.8092	3.20843	0.00184925	0.0126645	-1.63049
ENSG00000039537	C6	0.808591	-1.23044	2.15746	0.0336322	0.102041	-4.10593
ENSG00000039560	RAI14	-0.271734	4.69935	-1.04164	0.300366	0.475449	-5.99349
ENSG00000039650	PNKP	-0.167942	4.78957	-0.590321	0.556454	0.709662	-6.36313
ENSG00000039987	BEST2	-0.327287	-0.375473	-0.947415	0.345963	0.521696	-5.85057
ENSG00000040199	PHLPP2	0.670088	1.26793	2.16826	0.0327755	0.100352	-4.0305
ENSG00000040275	SPDL1	0.609562	1.97615	1.7337	0.0863936	0.20094	-4.8406
ENSG00000040341	STAU2	0.210611	5.45773	1.04541	0.298633	0.473712	-6.07241
ENSG00000040487	SLC66A1	-0.636574	1.07879	-2.02364	0.0459713	0.1283	-4.28826
ENSG00000040531	CTNS	-0.789827	3.82478	-2.32001	0.0226009	0.076512	-3.84619
ENSG00000040608	RTN4R	1.03696	-1.53332	3.94516	0.000157696	0.00216809	0.67929
ENSG00000040633	PHF23	-0.0842134	3.55636	-0.292677	0.770443	0.865627	-6.34826
ENSG00000040933	INPP4A	0.287521	3.52322	1.1659	0.246736	0.414096	-5.7332
ENSG00000041353	RAB27B	0.677304	2.44589	2.31259	0.0230247	0.0776101	-3.77774
ENSG00000041357	PSMA4	0.120093	6.68989	0.60418	0.547244	0.70179	-6.56712
ENSG00000041515	MYO16	0.769126	-1.01877	3.45252	0.000848074	0.00715173	-0.847159
ENSG00000041802	LSG1	-0.135267	4.14737	-0.516296	0.606913	0.748072	-6.32711
ENSG00000041880	PARP3	0.342096	3.19181	1.04111	0.300613	0.475703	-5.83048
ENSG00000041982	TNC	1.58	2.14098	3.50793	0.000706881	0.00625365	-0.697343
ENSG00000041988	THAP3	-0.0657493	1.07068	-0.160146	0.873125	0.93005	-6.2261
ENSG00000042062	RIPOR3	0.307472	1.72939	0.82563	0.411196	0.584795	-5.93684
ENSG00000042088	TDP1	-0.207288	3.74948	-0.804942	0.422974	0.594789	-6.0927
ENSG00000042286	AIFM2	-0.0797139	0.655198	-0.288412	0.773694	0.86776	-6.20143
ENSG00000042304	C2orf83	0.240969	-0.477006	0.756176	0.451518	0.621239	-6.00933
ENSG00000042317	AL049834.1	-1.98547	3.56191	-5.56943	2.62e-07	2.52e-05	6.65643
ENSG00000042429	MED17	0.0334873	3.77393	0.13707	0.891281	0.94075	-6.41168
ENSG00000042445	RETSAT	-0.0829812	3.23727	-0.284927	0.776354	0.869436	-6.3214
ENSG00000042493	CAPG	0.25525	4.75365	1.00952	0.315433	0.491893	-6.02646
ENSG00000042753	AP2S1	-0.149892	4.77129	-0.489305	0.625815	0.761753	-6.41397
ENSG00000042813	ZPBP	0.17762	-1.48528	0.661386	0.510054	0.671798	-6.13541
ENSG00000042832	TG	-0.514605	1.04817	-1.10086	0.273891	0.445228	-5.65399
ENSG00000042980	ADAM28	0.236385	6.18005	0.827874	0.409931	0.583349	-6.35501
ENSG00000043039	BARX2	-0.150002	0.0161951	-0.488268	0.626547	0.76236	-6.1438
ENSG00000043093	DCUN1D1	0.452915	4.60025	2.31431	0.0229259	0.0773725	-3.93926
ENSG00000043143	JADE2	-0.469967	4.20668	-2.08904	0.0395257	0.114997	-4.36018
ENSG00000043462	LCP2	-0.388501	6.04851	-0.962741	0.338256	0.513758	-6.22185
ENSG00000043514	TRIT1	-1.26795	3.21899	-4.08548	9.53e-05	0.0015124	1.1444
ENSG00000043591	ADRB1	0.00724872	1.58076	0.0224085	0.982172	0.99096	-6.25658
ENSG00000044090	CUL7	0.624274	1.39691	2.4315	0.0170165	0.0626637	-3.47661
ENSG00000044115	CTNNA1	0.233038	7.63277	1.36826	0.174634	0.327467	-5.91771
ENSG00000044446	PHKA2	-0.663119	3.09732	-1.74224	0.0848817	0.198493	-4.8797
ENSG00000044459	CNTLN	0.122181	1.90002	0.420736	0.67495	0.799028	-6.1908
ENSG00000044524	EPHA3	1.76569	-0.811909	6.24025	1.4e-08	4.39e-06	9.41346
ENSG00000044574	HSPA5	0.00324908	5.49366	0.0196114	0.984397	0.991713	-6.61659
ENSG00000046604	DSG2	0.414351	2.15632	1.35467	0.178912	0.333088	-5.41298
ENSG00000046647	GEMIN8	-0.265177	3.46464	-0.756282	0.451454	0.621204	-6.10407
ENSG00000046651	OFD1	-0.460536	4.55531	-1.8686	0.0649298	0.164557	-4.81303
ENSG00000046653	GPM6B	-0.753488	2.36291	-1.87335	0.0642633	0.163538	-4.59603
ENSG00000046889	PREX2	1.12344	-1.5377	5.88218	6.8e-08	1.09e-05	7.9314
ENSG00000047056	WDR37	-0.230084	2.83205	-0.781001	0.43685	0.607428	-6.0234
ENSG00000047188	YTHDC2	0.192099	3.46195	0.761123	0.448572	0.618588	-6.10979
ENSG00000047230	CTPS2	-0.460081	2.03673	-1.54788	0.12516	0.260517	-5.11116
ENSG00000047249	ATP6V1H	-0.269332	4.58794	-0.963208	0.338023	0.513642	-6.05363
ENSG00000047315	POLR2B	0.266476	4.66488	1.32773	0.187625	0.344269	-5.65595
ENSG00000047346	FAM214A	-0.436937	5.68233	-2.42876	0.0171378	0.0629269	-3.80164
ENSG00000047365	ARAP2	-0.335485	5.67531	-1.8636	0.0656364	0.165929	-4.94476
ENSG00000047410	TPR	-0.334415	5.47682	-2.26093	0.0261728	0.0851758	-4.14809
ENSG00000047457	CP	-0.146074	6.38755	-0.607702	0.544915	0.699678	-6.53364
ENSG00000047578	KIAA0556	-0.541123	5.64359	-2.24406	0.0272795	0.0877331	-4.20178
ENSG00000047579	DTNBP1	0.13668	2.66224	0.399131	0.690742	0.810002	-6.23143
ENSG00000047597	XK	0.284531	-1.02478	1.18682	0.23842	0.404287	-5.63552
ENSG00000047617	ANO2	1.20017	-0.886193	2.92326	0.00438022	0.0236486	-2.31673
ENSG00000047621	C12orf4	-0.906119	3.65111	-2.96933	0.00382454	0.0214829	-2.26696
ENSG00000047634	SCML1	0.268415	0.997906	0.804557	0.423195	0.594892	-5.93403
ENSG00000047644	WWC3	0.027796	2.14441	0.115068	0.908647	0.950244	-6.27498
ENSG00000047648	ARHGAP6	0.670571	-0.577551	2.1397	0.035084	0.105332	-4.10828
ENSG00000047849	MAP4	-0.461495	4.31193	-3.12804	0.0023709	0.015256	-1.89457
ENSG00000047932	GOPC	0.436702	2.00718	1.51206	0.134021	0.273333	-5.18257
ENSG00000048028	USP28	-0.243797	4.07769	-0.747505	0.456706	0.626224	-6.17582
ENSG00000048052	HDAC9	-0.0726221	3.89684	-0.187131	0.851979	0.917566	-6.40908
ENSG00000048140	TSPAN17	-0.542804	2.44662	-1.98311	0.0504018	0.137064	-4.40837
ENSG00000048162	NOP16	-0.0505309	1.4096	-0.123384	0.902078	0.945781	-6.23659
ENSG00000048342	CC2D2A	-0.869157	5.88424	-4.04693	0.000109515	0.00167407	0.811635
ENSG00000048392	RRM2B	0.239227	3.66781	0.828332	0.409672	0.583241	-6.06709
ENSG00000048405	ZNF800	0.440752	3.75914	1.58287	0.116957	0.248907	-5.19736
ENSG00000048462	TNFRSF17	0.974214	-1.23581	2.51801	0.0135692	0.0531615	-3.32803
ENSG00000048471	SNX29	-0.305875	3.89261	-1.25058	0.214327	0.376942	-5.66552
ENSG00000048540	LMO3	-0.370006	-0.0350937	-0.758851	0.449923	0.61993	-5.98305
ENSG00000048544	MRPS10	-0.0813125	2.91594	-0.283698	0.777293	0.870191	-6.28904
ENSG00000048649	RSF1	0.229292	5.20745	1.27785	0.204588	0.364904	-5.77956
ENSG00000048707	VPS13D	-0.426383	4.8366	-2.10565	0.0380182	0.111692	-4.40293
ENSG00000048740	CELF2	0.365733	3.37001	1.0415	0.300434	0.475477	-5.84509
ENSG00000048828	FAM120A	-0.0871466	5.30943	-0.633279	0.528157	0.685809	-6.39808
ENSG00000048991	R3HDM1	-0.350585	4.30182	-1.35502	0.1788	0.332957	-5.58093
ENSG00000049089	COL9A2	0.358052	1.79361	1.10794	0.27084	0.441995	-5.68248
ENSG00000049130	KITLG	0.30024	2.95945	0.976148	0.331606	0.507173	-5.87799
ENSG00000049167	ERCC8	-0.611493	2.04068	-1.82549	0.0712424	0.175587	-4.66458
ENSG00000049192	ADAMTS6	0.940174	-1.21552	3.03046	0.00318752	0.0188404	-2.0478
ENSG00000049239	H6PD	-0.114729	2.68133	-0.553247	0.581466	0.728237	-6.16558
ENSG00000049245	VAMP3	0.234933	5.04736	1.04644	0.298158	0.473141	-6.0245
ENSG00000049246	PER3	0.277001	3.1797	0.956883	0.341188	0.516776	-5.91443
ENSG00000049247	UTS2	0.995025	-1.1278	2.69097	0.0084925	0.0378825	-2.91275
ENSG00000049249	TNFRSF9	0.510609	0.262068	1.54057	0.126928	0.263003	-5.11691
ENSG00000049283	EPN3	0.410321	3.67728	1.24243	0.217303	0.380385	-5.67442
ENSG00000049323	LTBP1	0.32786	0.523619	0.823945	0.412148	0.58527	-5.92287
ENSG00000049449	RCN1	0.137843	3.13163	0.410472	0.682435	0.804058	-6.2712
ENSG00000049540	ELN	-1.1581	4.25313	-3.94747	0.000156407	0.00215579	0.611839
ENSG00000049541	RFC2	0.336601	2.24115	1.00673	0.31676	0.493118	-5.80099
ENSG00000049618	ARID1B	-0.452945	5.37702	-2.7758	0.0066973	0.0319329	-2.93772
ENSG00000049656	CLPTM1L	-0.275494	5.07254	-1.26389	0.209531	0.371016	-5.78624
ENSG00000049759	NEDD4L	-0.806429	6.18235	-3.70846	0.000360141	0.00388164	-0.328564
ENSG00000049768	FOXP3	1.16842	-0.93397	3.96207	0.000148484	0.00207624	0.752162
ENSG00000049769	PPP1R3F	0.314099	0.10416	0.931544	0.354063	0.529336	-5.838
ENSG00000049860	HEXB	-0.0765856	4.7614	-0.297947	0.76643	0.862622	-6.48956
ENSG00000049883	PTCD2	0.472523	0.603426	1.5196	0.132116	0.270701	-5.14546
ENSG00000050030	NEXMIF	1.10622	-0.386094	4.10652	8.82e-05	0.00143576	1.2395
ENSG00000050130	JKAMP	-0.969339	4.28941	-3.27802	0.00148639	0.0108936	-1.46735
ENSG00000050165	DKK3	1.00772	-0.408405	2.46371	0.015651	0.0589443	-3.42209
ENSG00000050327	ARHGEF5	0.0763895	3.42744	0.333286	0.739693	0.84411	-6.32407
ENSG00000050344	NFE2L3	-0.479433	4.20176	-1.44771	0.151171	0.296167	-5.44339
ENSG00000050393	MCUR1	1.05803	1.76648	3.53899	0.000637773	0.00583538	-0.586905
ENSG00000050405	LIMA1	0.249858	5.28555	1.29484	0.198686	0.357604	-5.76845
ENSG00000050426	LETMD1	-1.01838	3.91382	-2.84073	0.00556533	0.0281649	-2.62248
ENSG00000050438	SLC4A8	-1.01551	3.13486	-2.77617	0.00669021	0.0319176	-2.73059
ENSG00000050628	PTGER3	0.684652	-1.03789	2.48422	0.0148329	0.0568566	-3.39694
ENSG00000050730	TNIP3	0.425529	1.35674	1.11694	0.266992	0.437527	-5.66043
ENSG00000050748	MAPK9	0.110387	4.04461	0.515485	0.607477	0.748598	-6.31729
ENSG00000050767	COL23A1	0.705309	-1.38978	2.49008	0.0146064	0.0561855	-3.40152
ENSG00000050820	BCAR1	-0.996105	3.4356	-3.09582	0.0026161	0.0163464	-1.90134
ENSG00000051009	FAM160A2	-0.354298	2.55838	-1.18508	0.239105	0.40506	-5.61588
ENSG00000051108	HERPUD1	-0.222794	5.96338	-1.22818	0.22258	0.386773	-5.92658
ENSG00000051128	HOMER3	0.433039	1.48628	1.14634	0.25469	0.423631	-5.63546
ENSG00000051180	RAD51	0.0254153	-0.203991	0.0735365	0.941542	0.968488	-6.26832
ENSG00000051341	POLQ	-0.290036	1.01966	-0.970023	0.334634	0.509956	-5.77665
ENSG00000051382	PIK3CB	0.0617531	3.93158	0.333821	0.739291	0.843772	-6.38337
ENSG00000051523	CYBA	-0.354526	6.37823	-1.77986	0.0784732	0.188093	-5.16549
ENSG00000051596	THOC3	-0.0309322	4.81317	-0.0955898	0.924059	0.957947	-6.53307
ENSG00000051620	HEBP2	-0.327728	4.33058	-1.32578	0.188267	0.344921	-5.62289
ENSG00000051825	MPHOSPH9	-0.120179	4.02424	-0.416078	0.678343	0.80154	-6.3581
ENSG00000052126	PLEKHA5	-0.808476	5.669	-3.25841	0.00158127	0.0113605	-1.65577
ENSG00000052344	PRSS8	0.177389	3.32994	0.586802	0.558805	0.71118	-6.21702
ENSG00000052723	SIKE1	0.0624356	3.16887	0.241529	0.809695	0.891514	-6.32582
ENSG00000052749	RRP12	-0.490119	4.09656	-1.92163	0.0578156	0.151654	-4.66687
ENSG00000052795	FNIP2	0.275415	2.94253	0.975878	0.33174	0.507243	-5.87684
ENSG00000052802	MSMO1	-1.00522	3.4887	-2.8704	0.00510904	0.0264182	-2.50864
ENSG00000052841	TTC17	-0.516683	4.84665	-1.94918	0.0543866	0.145002	-4.70123
ENSG00000053108	FSTL4	-1.15195	1.06944	-2.71568	0.00792904	0.0359359	-2.78501
ENSG00000053254	FOXN3	-0.513984	6.34727	-2.2372	0.0277413	0.0888003	-4.28867
ENSG00000053371	AKR7A2	-0.755068	3.16927	-2.25713	0.0264187	0.0857707	-3.92086
ENSG00000053372	MRTO4	0.0750946	1.66537	0.244249	0.807594	0.890094	-6.23262
ENSG00000053438	NNAT	0.101261	0.187085	0.28644	0.775199	0.868617	-6.21534
ENSG00000053501	USE1	-0.219334	2.04658	-0.586287	0.55915	0.711408	-6.09325
ENSG00000053524	MCF2L2	0.0489708	2.55936	0.164347	0.869827	0.927987	-6.29547
ENSG00000053702	NRIP2	0.649504	-0.204783	2.30702	0.023347	0.0784066	-3.75282
ENSG00000053747	LAMA3	0.79009	2.09914	2.20294	0.0301515	0.0944944	-3.99345
ENSG00000053770	AP5M1	0.153878	4.18719	0.639346	0.524221	0.682999	-6.26241
ENSG00000053900	ANAPC4	-0.364934	4.16799	-1.0146	0.313016	0.488914	-5.95481
ENSG00000053918	KCNQ1	1.05777	2.09816	2.9482	0.00407083	0.0224436	-2.26492
ENSG00000054116	TRAPPC3	0.0287385	3.75463	0.110789	0.91203	0.951356	-6.4067
ENSG00000054118	THRAP3	-0.355303	5.24112	-2.40821	0.0180694	0.0652989	-3.80204
ENSG00000054148	PHPT1	-0.751592	3.15407	-1.83456	0.069873	0.173592	-4.72831
ENSG00000054179	ENTPD2	0.846945	-0.902296	3.10943	0.0025098	0.0158757	-1.82119
ENSG00000054219	LY75	-0.499641	3.72878	-2.11483	0.0372075	0.110039	-4.26377
ENSG00000054267	ARID4B	0.188291	5.23758	1.00199	0.319035	0.495625	-6.09007
ENSG00000054277	OPN3	0.783526	0.463676	2.34768	0.0210816	0.0729188	-3.65513
ENSG00000054282	SDCCAG8	-1.01539	4.66186	-3.57012	0.000574955	0.00546131	-0.628235
ENSG00000054392	HHAT	-0.278044	1.65514	-0.947183	0.34608	0.521777	-5.81185
ENSG00000054523	KIF1B	-0.201186	4.04676	-1.05633	0.293644	0.467834	-5.90072
ENSG00000054598	FOXC1	0.00334523	1.98069	0.0114675	0.990876	0.99518	-6.26803
ENSG00000054611	TBC1D22A	0.139248	3.45829	0.566565	0.572419	0.721319	-6.2283
ENSG00000054654	SYNE2	-0.469432	6.52899	-2.61476	0.0104675	0.0440565	-3.44936
ENSG00000054690	PLEKHH1	-0.67583	4.93481	-1.99384	0.0491956	0.134776	-4.62671
ENSG00000054793	ATP9A	-0.361436	3.17194	-1.4133	0.161016	0.309248	-5.3837
ENSG00000054938	CHRDL2	0.179498	-1.50747	0.535376	0.59371	0.738668	-6.21116
ENSG00000054965	FAM168A	0.251851	3.142	0.925611	0.357122	0.532357	-5.94307
ENSG00000054967	RELT	1.04164	1.70117	2.27211	0.0254612	0.0835063	-3.84452
ENSG00000054983	GALC	-1.36679	4.8683	-4.75692	7.44e-06	0.000253683	3.43174
ENSG00000055044	NOP58	-0.12229	4.78344	-0.488813	0.626163	0.762119	-6.415
ENSG00000055070	SZRD1	0.253198	4.63908	1.21685	0.22684	0.392037	-5.78858
ENSG00000055130	CUL1	0.149355	4.30631	0.75563	0.451843	0.621544	-6.19355
ENSG00000055147	FAM114A2	-0.197545	3.15159	-0.609204	0.543923	0.698751	-6.16768
ENSG00000055163	CYFIP2	0.0138621	5.04736	0.0698216	0.94449	0.970059	-6.56422
ENSG00000055208	TAB2	0.25841	5.19532	1.77196	0.0797833	0.190232	-5.05128
ENSG00000055211	GINM1	-0.251342	3.33156	-0.930583	0.354558	0.529834	-5.95238
ENSG00000055332	EIF2AK2	-0.620422	5.86189	-2.84087	0.00556317	0.0281649	-2.81936
ENSG00000055483	AC022966.1	0.685149	4.42729	2.74526	0.00729935	0.0339161	-2.91831
ENSG00000055609	KMT2C	-0.339197	5.02429	-1.95435	0.0537631	0.14383	-4.70965
ENSG00000055732	MCOLN3	-0.114674	0.81514	-0.393567	0.694831	0.812883	-6.16501
ENSG00000055917	PUM2	-0.284956	5.59542	-1.82382	0.0714972	0.176001	-5.00775
ENSG00000055950	MRPL43	-0.78056	3.54413	-2.39043	0.0189116	0.0675351	-3.66097
ENSG00000055955	ITIH4	1.1179	1.1456	2.77346	0.00674164	0.0320563	-2.67948
ENSG00000055957	ITIH1	-0.301801	-0.674387	-1.03604	0.302957	0.478028	-5.78292
ENSG00000056050	HPF1	-0.285177	2.27752	-0.658992	0.511582	0.672788	-6.05825
ENSG00000056097	ZFR	0.160995	4.73837	1.06644	0.289076	0.462804	-5.96818
ENSG00000056277	ZNF280C	0.782134	0.461307	2.53757	0.0128822	0.0512103	-3.23562
ENSG00000056558	TRAF1	1.05655	1.12441	2.77082	0.00679218	0.0322074	-2.68905
ENSG00000056586	RC3H2	0.0230531	4.20962	0.124968	0.900828	0.945437	-6.45834
ENSG00000056736	IL17RB	0.471375	-0.409536	1.60219	0.112616	0.242598	-5.0454
ENSG00000056972	TRAF3IP2	-0.0390642	3.8578	-0.150837	0.880442	0.934088	-6.41394
ENSG00000056998	GYG2	0.0658167	-0.316411	0.197524	0.843863	0.912341	-6.25659
ENSG00000057019	DCBLD2	-1.28723	3.59015	-4.43091	2.64e-05	0.000614202	2.31702
ENSG00000057149	SERPINB3	0.233258	8.56712	0.817244	0.415946	0.588438	-6.60093
ENSG00000057252	SOAT1	-0.777468	4.02309	-3.46913	0.000803179	0.00687206	-0.882921
ENSG00000057294	PKP2	-0.853865	3.14011	-3.13739	0.00230389	0.0149069	-1.77197
ENSG00000057608	GDI2	0.247754	6.08539	1.50948	0.134676	0.274136	-5.56272
ENSG00000057657	PRDM1	0.697085	3.26753	1.79	0.0768152	0.185392	-4.82485
ENSG00000057663	ATG5	0.158363	4.10179	0.650434	0.517068	0.6777	-6.24219
ENSG00000057704	TMCC3	0.273118	1.74398	0.614307	0.540562	0.696094	-6.09005
ENSG00000057757	PITHD1	-0.422897	3.25134	-1.45314	0.14966	0.293769	-5.33153
ENSG00000057935	MTA3	-0.396303	3.71981	-1.27028	0.207258	0.36842	-5.62226
ENSG00000058056	USP13	1.2996	0.564499	4.21106	6.01e-05	0.0010934	1.59633
ENSG00000058063	ATP11B	-0.256632	4.71037	-1.17799	0.241904	0.408364	-5.84417
ENSG00000058085	LAMC2	-0.6236	3.38645	-2.33879	0.0215599	0.0740576	-3.76448
ENSG00000058091	CDK14	-0.70974	3.00552	-1.94179	0.055289	0.146954	-4.5195
ENSG00000058262	SEC61A1	-0.18552	4.53554	-1.11883	0.266187	0.436426	-5.89089
ENSG00000058272	PPP1R12A	-0.187365	5.34936	-1.06663	0.288991	0.462804	-6.03971
ENSG00000058335	RASGRF1	-0.12751	-0.0810845	-0.374777	0.708708	0.822023	-6.19887
ENSG00000058404	CAMK2B	0.387649	1.56625	0.737761	0.462578	0.631188	-6.0248
ENSG00000058453	CROCC	-0.766083	5.59155	-2.36576	0.0201383	0.070624	-3.93394
ENSG00000058600	POLR3E	0.00912294	4.1193	0.0300964	0.976057	0.987496	-6.45425
ENSG00000058668	ATP2B4	-0.387275	4.2674	-2.10566	0.0380181	0.111692	-4.34018
ENSG00000058673	ZC3H11A	0.299137	5.03133	1.63532	0.105474	0.23187	-5.25527
ENSG00000058729	RIOK2	-0.440651	2.85173	-1.2277	0.222761	0.386965	-5.58567
ENSG00000058799	YIPF1	-0.286115	3.55744	-1.08013	0.28297	0.455981	-5.81906
ENSG00000058804	NDC1	1.16023	0.933545	4.09747	9.12e-05	0.00146636	1.21444
ENSG00000058866	DGKG	0.223942	-0.100092	0.651375	0.516464	0.677195	-6.05928
ENSG00000059122	FLYWCH1	-0.760706	3.6116	-2.26806	0.0257169	0.0841095	-3.93623
ENSG00000059145	UNKL	-0.684725	2.80263	-1.9232	0.0576148	0.151369	-4.54857
ENSG00000059377	TBXAS1	-0.570429	2.4872	-1.26569	0.20889	0.37017	-5.51129
ENSG00000059378	PARP12	-0.645961	5.63088	-2.79219	0.00639326	0.0309146	-2.92113
ENSG00000059573	ALDH18A1	0.0221486	3.10384	0.0786327	0.937499	0.966369	-6.34526
ENSG00000059588	TARBP1	-0.673035	3.75053	-1.99809	0.0487245	0.133868	-4.48892
ENSG00000059691	GATB	0.468498	1.91606	1.18486	0.239192	0.405131	-5.60535
ENSG00000059728	MXD1	0.660701	5.22814	1.88205	0.0630589	0.161356	-4.85829
ENSG00000059758	CDK17	-0.52575	5.10414	-1.90095	0.0605069	0.15656	-4.81564
ENSG00000059769	DNAJC25	0.378234	0.291581	1.29919	0.197194	0.3557	-5.44396
ENSG00000059804	SLC2A3	-0.148699	4.65504	-0.304345	0.761568	0.859154	-6.47326
ENSG00000059915	PSD	0.337454	1.25489	0.781601	0.436499	0.607146	-5.9655
ENSG00000060069	CTDP1	0.0156735	3.84594	0.0508728	0.95954	0.977436	-6.42321
ENSG00000060138	YBX3	0.0420866	6.61562	0.21813	0.827821	0.9023	-6.71695
ENSG00000060140	STYK1	-0.418535	2.79244	-0.937883	0.350814	0.526156	-5.88076
ENSG00000060237	WNK1	-0.349472	6.1439	-1.74743	0.0839723	0.196928	-5.19636
ENSG00000060339	CCAR1	-0.0114687	5.36328	-0.0690587	0.945096	0.970419	-6.59949
ENSG00000060491	OGFR	-0.13672	3.86847	-0.655866	0.513583	0.67452	-6.21128
ENSG00000060558	GNA15	0.198758	2.60796	0.730659	0.466884	0.635031	-6.04953
ENSG00000060642	PIGV	-0.844745	2.06958	-2.18827	0.031238	0.0969473	-3.98186
ENSG00000060656	PTPRU	-0.615229	3.96716	-1.80359	0.0746396	0.181726	-4.86279
ENSG00000060688	SNRNP40	0.387188	3.90893	1.43607	0.154448	0.300632	-5.42828
ENSG00000060709	RIMBP2	0.817002	-1.39151	3.2882	0.00143926	0.010605	-1.34072
ENSG00000060749	QSER1	1.10159	2.87971	3.91359	0.000176378	0.00234817	0.564602
ENSG00000060762	MPC1	-0.859142	4.86924	-2.63726	0.00984488	0.0421608	-3.22817
ENSG00000060971	ACAA1	-0.78172	4.90657	-3.19119	0.00195119	0.01323	-1.77602
ENSG00000060982	BCAT1	0.359673	2.57986	1.11934	0.265971	0.436183	-5.70198
ENSG00000061273	HDAC7	-0.112452	5.31076	-0.502359	0.616641	0.754562	-6.47057
ENSG00000061656	SPAG4	0.128727	0.936323	0.29207	0.770905	0.865698	-6.20215
ENSG00000061676	NCKAP1	0.018411	4.6856	0.0780136	0.93799	0.966681	-6.51996
ENSG00000061794	MRPS35	0.113394	3.69031	0.388537	0.698536	0.815067	-6.34076
ENSG00000061918	GUCY1B1	0.771191	-0.523515	2.53902	0.0128329	0.0510638	-3.24928
ENSG00000061936	SFSWAP	-0.221397	3.76947	-1.04988	0.296583	0.471326	-5.87586
ENSG00000061938	TNK2	0.367183	3.52729	1.08596	0.280397	0.452976	-5.81593
ENSG00000061987	MON2	-0.642562	4.812	-2.85232	0.00538288	0.0274619	-2.68576
ENSG00000062038	CDH3	1.31414	2.64885	3.60516	0.000511258	0.00502737	-0.410185
ENSG00000062194	GPBP1	0.0625545	5.96242	0.444127	0.658016	0.786073	-6.57124
ENSG00000062282	DGAT2	-0.535554	1.25735	-1.03742	0.302318	0.477341	-5.71967
ENSG00000062370	ZNF112	0.256081	0.121452	0.692939	0.490131	0.655025	-6.026
ENSG00000062485	CS	-0.00592653	5.46347	-0.0360908	0.97129	0.984982	-6.61439
ENSG00000062524	LTK	0.156875	0.681816	0.525832	0.600298	0.742988	-6.11398
ENSG00000062582	MRPS24	-0.437781	4.05885	-1.35879	0.177609	0.331377	-5.54604
ENSG00000062598	ELMO2	-0.255252	3.9858	-0.862096	0.390925	0.565827	-6.07077
ENSG00000062650	WAPL	0.215147	3.97238	1.14368	0.255787	0.424951	-5.79937
ENSG00000062716	VMP1	0.0856291	6.60201	0.38618	0.700274	0.815902	-6.66455
ENSG00000062725	APPBP2	-0.21748	3.38811	-1.03011	0.305715	0.480762	-5.85729
ENSG00000062822	POLD1	1.03	1.31045	3.03603	0.00313465	0.0186487	-2.00235
ENSG00000063015	SEZ6	-0.382056	0.0799102	-0.94267	0.348372	0.523932	-5.83389
ENSG00000063046	EIF4B	0.215181	6.22962	1.37722	0.171857	0.323925	-5.76442
ENSG00000063127	SLC6A16	0.0527638	1.39311	0.118074	0.906272	0.948365	-6.23823
ENSG00000063169	BICRA	0.14973	2.06218	0.481614	0.631249	0.765837	-6.17394
ENSG00000063176	SPHK2	0.180074	1.99006	0.624464	0.533902	0.690729	-6.07948
ENSG00000063177	RPL18	-0.639233	7.16628	-2.99756	0.00351696	0.0201908	-2.52496
ENSG00000063180	CA11	-0.00373826	0.191162	-0.0089828	0.992853	0.9961	-6.26009
ENSG00000063241	ISOC2	-0.720341	3.07909	-2.24701	0.0270835	0.0872565	-3.92363
ENSG00000063244	U2AF2	-0.359069	5.34942	-2.20605	0.0299252	0.0939935	-4.25013
ENSG00000063245	EPN1	-0.538937	4.16072	-2.45063	0.0161931	0.0605045	-3.5924
ENSG00000063322	MED29	-0.356843	3.63626	-1.55893	0.122522	0.256588	-5.21646
ENSG00000063438	AHRR	0.301553	-1.16114	0.943289	0.348057	0.523722	-5.89357
ENSG00000063587	ZNF275	1.19349	0.28552	4.37919	3.21e-05	0.00070806	2.17935
ENSG00000063601	MTMR1	-0.109364	3.89393	-0.478791	0.633248	0.767043	-6.31743
ENSG00000063660	GPC1	0.0318015	3.06075	0.0904674	0.928117	0.960561	-6.34726
ENSG00000063761	ADCK1	0.254853	0.786982	0.910303	0.365093	0.540847	-5.85276
ENSG00000063854	HAGH	-0.146164	3.98923	-0.731687	0.46626	0.634549	-6.17876
ENSG00000063978	RNF4	0.127331	4.69459	0.554328	0.580728	0.727846	-6.37123
ENSG00000064012	CASP8	-0.173962	5.04539	-0.849468	0.397874	0.572852	-6.20769
ENSG00000064042	LIMCH1	-0.16165	3.10392	-0.533505	0.594999	0.739051	-6.21115
ENSG00000064102	INTS13	0.167165	3.09272	0.491838	0.624031	0.76071	-6.22944
ENSG00000064115	TM7SF3	-0.421933	4.74583	-1.41887	0.15939	0.307012	-5.5484
ENSG00000064199	SPA17	-0.946735	5.14752	-2.81384	0.00601095	0.0296695	-2.81649
ENSG00000064201	TSPAN32	0.683543	-0.0770135	1.64174	0.104132	0.229693	-4.97502
ENSG00000064205	CCN5	0.741844	-0.620367	2.72828	0.00765496	0.0350325	-2.80079
ENSG00000064218	DMRT3	0.47861	0.690655	1.43433	0.154942	0.301251	-5.26588
ENSG00000064225	ST3GAL6	-0.554666	4.29861	-1.5235	0.131137	0.269134	-5.34717
ENSG00000064270	ATP2C2	-0.809426	5.27444	-2.2631	0.0260336	0.0849126	-4.12294
ENSG00000064300	NGFR	1.27642	-1.03506	4.21778	5.87e-05	0.00107398	1.60787
ENSG00000064309	CDON	0.279984	1.46481	0.844046	0.400881	0.575867	-5.91958
ENSG00000064313	TAF2	0.412014	4.1544	1.59037	0.115258	0.246409	-5.23133
ENSG00000064393	HIPK2	-0.126032	4.04125	-0.901626	0.369661	0.545073	-6.04544
ENSG00000064419	TNPO3	0.558262	3.35746	2.9148	0.00449009	0.0240832	-2.39425
ENSG00000064489	BORCS8-MEF2B	0.569549	0.899068	1.26369	0.209603	0.371104	-5.4906
ENSG00000064490	RFXANK	-0.642835	3.79901	-1.76393	0.0811347	0.192475	-4.90533
ENSG00000064545	TMEM161A	-0.138782	0.298661	-0.400628	0.689643	0.809309	-6.17169
ENSG00000064547	LPAR2	-0.0898994	1.76271	-0.21356	0.831373	0.904433	-6.23538
ENSG00000064601	CTSA	-0.267331	4.86926	-1.52862	0.129864	0.267457	-5.40215
ENSG00000064607	SUGP2	-0.341367	3.82597	-1.83735	0.0694559	0.172818	-4.78807
ENSG00000064651	SLC12A2	-0.00634988	4.10331	-0.0280901	0.977652	0.988619	-6.46484
ENSG00000064652	SNX24	-0.573979	3.76588	-1.77122	0.0799075	0.190445	-4.89347
ENSG00000064655	EYA2	-0.476891	4.43345	-1.70036	0.0925158	0.211343	-5.09405
ENSG00000064666	CNN2	0.0487123	5.71438	0.233882	0.815607	0.89551	-6.61507
ENSG00000064687	ABCA7	-0.197027	4.33269	-0.744805	0.458329	0.627505	-6.20561
ENSG00000064692	SNCAIP	-0.313004	2.70762	-0.795766	0.428261	0.599466	-5.99812
ENSG00000064703	DDX20	0.899359	1.44927	3.33709	0.00123186	0.00943715	-1.16362
ENSG00000064726	BTBD1	-0.837531	6.11276	-4.20923	6.05e-05	0.00109891	1.35318
ENSG00000064763	FAR2	0.0298085	3.97254	0.10041	0.920242	0.955277	-6.43843
ENSG00000064787	BCAS1	-0.564514	4.15965	-2.61244	0.0105334	0.0442431	-3.21483
ENSG00000064886	CHI3L2	0.305267	1.21811	0.679719	0.498426	0.662119	-6.03415
ENSG00000064932	SBNO2	-0.101907	5.29835	-0.403969	0.687193	0.807535	-6.51274
ENSG00000064933	PMS1	-0.127985	3.13296	-0.372336	0.710517	0.822958	-6.29147
ENSG00000064961	HMG20B	0.638298	4.21145	2.55484	0.0123023	0.0495049	-3.35921
ENSG00000064989	CALCRL	0.948867	0.214625	2.45001	0.0162193	0.0605554	-3.43504
ENSG00000064995	TAF11	0.202925	2.31379	0.686271	0.494305	0.658886	-6.06353
ENSG00000064999	ANKS1A	-0.285183	3.53767	-1.424	0.157902	0.304884	-5.4031
ENSG00000065000	AP3D1	0.0477285	4.86493	0.313326	0.754758	0.854704	-6.49342
ENSG00000065029	ZNF76	0.0427981	2.88319	0.134056	0.893658	0.941711	-6.32161
ENSG00000065054	SLC9A3R2	-0.0604835	4.88084	-0.240716	0.810323	0.891843	-6.51564
ENSG00000065057	NTHL1	-0.191848	1.1318	-0.469113	0.640122	0.771736	-6.14817
ENSG00000065060	UHRF1BP1	0.853935	1.64961	3.49204	0.000744931	0.00651692	-0.716264
ENSG00000065135	GNAI3	0.829357	2.75518	3.57034	0.000574523	0.00546131	-0.508978
ENSG00000065150	IPO5	0.0524813	4.67868	0.249464	0.80357	0.887374	-6.4907
ENSG00000065154	OAT	-0.531503	5.40124	-1.92438	0.0574654	0.151049	-4.80718
ENSG00000065183	WDR3	0.107947	1.8939	0.324841	0.746055	0.849273	-6.2206
ENSG00000065243	PKN2	-0.0331131	4.71157	-0.159803	0.873395	0.93005	-6.51266
ENSG00000065268	WDR18	-0.118237	1.89223	-0.32765	0.743937	0.847542	-6.20788
ENSG00000065308	TRAM2	0.523976	-0.0642455	2.02275	0.0460656	0.128474	-4.31767
ENSG00000065320	NTN1	0.0809207	2.33865	0.233408	0.815975	0.895598	-6.27758
ENSG00000065328	MCM10	1.55182	-0.619987	5.42434	4.85e-07	3.9e-05	6.08234
ENSG00000065357	DGKA	0.0787619	5.66266	0.379965	0.704866	0.819212	-6.56562
ENSG00000065361	ERBB3	-0.339771	5.63685	-1.34022	0.183546	0.339328	-5.75052
ENSG00000065371	ROPN1	0.643213	-1.52267	2.48308	0.0148775	0.0569747	-3.42428
ENSG00000065413	ANKRD44	-0.25016	4.50465	-0.656791	0.51299	0.673988	-6.28556
ENSG00000065427	KARS1	-0.335159	5.24234	-2.03971	0.0443097	0.12496	-4.57089
ENSG00000065457	ADAT1	-0.692429	4.37928	-2.39663	0.0186144	0.0667643	-3.73643
ENSG00000065485	PDIA5	0.417385	1.27097	1.04183	0.300281	0.47536	-5.73784
ENSG00000065491	TBC1D22B	0.0454691	1.44317	0.166992	0.867751	0.926739	-6.2366
ENSG00000065518	NDUFB4	-0.773922	5.61753	-2.66018	0.00924571	0.0402356	-3.24871
ENSG00000065526	SPEN	-0.0540244	4.19479	-0.294157	0.769315	0.864919	-6.42117
ENSG00000065534	MYLK	-0.460416	2.55446	-1.31187	0.1929	0.350693	-5.47849
ENSG00000065548	ZC3H15	0.198802	4.83246	1.07023	0.287375	0.461251	-5.97517
ENSG00000065559	MAP2K4	-0.0597373	4.74777	-0.251712	0.801837	0.886115	-6.50128
ENSG00000065600	PACC1	0.0601833	0.740163	0.148424	0.88234	0.935284	-6.23162
ENSG00000065613	SLK	-0.305047	5.14467	-1.99808	0.0487254	0.133868	-4.64036
ENSG00000065615	CYB5R4	0.0368077	3.69963	0.146753	0.883655	0.936101	-6.40292
ENSG00000065618	COL17A1	0.717416	0.482839	1.83191	0.0702713	0.17425	-4.65482
ENSG00000065621	GSTO2	-0.716938	2.64593	-2.28012	0.0249617	0.0823348	-3.83121
ENSG00000065665	SEC61A2	-0.401961	1.95868	-0.954945	0.342162	0.517452	-5.82112
ENSG00000065675	PRKCQ	0.367979	-0.387207	1.18922	0.23748	0.403475	-5.59426
ENSG00000065717	TLE2	-0.091654	2.92628	-0.231616	0.817362	0.896591	-6.3087
ENSG00000065802	ASB1	-0.0677093	2.17015	-0.192113	0.848086	0.915681	-6.26051
ENSG00000065809	FAM107B	-0.631088	7.36309	-4.67669	1.02e-05	0.000319353	2.94959
ENSG00000065833	ME1	-0.00145262	2.6045	-0.00469353	0.996266	0.99803	-6.31666
ENSG00000065882	TBC1D1	0.0719993	5.78656	0.490807	0.624757	0.76138	-6.52953
ENSG00000065883	CDK13	-0.474118	5.46506	-2.99015	0.00359539	0.0205823	-2.38485
ENSG00000065911	MTHFD2	0.468655	3.42919	1.31762	0.190972	0.348191	-5.53425
ENSG00000065923	SLC9A7	0.87046	1.06649	3.08664	0.00269018	0.0166885	-1.86474
ENSG00000065970	FOXJ2	0.868277	1.51569	3.20436	0.00187289	0.012805	-1.54569
ENSG00000065978	YBX1	0.0105829	6.29871	0.0609162	0.951561	0.973989	-6.7061
ENSG00000065989	PDE4A	0.86472	1.54839	3.24146	0.00166776	0.0117705	-1.43765
ENSG00000066027	PPP2R5A	-0.083397	3.90575	-0.387428	0.699354	0.815333	-6.35806
ENSG00000066044	ELAVL1	-0.160767	3.91049	-0.604644	0.546936	0.701505	-6.25084
ENSG00000066056	TIE1	0.649665	-1.25739	2.58903	0.0112225	0.0464151	-3.16666
ENSG00000066084	DIP2B	0.315249	3.26093	1.22643	0.223234	0.38758	-5.63514
ENSG00000066117	SMARCD1	-0.0071944	4.14953	-0.0251412	0.979998	0.989803	-6.46017
ENSG00000066135	KDM4A	-0.528486	4.31849	-2.08375	0.0400164	0.116086	-4.38755
ENSG00000066136	NFYC	-0.156834	4.46544	-0.676483	0.500468	0.663864	-6.26914
ENSG00000066185	ZMYND12	-1.02274	2.50136	-2.44619	0.0163811	0.0610098	-3.4497
ENSG00000066230	SLC9A3	1.36942	2.71248	3.76408	0.000297463	0.0033788	0.0679889
ENSG00000066248	NGEF	-0.187822	0.738449	-0.51049	0.610957	0.750968	-6.11231
ENSG00000066279	ASPM	1.76049	-1.10262	6.61059	2.64e-09	1.67e-06	10.989
ENSG00000066294	CD84	0.655893	1.25965	1.63805	0.104901	0.230872	-4.97785
ENSG00000066322	ELOVL1	-0.0317515	3.96419	-0.127951	0.898473	0.943998	-6.43468
ENSG00000066336	SPI1	-0.127431	4.51303	-0.325994	0.745185	0.848669	-6.44823
ENSG00000066379	ZNRD1	-0.892096	1.70728	-2.5498	0.0124691	0.0499556	-3.18631
ENSG00000066382	MPPED2	0.147553	-0.142039	0.457383	0.648498	0.778605	-6.16781
ENSG00000066405	CLDN18	-0.177915	0.195461	-0.517801	0.605867	0.747323	-6.12314
ENSG00000066422	ZBTB11	-0.384594	2.56357	-1.4085	0.162426	0.311289	-5.33505
ENSG00000066427	ATXN3	-0.413056	4.83285	-1.96628	0.0523458	0.140866	-4.66645
ENSG00000066455	GOLGA5	-0.138703	3.80907	-0.780112	0.437371	0.608048	-6.11942
ENSG00000066468	FGFR2	-0.104451	3.31308	-0.296135	0.767809	0.863759	-6.3418
ENSG00000066557	LRRC40	0.632279	0.939325	1.8294	0.0706491	0.174674	-4.65823
ENSG00000066583	ISOC1	0.666227	1.43406	1.95865	0.0532489	0.142714	-4.44462
ENSG00000066629	EML1	-0.687677	3.79368	-2.10159	0.0383823	0.112479	-4.29491
ENSG00000066651	TRMT11	-0.359256	3.29278	-0.922265	0.358855	0.534259	-5.94432
ENSG00000066654	THUMPD1	-0.143938	3.88466	-0.684356	0.495508	0.659685	-6.19697
ENSG00000066697	MSANTD3	0.14846	1.44938	0.404578	0.686747	0.807284	-6.16995
ENSG00000066739	ATG2B	-0.486683	3.36699	-1.54527	0.125788	0.261293	-5.22524
ENSG00000066777	ARFGEF1	-0.432994	4.70318	-3.1747	0.00205354	0.0136942	-1.80381
ENSG00000066813	ACSM2B	-1.00908	1.78582	-2.30661	0.0233709	0.0784709	-3.72708
ENSG00000066827	ZFAT	0.773853	2.01342	2.32698	0.0222096	0.07553	-3.73097
ENSG00000066855	MTFR1	-1.89125	3.89185	-5.29279	8.42e-07	5.69e-05	5.54559
ENSG00000066923	STAG3	-0.654983	5.54614	-2.16094	0.0333545	0.101518	-4.36301
ENSG00000066926	FECH	-0.310726	3.44636	-1.04971	0.296662	0.47136	-5.84105
ENSG00000066933	MYO9A	-0.534233	3.90806	-2.19456	0.0307682	0.0958519	-4.12252
ENSG00000067048	DDX3Y	1.38065	2.48932	1.99166	0.0494382	0.135147	-4.45386
ENSG00000067057	PFKP	-0.24176	4.50041	-0.959524	0.339864	0.515615	-6.04569
ENSG00000067064	IDI1	0.244023	4.64739	0.970522	0.334386	0.509911	-6.05367
ENSG00000067066	SP100	-0.130296	7.14977	-0.69278	0.49023	0.655051	-6.55935
ENSG00000067082	KLF6	0.62526	5.67608	2.47275	0.0152855	0.0580086	-3.69351
ENSG00000067113	PLPP1	-0.410264	2.19055	-1.04632	0.298216	0.473141	-5.74404
ENSG00000067141	NEO1	0.141382	3.00026	0.403397	0.687612	0.807722	-6.2679
ENSG00000067167	TRAM1	0.139565	5.51903	0.720321	0.473193	0.640372	-6.36292
ENSG00000067177	PHKA1	0.533195	0.806716	1.89068	0.061883	0.159117	-4.5501
ENSG00000067182	TNFRSF1A	-0.0363302	5.46163	-0.124276	0.901374	0.945568	-6.60505
ENSG00000067191	CACNB1	0.0966274	2.1181	0.226206	0.821554	0.898941	-6.26225
ENSG00000067208	EVI5	-1.01593	4.40801	-4.06657	0.000102011	0.00159503	0.998931
ENSG00000067221	STOML1	0.830271	1.34726	2.28248	0.0248164	0.0819814	-3.79863
ENSG00000067225	PKM	0.0172242	7.39104	0.131466	0.8957	0.942461	-6.8126
ENSG00000067248	DHX29	0.0751364	3.24366	0.275544	0.78353	0.874546	-6.33458
ENSG00000067334	DNTTIP2	0.328629	4.92284	1.34004	0.183604	0.339383	-5.66799
ENSG00000067365	METTL22	-1.3138	3.02501	-3.33902	0.00122429	0.00941382	-1.1844
ENSG00000067369	TP53BP1	-0.537614	4.81166	-2.42075	0.0174954	0.0637971	-3.72988
ENSG00000067445	TRO	-1.26273	1.02755	-3.0631	0.00288906	0.0175686	-1.89451
ENSG00000067533	RRP15	0.526753	0.82895	1.65905	0.100584	0.224278	-4.93436
ENSG00000067560	RHOA	-0.0371394	7.21502	-0.280609	0.779654	0.871584	-6.76454
ENSG00000067596	DHX8	-0.269117	4.19592	-1.15658	0.250503	0.418534	-5.81268
ENSG00000067606	PRKCZ	-0.0974737	3.89591	-0.389008	0.698189	0.814964	-6.36318
ENSG00000067646	ZFY	1.28619	-0.368622	2.75791	0.00704423	0.0330207	-2.72715
ENSG00000067704	IARS2	-0.0421873	3.77141	-0.17261	0.863346	0.924381	-6.40491
ENSG00000067715	SYT1	1.33689	-1.44813	4.43526	2.59e-05	0.000607553	2.35699
ENSG00000067798	NAV3	-0.965755	3.87225	-2.38999	0.0189332	0.0675686	-3.70052
ENSG00000067829	IDH3G	-0.0182977	4.17048	-0.0681639	0.945806	0.970844	-6.458
ENSG00000067836	ROGDI	-0.680748	3.61657	-1.88463	0.0627051	0.160727	-4.67981
ENSG00000067840	PDZD4	0.97418	-1.39374	3.2559	0.00159377	0.0114203	-1.43116
ENSG00000067900	ROCK1	-0.403732	5.25472	-2.35241	0.0208312	0.072291	-3.92736
ENSG00000067955	CBFB	0.363965	4.57002	2.1124	0.0374204	0.110509	-4.35358
ENSG00000067992	PDK3	0.622102	2.03337	2.27649	0.0251867	0.0828046	-3.84438
ENSG00000068001	HYAL2	-0.240631	0.4517	-0.684004	0.495729	0.659925	-6.01912
ENSG00000068024	HDAC4	-0.669301	4.00984	-1.73569	0.0860394	0.200315	-4.98055
ENSG00000068028	RASSF1	0.696663	1.07631	2.12133	0.036642	0.108779	-4.12189
ENSG00000068078	FGFR3	1.34605	2.58879	2.72747	0.00767232	0.0350924	-2.8587
ENSG00000068079	IFI35	-0.367514	5.00233	-1.14607	0.254804	0.423777	-5.91808
ENSG00000068097	HEATR6	-0.730204	2.78785	-2.33481	0.021777	0.0744604	-3.71979
ENSG00000068120	COASY	0.240833	3.95438	1.03876	0.301696	0.47685	-5.90645
ENSG00000068137	PLEKHH3	-0.146269	1.86584	-0.423707	0.67279	0.797334	-6.17671
ENSG00000068305	MEF2A	-0.631553	4.94498	-3.59792	0.000523836	0.00512952	-0.569015
ENSG00000068308	OTUD5	-0.150249	3.9736	-0.739028	0.461812	0.630485	-6.1671
ENSG00000068323	TFE3	0.0842285	2.87509	0.313043	0.754972	0.85477	-6.27995
ENSG00000068354	TBC1D25	0.914234	1.37091	2.88095	0.00495532	0.0257859	-2.4079
ENSG00000068366	ACSL4	0.717644	3.81857	2.81858	0.00593017	0.0294018	-2.6787
ENSG00000068383	INPP5A	1.10214	2.1363	2.96306	0.00389618	0.0218024	-2.2278
ENSG00000068394	GPKOW	0.226133	1.63899	0.695162	0.488744	0.653705	-6.02715
ENSG00000068400	GRIPAP1	0.302352	4.41726	1.24392	0.216758	0.379721	-5.72893
ENSG00000068438	FTSJ1	0.323987	3.06292	1.14232	0.25635	0.425659	-5.71315
ENSG00000068489	PRR11	0.104284	0.826156	0.309562	0.75761	0.856483	-6.20108
ENSG00000068615	REEP1	0.846416	-0.0333382	2.01384	0.0470109	0.130425	-4.3359
ENSG00000068650	ATP11A	-0.456988	3.75329	-1.60036	0.113022	0.243088	-5.17992
ENSG00000068654	POLR1A	0.332061	2.97816	1.14027	0.257196	0.426169	-5.71553
ENSG00000068697	LAPTM4A	-0.334421	5.8429	-1.91384	0.058817	0.153349	-4.87262
ENSG00000068724	TTC7A	0.250789	3.67639	1.49401	0.138668	0.279098	-5.32181
ENSG00000068745	IP6K2	-0.360601	5.12294	-1.90776	0.0596087	0.154822	-4.80743
ENSG00000068784	SRBD1	0.315577	3.00622	0.93625	0.351649	0.527216	-5.91515
ENSG00000068796	KIF2A	-0.689268	5.31074	-3.77677	0.000284692	0.00327916	-0.0338375
ENSG00000068831	RASGRP2	0.394806	1.42763	0.755371	0.451998	0.621587	-5.98204
ENSG00000068878	PSME4	-0.154252	5.05877	-0.84193	0.402058	0.57685	-6.21724
ENSG00000068885	IFT80	-0.504135	5.5304	-1.78696	0.0773094	0.186174	-5.06395
ENSG00000068903	SIRT2	-0.962574	4.56288	-5.51578	3.29e-07	2.89e-05	6.40924
ENSG00000068912	ERLEC1	-0.829795	4.24469	-2.68401	0.00865767	0.038393	-3.04833
ENSG00000068971	PPP2R5B	0.286026	1.69342	0.81495	0.417251	0.589572	-5.94757
ENSG00000068976	PYGM	-0.632833	0.887736	-1.33694	0.184609	0.340526	-5.36872
ENSG00000069011	PITX1	-0.547474	4.0258	-1.81646	0.0726275	0.177903	-4.8459
ENSG00000069020	MAST4	-0.805575	4.51282	-3.04916	0.00301318	0.0180835	-2.13126
ENSG00000069122	ADGRF5	0.174912	0.123151	0.524782	0.601024	0.743582	-6.12509
ENSG00000069188	SDK2	-0.614524	0.5073	-1.37661	0.172046	0.324244	-5.33912
ENSG00000069248	NUP133	-0.204296	3.12706	-0.747032	0.45699	0.626404	-6.08491
ENSG00000069275	NUCKS1	0.405143	5.01755	1.77819	0.0787477	0.188498	-5.02179
ENSG00000069329	VPS35	-0.33021	5.02202	-1.87232	0.064408	0.163786	-4.85907
ENSG00000069345	DNAJA2	0.0438137	4.71956	0.288158	0.773888	0.8678	-6.48544
ENSG00000069399	BCL3	-0.0886528	5.36392	-0.293692	0.769669	0.865109	-6.55902
ENSG00000069424	KCNAB2	-0.107203	3.9092	-0.316397	0.752433	0.853207	-6.37994
ENSG00000069431	ABCC9	0.416654	0.659566	1.44095	0.153069	0.298814	-5.2546
ENSG00000069493	CLEC2D	-0.73342	4.69646	-2.24765	0.0270408	0.0871656	-4.09197
ENSG00000069509	FUNDC1	0.132129	2.19032	0.333287	0.739692	0.84411	-6.23215
ENSG00000069535	MAOB	-1.4235	1.53713	-4.00115	0.000129126	0.00187593	0.910831
ENSG00000069667	RORA	0.131107	4.42598	0.565899	0.57287	0.72162	-6.33237
ENSG00000069696	DRD4	0.026159	0.217956	0.0609862	0.951505	0.973989	-6.25991
ENSG00000069702	TGFBR3	-1.32632	1.44934	-3.85866	0.000214029	0.00266351	0.454723
ENSG00000069764	PLA2G10	-0.960484	3.40498	-3.23284	0.00171346	0.0119898	-1.52274
ENSG00000069812	HES2	0.0122268	0.533311	0.0385457	0.969338	0.984098	-6.24373
ENSG00000069849	ATP1B3	-0.0750618	4.82743	-0.272068	0.786193	0.875909	-6.50627
ENSG00000069869	NEDD4	-1.24226	6.85161	-4.9975	2.84e-06	0.000136508	4.21351
ENSG00000069943	PIGB	-1.65504	4.30361	-5.13145	1.64e-06	8.96e-05	4.89519
ENSG00000069956	MAPK6	-0.473728	4.52405	-2.33245	0.0219065	0.0748097	-3.89436
ENSG00000069966	GNB5	-0.0538286	2.82517	-0.202745	0.839792	0.909953	-6.30787
ENSG00000069974	RAB27A	-0.212988	4.44731	-0.842545	0.401716	0.576575	-6.14509
ENSG00000069998	HDHD5	0.634042	0.827841	2.04294	0.0439819	0.124249	-4.27398
ENSG00000070010	UFD1	0.296904	4.25297	1.34563	0.181799	0.336821	-5.58994
ENSG00000070018	LRP6	0.929897	1.89678	2.79453	0.00635084	0.0308022	-2.64285
ENSG00000070019	GUCY2C	0.0590162	-0.183187	0.217781	0.828093	0.9023	-6.24723
ENSG00000070031	SCT	0.508405	-1.1285	1.84896	0.0677452	0.169844	-4.68233
ENSG00000070047	PHRF1	-0.0501242	3.19885	-0.201332	0.840893	0.910385	-6.33635
ENSG00000070061	ELP1	0.122921	3.42971	0.486347	0.627903	0.763784	-6.26839
ENSG00000070081	NUCB2	-1.16283	7.39157	-4.51906	1.88e-05	0.00048245	2.36311
ENSG00000070087	PFN2	-0.593961	6.21604	-3.22039	0.00178152	0.0123293	-1.81462
ENSG00000070159	PTPN3	-1.1355	4.77019	-5.85667	7.6e-08	1.19e-05	7.80183
ENSG00000070182	SPTB	0.1574	-0.48122	0.479326	0.632869	0.766697	-6.17403
ENSG00000070190	DAPP1	-0.284185	4.92915	-1.52183	0.131556	0.269825	-5.41746
ENSG00000070214	SLC44A1	0.451562	2.11654	1.52827	0.129951	0.267602	-5.16637
ENSG00000070269	TMEM260	-0.456081	3.87213	-1.54354	0.126206	0.261897	-5.27017
ENSG00000070366	SMG6	0.167722	4.22442	0.686819	0.493962	0.658535	-6.24029
ENSG00000070367	EXOC5	0.28647	4.64404	1.26024	0.210839	0.372786	-5.73847
ENSG00000070371	CLTCL1	0.51867	0.36305	1.55504	0.123445	0.257863	-5.09998
ENSG00000070388	FGF22	0.891093	-1.51564	3.84789	0.000222258	0.00274923	0.362064
ENSG00000070404	FSTL3	0.971212	-1.06318	3.64136	0.000452493	0.00460695	-0.276428
ENSG00000070413	DGCR2	-0.333346	3.12517	-1.33054	0.1867	0.343186	-5.49246
ENSG00000070423	RNF126	-0.446479	3.126	-1.48899	0.139985	0.280896	-5.26823
ENSG00000070444	MNT	0.5458	3.06265	1.46412	0.146644	0.28972	-5.31711
ENSG00000070476	ZXDC	-0.0596118	2.77114	-0.273027	0.785457	0.875625	-6.28818
ENSG00000070495	JMJD6	-0.472913	3.02805	-1.3092	0.193799	0.351702	-5.50043
ENSG00000070501	POLB	-0.0609746	4.79077	-0.263697	0.792616	0.879957	-6.50211
ENSG00000070526	ST6GALNAC1	-0.73363	5.27776	-2.45735	0.0159124	0.0597105	-3.69466
ENSG00000070540	WIPI1	-0.370613	4.73005	-1.45326	0.149627	0.293738	-5.49713
ENSG00000070601	FRMPD1	0.197582	-0.682181	0.631254	0.529474	0.686951	-6.10384
ENSG00000070610	GBA2	-0.68935	4.26775	-2.86748	0.00515235	0.0265835	-2.59062
ENSG00000070614	NDST1	0.0577901	2.99045	0.226615	0.821237	0.898894	-6.32215
ENSG00000070669	ASNS	-0.202072	2.93127	-0.573078	0.568021	0.717606	-6.16642
ENSG00000070718	AP3M2	-0.0144905	3.36227	-0.0442779	0.964781	0.980928	-6.37135
ENSG00000070729	CNGB1	-0.0920403	-0.00842125	-0.205194	0.837884	0.908926	-6.24257
ENSG00000070731	ST6GALNAC2	-1.58761	3.96723	-4.73227	8.2e-06	0.000271154	3.39527
ENSG00000070748	CHAT	0.545773	-1.35332	2.25693	0.0264318	0.0857707	-3.91089
ENSG00000070756	PABPC1	0.36991	8.15257	2.38342	0.0192535	0.0683837	-4.13835
ENSG00000070759	TESK2	0.246226	0.857599	0.725076	0.470286	0.637859	-5.99769
ENSG00000070761	CFAP20	-1.0058	3.78864	-2.9494	0.00405644	0.022406	-2.32814
ENSG00000070770	CSNK2A2	0.0868301	4.06952	0.439286	0.661507	0.78852	-6.35298
ENSG00000070778	PTPN21	-0.174239	2.72246	-0.506962	0.613421	0.752286	-6.18319
ENSG00000070785	EIF2B3	0.331985	3.45743	1.18962	0.237323	0.403292	-5.70285
ENSG00000070814	TCOF1	1.20131	2.97574	3.39541	0.00102118	0.0082435	-1.04654
ENSG00000070831	CDC42	-0.222446	7.06193	-1.8489	0.0677531	0.169844	-5.11406
ENSG00000070882	OSBPL3	-0.853399	4.99992	-3.77709	0.00028438	0.00327916	-0.00741452
ENSG00000070950	RAD18	-0.074247	1.58482	-0.202848	0.839712	0.909953	-6.22898
ENSG00000070961	ATP2B1	0.29921	4.52174	1.06472	0.289848	0.463551	-5.94681
ENSG00000071051	NCK2	-0.451335	4.01191	-2.13533	0.0354487	0.106062	-4.24764
ENSG00000071054	MAP4K4	-0.112976	4.6358	-0.485905	0.628215	0.76384	-6.39934
ENSG00000071073	MGAT4A	0.726581	3.64268	2.22147	0.0288262	0.091346	-4.04214
ENSG00000071082	RPL31	0.876746	8.43507	4.84554	5.23e-06	0.000202219	3.51566
ENSG00000071127	WDR1	-0.0037088	6.44188	-0.0220895	0.982425	0.99096	-6.72235
ENSG00000071189	SNX13	-0.336398	4.71845	-1.84076	0.0689502	0.171925	-4.8814
ENSG00000071205	ARHGAP10	0.774622	0.876462	2.20365	0.0300996	0.0943964	-3.96213
ENSG00000071242	RPS6KA2	0.353759	3.0327	1.19768	0.234185	0.399805	-5.65071
ENSG00000071243	ING3	0.540092	2.87774	1.7394	0.085381	0.199348	-4.87863
ENSG00000071246	VASH1	0.596315	1.36936	1.51076	0.134352	0.273783	-5.16845
ENSG00000071282	LMCD1	0.881793	0.608179	2.45219	0.0161276	0.0602838	-3.43118
ENSG00000071462	BUD23	-0.447058	4.85499	-1.68769	0.0949315	0.215213	-5.15342
ENSG00000071537	SEL1L	0.397439	4.09237	1.82898	0.0707123	0.174725	-4.83685
ENSG00000071539	TRIP13	-0.486697	1.67582	-1.3238	0.188919	0.345681	-5.39927
ENSG00000071553	ATP6AP1	-0.193287	4.57839	-0.909589	0.365468	0.541206	-6.10218
ENSG00000071564	TCF3	0.27231	3.9979	0.90203	0.369447	0.544984	-6.04071
ENSG00000071575	TRIB2	0.225014	4.35246	1.06178	0.291176	0.46496	-5.92529
ENSG00000071626	DAZAP1	0.0888364	4.67161	0.534543	0.594283	0.738707	-6.38207
ENSG00000071655	MBD3	0.330926	3.439	1.13747	0.25836	0.427533	-5.75587
ENSG00000071794	HLTF	-0.61547	2.8272	-2.07881	0.0404798	0.116996	-4.25242
ENSG00000071859	FAM50A	0.293871	3.50902	1.05967	0.29213	0.4661	-5.83832
ENSG00000071889	FAM3A	-0.147984	2.65999	-0.428203	0.669526	0.794959	-6.21372
ENSG00000071894	CPSF1	0.0495518	3.85205	0.170305	0.865152	0.92544	-6.41363
ENSG00000071909	MYO3B	0.579874	-1.00372	1.64014	0.104466	0.230241	-5.01803
ENSG00000071967	CYBRD1	0.290605	1.37075	0.851252	0.396887	0.571934	-5.91546
ENSG00000071991	CDH19	0.355619	-0.718763	1.07651	0.284575	0.457847	-5.73485
ENSG00000071994	PDCD2	-0.426209	3.80432	-1.35235	0.179651	0.333858	-5.52441
ENSG00000072041	SLC6A15	1.1013	-1.40113	3.60797	0.000506434	0.00498591	-0.388856
ENSG00000072042	RDH11	0.812528	2.78566	2.65282	0.00943443	0.0408494	-3.02591
ENSG00000072062	PRKACA	0.176721	3.84636	0.791409	0.430785	0.601903	-6.11911
ENSG00000072071	ADGRL1	1.02599	1.49093	3.03558	0.00313885	0.0186602	-2.01113
ENSG00000072080	SPP2	-1.32861	2.86449	-2.3279	0.0221582	0.0754335	-3.7389
ENSG00000072110	ACTN1	-0.157491	5.21557	-0.687815	0.493337	0.65813	-6.35203
ENSG00000072121	ZFYVE26	-0.209988	3.7667	-0.9557	0.341783	0.517199	-5.96327
ENSG00000072133	RPS6KA6	-1.28535	1.32901	-2.93939	0.0041778	0.0228186	-2.22182
ENSG00000072134	EPN2	-0.875905	4.33826	-2.62691	0.010127	0.042976	-3.19657
ENSG00000072135	PTPN18	-0.518385	4.35686	-1.72169	0.0885603	0.204558	-5.0423
ENSG00000072163	LIMS2	0.379173	-1.15246	1.15266	0.252102	0.420434	-5.68062
ENSG00000072195	SPEG	0.83305	-1.02311	3.47859	0.000778618	0.0067074	-0.769894
ENSG00000072201	LNX1	-0.0620224	3.43844	-0.20294	0.83964	0.909953	-6.36158
ENSG00000072210	ALDH3A2	-0.331639	5.75671	-1.36019	0.177165	0.33085	-5.73845
ENSG00000072274	TFRC	0.32234	5.3606	1.35842	0.177723	0.331439	-5.69354
ENSG00000072310	SREBF1	-0.276714	5.15632	-1.05451	0.294472	0.468733	-6.03062
ENSG00000072364	AFF4	-0.0763631	5.25518	-0.485754	0.628322	0.76384	-6.47275
ENSG00000072401	UBE2D1	0.358532	3.96414	1.38553	0.169312	0.320825	-5.50027
ENSG00000072415	MPP5	-0.45431	3.29416	-1.93817	0.0557348	0.147923	-4.55683
ENSG00000072422	RHOBTB1	-0.239542	1.80918	-0.717971	0.474634	0.641415	-6.00022
ENSG00000072501	SMC1A	0.405273	3.39249	1.8456	0.0682368	0.170716	-4.74
ENSG00000072506	HSD17B10	-1.10651	3.19119	-3.32521	0.00127951	0.00969358	-1.23519
ENSG00000072518	MARK2	-0.220669	4.88096	-1.20099	0.232906	0.398594	-5.83721
ENSG00000072571	HMMR	1.02453	-0.527518	3.29692	0.00140002	0.0103718	-1.28456
ENSG00000072609	CHFR	0.231196	4.8639	1.19442	0.235452	0.401243	-5.84063
ENSG00000072657	TRHDE	0.231382	-1.1835	1.21589	0.227207	0.392361	-5.61215
ENSG00000072682	P4HA2	-0.602887	3.76574	-1.8758	0.0639228	0.16288	-4.71635
ENSG00000072694	FCGR2B	-0.136653	1.93842	-0.262445	0.793578	0.880548	-6.22605
ENSG00000072736	NFATC3	-0.0107133	4.27333	-0.0590646	0.953032	0.97441	-6.47231
ENSG00000072756	TRNT1	-0.638334	3.80583	-2.17018	0.0326253	0.099985	-4.15556
ENSG00000072778	ACADVL	-0.156693	6.47865	-0.828219	0.409737	0.583275	-6.38696
ENSG00000072786	STK10	-0.197161	4.68525	-0.64649	0.519606	0.679632	-6.31433
ENSG00000072803	FBXW11	-0.421667	4.8385	-1.46507	0.146386	0.28942	-5.49005
ENSG00000072818	ACAP1	-0.0500509	4.10983	-0.137793	0.890711	0.940482	-6.44293
ENSG00000072832	CRMP1	1.37057	-0.921449	5.12167	1.71e-06	9.26e-05	4.90152
ENSG00000072840	EVC	0.35309	-0.03938	1.28465	0.20221	0.36208	-5.46714
ENSG00000072849	DERL2	-0.333726	3.67338	-1.17504	0.243077	0.40959	-5.73491
ENSG00000072858	SIDT1	-1.11282	4.50451	-3.41631	0.000954282	0.00786539	-1.08069
ENSG00000072864	NDE1	-0.299292	4.38509	-1.12419	0.263921	0.433773	-5.86497
ENSG00000072952	MRVI1	-0.344069	1.11753	-0.856639	0.393918	0.568803	-5.88481
ENSG00000072954	TMEM38A	0.104266	-0.00749084	0.280282	0.779904	0.871745	-6.22703
ENSG00000072958	AP1M1	0.0798957	3.60296	0.298542	0.765977	0.862452	-6.35231
ENSG00000073008	PVR	0.165895	0.330075	0.527769	0.598958	0.742154	-6.12072
ENSG00000073050	XRCC1	0.228518	2.58139	0.786403	0.433696	0.604888	-6.00841
ENSG00000073060	SCARB1	1.43164	1.4162	4.84669	5.21e-06	0.000202219	3.86037
ENSG00000073067	CYP2W1	0.606149	-0.240537	1.82568	0.0712138	0.175587	-4.67624
ENSG00000073111	MCM2	0.875432	1.48294	2.70847	0.00808969	0.0365429	-2.83813
ENSG00000073150	PANX2	-0.2202	1.07261	-0.696552	0.487877	0.652918	-6.00844
ENSG00000073169	SELENOO	0.482816	2.15955	1.76895	0.0802881	0.191047	-4.78758
ENSG00000073282	TP63	1.90369	2.00283	4.63079	1.22e-05	0.000362713	3.05612
ENSG00000073331	ALPK1	-0.748981	5.16341	-3.67202	0.000407807	0.00425229	-0.355634
ENSG00000073350	LLGL2	-0.185155	5.26289	-0.9196	0.360239	0.535688	-6.17321
ENSG00000073417	PDE8A	-0.0347418	4.1205	-0.133272	0.894276	0.941807	-6.45099
ENSG00000073464	CLCN4	0.0468654	-0.660448	0.202597	0.839907	0.909953	-6.27851
ENSG00000073536	NLE1	0.25153	0.118616	0.753957	0.452842	0.622435	-5.98572
ENSG00000073578	SDHA	-0.630549	6.32634	-3.2726	0.00151204	0.0110126	-1.67426
ENSG00000073584	SMARCE1	0.120073	4.88219	0.637494	0.525421	0.684053	-6.34459
ENSG00000073605	GSDMB	-0.552814	4.33902	-1.63362	0.10583	0.232403	-5.18058
ENSG00000073614	KDM5A	-0.100666	4.95098	-0.485871	0.628239	0.76384	-6.43757
ENSG00000073711	PPP2R3A	0.173923	1.52518	0.529397	0.597833	0.741	-6.12298
ENSG00000073712	FERMT2	-0.524836	1.64133	-1.27772	0.204633	0.364945	-5.45515
ENSG00000073734	ABCB11	-1.42169	2.34	-3.55092	0.00061296	0.00569619	-0.530835
ENSG00000073737	DHRS9	-0.706216	6.4876	-4.03859	0.000112861	0.00170612	0.734472
ENSG00000073756	PTGS2	-0.0543701	4.4329	-0.127066	0.899172	0.94439	-6.48246
ENSG00000073792	IGF2BP2	-0.571127	4.89049	-2.0434	0.0439348	0.124202	-4.52639
ENSG00000073803	MAP3K13	-0.0952734	5.23215	-0.619481	0.537164	0.693199	-6.39648
ENSG00000073849	ST6GAL1	-0.278566	5.79534	-1.53674	0.127864	0.264468	-5.49298
ENSG00000073861	TBX21	1.20521	-0.616628	3.38445	0.00105796	0.00845934	-1.03413
ENSG00000073910	FRY	0.575698	2.20374	1.55876	0.122561	0.256617	-5.14214
ENSG00000073921	PICALM	-0.492551	6.87286	-2.71774	0.00788367	0.0358095	-3.22883
ENSG00000073969	NSF	0.345596	4.95917	1.762	0.0814628	0.193002	-5.04334
ENSG00000074047	GLI2	0.136809	0.385457	0.316468	0.75238	0.853207	-6.2029
ENSG00000074054	CLASP1	-0.640064	4.80451	-2.66766	0.00905735	0.0396262	-3.14874
ENSG00000074071	MRPS34	0.122128	2.53874	0.325243	0.745752	0.849078	-6.2498
ENSG00000074181	NOTCH3	0.590655	1.49795	1.81121	0.0734434	0.179526	-4.7117
ENSG00000074201	CLNS1A	-0.0061572	5.65974	-0.0239414	0.980952	0.990067	-6.63744
ENSG00000074219	TEAD2	1.27989	-1.22152	3.97776	0.000140398	0.00198861	0.797919
ENSG00000074266	EED	-0.256275	3.26033	-0.896293	0.372487	0.547816	-5.96431
ENSG00000074276	CDHR2	0.651335	-0.477511	1.8219	0.0717898	0.176404	-4.69427
ENSG00000074319	TSG101	-0.490967	5.16774	-2.18333	0.0316123	0.0976733	-4.27755
ENSG00000074356	NCBP3	-0.176904	3.65809	-0.799211	0.426271	0.597717	-6.09229
ENSG00000074370	ATP2A3	-0.455677	4.69303	-1.49538	0.138312	0.278655	-5.42994
ENSG00000074410	CA12	-0.758958	2.79417	-2.01803	0.0465647	0.129538	-4.3836
ENSG00000074416	MGLL	-0.685344	4.7714	-3.05381	0.00297122	0.0179301	-2.14565
ENSG00000074527	NTN4	-0.187606	3.53041	-0.619854	0.536919	0.693102	-6.19736
ENSG00000074582	BCS1L	-0.247983	2.39529	-0.5697	0.5703	0.719709	-6.13847
ENSG00000074590	NUAK1	1.29628	0.596199	3.39115	0.00103531	0.00834048	-1.0063
ENSG00000074603	DPP8	0.238543	3.98554	1.05073	0.296196	0.470939	-5.8999
ENSG00000074621	SLC24A1	0.0487382	3.94079	0.175858	0.860801	0.92274	-6.41666
ENSG00000074657	ZNF532	0.110397	4.578	0.469414	0.639908	0.771578	-6.39992
ENSG00000074660	SCARF1	0.308807	1.12021	0.693529	0.489763	0.65464	-6.02429
ENSG00000074695	LMAN1	-0.200855	4.76541	-0.818279	0.415358	0.587859	-6.20377
ENSG00000074696	HACD3	-0.465283	4.47127	-2.74702	0.00726321	0.0337769	-2.92171
ENSG00000074706	IPCEF1	-0.470984	2.08057	-1.02779	0.306803	0.481681	-5.75144
ENSG00000074755	ZZEF1	-0.434212	4.55823	-2.32201	0.0224884	0.0762291	-3.92176
ENSG00000074800	ENO1	-0.243761	6.38016	-1.3543	0.179029	0.333155	-5.81215
ENSG00000074803	SLC12A1	0.546802	-1.33805	1.74137	0.0850334	0.198668	-4.87567
ENSG00000074842	MYDGF	-1.19503	2.57514	-3.33812	0.00122779	0.00942357	-1.16845
ENSG00000074855	ANO8	1.11528	0.20047	3.83619	0.000231546	0.00281902	0.36019
ENSG00000074935	TUBE1	-0.775006	3.93609	-2.45812	0.0158806	0.0596186	-3.55091
ENSG00000074964	ARHGEF10L	-0.0143254	2.60588	-0.0423684	0.966299	0.981802	-6.31304
ENSG00000074966	TXK	0.1763	0.559502	0.438671	0.661951	0.788857	-6.15257
ENSG00000075035	WSCD2	0.73156	-1.62234	2.82361	0.0058455	0.0291777	-2.60676
ENSG00000075073	TACR2	-0.0547144	0.64175	-0.180718	0.856995	0.920419	-6.23001
ENSG00000075089	ACTR6	-1.06748	4.01894	-3.15857	0.00215848	0.0142272	-1.78333
ENSG00000075131	TIPIN	0.00456933	1.15072	0.0130404	0.989624	0.994455	-6.25233
ENSG00000075142	SRI	-0.382856	6.1507	-1.98388	0.0503153	0.136952	-4.77416
ENSG00000075151	EIF4G3	-0.884495	5.38163	-5.93499	5.4e-08	9.32e-06	8.1059
ENSG00000075188	NUP37	-0.427635	2.85649	-1.1365	0.258765	0.427759	-5.68688
ENSG00000075213	SEMA3A	-0.582984	2.50786	-1.71579	0.089639	0.206468	-4.8796
ENSG00000075218	GTSE1	0.646964	0.24523	2.21299	0.0294263	0.0927889	-3.94484
ENSG00000075223	SEMA3C	-0.584514	4.9411	-2.2618	0.026117	0.0850863	-4.09364
ENSG00000075234	TTC38	-0.869458	3.2473	-2.58404	0.0113747	0.0468763	-3.19627
ENSG00000075239	ACAT1	-1.319	4.6596	-4.82707	5.63e-06	0.00020802	3.70812
ENSG00000075240	GRAMD4	-0.082277	3.23328	-0.239941	0.810921	0.892127	-6.33268
ENSG00000075275	CELSR1	-0.492133	4.23677	-2.04554	0.0437193	0.123699	-4.45297
ENSG00000075292	ZNF638	-0.469077	6.46012	-2.56799	0.0118765	0.0482772	-3.55533
ENSG00000075303	SLC25A40	0.1207	3.32601	0.407871	0.684336	0.805257	-6.28679
ENSG00000075336	TIMM21	-0.185897	1.89692	-0.439861	0.661092	0.788179	-6.17531
ENSG00000075340	ADD2	0.702129	0.15443	2.15013	0.034225	0.103438	-4.06541
ENSG00000075391	RASAL2	-0.252005	3.51267	-0.984934	0.327296	0.502933	-5.91686
ENSG00000075399	VPS9D1	-0.00166094	3.39782	-0.00416192	0.996688	0.998271	-6.38564
ENSG00000075407	ZNF37A	-0.390776	3.51804	-1.83522	0.0697752	0.173402	-4.76658
ENSG00000075413	MARK3	-0.293866	5.69199	-1.71588	0.0896226	0.206459	-5.20104
ENSG00000075415	SLC25A3	0.258181	6.30582	1.50989	0.134572	0.274056	-5.58701
ENSG00000075420	FNDC3B	-0.368377	6.07365	-1.70648	0.0913663	0.209505	-5.25681
ENSG00000075426	FOSL2	0.0378883	4.50251	0.145904	0.884323	0.93645	-6.4894
ENSG00000075429	CACNG5	1.08614	-1.42661	5.1666	1.42e-06	8.18e-05	5.07035
ENSG00000075539	FRYL	-0.434422	5.56528	-2.31723	0.0227588	0.0769352	-4.03576
ENSG00000075568	TMEM131	-0.36786	5.21191	-1.75866	0.0820328	0.193984	-5.07729
ENSG00000075618	FSCN1	0.924761	1.20315	2.43047	0.0170621	0.0627612	-3.48058
ENSG00000075624	ACTB	0.139837	10.0796	1.11771	0.266662	0.43703	-6.44476
ENSG00000075643	MOCOS	0.267396	1.18137	0.942	0.348713	0.52406	-5.82205
ENSG00000075651	PLD1	-0.709133	4.7227	-2.85006	0.00541794	0.0276064	-2.68331
ENSG00000075673	ATP12A	-0.221222	3.00594	-0.580473	0.563046	0.714071	-6.17772
ENSG00000075702	WDR62	0.31298	-0.0102218	1.04392	0.299318	0.474431	-5.73673
ENSG00000075711	DLG1	-0.215474	5.87448	-1.184	0.239529	0.40557	-5.9691
ENSG00000075785	RAB7A	-0.115871	6.3043	-0.755502	0.45192	0.621584	-6.42458
ENSG00000075790	BCAP29	0.679248	4.04714	2.11457	0.03723	0.110066	-4.29975
ENSG00000075826	SEC31B	1.11388	0.560671	3.29816	0.00139453	0.0103409	-1.26979
ENSG00000075856	SART3	-0.394227	4.37657	-1.69888	0.0927951	0.211775	-5.08246
ENSG00000075884	ARHGAP15	-0.340658	4.54614	-0.771842	0.442229	0.612415	-6.21052
ENSG00000075886	TUBA3D	0.588346	-0.352704	1.57941	0.117748	0.250073	-5.0827
ENSG00000075914	EXOSC7	-0.321344	3.169	-0.933625	0.352994	0.528509	-5.92452
ENSG00000075945	KIFAP3	-0.384107	3.41503	-1.37128	0.173697	0.326412	-5.45956
ENSG00000075975	MKRN2	0.439271	2.51782	1.62463	0.107738	0.235459	-5.04557
ENSG00000076003	MCM6	1.55666	0.835058	4.62159	1.27e-05	0.000370937	3.0375
ENSG00000076043	REXO2	-0.135957	4.52262	-0.389803	0.697603	0.814789	-6.43158
ENSG00000076053	RBM7	0.539243	3.76001	1.78168	0.0781733	0.187702	-4.87829
ENSG00000076067	RBMS2	-0.575482	4.90526	-2.04316	0.0439595	0.124229	-4.52985
ENSG00000076108	BAZ2A	-0.138309	5.67826	-0.805027	0.422925	0.594771	-6.3177
ENSG00000076201	PTPN23	-0.0444439	3.03358	-0.161116	0.872363	0.929788	-6.33067
ENSG00000076242	MLH1	0.0171507	4.20814	0.0925846	0.926439	0.959612	-6.46208
ENSG00000076248	UNG	0.127462	1.09979	0.389881	0.697545	0.81478	-6.17067
ENSG00000076258	FMO4	-0.337079	1.70403	-0.840893	0.402635	0.577325	-5.91156
ENSG00000076321	KLHL20	-0.102585	2.93866	-0.354245	0.723984	0.8318	-6.26887
ENSG00000076344	RGS11	0.83897	-1.55636	3.38813	0.00104546	0.00838514	-1.05639
ENSG00000076351	SLC46A1	-0.533686	1.8492	-1.50629	0.135493	0.275082	-5.16272
ENSG00000076356	PLXNA2	0.047566	2.8554	0.137635	0.890837	0.940554	-6.32123
ENSG00000076382	SPAG5	0.0608383	2.31766	0.165459	0.868953	0.927359	-6.30761
ENSG00000076513	ANKRD13A	0.0732698	5.1964	0.449267	0.654318	0.783048	-6.48189
ENSG00000076554	TPD52	0.347164	5.4486	1.81277	0.0731992	0.178982	-5.00855
ENSG00000076555	ACACB	-0.946833	3.74099	-3.46338	0.000818454	0.00694958	-0.875377
ENSG00000076604	TRAF4	-0.976344	5.76914	-3.84941	0.000221082	0.00273881	0.163565
ENSG00000076641	PAG1	0.180811	2.48302	0.383597	0.702181	0.817169	-6.23178
ENSG00000076650	GPATCH1	0.424142	1.53039	1.35162	0.179884	0.334072	-5.38342
ENSG00000076662	ICAM3	0.0894111	2.09747	0.197722	0.843708	0.912341	-6.26402
ENSG00000076685	NT5C2	-0.420915	6.7059	-2.60635	0.010709	0.0447972	-3.48686
ENSG00000076706	MCAM	0.257221	0.357475	0.636828	0.525852	0.684223	-6.05711
ENSG00000076716	GPC4	0.100268	1.04397	0.340493	0.734278	0.839442	-6.19066
ENSG00000076770	MBNL3	0.646287	2.61567	1.89953	0.0606959	0.156904	-4.5957
ENSG00000076826	CAMSAP3	-0.00921093	1.19722	-0.026659	0.978791	0.989164	-6.25809
ENSG00000076864	RAP1GAP	-0.946376	1.97237	-2.9768	0.00374084	0.0211504	-2.13788
ENSG00000076924	XAB2	0.401507	2.36959	1.50189	0.136625	0.276459	-5.21261
ENSG00000076928	ARHGEF1	-0.085687	5.00286	-0.374381	0.709001	0.822134	-6.48962
ENSG00000076944	STXBP2	-0.0966882	5.40386	-0.384407	0.701584	0.816591	-6.53298
ENSG00000076984	MAP2K7	0.17707	2.45727	0.574264	0.567221	0.717314	-6.14045
ENSG00000077044	DGKD	0.255556	4.03564	0.729263	0.467734	0.635764	-6.19262
ENSG00000077063	CTTNBP2	0.151204	0.224008	0.376929	0.707113	0.820928	-6.18673
ENSG00000077092	RARB	0.561761	3.02622	1.57535	0.118682	0.251502	-5.15754
ENSG00000077097	TOP2B	-0.0605497	5.15839	-0.350995	0.726412	0.833714	-6.51832
ENSG00000077147	TM9SF3	-0.288996	5.40612	-1.59581	0.114035	0.244528	-5.36213
ENSG00000077150	NFKB2	0.51115	4.2124	1.39621	0.166084	0.316243	-5.51046
ENSG00000077152	UBE2T	-0.087754	0.083729	-0.221445	0.825247	0.900939	-6.23565
ENSG00000077157	PPP1R12B	-0.582299	5.02597	-2.63742	0.00984065	0.0421537	-3.24392
ENSG00000077232	DNAJC10	-0.593507	5.14052	-2.85572	0.00533038	0.0272297	-2.70968
ENSG00000077235	GTF3C1	-0.749507	4.17804	-2.91218	0.00452464	0.0241973	-2.46742
ENSG00000077238	IL4R	0.0521489	4.64314	0.139464	0.889395	0.939455	-6.50672
ENSG00000077254	USP33	-0.298129	5.64205	-1.71115	0.0904973	0.208007	-5.20341
ENSG00000077264	PAK3	1.47084	-1.06415	4.4363	2.58e-05	0.000606889	2.36825
ENSG00000077312	SNRPA	-0.0842961	3.82548	-0.310205	0.757122	0.856081	-6.37244
ENSG00000077327	SPAG6	-0.773987	6.02166	-3.18695	0.00197703	0.0133445	-1.89211
ENSG00000077348	EXOSC5	-0.205368	0.200375	-0.539381	0.590955	0.736035	-6.1118
ENSG00000077380	DYNC1I2	0.177093	4.9121	0.70166	0.484701	0.650684	-6.30414
ENSG00000077420	APBB1IP	0.313694	3.04429	0.745239	0.458068	0.627306	-6.07266
ENSG00000077454	LRCH4	-0.205723	4.76009	-1.1199	0.265736	0.435931	-5.91468
ENSG00000077458	FAM76B	0.288246	4.1054	1.03237	0.304664	0.479614	-5.93169
ENSG00000077463	SIRT6	0.442471	1.67657	1.31561	0.191645	0.348951	-5.43457
ENSG00000077498	TYR	-0.19476	-0.898777	-0.755844	0.451716	0.62146	-6.03777
ENSG00000077514	POLD3	-0.567896	4.58897	-2.20889	0.0297202	0.0934927	-4.16104
ENSG00000077549	CAPZB	0.108612	6.10099	0.808309	0.421043	0.592989	-6.36106
ENSG00000077585	GPR137B	-0.125413	3.55335	-0.334644	0.738672	0.8433	-6.33199
ENSG00000077616	NAALAD2	0.80947	-0.765441	2.60113	0.0108615	0.0452961	-3.11242
ENSG00000077684	JADE1	-0.482333	3.27018	-2.03195	0.045106	0.126575	-4.37878
ENSG00000077713	SLC25A43	0.0375065	1.42978	0.102469	0.918612	0.954587	-6.25121
ENSG00000077721	UBE2A	-0.136727	4.95649	-0.48703	0.627421	0.763254	-6.43724
ENSG00000077782	FGFR1	0.627074	1.59951	1.36701	0.175027	0.328053	-5.36867
ENSG00000077800	FKBP6	-0.943663	1.84365	-2.53938	0.0128203	0.0510262	-3.21963
ENSG00000077935	SMC1B	0.961098	-1.56364	4.11233	8.64e-05	0.00141588	1.23399
ENSG00000077942	FBLN1	-0.49548	2.96784	-2.04689	0.0435839	0.123542	-4.34506
ENSG00000077984	CST7	-0.554327	1.15398	-1.03776	0.30216	0.477276	-5.70984
ENSG00000078018	MAP2	1.17694	0.114696	3.09529	0.0026203	0.0163602	-1.83672
ENSG00000078043	PIAS2	-0.11422	4.15921	-0.440793	0.66042	0.787797	-6.37053
ENSG00000078053	AMPH	0.624053	-0.894485	1.49151	0.139324	0.279979	-5.23584
ENSG00000078061	ARAF	-0.0151564	3.49206	-0.0658819	0.947618	0.97205	-6.3826
ENSG00000078070	MCCC1	-0.910573	3.53559	-3.07077	0.00282278	0.017263	-1.98425
ENSG00000078081	LAMP3	-0.226758	3.97036	-0.826129	0.410915	0.584546	-6.10464
ENSG00000078098	FAP	-0.636973	-0.306598	-1.21032	0.229322	0.394601	-5.57221
ENSG00000078114	NEBL	-0.706046	5.93739	-3.00421	0.00344792	0.0199495	-2.39274
ENSG00000078124	ACER3	0.709282	2.55651	2.16947	0.0326809	0.100099	-4.08455
ENSG00000078140	UBE2K	0.121954	4.83588	0.653487	0.515108	0.676012	-6.32708
ENSG00000078142	PIK3C3	-0.0847871	4.9281	-0.394777	0.693941	0.812136	-6.47349
ENSG00000078177	N4BP2	1.07165	1.94825	3.898	0.000186367	0.00243376	0.53997
ENSG00000078237	TIGAR	0.130488	0.659232	0.32961	0.74246	0.846153	-6.1929
ENSG00000078246	TULP3	0.122067	2.88645	0.407194	0.684832	0.805725	-6.25084
ENSG00000078269	SYNJ2	0.0896424	2.96168	0.371884	0.710853	0.82323	-6.27185
ENSG00000078295	ADCY2	-0.920532	3.62011	-2.45774	0.0158964	0.0596644	-3.51864
ENSG00000078304	PPP2R5C	-0.323574	6.63829	-1.97123	0.0517676	0.13984	-4.84801
ENSG00000078328	RBFOX1	0.727382	2.34693	2.00148	0.0483514	0.133153	-4.40899
ENSG00000078369	GNB1	0.135554	6.22961	0.949531	0.344892	0.520608	-6.25232
ENSG00000078401	EDN1	1.32968	-0.668318	3.87763	0.000200231	0.00254391	0.482308
ENSG00000078403	MLLT10	-0.571999	4.54393	-1.97303	0.0515593	0.139436	-4.62201
ENSG00000078487	ZCWPW1	-0.378118	2.43427	-1.0933	0.27718	0.448885	-5.70493
ENSG00000078579	FGF20	1.26162	-1.58178	4.81677	5.87e-06	0.000213369	3.74077
ENSG00000078589	P2RY10	0.207252	1.93772	0.52481	0.601005	0.743582	-6.14089
ENSG00000078596	ITM2A	-0.762208	0.313745	-2.0458	0.0436932	0.123689	-4.26008
ENSG00000078618	NRDC	-0.48135	5.86084	-3.25543	0.00159614	0.0114273	-1.68118
ENSG00000078668	VDAC3	-0.315885	5.24173	-1.48648	0.140646	0.281938	-5.50714
ENSG00000078674	PCM1	-0.713154	7.17705	-3.82411	0.000241513	0.00290418	-0.0398751
ENSG00000078687	TNRC6C	-0.0707978	2.83757	-0.260545	0.795038	0.881353	-6.29403
ENSG00000078699	CBFA2T2	0.227722	2.84265	1.06297	0.290637	0.464441	-5.78085
ENSG00000078747	ITCH	-0.396764	5.07805	-2.33706	0.0216536	0.0741695	-3.94313
ENSG00000078795	PKD2L2	-1.13041	0.356933	-3.61133	0.000500755	0.00494737	-0.331744
ENSG00000078804	TP53INP2	0.275814	4.39961	1.29838	0.197473	0.356047	-5.6627
ENSG00000078808	SDF4	0.0435294	4.40969	0.212733	0.832016	0.904718	-6.46726
ENSG00000078814	MYH7B	-0.399386	1.11957	-1.11428	0.268124	0.438812	-5.64053
ENSG00000078898	BPIFB2	0.757935	-0.479246	1.55257	0.124033	0.258631	-5.12228
ENSG00000078900	TP73	-0.752884	3.24306	-2.53332	0.0130289	0.0516575	-3.31483
ENSG00000078902	TOLLIP	-0.476275	3.4751	-1.89893	0.060776	0.157033	-4.64147
ENSG00000078967	UBE2D4	-1.03717	4.53971	-2.79976	0.0062572	0.0304994	-2.79413
ENSG00000079101	CLUL1	0.563562	-0.93712	1.62066	0.108587	0.23659	-5.04439
ENSG00000079102	RUNX1T1	0.807142	-1.15177	2.2364	0.0277961	0.0889237	-3.94052
ENSG00000079112	CDH17	-0.0306769	-0.189478	-0.101616	0.919288	0.954824	-6.26839
ENSG00000079134	THOC1	-0.147248	4.01261	-0.418164	0.676822	0.80032	-6.35742
ENSG00000079150	FKBP7	0.344934	-0.0745045	0.91238	0.364005	0.539724	-5.86333
ENSG00000079156	OSBPL6	-0.647288	3.7661	-2.44994	0.0162224	0.0605554	-3.55159
ENSG00000079215	SLC1A3	-0.154436	1.5388	-0.357289	0.721711	0.830411	-6.18929
ENSG00000079246	XRCC5	-0.284808	5.78998	-1.92296	0.0576451	0.151393	-4.85055
ENSG00000079257	LXN	-0.615555	4.23291	-1.73073	0.0869253	0.201693	-5.01526
ENSG00000079263	SP140	-0.137227	3.54913	-0.280897	0.779434	0.871472	-6.35107
ENSG00000079277	MKNK1	-0.679341	4.29385	-2.11268	0.0373956	0.110476	-4.32287
ENSG00000079308	TNS1	0.221195	4.85434	0.897777	0.371699	0.547271	-6.14439
ENSG00000079313	REXO1	0.00715519	3.09103	0.0240758	0.980845	0.990067	-6.34535
ENSG00000079332	SAR1A	0.363333	4.36467	1.74851	0.0837835	0.196654	-5.00133
ENSG00000079335	CDC14A	-1.37637	4.71126	-5.28877	8.57e-07	5.76e-05	5.49399
ENSG00000079337	RAPGEF3	-0.131089	1.67038	-0.332047	0.740626	0.844659	-6.20019
ENSG00000079385	CEACAM1	-0.251147	3.92562	-0.692106	0.490652	0.655394	-6.19372
ENSG00000079387	SENP1	-0.160875	3.5608	-0.670421	0.504305	0.667103	-6.17289
ENSG00000079432	CIC	-0.230674	3.78938	-1.015	0.312828	0.48876	-5.91424
ENSG00000079435	LIPE	-0.683548	1.73373	-1.8733	0.0642705	0.163538	-4.57532
ENSG00000079459	FDFT1	-0.576181	5.34728	-2.9168	0.00446395	0.0240137	-2.56892
ENSG00000079462	PAFAH1B3	-0.695301	1.261	-1.56274	0.121621	0.255322	-5.05952
ENSG00000079482	OPHN1	-0.747376	2.72818	-2.81218	0.00603956	0.0297656	-2.60765
ENSG00000079616	KIF22	0.834159	2.62762	2.51568	0.0136529	0.0533942	-3.33971
ENSG00000079691	CARMIL1	0.0520658	3.58143	0.2638	0.792537	0.879957	-6.35933
ENSG00000079739	PGM1	-0.135789	2.17068	-0.461156	0.645799	0.776739	-6.17323
ENSG00000079785	DDX1	-0.38817	4.39453	-1.37528	0.172458	0.324871	-5.56365
ENSG00000079805	DNM2	-0.517288	5.86413	-3.48252	0.000768622	0.00664906	-1.00658
ENSG00000079819	EPB41L2	1.40997	2.99855	3.72851	0.000336221	0.00369866	-0.0330634
ENSG00000079841	RIMS1	1.2699	4.30806	3.83281	0.000234296	0.0028445	0.229583
ENSG00000079950	STX7	0.326081	4.53273	1.70313	0.0919934	0.210428	-5.0901
ENSG00000079974	RABL2B	-1.31261	5.62792	-5.30093	8.14e-07	5.56e-05	5.49161
ENSG00000079999	KEAP1	0.253168	3.59775	0.83383	0.406583	0.58055	-6.05597
ENSG00000080007	DDX43	-0.112158	0.270743	-0.303045	0.762555	0.86003	-6.20897
ENSG00000080031	PTPRH	-0.0314176	0.988794	-0.0869679	0.93089	0.962399	-6.2389
ENSG00000080189	SLC35C2	0.0979776	3.33261	0.363319	0.717218	0.827423	-6.30228
ENSG00000080200	CRYBG3	0.492816	2.2873	1.80746	0.0740307	0.180709	-4.74242
ENSG00000080293	SCTR	0.793383	-0.729743	2.30514	0.0234571	0.0787278	-3.77602
ENSG00000080298	RFX3	-0.894083	5.80961	-3.38435	0.00105832	0.00845934	-1.29696
ENSG00000080345	RIF1	0.0236847	3.76065	0.106568	0.915369	0.953141	-6.40873
ENSG00000080371	RAB21	-0.565649	4.33245	-1.97385	0.051464	0.139269	-4.59621
ENSG00000080493	SLC4A4	0.404358	1.58117	1.33398	0.185576	0.341579	-5.41767
ENSG00000080503	SMARCA2	-0.181877	6.95296	-1.04645	0.298154	0.473141	-6.23435
ENSG00000080511	RDH8	0.182516	-1.66027	0.752197	0.453894	0.623672	-6.08452
ENSG00000080546	SESN1	-1.07549	4.2895	-3.83951	0.000228874	0.00280358	0.253954
ENSG00000080561	MID2	0.314066	2.32764	0.977598	0.330892	0.506629	-5.8323
ENSG00000080572	PIH1D3	-0.432294	2.27684	-1.01624	0.312238	0.487978	-5.78002
ENSG00000080603	SRCAP	-1.012	4.31241	-4.69814	9.38e-06	0.000299872	3.24686
ENSG00000080608	PUM3	-0.0469604	3.65369	-0.143985	0.885834	0.937384	-6.39534
ENSG00000080709	KCNN2	0.582033	-0.509532	1.84194	0.0687759	0.171573	-4.65914
ENSG00000080802	CNOT4	0.0134586	4.0904	0.0740363	0.941146	0.968241	-6.44629
ENSG00000080815	PSEN1	-0.303096	4.95285	-1.3839	0.169809	0.321432	-5.61522
ENSG00000080819	CPOX	0.44956	1.00716	1.42414	0.157861	0.304868	-5.27919
ENSG00000080822	CLDND1	1.07362	4.15105	3.51672	0.000686649	0.00614426	-0.754178
ENSG00000080823	MOK	-1.22317	6.07623	-4.98547	2.98e-06	0.000140041	4.22099
ENSG00000080824	HSP90AA1	-0.725167	8.14601	-4.86013	4.93e-06	0.000194572	3.58821
ENSG00000080839	RBL1	0.715967	1.04137	2.03524	0.0447663	0.12588	-4.29087
ENSG00000080845	DLGAP4	-0.135322	4.59465	-0.565201	0.573343	0.721859	-6.35266
ENSG00000080854	IGSF9B	1.13843	-1.16455	4.42908	2.65e-05	0.00061585	2.33973
ENSG00000080986	NDC80	-1.18112	2.01611	-2.54663	0.0125752	0.0502822	-3.19895
ENSG00000081014	AP4E1	0.267131	1.63331	0.902305	0.369302	0.544898	-5.86794
ENSG00000081019	RSBN1	0.632168	2.28454	2.14859	0.0343503	0.103702	-4.10339
ENSG00000081026	MAGI3	-0.0566231	3.32885	-0.227213	0.820773	0.898566	-6.35315
ENSG00000081041	CXCL2	-0.38047	2.69285	-0.685475	0.494805	0.659231	-6.07623
ENSG00000081059	TCF7	-0.274682	3.38442	-0.904254	0.368274	0.543937	-5.97492
ENSG00000081087	OSTM1	-0.807939	3.35408	-2.5505	0.0124456	0.0498858	-3.28288
ENSG00000081138	CDH7	0.838209	-1.33012	3.41279	0.000965236	0.00791986	-0.976727
ENSG00000081148	IMPG2	0.939402	-1.50303	4.90099	4.19e-06	0.000176197	4.05544
ENSG00000081154	PCNP	-0.134408	5.3632	-0.786603	0.43358	0.604823	-6.29648
ENSG00000081177	EXD2	-0.880585	2.60848	-3.04949	0.00301016	0.0180815	-1.9795
ENSG00000081181	ARG2	0.556382	2.07029	1.19013	0.237125	0.403206	-5.59374
ENSG00000081189	MEF2C	0.869906	3.57891	1.85113	0.0674284	0.169288	-4.74451
ENSG00000081237	PTPRC	0.00348749	6.31823	0.0106951	0.99149	0.995435	-6.70849
ENSG00000081277	PKP1	1.72381	0.371778	4.50671	1.97e-05	0.000498208	2.62442
ENSG00000081307	UBA5	-0.643838	4.21693	-2.41776	0.0176308	0.0641767	-3.67092
ENSG00000081320	STK17B	0.102005	5.83374	0.449944	0.653832	0.782634	-6.55427
ENSG00000081377	CDC14B	0.160144	4.30191	0.561477	0.575867	0.723915	-6.32934
ENSG00000081386	ZNF510	0.502914	1.87723	1.63434	0.105679	0.232166	-4.99801
ENSG00000081479	LRP2	0.74908	-0.797727	2.45605	0.0159667	0.0598377	-3.44862
ENSG00000081665	ZNF506	-0.797907	4.1828	-3.32718	0.00127147	0.00964158	-1.31701
ENSG00000081692	JMJD4	0.234736	0.671184	0.735341	0.464043	0.63253	-5.98398
ENSG00000081721	DUSP12	-1.13367	1.8056	-3.02731	0.00321771	0.0189709	-1.99836
ENSG00000081760	AACS	-0.787518	3.49913	-2.48679	0.0147335	0.0565813	-3.44669
ENSG00000081791	DELE1	0.22385	3.54261	0.904959	0.367902	0.543535	-5.99503
ENSG00000081803	CADPS2	0.684824	2.29648	2.28082	0.0249185	0.0822526	-3.8442
ENSG00000081818	PCDHB4	1.02163	-1.60851	4.83569	5.44e-06	0.000203751	3.8095
ENSG00000081870	HSPB11	-0.530992	5.48753	-2.3789	0.0194765	0.0689815	-3.89301
ENSG00000081913	PHLPP1	-0.925299	4.06274	-3.50415	0.000715773	0.00631528	-0.777746
ENSG00000081923	ATP8B1	-0.178397	3.98098	-0.697371	0.487367	0.652662	-6.21049
ENSG00000081985	IL12RB2	0.50671	0.377899	1.31833	0.190738	0.347841	-5.41817
ENSG00000082014	SMARCD3	0.0458319	1.21257	0.126411	0.899689	0.944549	-6.24548
ENSG00000082068	WDR70	-0.279539	4.07521	-0.822086	0.413199	0.586271	-6.12051
ENSG00000082074	FYB1	-0.127219	4.99949	-0.331022	0.741397	0.845283	-6.50335
ENSG00000082126	MPP4	-1.02607	1.22203	-3.00723	0.00341699	0.0198461	-2.04748
ENSG00000082146	STRADB	-0.71602	2.0203	-1.89968	0.0606754	0.156897	-4.5334
ENSG00000082153	BZW1	0.147087	6.70151	0.895935	0.372677	0.547875	-6.35154
ENSG00000082196	C1QTNF3	0.443011	-0.436316	1.45476	0.149214	0.293137	-5.26449
ENSG00000082212	ME2	-0.075683	4.24457	-0.47689	0.634596	0.767942	-6.35704
ENSG00000082213	C5orf22	-0.295893	3.53027	-1.0063	0.316968	0.493244	-5.88846
ENSG00000082258	CCNT2	-0.414064	4.34878	-1.6556	0.101284	0.225383	-5.15046
ENSG00000082269	FAM135A	0.0694676	3.6952	0.259875	0.795553	0.881428	-6.37095
ENSG00000082293	COL19A1	1.00743	0.361971	3.04023	0.00309529	0.0184547	-1.9823
ENSG00000082397	EPB41L3	0.590613	2.26777	1.40757	0.162702	0.311611	-5.34383
ENSG00000082438	COBLL1	0.250109	4.36885	1.14211	0.256436	0.425715	-5.84535
ENSG00000082458	DLG3	-0.838	4.68135	-3.08985	0.00266403	0.016589	-2.03686
ENSG00000082482	KCNK2	-0.0811734	-0.550283	-0.261687	0.79416	0.880894	-6.26224
ENSG00000082497	SERTAD4	0.909168	0.883117	2.47741	0.0151001	0.0575314	-3.37411
ENSG00000082512	TRAF5	0.496471	1.90493	1.59895	0.113335	0.243441	-5.05566
ENSG00000082515	MRPL22	-1.49683	2.9645	-4.0436	0.000110842	0.00168962	1.01937
ENSG00000082516	GEMIN5	0.81114	0.525974	2.80258	0.0062071	0.0303364	-2.59309
ENSG00000082641	NFE2L1	-0.268755	5.33467	-1.11581	0.267472	0.438138	-5.98479
ENSG00000082684	SEMA5B	0.798133	-0.975997	2.98669	0.00363255	0.0207167	-2.15665
ENSG00000082701	GSK3B	-0.218781	3.96989	-1.11931	0.265986	0.436183	-5.82526
ENSG00000082781	ITGB5	-0.424339	2.90716	-1.2934	0.199182	0.358299	-5.51572
ENSG00000082805	ERC1	-0.0334567	4.63182	-0.148284	0.88245	0.935291	-6.50636
ENSG00000082898	XPO1	-0.180179	6.3069	-1.08952	0.27883	0.450998	-6.12091
ENSG00000082996	RNF13	-0.134641	5.94226	-0.692189	0.4906	0.655385	-6.43032
ENSG00000083067	TRPM3	0.459472	-0.683839	1.43755	0.154029	0.300063	-5.29875
ENSG00000083093	PALB2	0.169863	1.46576	0.486085	0.628088	0.763839	-6.13866
ENSG00000083097	DOP1A	-0.520926	4.17308	-1.9274	0.0570816	0.150299	-4.66274
ENSG00000083099	LYRM2	-0.458745	4.46845	-1.67731	0.0969497	0.2184	-5.12584
ENSG00000083123	BCKDHB	-0.212313	1.82378	-0.564155	0.574051	0.722387	-6.12294
ENSG00000083168	KAT6A	-0.22938	4.73199	-1.45639	0.148763	0.292426	-5.49111
ENSG00000083223	TUT7	-0.0437005	4.8624	-0.27666	0.782675	0.873771	-6.50613
ENSG00000083290	ULK2	-0.758312	3.40905	-2.16475	0.0330523	0.100889	-4.12826
ENSG00000083307	GRHL2	-0.319256	4.9471	-0.845647	0.399991	0.574941	-6.20124
ENSG00000083312	TNPO1	-0.0356336	5.36984	-0.202298	0.84014	0.909953	-6.58241
ENSG00000083444	PLOD1	0.645029	1.75727	2.37694	0.0195743	0.0691935	-3.61765
ENSG00000083454	P2RX5	2.01659	0.796769	4.42165	2.73e-05	0.000629045	2.3156
ENSG00000083457	ITGAE	0.0415504	3.45661	0.12351	0.901978	0.945742	-6.37744
ENSG00000083520	DIS3	0.0285661	3.33369	0.154752	0.877363	0.93233	-6.35931
ENSG00000083535	PIBF1	-0.217597	4.32467	-0.671335	0.503726	0.666622	-6.25574
ENSG00000083544	TDRD3	-0.359909	3.46918	-1.2922	0.199594	0.358688	-5.57095
ENSG00000083635	NUFIP1	0.854615	-0.143259	3.21717	0.00179952	0.0124095	-1.50227
ENSG00000083642	PDS5B	0.340732	4.09752	1.70955	0.0907935	0.208491	-5.03487
ENSG00000083720	OXCT1	0.136317	2.57186	0.430078	0.668166	0.793747	-6.22923
ENSG00000083750	RRAGB	-0.920643	2.36662	-2.35659	0.020612	0.0717654	-3.64472
ENSG00000083799	CYLD	0.383358	5.16454	2.21993	0.0289343	0.0916355	-4.19744
ENSG00000083807	SLC27A5	-0.717992	1.50305	-2.37033	0.0199059	0.0699884	-3.58969
ENSG00000083812	ZNF324	1.28165	0.520107	4.83918	5.37e-06	0.000202929	3.83849
ENSG00000083814	ZNF671	0.60719	0.353473	1.9248	0.057412	0.150933	-4.48987
ENSG00000083817	ZNF416	0.589566	-0.662814	2.26307	0.026035	0.0849126	-3.8609
ENSG00000083828	ZNF586	-0.396351	3.36897	-1.57321	0.119178	0.252031	-5.17451
ENSG00000083838	ZNF446	0.280779	0.764359	0.917137	0.361521	0.536961	-5.84171
ENSG00000083844	ZNF264	0.0237573	3.37835	0.106196	0.915663	0.953266	-6.36846
ENSG00000083845	RPS5	0.0528338	7.03902	0.251967	0.80164	0.886095	-6.75441
ENSG00000083857	FAT1	-0.0409746	3.50497	-0.131546	0.895637	0.942461	-6.38833
ENSG00000083896	YTHDC1	-0.0912624	5.68989	-0.61155	0.542376	0.697457	-6.45457
ENSG00000083937	CHMP2B	-0.283831	4.14261	-1.14112	0.256848	0.425924	-5.81772
ENSG00000084070	SMAP2	-0.315433	5.2619	-1.34249	0.182813	0.338432	-5.70524
ENSG00000084072	PPIE	-0.149135	3.67086	-0.593104	0.554598	0.708184	-6.23358
ENSG00000084073	ZMPSTE24	-0.615494	3.86412	-2.73278	0.00755905	0.034778	-2.89346
ENSG00000084090	STARD7	0.104351	5.09725	0.655857	0.513589	0.67452	-6.35855
ENSG00000084092	NOA1	0.0210619	2.67144	0.0718295	0.942897	0.969192	-6.30968
ENSG00000084093	REST	0.137906	3.94446	0.725993	0.469726	0.637422	-6.17709
ENSG00000084110	HAL	0.0264708	0.604409	0.0494658	0.960658	0.978036	-6.25123
ENSG00000084112	SSH1	-0.151321	3.57837	-0.571617	0.569006	0.718478	-6.23042
ENSG00000084207	GSTP1	-0.772945	8.44819	-3.67969	0.000397307	0.00416931	-0.612515
ENSG00000084234	APLP2	-0.969527	6.17818	-5.71161	1.42e-07	1.69e-05	7.13257
ENSG00000084444	FAM234B	1.02488	-0.382275	3.84292	0.000226162	0.00278107	0.376908
ENSG00000084453	SLCO1A2	0.0556753	0.327099	0.142536	0.886975	0.937934	-6.24752
ENSG00000084463	WBP11	0.105587	4.34571	0.588822	0.557455	0.710385	-6.30978
ENSG00000084623	EIF3I	0.177506	5.14578	0.980885	0.329278	0.505032	-6.10275
ENSG00000084636	COL16A1	0.512402	1.30653	1.17365	0.243629	0.410394	-5.59092
ENSG00000084652	TXLNA	-0.130771	3.43396	-0.651637	0.516295	0.677096	-6.16784
ENSG00000084676	NCOA1	-0.431165	4.19078	-2.05705	0.042574	0.121359	-4.42352
ENSG00000084693	AGBL5	-0.971654	3.36021	-3.64813	0.000442255	0.00452236	-0.280791
ENSG00000084710	EFR3B	1.21431	-0.259399	3.22306	0.00176673	0.012258	-1.4903
ENSG00000084731	KIF3C	1.39399	-0.5078	4.14347	7.71e-05	0.00130209	1.36329
ENSG00000084733	RAB10	-0.194136	5.40829	-1.1944	0.235457	0.401243	-5.90476
ENSG00000084734	GCKR	-0.397997	-0.31773	-1.25955	0.211087	0.373043	-5.51434
ENSG00000084754	HADHA	-0.274751	4.74666	-1.88782	0.0622701	0.159911	-4.80146
ENSG00000084764	MAPRE3	-0.978409	4.6784	-3.50288	0.000718766	0.00633487	-0.837503
ENSG00000084774	CAD	-0.845465	2.3342	-2.48667	0.0147382	0.056586	-3.35932
ENSG00000085063	CD59	-0.988113	6.93121	-5.06407	2.16e-06	0.000110574	4.46738
ENSG00000085117	CD82	-0.741706	5.52781	-2.66653	0.00908544	0.0397173	-3.22437
ENSG00000085185	BCORL1	0.77047	-0.0543773	2.77341	0.00674272	0.0320563	-2.67293
ENSG00000085224	ATRX	0.0330061	5.73997	0.168853	0.866291	0.926038	-6.63181
ENSG00000085231	AK6	-0.890346	3.34776	-2.01279	0.0471233	0.130671	-4.41221
ENSG00000085265	FCN1	0.843124	0.0243288	2.44242	0.0165421	0.0615386	-3.45407
ENSG00000085274	MYNN	-0.115953	2.33526	-0.401378	0.689093	0.808997	-6.21047
ENSG00000085276	MECOM	-0.243589	5.30143	-1.04349	0.299516	0.47467	-6.06008
ENSG00000085365	SCAMP1	-0.325673	3.84562	-1.24524	0.216274	0.379271	-5.66521
ENSG00000085377	PREP	0.476747	1.71658	1.8223	0.0717293	0.176361	-4.69088
ENSG00000085382	HACE1	0.356733	2.93774	1.20182	0.232585	0.398294	-5.64631
ENSG00000085415	SEH1L	0.818232	3.02273	2.42289	0.0173991	0.0636016	-3.56724
ENSG00000085433	WDR47	-0.666889	2.91764	-2.00243	0.0482463	0.133009	-4.39812
ENSG00000085449	WDFY1	-0.532693	5.431	-2.68821	0.00855756	0.0380795	-3.16083
ENSG00000085465	OVGP1	-0.315373	0.593283	-0.901709	0.369617	0.545073	-5.8532
ENSG00000085491	SLC25A24	0.18923	3.45219	0.742796	0.459538	0.628584	-6.11311
ENSG00000085511	MAP3K4	-0.124292	4.28395	-0.387302	0.699447	0.815375	-6.40152
ENSG00000085514	PILRA	-0.0754948	1.87703	-0.153508	0.878341	0.932886	-6.25448
ENSG00000085552	IGSF9	0.691627	0.378159	2.30298	0.0235839	0.0790565	-3.75193
ENSG00000085563	ABCB1	0.56719	-0.472653	1.50825	0.134993	0.274616	-5.18632
ENSG00000085644	ZNF213	0.109771	0.748398	0.323195	0.747297	0.850237	-6.19929
ENSG00000085662	AKR1B1	-0.595062	3.77088	-1.91262	0.0589752	0.153605	-4.64541
ENSG00000085719	CPNE3	-0.19152	5.02351	-1.12743	0.262558	0.432116	-5.93871
ENSG00000085721	RRN3	0.249976	3.42239	0.881757	0.380256	0.555216	-6.00105
ENSG00000085733	CTTN	-0.345101	5.4406	-1.56518	0.121049	0.254573	-5.41287
ENSG00000085741	WNT11	0.751753	-1.71638	3.40767	0.000981426	0.00800863	-1.00543
ENSG00000085760	MTIF2	0.0559524	3.29436	0.19998	0.841947	0.911117	-6.35031
ENSG00000085788	DDHD2	-0.00264452	3.9724	-0.00965439	0.992318	0.995752	-6.4446
ENSG00000085831	TTC39A	-0.630547	4.15635	-2.132	0.0357294	0.106746	-4.27152
ENSG00000085832	EPS15	-0.000412744	5.25307	-0.0027324	0.997826	0.998928	-6.58926
ENSG00000085840	ORC1	1.10205	-0.804002	4.23099	5.59e-05	0.00104343	1.6569
ENSG00000085871	MGST2	-0.375038	4.02844	-1.1616	0.248469	0.415983	-5.80354
ENSG00000085872	CHERP	-0.46698	3.27801	-1.7966	0.0757525	0.183529	-4.80236
ENSG00000085978	ATG16L1	0.0477514	4.12218	0.153004	0.878737	0.933125	-6.44295
ENSG00000085982	USP40	-0.494221	4.355	-1.52922	0.129716	0.267317	-5.34439
ENSG00000085998	POMGNT1	-0.574232	3.66674	-1.50055	0.136972	0.276997	-5.3126
ENSG00000085999	RAD54L	-0.163646	1.14121	-0.377063	0.707014	0.820871	-6.17115
ENSG00000086015	MAST2	-0.560962	3.59365	-1.82668	0.0710615	0.175376	-4.78548
ENSG00000086061	DNAJA1	-0.522695	6.428	-3.33872	0.00122544	0.0094144	-1.48932
ENSG00000086062	B4GALT1	-0.0877562	4.37672	-0.587908	0.558066	0.710799	-6.3166
ENSG00000086065	CHMP5	-1.09754	5.26058	-5.72744	1.33e-07	1.64e-05	7.2458
ENSG00000086102	NFX1	-0.564927	4.65019	-3.9028	0.00018323	0.00240813	0.431829
ENSG00000086159	AQP6	0.688154	-1.03458	2.54508	0.0126271	0.0504407	-3.25829
ENSG00000086189	DIMT1	-0.762243	4.16178	-2.79106	0.00641385	0.0309867	-2.77661
ENSG00000086200	IPO11	-1.2227	4.28046	-3.89683	0.000187138	0.00243944	0.444863
ENSG00000086205	FOLH1	0.381268	1.11659	0.818729	0.415103	0.587701	-5.93526
ENSG00000086232	EIF2AK1	-0.171425	4.79065	-0.795681	0.42831	0.599466	-6.22336
ENSG00000086288	NME8	0.488602	-1.30233	1.36364	0.176081	0.329576	-5.43231
ENSG00000086289	EPDR1	-0.338793	0.589927	-0.862652	0.39062	0.565486	-5.88402
ENSG00000086300	SNX10	0.93147	3.09539	1.86025	0.0661139	0.166754	-4.69733
ENSG00000086475	SEPHS1	-0.0806503	3.76667	-0.27085	0.787126	0.87677	-6.38639
ENSG00000086504	MRPL28	-0.393178	3.23609	-1.31162	0.192982	0.3508	-5.51545
ENSG00000086544	ITPKC	0.50352	3.06142	1.72924	0.0871938	0.202196	-4.90864
ENSG00000086548	CEACAM6	0.139774	5.3599	0.617973	0.538153	0.694093	-6.41117
ENSG00000086570	FAT2	1.15496	0.633416	3.31066	0.00134022	0.0100284	-1.23896
ENSG00000086589	RBM22	0.310984	4.45793	1.51194	0.13405	0.273333	-5.37818
ENSG00000086598	TMED2	0.0892084	5.28103	0.565689	0.573012	0.721688	-6.43569
ENSG00000086619	ERO1B	0.0518119	1.6287	0.146909	0.883532	0.936035	-6.24192
ENSG00000086666	ZFAND6	-0.0278424	5.99912	-0.156499	0.87599	0.931474	-6.66236
ENSG00000086696	HSD17B2	0.631275	1.35016	1.6637	0.0996488	0.222777	-4.94196
ENSG00000086712	TXLNG	0.155087	1.7673	0.542957	0.588501	0.73387	-6.12223
ENSG00000086717	PPEF1	0.778378	-1.1378	2.79353	0.00636889	0.0308513	-2.66285
ENSG00000086730	LAT2	0.586932	2.68114	1.32659	0.187999	0.344605	-5.4687
ENSG00000086758	HUWE1	-0.322328	5.37693	-1.99902	0.0486211	0.133649	-4.66439
ENSG00000086827	ZW10	0.366421	1.48909	0.985822	0.326862	0.5028	-5.79472
ENSG00000086848	ALG9	-1.18749	3.50425	-3.97855	0.000140003	0.00198472	0.771641
ENSG00000086991	NOX4	0.242959	-0.461912	0.793193	0.429751	0.600867	-5.97848
ENSG00000087008	ACOX3	-0.296263	4.07177	-0.943509	0.347946	0.523716	-6.01464
ENSG00000087053	MTMR2	0.0868641	3.99486	0.316569	0.752303	0.853207	-6.39205
ENSG00000087074	PPP1R15A	0.180818	5.96291	0.63326	0.528169	0.685809	-6.46943
ENSG00000087076	HSD17B14	0.503135	-0.836014	1.6824	0.0959564	0.216907	-4.94155
ENSG00000087077	TRIP6	0.373259	3.63042	1.3634	0.176156	0.329623	-5.49958
ENSG00000087085	ACHE	1.31672	-1.28719	4.7894	6.54e-06	0.00023148	3.64382
ENSG00000087086	FTL	-0.176956	10.2018	-1.21391	0.227958	0.393161	-6.34329
ENSG00000087087	SRRT	0.432923	5.2161	1.49533	0.138325	0.278655	-5.4881
ENSG00000087088	BAX	0.125589	3.99257	0.397154	0.692194	0.810897	-6.36055
ENSG00000087095	NLK	0.209113	3.00788	0.680324	0.498045	0.661858	-6.11538
ENSG00000087111	PIGS	-0.677648	3.244	-1.99186	0.0494157	0.135131	-4.44495
ENSG00000087116	ADAMTS2	0.729964	-1.48092	3.14408	0.00225696	0.014676	-1.75157
ENSG00000087128	TMPRSS11E	0.123581	0.644193	0.268068	0.78926	0.878074	-6.21303
ENSG00000087152	ATXN7L3	-0.0465392	4.21137	-0.166001	0.868528	0.927137	-6.44927
ENSG00000087157	PGS1	-0.185356	4.58194	-0.703862	0.483335	0.64931	-6.26713
ENSG00000087191	PSMC5	-0.13369	5.20696	-0.482053	0.630938	0.765791	-6.4688
ENSG00000087206	UIMC1	-0.660918	4.18542	-2.04453	0.0438216	0.123924	-4.44672
ENSG00000087237	CETP	0.270668	-0.0381591	0.724214	0.470812	0.638309	-6.0082
ENSG00000087245	MMP2	0.913756	-1.36488	3.05403	0.00296931	0.0179301	-1.99046
ENSG00000087250	MT3	0.641452	0.570857	1.25444	0.21293	0.375188	-5.51079
ENSG00000087253	LPCAT2	-0.0580843	1.64864	-0.141314	0.887938	0.938641	-6.25384
ENSG00000087258	GNAO1	1.00467	-0.534056	2.84543	0.00549071	0.0278906	-2.50543
ENSG00000087263	OGFOD1	-0.0401728	3.60406	-0.15935	0.87375	0.930117	-6.3875
ENSG00000087266	SH3BP2	0.442814	4.54803	1.73073	0.0869256	0.201693	-5.04542
ENSG00000087269	NOP14	0.573046	2.70687	2.34459	0.0212468	0.0732585	-3.71827
ENSG00000087274	ADD1	-0.235105	5.74892	-1.54565	0.125696	0.261202	-5.47595
ENSG00000087299	L2HGDH	-0.181529	1.60149	-0.585496	0.559679	0.711893	-6.09286
ENSG00000087301	TXNDC16	0.0487561	0.234759	0.142391	0.887089	0.937935	-6.24285
ENSG00000087302	RTRAF	-0.876544	4.97037	-3.43794	0.000889415	0.00742023	-1.05884
ENSG00000087303	NID2	0.247279	-0.910844	0.715697	0.47603	0.642621	-6.06427
ENSG00000087338	GMCL1	0.171689	2.69948	0.618075	0.538086	0.694062	-6.14193
ENSG00000087365	SF3B2	-0.14335	5.77077	-1.09093	0.278213	0.450201	-6.06131
ENSG00000087448	KLHL42	0.808655	1.11851	3.2671	0.00153854	0.0111644	-1.36036
ENSG00000087460	GNAS	0.3647	7.80537	3.06179	0.00290052	0.0176071	-2.40314
ENSG00000087470	DNM1L	-0.526797	4.92496	-2.02294	0.0460455	0.128464	-4.56992
ENSG00000087494	PTHLH	1.91866	-0.906337	5.82775	8.62e-08	1.24e-05	7.70481
ENSG00000087495	PHACTR3	-0.615829	1.58001	-1.84325	0.0685827	0.171347	-4.61678
ENSG00000087502	ERGIC2	0.0389474	4.71249	0.130993	0.896073	0.942685	-6.51734
ENSG00000087510	TFAP2C	0.0763421	1.80773	0.228555	0.819733	0.897942	-6.24116
ENSG00000087586	AURKA	0.675597	0.240467	1.89692	0.0610445	0.157553	-4.54188
ENSG00000087589	CASS4	0.337243	0.785216	0.824177	0.412017	0.585201	-5.92607
ENSG00000087842	PIR	-0.929138	3.14801	-2.65272	0.009437	0.0408494	-3.02118
ENSG00000087884	AAMDC	-1.93869	3.08973	-4.39019	3.08e-05	0.000686587	2.20151
ENSG00000087903	RFX2	-1.52477	5.6288	-5.41808	4.98e-07	3.92e-05	5.96222
ENSG00000087995	METTL2A	-0.0151413	2.24195	-0.0638932	0.949197	0.972937	-6.29367
ENSG00000088002	SULT2B1	0.126226	0.517286	0.358583	0.720747	0.82965	-6.19172
ENSG00000088035	ALG6	-0.907288	2.26145	-2.44826	0.0162934	0.0607652	-3.44087
ENSG00000088038	CNOT3	-0.838775	3.80415	-3.15805	0.00216191	0.0142272	-1.76313
ENSG00000088053	GP6	0.413596	0.212601	1.26495	0.209152	0.370546	-5.48453
ENSG00000088179	PTPN4	0.127392	3.65854	0.39884	0.690955	0.810044	-6.3277
ENSG00000088205	DDX18	-0.0702935	4.62699	-0.368019	0.713723	0.82515	-6.44707
ENSG00000088247	KHSRP	-0.0820763	5.3115	-0.507182	0.613267	0.752286	-6.46874
ENSG00000088256	GNA11	-0.498787	4.54085	-1.89307	0.0615609	0.158661	-4.76759
ENSG00000088280	ASAP3	-0.840067	3.88235	-2.67403	0.00889966	0.0391242	-3.04032
ENSG00000088298	EDEM2	0.603928	1.63297	1.97365	0.0514872	0.139309	-4.42212
ENSG00000088305	DNMT3B	1.01739	-1.24764	4.01883	0.000121181	0.00180037	0.929508
ENSG00000088320	REM1	-0.0396074	-0.890894	-0.141714	0.887622	0.938429	-6.30257
ENSG00000088325	TPX2	1.36708	0.0254446	4.40919	2.86e-05	0.000653597	2.28353
ENSG00000088356	PDRG1	-0.374826	0.814874	-1.23698	0.21931	0.382876	-5.49695
ENSG00000088367	EPB41L1	-1.02693	5.18088	-3.88477	0.000195262	0.00249902	0.329893
ENSG00000088386	SLC15A1	0.928458	-0.129751	3.25189	0.00161404	0.01153	-1.40389
ENSG00000088387	DOCK9	-0.0311811	4.83655	-0.13951	0.889358	0.939455	-6.53176
ENSG00000088448	ANKRD10	-0.909917	6.57844	-2.74067	0.00739388	0.034239	-3.14276
ENSG00000088451	TGDS	0.912359	1.57611	2.42749	0.0171939	0.0630341	-3.50021
ENSG00000088538	DOCK3	1.00144	-1.42007	4.64582	1.15e-05	0.000345819	3.11158
ENSG00000088543	C3orf18	-0.235007	0.283101	-0.663079	0.508974	0.670783	-6.03599
ENSG00000088682	COQ9	-0.349408	4.08354	-1.50528	0.135752	0.275308	-5.347
ENSG00000088726	TMEM40	-0.319309	2.40158	-0.885218	0.378397	0.553408	-5.9019
ENSG00000088727	KIF9	-0.184433	4.2417	-0.661969	0.509682	0.671416	-6.25753
ENSG00000088756	ARHGAP28	-0.110544	1.58619	-0.344676	0.731142	0.836976	-6.20468
ENSG00000088766	CRLS1	-0.291982	4.61842	-1.36844	0.174579	0.327401	-5.6018
ENSG00000088808	PPP1R13B	-0.438005	4.26475	-1.54224	0.126524	0.26239	-5.31531
ENSG00000088812	ATRN	0.28456	2.35809	1.16199	0.248309	0.415882	-5.65486
ENSG00000088826	SMOX	0.705092	-0.212462	2.19984	0.0303787	0.0949813	-3.97422
ENSG00000088827	SIGLEC1	0.376318	0.869264	0.873228	0.384862	0.559321	-5.88882
ENSG00000088832	FKBP1A	-0.760797	6.07863	-4.50453	1.99e-05	0.000499746	2.41062
ENSG00000088833	NSFL1C	-0.115735	4.59326	-0.603497	0.547695	0.702314	-6.33222
ENSG00000088836	SLC4A11	-0.600054	5.27377	-1.52128	0.131694	0.27004	-5.45908
ENSG00000088854	C20orf194	-0.086656	2.31299	-0.350139	0.727052	0.834157	-6.22756
ENSG00000088876	ZNF343	0.330414	0.177017	1.07482	0.285329	0.45873	-5.69753
ENSG00000088881	EBF4	0.833798	2.04008	2.03655	0.044632	0.125631	-4.31384
ENSG00000088882	CPXM1	1.28165	-1.46247	4.92289	3.84e-06	0.000166033	4.1402
ENSG00000088888	MAVS	0.283227	2.39265	1.66906	0.0985781	0.221097	-4.97291
ENSG00000088899	LZTS3	0.836191	1.63506	3.27673	0.00149246	0.0109234	-1.34918
ENSG00000088930	XRN2	-0.164747	4.12874	-0.991092	0.324297	0.500425	-5.97367
ENSG00000088970	KIZ	-0.268005	2.78841	-0.820367	0.414173	0.586993	-6.00045
ENSG00000088986	DYNLL1	-0.635838	7.98305	-3.17373	0.00205969	0.0137274	-2.10684
ENSG00000088992	TESC	0.879688	-0.0738771	1.94103	0.0553824	0.147154	-4.47324
ENSG00000089006	SNX5	0.428299	5.12038	2.12343	0.0364602	0.108337	-4.39201
ENSG00000089009	RPL6	0.52358	7.27127	2.71953	0.00784432	0.03569	-3.25909
ENSG00000089012	SIRPG	0.429599	-0.589761	1.23004	0.221887	0.385815	-5.55623
ENSG00000089022	MAPKAPK5	-0.50311	4.00668	-2.2621	0.0260975	0.085049	-3.99106
ENSG00000089041	P2RX7	0.335777	0.727787	0.823831	0.412212	0.58527	-5.92733
ENSG00000089048	ESF1	1.02376	2.86737	3.95047	0.000154747	0.00214191	0.691932
ENSG00000089050	RBBP9	0.126422	2.87278	0.421839	0.674148	0.79836	-6.25899
ENSG00000089053	ANAPC5	-0.368659	5.72266	-1.96842	0.0520957	0.1404	-4.75893
ENSG00000089057	SLC23A2	0.201276	3.50694	0.70632	0.481813	0.647921	-6.15091
ENSG00000089060	SLC8B1	0.139165	3.10265	0.512939	0.60925	0.749488	-6.22413
ENSG00000089063	TMEM230	-0.512121	4.95088	-2.2938	0.0241286	0.0803132	-4.02251
ENSG00000089091	DZANK1	-0.745705	2.96142	-2.56367	0.0120149	0.0487552	-3.21812
ENSG00000089094	KDM2B	0.178968	3.72066	0.78271	0.435851	0.606655	-6.11376
ENSG00000089101	CFAP61	-1.37185	4.79197	-3.6688	0.000412299	0.00428279	-0.33083
ENSG00000089123	TASP1	-0.641721	3.14281	-1.88585	0.0625394	0.160402	-4.632
ENSG00000089127	OAS1	-0.694735	6.74786	-2.86077	0.00525329	0.0269854	-2.85735
ENSG00000089154	GCN1	-0.405704	4.46871	-1.41752	0.159782	0.307419	-5.51433
ENSG00000089157	RPLP0	0.0659254	8.06804	0.380114	0.704756	0.819212	-6.8158
ENSG00000089159	PXN	-0.574264	5.64022	-3.58708	0.000543235	0.00525729	-0.664748
ENSG00000089163	SIRT4	0.606733	-1.64955	2.27383	0.0253529	0.0832009	-3.88995
ENSG00000089169	RPH3A	-0.858994	0.734721	-2.1485	0.034358	0.103706	-4.05108
ENSG00000089177	KIF16B	0.454006	1.88979	1.21157	0.228849	0.394028	-5.56831
ENSG00000089195	TRMT6	0.00214826	1.80428	0.00721331	0.994261	0.99663	-6.27004
ENSG00000089199	CHGB	0.897605	-1.2401	3.39712	0.00101552	0.0082195	-1.01901
ENSG00000089220	PEBP1	-0.496234	5.56904	-2.78752	0.00647846	0.0311703	-2.92664
ENSG00000089234	BRAP	0.430988	2.91688	1.69452	0.0936219	0.213128	-4.95303
ENSG00000089248	ERP29	-1.16689	3.92327	-4.6642	1.07e-05	0.000330318	3.14392
ENSG00000089280	FUS	0.151691	6.51914	0.856515	0.393987	0.568803	-6.36596
ENSG00000089289	IGBP1	-0.0679051	3.67563	-0.277291	0.782192	0.873524	-6.36492
ENSG00000089327	FXYD5	0.197092	3.2573	0.543382	0.58821	0.733665	-6.21499
ENSG00000089335	ZNF302	-1.19028	4.32727	-3.8737	0.000203021	0.0025694	0.367096
ENSG00000089351	GRAMD1A	-0.471891	3.77377	-1.36424	0.175891	0.329259	-5.50577
ENSG00000089356	FXYD3	-0.885449	6.91061	-3.99228	0.000133292	0.00191609	0.542572
ENSG00000089486	CDIP1	0.450712	1.70584	1.22849	0.222464	0.386612	-5.5466
ENSG00000089505	CMTM1	-0.585146	0.0548169	-1.58475	0.116528	0.248414	-5.05232
ENSG00000089597	GANAB	-0.315754	4.7335	-1.39251	0.167199	0.317811	-5.5789
ENSG00000089639	GMIP	0.604391	3.28421	1.63976	0.104545	0.230383	-5.06796
ENSG00000089682	RBM41	-0.306094	2.63685	-0.961344	0.338954	0.514532	-5.84713
ENSG00000089685	BIRC5	1.59125	-0.0559243	4.43109	2.63e-05	0.000614202	2.35865
ENSG00000089692	LAG3	0.354454	2.16242	0.929902	0.354908	0.530261	-5.87162
ENSG00000089693	MLF2	0.26474	5.21998	1.81038	0.073572	0.179796	-4.98734
ENSG00000089723	OTUB2	0.452072	-0.459353	1.52633	0.130434	0.268126	-5.15936
ENSG00000089737	DDX24	-0.29383	5.67234	-1.49024	0.139657	0.280443	-5.5478
ENSG00000089775	ZBTB25	-0.0812596	2.45199	-0.333915	0.73922	0.84375	-6.24292
ENSG00000089818	NECAP1	0.354835	4.00352	1.74906	0.0836889	0.19646	-4.95854
ENSG00000089820	ARHGAP4	1.02842	3.2985	2.79451	0.00635124	0.0308022	-2.70393
ENSG00000089847	ANKRD24	1.21334	-0.893852	3.79296	0.000269158	0.00314663	0.207084
ENSG00000089876	DHX32	-0.440393	4.74306	-1.62722	0.107185	0.234501	-5.23784
ENSG00000089902	RCOR1	-0.293031	3.7292	-1.14991	0.253225	0.421964	-5.76448
ENSG00000089916	GPATCH2L	0.182013	3.80283	0.733977	0.464869	0.633249	-6.16043
ENSG00000090006	LTBP4	1.06483	3.63668	2.62494	0.0101816	0.0431631	-3.15347
ENSG00000090013	BLVRB	-0.458095	3.66749	-1.33422	0.185495	0.341553	-5.53759
ENSG00000090020	SLC9A1	0.240864	3.0403	0.943258	0.348073	0.523722	-5.91296
ENSG00000090054	SPTLC1	-0.730777	4.74045	-3.04651	0.00303732	0.0181818	-2.16211
ENSG00000090060	PAPOLA	-0.261443	6.81286	-1.66368	0.0996533	0.222777	-5.40283
ENSG00000090061	CCNK	-0.151758	4.75027	-0.882753	0.37972	0.5547	-6.14496
ENSG00000090097	PCBP4	1.37839	0.505015	4.22112	5.79e-05	0.00106887	1.63071
ENSG00000090104	RGS1	0.89851	4.20375	2.18445	0.0315267	0.097548	-4.1739
ENSG00000090238	YPEL3	-0.591165	4.96989	-2.406	0.0181722	0.0655365	-3.77804
ENSG00000090263	MRPS33	-0.354727	3.80468	-0.988782	0.32542	0.501459	-5.9363
ENSG00000090266	NDUFB2	-0.174948	5.24145	-0.507449	0.61308	0.752286	-6.46139
ENSG00000090273	NUDC	-1.06886	4.77591	-5.94234	5.23e-08	9.32e-06	8.15997
ENSG00000090316	MAEA	0.325475	4.70723	1.69192	0.0941195	0.214023	-5.13137
ENSG00000090339	ICAM1	0.371243	3.38464	0.818043	0.415492	0.587999	-6.04717
ENSG00000090372	STRN4	0.327575	4.7051	1.75282	0.0830365	0.195516	-5.02878
ENSG00000090376	IRAK3	0.287272	3.85331	1.02841	0.306512	0.481641	-5.91079
ENSG00000090382	LYZ	0.392715	6.36662	1.74172	0.0849723	0.19862	-5.22693
ENSG00000090432	MUL1	-0.658038	0.814896	-2.33406	0.0218178	0.0745753	-3.66215
ENSG00000090447	TFAP4	1.23114	1.61037	4.03926	0.000112587	0.00170513	1.00431
ENSG00000090470	PDCD7	0.142439	1.78661	0.479696	0.632606	0.766493	-6.15487
ENSG00000090487	SPG21	-0.285022	5.04477	-1.76633	0.0807288	0.191734	-5.04634
ENSG00000090520	DNAJB11	-0.352012	3.31365	-1.08799	0.279503	0.451933	-5.78304
ENSG00000090530	P3H2	-0.101502	0.0738518	-0.265087	0.791548	0.879367	-6.22312
ENSG00000090539	CHRD	0.9504	-1.44553	3.73256	0.000331583	0.00366001	-0.0026474
ENSG00000090554	FLT3LG	0.323008	1.64529	0.951906	0.343693	0.519124	-5.81755
ENSG00000090565	RAB11FIP3	0.413467	3.01262	1.28933	0.200587	0.359959	-5.54901
ENSG00000090581	GNPTG	-0.311186	3.53987	-1.08739	0.279765	0.452212	-5.81791
ENSG00000090612	ZNF268	0.000105726	2.52784	0.000321632	0.999744	0.999805	-6.29817
ENSG00000090615	GOLGA3	-0.823083	4.68424	-4.01312	0.000123693	0.0018212	0.795543
ENSG00000090621	PABPC4	0.155222	5.67923	0.877781	0.382399	0.557273	-6.25758
ENSG00000090659	CD209	1.23188	-0.209448	3.66942	0.000411428	0.00428188	-0.16833
ENSG00000090661	CERS4	-1.0133	3.45166	-2.77594	0.00669461	0.0319293	-2.74195
ENSG00000090674	MCOLN1	-0.594219	2.78224	-1.91087	0.0592029	0.154061	-4.56204
ENSG00000090686	USP48	-0.0842211	4.907	-0.374394	0.708991	0.822134	-6.48159
ENSG00000090776	EFNB1	0.763703	-0.920412	3.45368	0.000844867	0.00712835	-0.839864
ENSG00000090857	PDPR	0.367637	3.1845	1.64131	0.104221	0.229824	-5.0666
ENSG00000090861	AARS1	0.00347317	4.19202	0.0156797	0.987525	0.9934	-6.46069
ENSG00000090863	GLG1	-0.252864	4.53301	-1.36337	0.176166	0.329623	-5.59664
ENSG00000090889	KIF4A	1.21542	-1.10617	4.5714	1.54e-05	0.000423818	2.84932
ENSG00000090905	TNRC6A	-0.573136	4.68372	-1.99147	0.0494597	0.135184	-4.60473
ENSG00000090924	PLEKHG2	0.9684	3.81698	2.47075	0.0153658	0.058219	-3.51543
ENSG00000090971	NAT14	-0.560537	1.73092	-1.45801	0.148318	0.291866	-5.22316
ENSG00000090975	PITPNM2	0.394762	0.0866575	1.41813	0.159604	0.307255	-5.29258
ENSG00000090989	EXOC1	-0.0778533	4.33889	-0.304882	0.76116	0.859074	-6.43547
ENSG00000091009	RBM27	-0.103002	2.68485	-0.342114	0.733062	0.838641	-6.24895
ENSG00000091039	OSBPL8	-0.225873	4.92442	-1.159	0.249521	0.417338	-5.89037
ENSG00000091073	DTX2	-0.980961	6.73873	-3.87225	0.000204054	0.00257454	0.155741
ENSG00000091106	NLRC4	0.916056	-0.608802	2.4903	0.0145982	0.056167	-3.36291
ENSG00000091127	PUS7	-0.189599	0.852017	-0.564655	0.573713	0.722127	-6.08267
ENSG00000091129	NRCAM	1.70028	-0.559623	4.86511	4.84e-06	0.00019166	3.93153
ENSG00000091136	LAMB1	0.758648	2.88238	1.69366	0.0937864	0.213458	-4.96658
ENSG00000091137	SLC26A4	1.63622	1.74214	3.47208	0.000795432	0.00680933	-0.799136
ENSG00000091140	DLD	-0.37274	4.96864	-1.64339	0.103791	0.229122	-5.23908
ENSG00000091157	WDR7	-0.153831	3.9195	-0.526384	0.599916	0.742785	-6.29394
ENSG00000091164	TXNL1	0.0932013	4.63726	0.49012	0.625241	0.761571	-6.39681
ENSG00000091181	IL5RA	-0.304154	4.70581	-1.14177	0.256577	0.42582	-5.88416
ENSG00000091262	ABCC6	-1.06374	3.32852	-2.91369	0.00450468	0.0241378	-2.38538
ENSG00000091317	CMTM6	-0.0147711	5.07717	-0.102811	0.918342	0.954587	-6.56485
ENSG00000091409	ITGA6	0.285771	2.85193	0.932246	0.353703	0.529134	-5.91074
ENSG00000091428	RAPGEF4	0.17239	-0.259008	0.408796	0.68366	0.804809	-6.1916
ENSG00000091436	MAP3K20	0.979667	1.49029	2.79738	0.00629969	0.0306519	-2.63498
ENSG00000091482	SMPX	1.10331	-1.718	3.63407	0.000463799	0.00467458	-0.316987
ENSG00000091483	FH	-0.907563	2.84473	-2.88488	0.00489907	0.0256233	-2.42834
ENSG00000091490	SEL1L3	-0.400973	5.11166	-1.84427	0.0684316	0.171074	-4.91949
ENSG00000091513	TF	1.2668	1.98352	4.95584	3.36e-06	0.000153476	4.26678
ENSG00000091527	CDV3	0.325505	5.49926	1.84543	0.0682623	0.170716	-4.95572
ENSG00000091536	MYO15A	0.444175	0.761792	1.22672	0.223125	0.387433	-5.52346
ENSG00000091542	ALKBH5	-0.440664	4.68491	-2.85721	0.00530747	0.0271363	-2.65901
ENSG00000091592	NLRP1	0.0851419	2.40685	0.241637	0.809611	0.891514	-6.2808
ENSG00000091622	PITPNM3	0.948542	2.34669	3.39761	0.00101394	0.00821262	-1.02071
ENSG00000091640	SPAG7	-1.7229	4.31973	-6.5012	4.33e-09	2.37e-06	10.5491
ENSG00000091651	ORC6	-1.02274	4.14494	-4.63303	1.21e-05	0.000360213	3.01624
ENSG00000091656	ZFHX4	-0.289722	1.68137	-0.768391	0.444266	0.614449	-5.96101
ENSG00000091664	SLC17A6	0.50174	-0.938334	1.51634	0.132937	0.271874	-5.20242
ENSG00000091732	ZC3HC1	0.277939	1.49063	0.683765	0.495879	0.659965	-6.02997
ENSG00000091831	ESR1	-1.05118	1.15104	-2.27497	0.0252818	0.0830341	-3.78909
ENSG00000091844	RGS17	0.982976	0.267715	3.97373	0.000142436	0.002014	0.807791
ENSG00000091879	ANGPT2	0.39667	-0.072277	1.63941	0.104618	0.230514	-4.97463
ENSG00000091947	TMEM101	-0.3213	1.55713	-0.958472	0.340392	0.515939	-5.8077
ENSG00000091972	CD200	0.307771	0.461548	0.799169	0.426295	0.597717	-5.93864
ENSG00000091986	CCDC80	-1.02202	4.81301	-3.59515	0.000528722	0.00516811	-0.564302
ENSG00000092009	CMA1	0.540873	-1.64364	2.19336	0.0308574	0.0960202	-4.05634
ENSG00000092010	PSME1	-0.0480736	6.41465	-0.289667	0.772737	0.866938	-6.67821
ENSG00000092020	PPP2R3C	-0.099427	4.16351	-0.298239	0.766208	0.862514	-6.41696
ENSG00000092036	HAUS4	-0.205131	3.35451	-0.553664	0.581181	0.728063	-6.21679
ENSG00000092068	SLC7A8	-0.00564681	1.91294	-0.0175403	0.986044	0.992763	-6.26995
ENSG00000092094	OSGEP	-0.543597	2.95872	-1.71307	0.0901406	0.207303	-4.90842
ENSG00000092096	SLC22A17	0.735854	-0.646475	1.9732	0.0515391	0.139404	-4.43462
ENSG00000092098	RNF31	0.0473456	4.93676	0.246578	0.805796	0.889054	-6.52177
ENSG00000092108	SCFD1	-0.625047	5.01299	-1.90627	0.0598051	0.155185	-4.79651
ENSG00000092140	G2E3	-0.873984	3.91512	-2.64658	0.00959717	0.04137	-3.10807
ENSG00000092148	HECTD1	-0.662237	6.45928	-3.76987	0.000291571	0.00333264	-0.155401
ENSG00000092199	HNRNPC	-0.257094	7.66058	-2.17126	0.0325413	0.0998023	-4.55222
ENSG00000092200	RPGRIP1	0.298122	1.5542	0.694266	0.489303	0.654132	-6.04127
ENSG00000092201	SUPT16H	0.00360363	3.96968	0.0175925	0.986003	0.992763	-6.43842
ENSG00000092203	TOX4	0.267202	4.58547	1.40515	0.163418	0.312441	-5.54273
ENSG00000092208	GEMIN2	-0.649307	3.16272	-1.8696	0.0647892	0.164348	-4.66828
ENSG00000092295	TGM1	-0.621552	1.04166	-1.42279	0.158253	0.305409	-5.25544
ENSG00000092330	TINF2	0.439011	4.21841	1.46023	0.147708	0.290932	-5.42298
ENSG00000092377	TBL1Y	0.99383	-1.34482	2.97453	0.00376612	0.0212347	-2.2025
ENSG00000092421	SEMA6A	0.349677	1.80937	0.810509	0.419785	0.59184	-5.94628
ENSG00000092439	TRPM7	-0.659357	4.30732	-3.25026	0.00162231	0.0115775	-1.55049
ENSG00000092445	TYRO3	0.670899	0.607367	2.14392	0.0347344	0.104554	-4.07712
ENSG00000092470	WDR76	1.20968	1.08078	3.6367	0.000459688	0.0046542	-0.272395
ENSG00000092529	CAPN3	0.0903513	2.39589	0.265425	0.791289	0.879287	-6.27381
ENSG00000092531	SNAP23	-0.186787	4.95818	-0.952217	0.343536	0.519038	-6.10981
ENSG00000092621	PHGDH	-0.287003	2.38193	-0.681077	0.497571	0.661411	-6.06579
ENSG00000092758	COL9A3	0.128974	-0.469916	0.394232	0.694342	0.812521	-6.20909
ENSG00000092820	EZR	-0.5003	7.97698	-3.19322	0.00193893	0.0131632	-2.05037
ENSG00000092841	MYL6	0.0271452	8.13322	0.191886	0.848264	0.915681	-6.8762
ENSG00000092847	AGO1	0.359269	2.79242	1.95935	0.0531648	0.142555	-4.49441
ENSG00000092850	TEKT2	-0.852018	4.78191	-2.98453	0.00365602	0.0208288	-2.33212
ENSG00000092853	CLSPN	0.544143	-0.144412	1.64216	0.104045	0.22959	-4.97452
ENSG00000092871	RFFL	0.325084	4.06167	1.44124	0.152986	0.298688	-5.43516
ENSG00000092929	UNC13D	0.0998858	3.38828	0.233849	0.815633	0.89551	-6.3449
ENSG00000092931	MFSD11	-0.376567	3.6277	-1.29002	0.200345	0.359565	-5.58702
ENSG00000092964	DPYSL2	0.905167	2.4418	2.7099	0.00805763	0.0364281	-2.86622
ENSG00000092969	TGFB2	0.878218	-0.0488338	2.95648	0.00397259	0.0221026	-2.20926
ENSG00000092978	GPATCH2	-0.981666	3.51599	-3.36195	0.0011375	0.00892689	-1.15947
ENSG00000093000	NUP50	-0.655663	5.72678	-4.09624	9.16e-05	0.00147152	0.99375
ENSG00000093009	CDC45	1.19818	-1.25496	3.5264	0.000664986	0.00600942	-0.629583
ENSG00000093010	COMT	-0.601281	4.66342	-1.99234	0.0493629	0.135099	-4.59812
ENSG00000093072	ADA2	0.48731	3.8616	1.71042	0.090632	0.208229	-5.00608
ENSG00000093134	VNN3	-0.942618	6.25711	-4.32878	3.88e-05	0.000814588	1.76337
ENSG00000093144	ECHDC1	-0.0537411	5.08943	-0.217714	0.828145	0.9023	-6.54849
ENSG00000093167	LRRFIP2	0.0223332	4.93334	0.119268	0.905329	0.947499	-6.54383
ENSG00000093183	SEC22C	-0.141928	3.34534	-0.458749	0.64752	0.777839	-6.26667
ENSG00000093217	XYLB	-0.575618	0.746065	-1.78356	0.077864	0.187207	-4.72529
ENSG00000094631	HDAC6	-0.470591	4.38928	-1.70086	0.0924209	0.211208	-5.07893
ENSG00000094661	OR1I1	-0.000683656	1.16368	-0.00216876	0.998274	0.999092	-6.25103
ENSG00000094755	GABRP	-0.358959	6.89875	-2.06797	0.0415114	0.119006	-4.68754
ENSG00000094804	CDC6	0.436892	0.319769	1.11554	0.267588	0.438152	-5.65224
ENSG00000094841	UPRT	-0.124192	3.23479	-0.449921	0.653849	0.782634	-6.26699
ENSG00000094880	CDC23	-0.183704	2.45364	-0.565164	0.573368	0.721859	-6.13524
ENSG00000094914	AAAS	0.197056	2.32793	0.580936	0.562735	0.713897	-6.1299
ENSG00000094916	CBX5	0.171101	4.44226	0.974044	0.332644	0.508058	-6.02957
ENSG00000094963	FMO2	0.861859	3.60725	1.98734	0.049924	0.136226	-4.51824
ENSG00000094975	SUCO	0.348346	3.89243	1.33748	0.184434	0.34035	-5.56246
ENSG00000095002	MSH2	0.179894	2.35292	0.676574	0.500411	0.663864	-6.07196
ENSG00000095015	MAP3K1	0.59727	3.4522	2.92803	0.00431941	0.0234515	-2.3669
ENSG00000095059	DHPS	-0.488864	3.94317	-1.67478	0.0974472	0.219099	-5.0712
ENSG00000095066	HOOK2	0.226176	4.52591	0.801317	0.425057	0.596491	-6.18827
ENSG00000095139	ARCN1	-0.206677	4.81192	-1.2386	0.218712	0.382157	-5.78409
ENSG00000095203	EPB41L4B	-0.594581	3.76772	-2.25821	0.0263483	0.0856279	-3.97294
ENSG00000095209	TMEM38B	-0.712004	1.75911	-1.75792	0.0821592	0.194091	-4.76888
ENSG00000095261	PSMD5	-0.119668	3.31375	-0.386024	0.70039	0.815952	-6.29168
ENSG00000095303	PTGS1	0.497187	-0.468023	1.51071	0.134363	0.273783	-5.18214
ENSG00000095319	NUP188	-0.559109	3.90913	-1.92186	0.0577855	0.151611	-4.64658
ENSG00000095321	CRAT	0.186603	1.96657	0.539747	0.590704	0.735785	-6.13184
ENSG00000095370	SH2D3C	0.425784	1.03669	1.00575	0.317233	0.49348	-5.7665
ENSG00000095380	NANS	-0.324283	4.87169	-1.52738	0.130172	0.267867	-5.40485
ENSG00000095383	TBC1D2	-0.13255	2.4184	-0.468508	0.640554	0.772074	-6.19092
ENSG00000095397	WHRN	-0.191852	3.95696	-0.660922	0.51035	0.67208	-6.21907
ENSG00000095464	PDE6C	0.750113	-1.25011	3.09602	0.00261452	0.0163427	-1.87513
ENSG00000095485	CWF19L1	-0.594595	2.66001	-1.65093	0.102237	0.226791	-4.98193
ENSG00000095539	SEMA4G	0.289923	0.428074	0.749919	0.455259	0.624866	-5.97851
ENSG00000095564	BTAF1	0.478304	3.87996	2.56061	0.0121136	0.0490466	-3.31858
ENSG00000095574	IKZF5	0.447635	2.32362	1.40855	0.162411	0.311289	-5.34524
ENSG00000095585	BLNK	-0.309866	3.02279	-0.830739	0.408318	0.581963	-5.99439
ENSG00000095587	TLL2	0.974668	-0.870709	4.14062	7.79e-05	0.00131196	1.34659
ENSG00000095596	CYP26A1	0.234511	-0.611873	0.663041	0.508998	0.670783	-6.08469
ENSG00000095627	TDRD1	0.19211	-0.509471	0.698032	0.486956	0.65243	-6.04859
ENSG00000095637	SORBS1	1.38101	0.632795	4.29413	4.42e-05	0.000893045	1.88131
ENSG00000095739	BAMBI	-0.516949	0.89562	-1.69678	0.0931918	0.212444	-4.85886
ENSG00000095777	MYO3A	1.4407	-1.56416	5.20164	1.23e-06	7.39e-05	5.20635
ENSG00000095787	WAC	-0.183958	6.04234	-1.27317	0.206234	0.367319	-5.87966
ENSG00000095794	CREM	-0.0880106	5.45646	-0.310536	0.756871	0.855863	-6.56513
ENSG00000095906	NUBP2	0.0696017	2.66905	0.217541	0.828279	0.902327	-6.28225
ENSG00000095932	SMIM24	0.421568	-1.41427	1.30149	0.196411	0.354755	-5.5195
ENSG00000095951	HIVEP1	-0.520203	4.59702	-2.19603	0.0306592	0.0956212	-4.18818
ENSG00000095970	TREM2	-0.229071	-0.403653	-0.588202	0.557869	0.710693	-6.1178
ENSG00000096060	FKBP5	-0.499661	3.4778	-1.7615	0.081548	0.193092	-4.87807
ENSG00000096063	SRPK1	0.17349	4.69312	0.768079	0.44445	0.614518	-6.23331
ENSG00000096070	BRPF3	-0.157189	3.13186	-0.67408	0.501988	0.665341	-6.12379
ENSG00000096080	MRPS18A	0.129682	2.9902	0.352705	0.725134	0.832888	-6.27433
ENSG00000096088	PGC	0.406453	-1.61564	1.6194	0.108858	0.236928	-5.08727
ENSG00000096092	TMEM14A	-0.686702	2.85614	-1.62794	0.107033	0.234261	-5.03937
ENSG00000096093	EFHC1	-0.723741	6.98247	-3.60179	0.000517064	0.00507533	-0.73663
ENSG00000096384	HSP90AB1	-0.551524	7.3137	-4.24331	5.34e-05	0.00101296	1.37588
ENSG00000096401	CDC5L	0.547538	2.76336	2.88461	0.00490296	0.0256273	-2.43847
ENSG00000096433	ITPR3	0.692945	2.91016	3.9461	0.00015717	0.00216266	0.676471
ENSG00000096654	ZNF184	0.108448	0.258583	0.416821	0.677801	0.801084	-6.16806
ENSG00000096696	DSP	0.0751644	4.89316	0.404389	0.686886	0.807388	-6.46618
ENSG00000096717	SIRT1	0.503394	2.77392	1.72813	0.0873923	0.202459	-4.89092
ENSG00000096746	HNRNPH3	-0.199274	5.26774	-1.10671	0.271367	0.442573	-5.98773
ENSG00000096872	IFT74	-0.235013	4.55421	-1.06783	0.288454	0.462401	-5.94784
ENSG00000096968	JAK2	-0.216799	4.52037	-1.04286	0.299805	0.474882	-5.96587
ENSG00000096996	IL12RB1	0.312028	1.13431	0.854431	0.395134	0.570158	-5.89199
ENSG00000097007	ABL1	0.282476	3.17022	1.10334	0.272819	0.444324	-5.76894
ENSG00000097021	ACOT7	-0.144747	1.30243	-0.457984	0.648067	0.778326	-6.13906
ENSG00000097033	SH3GLB1	0.0176181	4.97448	0.0936743	0.925576	0.959021	-6.55232
ENSG00000097046	CDC7	-0.185341	0.0955269	-0.570612	0.569684	0.719042	-6.10125
ENSG00000097096	SYDE2	0.58741	0.602899	2.08331	0.0400574	0.116164	-4.19293
ENSG00000099139	PCSK5	-1.35624	4.86411	-2.9293	0.00430339	0.0233722	-2.48345
ENSG00000099194	SCD	0.710166	1.76452	2.60018	0.0108895	0.0453785	-3.10544
ENSG00000099203	TMED1	-0.781938	2.08092	-1.95171	0.05408	0.144369	-4.43937
ENSG00000099204	ABLIM1	-0.356146	6.07985	-2.15909	0.033502	0.101749	-4.42279
ENSG00000099219	ERMP1	-0.0936386	2.98831	-0.454245	0.650746	0.780457	-6.2519
ENSG00000099246	RAB18	-0.105624	5.21886	-0.608746	0.544226	0.698903	-6.40228
ENSG00000099250	NRP1	0.570695	2.37434	1.62015	0.108696	0.23667	-5.05626
ENSG00000099256	PRTFDC1	0.371908	-1.05345	1.29098	0.200015	0.359168	-5.51266
ENSG00000099260	PALMD	-0.133866	3.18554	-0.450721	0.653274	0.782231	-6.25601
ENSG00000099282	TSPAN15	-0.504744	3.86953	-1.51199	0.134037	0.273333	-5.31372
ENSG00000099284	MACROH2A2	-0.286879	0.340423	-0.951853	0.34372	0.519124	-5.81274
ENSG00000099290	WASHC2A	-0.675003	4.36288	-3.14968	0.00221841	0.0144903	-1.83881
ENSG00000099308	MAST3	0.23398	2.28134	0.712666	0.477895	0.644192	-6.04801
ENSG00000099326	MZF1	-0.756554	3.01626	-2.55053	0.0124447	0.0498858	-3.255
ENSG00000099330	OCEL1	-0.98151	2.61665	-2.77388	0.00673371	0.032032	-2.68607
ENSG00000099331	MYO9B	0.0436166	4.89696	0.190238	0.849551	0.916311	-6.5276
ENSG00000099337	KCNK6	-0.451725	2.55486	-1.47544	0.143582	0.285493	-5.25684
ENSG00000099338	CATSPERG	-1.49155	1.99596	-4.10824	8.77e-05	0.00142964	1.2636
ENSG00000099341	PSMD8	-0.880281	4.79239	-3.43135	0.000908736	0.00753163	-1.06324
ENSG00000099364	FBXL19	-0.331744	2.14869	-0.869939	0.386647	0.561021	-5.90366
ENSG00000099365	STX1B	0.635052	-0.843134	1.99945	0.0485742	0.133587	-4.3927
ENSG00000099377	HSD3B7	0.00903556	0.528559	0.0279111	0.977795	0.988619	-6.24734
ENSG00000099381	SETD1A	0.534189	1.60762	1.77534	0.0792201	0.189385	-4.75742
ENSG00000099385	BCL7C	-0.29552	2.5734	-1.08348	0.281487	0.454245	-5.73388
ENSG00000099617	EFNA2	1.08826	-0.793729	2.82339	0.00584918	0.0291783	-2.56933
ENSG00000099622	CIRBP	0.266175	6.43974	1.59646	0.113889	0.244248	-5.46954
ENSG00000099624	ATP5F1D	-0.576021	4.00366	-1.43393	0.155055	0.3014	-5.43403
ENSG00000099625	CBARP	1.09063	-1.49245	4.32213	3.98e-05	0.000828701	1.95655
ENSG00000099725	PRKY	0.715092	1.66824	1.33624	0.184837	0.340793	-5.43954
ENSG00000099769	IGFALS	0.778543	-1.36159	3.167	0.00210304	0.0139313	-1.68286
ENSG00000099783	HNRNPM	-0.13925	6.30213	-1.00824	0.316039	0.492426	-6.20461
ENSG00000099785	MARCHF2	-0.455336	3.43522	-1.49063	0.139554	0.280304	-5.29402
ENSG00000099795	NDUFB7	-1.40523	4.10756	-3.75141	0.000310749	0.00350062	-0.00717528
ENSG00000099797	TECR	-0.765866	5.28166	-3.71464	0.000352597	0.00382493	-0.231837
ENSG00000099800	TIMM13	-0.526992	1.76919	-1.52456	0.130874	0.26875	-5.12555
ENSG00000099804	CDC34	-0.0489397	3.19579	-0.132042	0.895245	0.942307	-6.34998
ENSG00000099810	MTAP	-0.0821483	4.45696	-0.320847	0.74907	0.851084	-6.44694
ENSG00000099812	MISP	0.0309702	4.04171	0.126154	0.899891	0.944641	-6.43521
ENSG00000099814	CEP170B	-0.374094	3.16319	-1.35444	0.178985	0.333127	-5.45731
ENSG00000099817	POLR2E	-0.647231	4.89853	-2.54318	0.0126914	0.0506236	-3.45587
ENSG00000099821	POLRMT	-0.0857243	2.1253	-0.265379	0.791324	0.879287	-6.24282
ENSG00000099834	CDHR5	0.480871	0.0680118	1.43652	0.154321	0.300507	-5.27212
ENSG00000099840	IZUMO4	-0.0130449	0.292225	-0.0368979	0.970648	0.984788	-6.25292
ENSG00000099849	RASSF7	-0.920052	2.77154	-2.74339	0.00733764	0.0340266	-2.76811
ENSG00000099860	GADD45B	0.352438	4.66134	0.82421	0.411998	0.585201	-6.18155
ENSG00000099864	PALM	1.07015	0.625818	3.3333	0.00124686	0.00951059	-1.17075
ENSG00000099866	MADCAM1	0.0479853	-1.41492	0.210659	0.83363	0.905869	-6.32499
ENSG00000099875	MKNK2	0.163227	5.74297	0.758565	0.450094	0.620112	-6.36098
ENSG00000099889	ARVCF	-0.149907	2.07065	-0.410095	0.68271	0.804195	-6.20524
ENSG00000099899	TRMT2A	-0.100392	3.22113	-0.313765	0.754425	0.854574	-6.30555
ENSG00000099901	RANBP1	-0.213356	4.39248	-0.71997	0.473408	0.64051	-6.23128
ENSG00000099904	ZDHHC8	0.66384	2.05139	1.79548	0.0759313	0.183799	-4.75338
ENSG00000099910	KLHL22	-0.742036	3.00821	-1.9541	0.0537922	0.143861	-4.50371
ENSG00000099917	MED15	-0.119052	5.42482	-0.629463	0.53064	0.687822	-6.41308
ENSG00000099937	SERPIND1	0.677568	-0.946889	2.2646	0.0259372	0.084661	-3.87234
ENSG00000099940	SNAP29	-0.397526	3.15597	-1.36886	0.174448	0.327306	-5.43862
ENSG00000099942	CRKL	0.443185	2.79633	2.06574	0.041727	0.119463	-4.28934
ENSG00000099949	LZTR1	0.322516	3.50693	1.04958	0.296721	0.471363	-5.85342
ENSG00000099953	MMP11	0.763027	-1.30612	2.97621	0.00374735	0.0211726	-2.19872
ENSG00000099954	CECR2	1.76264	-1.21008	5.58771	2.43e-07	2.44e-05	6.73304
ENSG00000099956	SMARCB1	-0.661647	4.45592	-2.91641	0.00446901	0.0240251	-2.48065
ENSG00000099957	P2RX6	-1.33592	0.527375	-3.30031	0.00138505	0.0102887	-1.2561
ENSG00000099958	DERL3	0.112305	0.217491	0.400228	0.689937	0.809524	-6.17602
ENSG00000099960	SLC7A4	0.0435125	-0.743012	0.12455	0.901158	0.945568	-6.29486
ENSG00000099968	BCL2L13	-0.196267	4.58567	-1.14366	0.255794	0.424951	-5.86639
ENSG00000099974	DDTL	-0.321031	0.0625479	-0.929501	0.355115	0.530473	-5.83893
ENSG00000099977	DDT	-0.632573	3.6048	-1.54035	0.126983	0.263044	-5.2389
ENSG00000099985	OSM	-0.0508905	2.99302	-0.0846466	0.93273	0.963269	-6.33126
ENSG00000099991	CABIN1	-0.226619	4.84873	-0.953525	0.342877	0.518095	-6.09568
ENSG00000099992	TBC1D10A	0.18109	2.88152	0.599071	0.55063	0.70492	-6.15325
ENSG00000099994	SUSD2	1.06115	-1.43643	4.71585	8.75e-06	0.000284121	3.36835
ENSG00000099995	SF3A1	-0.120699	5.25045	-0.618089	0.538077	0.694062	-6.39949
ENSG00000099998	GGT5	0.686007	0.00823188	1.96455	0.0525497	0.141229	-4.42541
ENSG00000099999	RNF215	-0.420226	1.73869	-1.28852	0.200865	0.360221	-5.45512
ENSG00000100003	SEC14L2	0.644636	3.18713	1.36967	0.174195	0.327016	-5.47341
ENSG00000100012	SEC14L3	-1.141	3.59154	-2.54857	0.01251	0.0500949	-3.31628
ENSG00000100014	SPECC1L	0.313297	3.61843	1.45111	0.150224	0.294627	-5.3798
ENSG00000100023	PPIL2	-0.490399	3.91962	-1.84532	0.0682776	0.170716	-4.78537
ENSG00000100024	UPB1	0.466498	0.000173176	1.23945	0.218399	0.381733	-5.5217
ENSG00000100027	YPEL1	-0.116763	0.111389	-0.340081	0.734587	0.839572	-6.19966
ENSG00000100028	SNRPD3	-0.6147	4.70457	-1.8627	0.065765	0.166181	-4.84018
ENSG00000100029	PES1	0.0302912	3.96788	0.119567	0.905092	0.947395	-6.43403
ENSG00000100030	MAPK1	-0.0748601	4.77172	-0.415384	0.678849	0.801792	-6.44678
ENSG00000100031	GGT1	-0.0126834	0.613564	-0.0304236	0.975797	0.987293	-6.24275
ENSG00000100033	PRODH	-0.271328	2.89489	-0.842527	0.401726	0.576575	-5.98984
ENSG00000100034	PPM1F	-0.373728	2.27218	-1.03562	0.303153	0.478199	-5.76387
ENSG00000100036	SLC35E4	0.628933	-0.0479242	2.21296	0.0294286	0.0927889	-3.94294
ENSG00000100038	TOP3B	-0.0221854	2.18259	-0.0633822	0.949603	0.973036	-6.2803
ENSG00000100053	CRYBB3	0.203485	-0.726626	0.645676	0.520131	0.679993	-6.09949
ENSG00000100055	CYTH4	-0.37228	4.41804	-0.784484	0.434815	0.605591	-6.18514
ENSG00000100056	ESS2	0.723637	1.31825	2.43028	0.0170705	0.0627641	-3.48114
ENSG00000100060	MFNG	1.17129	0.857296	2.4739	0.0152396	0.0578759	-3.38744
ENSG00000100065	CARD10	0.332425	2.52823	0.809462	0.420383	0.592365	-5.99694
ENSG00000100068	LRP5L	0.373756	0.653865	1.07693	0.284389	0.457623	-5.6943
ENSG00000100075	SLC25A1	-0.307844	2.87364	-0.973196	0.333063	0.508603	-5.85606
ENSG00000100077	GRK3	0.612084	2.03714	2.00919	0.0475119	0.13157	-4.35878
ENSG00000100079	LGALS2	-0.192629	1.18622	-0.368494	0.71337	0.824936	-6.17092
[truncated: 14,403 more rows]
